# Supplementary material for: Cytogenetics, genomics and biodiversity of the South American and African Arapaimidae fish family (Teleostei, Osteoglossiformes)
Source: PLoS One. 2019 Mar 25;14(3):e0214225. doi: 10.1371/journal.pone.0214225 (PMC6433368; doi:10.1371/journal.pone.0214225)
Supplement: S1 Table — FreqHomRef represents frequency of homozygotes for reference allele (more common major allele), FreqHomSnp represents frequency of homozygotes for SNP allele (less common minor allele), and FreqHets represents frequency of heterozygotes (CSV) [file pone.0214225.s002.csv]

*
*	*	*	*	*	*	*	*	*	*	*	*	*	*	*	*	*	*	*	*	*	*	*	*	*	*	*	*	*	*	*	*	9,04E+11	9,04E+11	9,04E+11	9,04E+11	9,04E+11	9,04E+11	9,04E+11	9,04E+11	9,04E+11	9,04E+11	9,04E+11	9,04E+11	9,04E+11
*	*	*	*	*	*	*	*	*	*	*	*	*	*	*	*	*	*	*	*	*	*	*	*	*	*	*	*	*	*	*	*	1	1	1	1	1	1	1	1	1	1	1	1	1
*	*	*	*	*	*	*	*	*	*	*	*	*	*	*	*	*	*	*	*	*	*	*	*	*	*	*	*	*	*	*	*	0.988814	0.988235	0.997706	0.990869	0.987421	0.986874	0.971134	0.987159	0.987732	0.987248	0.991011	0.974705	-0.970779
*	*	*	*	*	*	*	*	*	*	*	*	*	*	*	*	*	*	*	*	*	*	*	*	*	*	*	*	*	*	*	*	Arapaima gigas	Chitala lopis	Arapaima Gigas	Chitala lopis	Heterotis niloticus	Notopterus	Heterotis niloticus	Notopterus	Chitala ornata	Xenomystus	Chitala ornata	Papyrocranus	Papyrocranus afer
AlleleID	CloneID	ClusterTempIndex	AlleleSequence	ClusterConsensusSequence	ClusterSize	AlleleSeqDist	SNP	SnpPosition	CallRate	OneRatioRef	OneRatioSnp	FreqHomRef	FreqHomSnp	FreqHets	PICRef	PICSnp	AvgPIC	AvgCountRef	AvgCountSnp	RatioAvgCountRefAvgCountSnp	FreqHetsMinusFreqMinHom	AlleleCountsCorrelation	aggregateTagsTotal	DerivedCorrMinusSeedCorr	RepRef	RepSNP	RepAvg	PicRepRef	PicRepSNP	TotalPicRepRefTest	TotalPicRepSnpTest	904316147001_A_1	904316147001_A_2	904316147001_B_1	904316147001_B_2	904316147001_C_1	904316147001_C_2	904316147001_D_1	904316147001_D_2	904316147001_E_1	904316147001_E_2	904316147001_F_1	904316147001_G_2	904316147001_H_2
100158368|F|0--61:G>A	100158368	117	TGCAGAGAATATTGGACAGTGTAAAGGTTAATCACCACTGCCTGGTTAGCCAAGGAAGACGGGCTAATT	TGCAGAGAATATTGGACAGTGTAAAGGTTAATCACCACTGCCTGGTTAGCCAAGGAAGACGRGCTAATT	2	1		61	0.937500	0.133333	0.866667	0.133333	0.866667	0.000000	0.231111	0.231111	0.231111	2.675.000	2.643.478	101.192	-0.133333	-0.53407	2	0.00000	1.000.000	1.000.000	1.000.000	1.000.000	1.000.000	2.000.000	2.000.000	0	0	0	0	0	0	0	0	0	0	0	0	0
100158368|F|0-61:G>A-61:G>A	100158368	117	TGCAGAGAATATTGGACAGTGTAAAGGTTAATCACCACTGCCTGGTTAGCCAAGGAAGACGAGCTAATT	TGCAGAGAATATTGGACAGTGTAAAGGTTAATCACCACTGCCTGGTTAGCCAAGGAAGACGRGCTAATT	2	1	61:G>A	61	0.937500	0.133333	0.866667	0.133333	0.866667	0.000000	0.231111	0.231111	0.231111	2.675.000	2.643.478	101.192	-0.133333	-0.53407	2	0.00000	1.000.000	1.000.000	1.000.000	1.000.000	1.000.000	2.000.000	2.000.000	1	1	1	1	1	1	1	1	1	1	1	1	1
100158452|F|0--41:G>A	100158452	189	TGCAGAAAATCAATAGGTAATCAAGTCTCCAGTCAAAACCTGAAACTGTGCACAGTTCTTTCCTGAATT	TGCAGAAAATCAATAGGTAATCAAGTCTCCAGTCAAAACCTRAAACTGTGCACAGTYCTTTYCTGAATT	2	3		41	0.500000	0.250000	0.750000	0.250000	0.750000	0.000000	0.375000	0.375000	0.375000	1.500.000	1.200.000	125.000	-0.250000	-0.16932	2	0.00000	1.000.000	1.000.000	1.000.000	1.000.000	1.000.000	0.000000	0.000000	-	0	-	0	-	0	-	0	0	-	0	1	1
100158452|F|0-41:G>A-41:G>A	100158452	189	TGCAGAAAATCAATAGGTAATCAAGTCTCCAGTCAAAACCTAAAACTGTGCACAGTCCTTTTCTGAATT	TGCAGAAAATCAATAGGTAATCAAGTCTCCAGTCAAAACCTRAAACTGTGCACAGTYCTTTYCTGAATT	2	3	41:G>A	41	0.500000	0.250000	0.750000	0.250000	0.750000	0.000000	0.375000	0.375000	0.375000	1.500.000	1.200.000	125.000	-0.250000	-0.16932	2	0.00000	1.000.000	1.000.000	1.000.000	1.000.000	1.000.000	0.000000	0.000000	-	1	-	1	-	1	-	1	1	-	1	0	0
100158458|F|0--38:A>G	100158458	193	TGCAGAAAGAACTCCTCCATGAGGGCTTGTGTCCAGCGATAGTGGAGCCTCCAGGCTTTGGCGGGGTGG	TGCAGAAAGAACTCCTCCATGAGGGCTTGTGTCCAGCGRTAGTGGAGCCTCCAGGCTTTGGCGGGGTGG	2	1		38	0.500000	0.750000	0.250000	0.750000	0.250000	0.000000	0.375000	0.375000	0.375000	1.858.333	1.533.333	121.196	-0.250000	-0.19128	2	0.00000	1.000.000	1.000.000	1.000.000	1.000.000	1.000.000	0.000000	0.000000	-	1	-	1	-	1	-	1	1	-	1	0	0
100158458|F|0-38:A>G-38:A>G	100158458	193	TGCAGAAAGAACTCCTCCATGAGGGCTTGTGTCCAGCGGTAGTGGAGCCTCCAGGCTTTGGCGGGGTGG	TGCAGAAAGAACTCCTCCATGAGGGCTTGTGTCCAGCGRTAGTGGAGCCTCCAGGCTTTGGCGGGGTGG	2	1	38:A>G	38	0.500000	0.750000	0.250000	0.750000	0.250000	0.000000	0.375000	0.375000	0.375000	1.858.333	1.533.333	121.196	-0.250000	-0.19128	2	0.00000	1.000.000	1.000.000	1.000.000	1.000.000	1.000.000	0.000000	0.000000	-	0	-	0	-	0	-	0	0	-	0	1	1
100158483|F|0--47:A>G	100158483	215	TGCAGAACCAACACCATTTTTCCGTGTCAGAGGTGGGTAATGTCCCGACGGTCCCGGCGGTCCGGGCGG	TGCAGAACCAACACCATTTTTCCGTGTCAGAGGTGGGTAATGTCCCGRCGGTCCCGGCGGTCCGGGCGG	2	1		47	0.500000	0.250000	0.750000	0.250000	0.750000	0.000000	0.375000	0.375000	0.375000	700.000	511.111	136.957	-0.250000	-0.18121	2	0.00000	1.000.000	1.000.000	1.000.000	1.000.000	1.000.000	2.000.000	2.000.000	-	1	-	1	-	0	-	0	0	-	0	0	0
100158483|F|0-47:A>G-47:A>G	100158483	215	TGCAGAACCAACACCATTTTTCCGTGTCAGAGGTGGGTAATGTCCCGGCGGTCCCGGCGGTCCGGGCGG	TGCAGAACCAACACCATTTTTCCGTGTCAGAGGTGGGTAATGTCCCGRCGGTCCCGGCGGTCCGGGCGG	2	1	47:A>G	47	0.500000	0.250000	0.750000	0.250000	0.750000	0.000000	0.375000	0.375000	0.375000	700.000	511.111	136.957	-0.250000	-0.18121	2	0.00000	1.000.000	1.000.000	1.000.000	1.000.000	1.000.000	2.000.000	2.000.000	-	0	-	0	-	1	-	1	1	-	1	1	1
100158513|F|0--9:G>A	100158513	239	TGCAGAAGAGCCGCCACGCCGAAATTTCCACATTCCGAGGAAGAACAAAGAAAAAAAAGGTTGTTCCTC	TGCAGAAGARCYGCCACGCCGAAATTTCCACATTCCRAGGAAGAACAAAGAAAAAAAAGGTTGTTCCTC	2	3		9	0.500000	0.250000	0.750000	0.250000	0.750000	0.000000	0.375000	0.375000	0.375000	1.150.000	816.667	140.816	-0.250000	-0.16200	2	0.00000	1.000.000	1.000.000	1.000.000	1.000.000	1.000.000	0.000000	0.000000	-	0	-	0	-	0	-	0	0	-	0	1	1
100158513|F|0-9:G>A-9:G>A	100158513	239	TGCAGAAGAACTGCCACGCCGAAATTTCCACATTCCAAGGAAGAACAAAGAAAAAAAAGGTTGTTCCTC	TGCAGAAGARCYGCCACGCCGAAATTTCCACATTCCRAGGAAGAACAAAGAAAAAAAAGGTTGTTCCTC	2	3	9:G>A	9	0.500000	0.250000	0.750000	0.250000	0.750000	0.000000	0.375000	0.375000	0.375000	1.150.000	816.667	140.816	-0.250000	-0.16200	2	0.00000	1.000.000	1.000.000	1.000.000	1.000.000	1.000.000	0.000000	0.000000	-	1	-	1	-	1	-	1	1	-	1	0	0
100158657|F|0--31:T>C	100158657	350	TGCAGACTGCGAGGTAGATGTGGTGTTAGGATTAGGGGAGCAGACTGAGTGAGGTAATAATCTAGCATG	TGCAGACTGCGAGGTAGATGTGGTGTTAGGAYTAGGGGAGCAGACTGAGTGAGGTAATAATCTAGCATG	2	1		31	0.937500	0.266667	0.733333	0.266667	0.733333	0.000000	0.391111	0.391111	0.391111	5.775.000	5.235.000	110.315	-0.266667	-0.65022	2	0.00000	1.000.000	1.000.000	1.000.000	1.000.000	1.000.000	4.000.000	4.000.000	1	0	1	0	1	0	1	0	0	0	0	0	0
100158657|F|0-31:T>C-31:T>C	100158657	350	TGCAGACTGCGAGGTAGATGTGGTGTTAGGACTAGGGGAGCAGACTGAGTGAGGTAATAATCTAGCATG	TGCAGACTGCGAGGTAGATGTGGTGTTAGGAYTAGGGGAGCAGACTGAGTGAGGTAATAATCTAGCATG	2	1	31:T>C	31	0.937500	0.266667	0.733333	0.266667	0.733333	0.000000	0.391111	0.391111	0.391111	5.775.000	5.235.000	110.315	-0.266667	-0.65022	2	0.00000	1.000.000	1.000.000	1.000.000	1.000.000	1.000.000	4.000.000	4.000.000	0	1	0	1	0	1	0	1	1	1	1	1	1
100158843|F|0--35:A>G	100158843	499	TGCAGATGTTCGAGCCGATGACAGATGGTGCTGGCACAGCCAGGGGACGGTGGACGGGCCTGTGCCAGC	TGCAGATGTTCGAGCCGATGACAGATGGTGCTGGCRCAGCCAGGGGACGGTGGAYGGGCCTGTGCCAGC	2	2		35	0.562500	0.777778	0.222222	0.777778	0.222222	0.000000	0.345679	0.345679	0.345679	538.462	250.000	215.385	-0.222222	-0.18076	2	0.00000	1.000.000	1.000.000	1.000.000	1.000.000	1.000.000	0.000000	0.000000	-	1	-	1	-	1	-	1	1	1	1	0	0
100158843|F|0-35:A>G-35:A>G	100158843	499	TGCAGATGTTCGAGCCGATGACAGATGGTGCTGGCGCAGCCAGGGGACGGTGGATGGGCCTGTGCCAGC	TGCAGATGTTCGAGCCGATGACAGATGGTGCTGGCRCAGCCAGGGGACGGTGGAYGGGCCTGTGCCAGC	2	2	35:A>G	35	0.562500	0.777778	0.222222	0.777778	0.222222	0.000000	0.345679	0.345679	0.345679	538.462	250.000	215.385	-0.222222	-0.18076	2	0.00000	1.000.000	1.000.000	1.000.000	1.000.000	1.000.000	0.000000	0.000000	-	0	-	0	-	0	-	0	0	0	0	1	1
100158931|F|0--22:T>C	100158931	571	TGCAGCACTTGCGGTCCCACAGTCTGACCATTGTAAGCAATGCCTGTGGCACCCTCTGGAACCTTTCAG	TGCAGCACTTGCGGTCCCACAGYCTGACYATTGTAAGCAATGCCTGTGGSACCCTCTGGAACCTTTCAG	2	3		22	0.500000	0.750000	0.250000	0.750000	0.250000	0.000000	0.375000	0.375000	0.375000	1.141.667	400.000	285.417	-0.250000	-0.17564	2	0.00000	1.000.000	1.000.000	1.000.000	1.000.000	1.000.000	0.000000	0.000000	-	1	-	1	-	1	-	1	1	-	1	0	0
100158931|F|0-22:T>C-22:T>C	100158931	571	TGCAGCACTTGCGGTCCCACAGCCTGACTATTGTAAGCAATGCCTGTGGGACCCTCTGGAACCTTTCAG	TGCAGCACTTGCGGTCCCACAGYCTGACYATTGTAAGCAATGCCTGTGGSACCCTCTGGAACCTTTCAG	2	3	22:T>C	22	0.500000	0.750000	0.250000	0.750000	0.250000	0.000000	0.375000	0.375000	0.375000	1.141.667	400.000	285.417	-0.250000	-0.17564	2	0.00000	1.000.000	1.000.000	1.000.000	1.000.000	1.000.000	0.000000	0.000000	-	0	-	0	-	0	-	0	0	-	0	1	1
100159055|F|0--25:T>C	100159055	666	TGCAGCCAAATCGAGGAGCCTGCTGTGCGTGTGGACTGTGTCTCTCCTCGGCCCACTCATTAATATGCA	TGCAGCCAAATCGAGGAGCCTGCTGYGCGTGTGGACTGTGTCTCTCCTCGGCCCASTYATTAATATGCA	2	3		25	0.562500	0.666667	0.333333	0.666667	0.333333	0.000000	0.444444	0.444444	0.444444	3.825.000	1.775.000	215.493	-0.333333	-0.21732	2	0.00000	1.000.000	1.000.000	1.000.000	1.000.000	1.000.000	1.000.000	1.000.000	-	1	-	1	-	1	-	1	1	0	1	0	0
100159055|F|0-25:T>C-25:T>C	100159055	666	TGCAGCCAAATCGAGGAGCCTGCTGCGCGTGTGGACTGTGTCTCTCCTCGGCCCAGTTATTAATATGCA	TGCAGCCAAATCGAGGAGCCTGCTGYGCGTGTGGACTGTGTCTCTCCTCGGCCCASTYATTAATATGCA	2	3	25:T>C	25	0.562500	0.666667	0.333333	0.666667	0.333333	0.000000	0.444444	0.444444	0.444444	3.825.000	1.775.000	215.493	-0.333333	-0.21732	2	0.00000	1.000.000	1.000.000	1.000.000	1.000.000	1.000.000	1.000.000	1.000.000	-	0	-	0	-	0	-	0	0	1	0	1	1
100159087|F|0--23:G>A	100159087	693	TGCAGCCATTTCTGCTAATCATTGGTTAACATCCCGTTCTGTCATCATTAGACTGAAGCGCATGAGATC	TGCAGCCATTTCTGCTAATCATTRGTTAACATCCCGTTYTGTCATCATTASACTGAAGCGCATGAGATC	2	3		23	0.687500	0.181818	0.818182	0.181818	0.818182	0.000000	0.297521	0.297521	0.297521	4.275.000	3.066.667	139.402	-0.181818	-0.30729	2	0.00000	1.000.000	1.000.000	1.000.000	1.000.000	1.000.000	2.000.000	2.000.000	1	0	1	0	-	0	-	0	0	0	0	0	0
100159087|F|0-23:G>A-23:G>A	100159087	693	TGCAGCCATTTCTGCTAATCATTAGTTAACATCCCGTTTTGTCATCATTACACTGAAGCGCATGAGATC	TGCAGCCATTTCTGCTAATCATTRGTTAACATCCCGTTYTGTCATCATTASACTGAAGCGCATGAGATC	2	3	23:G>A	23	0.687500	0.181818	0.818182	0.181818	0.818182	0.000000	0.297521	0.297521	0.297521	4.275.000	3.066.667	139.402	-0.181818	-0.30729	2	0.00000	1.000.000	1.000.000	1.000.000	1.000.000	1.000.000	2.000.000	2.000.000	0	1	0	1	-	1	-	1	1	1	1	1	1
100159182|F|0--58:G>A	100159182	766	TGCAGCGGAGGAATAAGTAATCACAGCTTGTGTAAATACTTCACTTCTAAAAGCTTAAGGCATGAGATC	TGCAGCGGAGGAATAAGTAATCACAGCTTGTGTAAATACTTCACTTCTAAAAGCTTAARGCATGAGATC	2	1		58	0.500000	0.750000	0.250000	0.750000	0.250000	0.000000	0.375000	0.375000	0.375000	3.166.667	2.833.333	111.765	-0.250000	-0.18335	2	0.00000	1.000.000	1.000.000	1.000.000	1.000.000	1.000.000	1.000.000	1.000.000	-	1	-	1	-	1	-	1	1	-	1	0	0
100159182|F|0-58:G>A-58:G>A	100159182	766	TGCAGCGGAGGAATAAGTAATCACAGCTTGTGTAAATACTTCACTTCTAAAAGCTTAAAGCATGAGATC	TGCAGCGGAGGAATAAGTAATCACAGCTTGTGTAAATACTTCACTTCTAAAAGCTTAARGCATGAGATC	2	1	58:G>A	58	0.500000	0.750000	0.250000	0.750000	0.250000	0.000000	0.375000	0.375000	0.375000	3.166.667	2.833.333	111.765	-0.250000	-0.18335	2	0.00000	1.000.000	1.000.000	1.000.000	1.000.000	1.000.000	1.000.000	1.000.000	-	0	-	0	-	0	-	0	0	-	0	1	1
100159227|F|0--31:A>G	100159227	802	TGCAGCTCATTAAGAAGTTGGGCAATGGGCAATTCGGGGAGGTGTGGATGGGTAGGAACCATAGCACAG	TGCAGCTCATTAAGAAGTTGGGCAATGGGCARTTCGGGGAGGTGTGGATGGGTAGGAACCATAGCACAR	2	2		31	0.500000	0.250000	0.750000	0.250000	0.750000	0.000000	0.375000	0.375000	0.375000	2.750.000	2.408.333	114.187	-0.250000	-0.17690	2	0.00000	1.000.000	1.000.000	1.000.000	1.000.000	1.000.000	0.000000	0.000000	-	0	-	0	-	0	-	0	0	-	0	1	1
100159227|F|0-31:A>G-31:A>G	100159227	802	TGCAGCTCATTAAGAAGTTGGGCAATGGGCAGTTCGGGGAGGTGTGGATGGGTAGGAACCATAGCACAA	TGCAGCTCATTAAGAAGTTGGGCAATGGGCARTTCGGGGAGGTGTGGATGGGTAGGAACCATAGCACAR	2	2	31:A>G	31	0.500000	0.250000	0.750000	0.250000	0.750000	0.000000	0.375000	0.375000	0.375000	2.750.000	2.408.333	114.187	-0.250000	-0.17690	2	0.00000	1.000.000	1.000.000	1.000.000	1.000.000	1.000.000	0.000000	0.000000	-	1	-	1	-	1	-	1	1	-	1	0	0
100159233|F|0--11:G>A	100159233	806	TGCAGCTCCTCGCTGTTGCAGCAGCCTCCACATCTGTAGACAGACACGCAGGGTGGTTTATAGAAGGTG	TGCAGCTCCTCRCTGTTGCAGCAGCCTCCACATCTGTAGACAGACACGCAGGGTGGTTTATAGAAGGTG	2	1		11	0.687500	0.454545	0.545455	0.454545	0.545455	0.000000	0.495868	0.495868	0.495868	900.000	627.273	143.478	-0.454545	-0.33025	2	0.00000	1.000.000	1.000.000	1.000.000	1.000.000	1.000.000	2.000.000	2.000.000	-	0	-	0	-	0	-	0	0	1	0	1	1
100159233|F|0-11:G>A-11:G>A	100159233	806	TGCAGCTCCTCACTGTTGCAGCAGCCTCCACATCTGTAGACAGACACGCAGGGTGGTTTATAGAAGGTG	TGCAGCTCCTCRCTGTTGCAGCAGCCTCCACATCTGTAGACAGACACGCAGGGTGGTTTATAGAAGGTG	2	1	11:G>A	11	0.687500	0.454545	0.545455	0.454545	0.545455	0.000000	0.495868	0.495868	0.495868	900.000	627.273	143.478	-0.454545	-0.33025	2	0.00000	1.000.000	1.000.000	1.000.000	1.000.000	1.000.000	2.000.000	2.000.000	-	1	-	1	-	1	-	1	1	0	1	0	0
100159312|F|0--12:C>T	100159312	869	TGCAGCTTCTAGCCCTTCCAGTCAAAGTCCTCTCAGAGCTCCAGGAAAGGACCCCTTTGCACAGCTCTC	TGCAGCTTCTAGYCCYTCCAGTCAAAGTCCTCTCAGAGCTCCAGGAAAGGACCCCTTTGCACAGCTCTC	2	2		12	0.500000	0.250000	0.750000	0.250000	0.750000	0.000000	0.375000	0.375000	0.375000	600.000	481.818	124.528	-0.250000	-0.15920	2	0.00000	1.000.000	1.000.000	1.000.000	1.000.000	1.000.000	0.000000	0.000000	-	0	-	0	-	0	-	0	0	-	0	1	1
100159312|F|0-12:C>T-12:C>T	100159312	869	TGCAGCTTCTAGTCCCTCCAGTCAAAGTCCTCTCAGAGCTCCAGGAAAGGACCCCTTTGCACAGCTCTC	TGCAGCTTCTAGYCCYTCCAGTCAAAGTCCTCTCAGAGCTCCAGGAAAGGACCCCTTTGCACAGCTCTC	2	2	12:C>T	12	0.500000	0.250000	0.750000	0.250000	0.750000	0.000000	0.375000	0.375000	0.375000	600.000	481.818	124.528	-0.250000	-0.15920	2	0.00000	1.000.000	1.000.000	1.000.000	1.000.000	1.000.000	0.000000	0.000000	-	1	-	1	-	1	-	1	1	-	1	0	0
100159377|F|0--32:A>G	100159377	924	TGCAGGACTCTGTTTGGAAACAAGATCAAGTCAGTGGCCAAGAAAGCGTTCTCAGGCCTGGAGGCCCTG	TGCAGGACTCTGTTTGGAAACAAGATCAAGTCRGTGGCCAAGAAAGCGTTCTCAGGCCTGGAGGCCCTG	2	1		32	0.562500	0.222222	0.777778	0.222222	0.777778	0.000000	0.345679	0.345679	0.345679	2.225.000	1.333.333	166.875	-0.222222	-0.24625	2	0.00000	1.000.000	1.000.000	1.000.000	1.000.000	1.000.000	2.000.000	2.000.000	-	0	-	0	-	0	-	0	1	0	1	0	0
100159377|F|0-32:A>G-32:A>G	100159377	924	TGCAGGACTCTGTTTGGAAACAAGATCAAGTCGGTGGCCAAGAAAGCGTTCTCAGGCCTGGAGGCCCTG	TGCAGGACTCTGTTTGGAAACAAGATCAAGTCRGTGGCCAAGAAAGCGTTCTCAGGCCTGGAGGCCCTG	2	1	32:A>G	32	0.562500	0.222222	0.777778	0.222222	0.777778	0.000000	0.345679	0.345679	0.345679	2.225.000	1.333.333	166.875	-0.222222	-0.24625	2	0.00000	1.000.000	1.000.000	1.000.000	1.000.000	1.000.000	2.000.000	2.000.000	-	1	-	1	-	1	-	1	0	1	0	1	1
100159421|F|0--28:T>G	100159421	957	TGCAGGAGGCCCAGGAGTTTGCCAACACTTATGGCTTCCCCATCATCTTCAAGGCAGCCTATGGGGGTG	TGCAGGAGGCCCAGGAGTTTGCCAACACKTAYGGCTTCCCCATCATCTTCAAGGCRGCCTATGGGGGTG	2	3		28	0.500000	0.750000	0.250000	0.750000	0.250000	0.000000	0.375000	0.375000	0.375000	890.909	200.000	445.455	-0.250000	-0.15175	2	0.00000	1.000.000	1.000.000	1.000.000	1.000.000	1.000.000	0.000000	0.000000	-	1	-	1	-	1	-	1	1	-	1	0	0
100159421|F|0-28:T>G-28:T>G	100159421	957	TGCAGGAGGCCCAGGAGTTTGCCAACACGTACGGCTTCCCCATCATCTTCAAGGCGGCCTATGGGGGTG	TGCAGGAGGCCCAGGAGTTTGCCAACACKTAYGGCTTCCCCATCATCTTCAAGGCRGCCTATGGGGGTG	2	3	28:T>G	28	0.500000	0.750000	0.250000	0.750000	0.250000	0.000000	0.375000	0.375000	0.375000	890.909	200.000	445.455	-0.250000	-0.15175	2	0.00000	1.000.000	1.000.000	1.000.000	1.000.000	1.000.000	0.000000	0.000000	-	0	-	0	-	0	-	0	0	-	0	1	1
100159491|F|0--11:C>G	100159491	1015	TGCAGGCCAGGCAAAGTTAACATTTGCAGTTTCAAAGGTTTTCAGCGCTTGCAATGAGCCATGAAATTA	TGCAGGCCAGGSAAAGTTAACATTTGCAGTTTCAAAGGTTTTCAGCGCTTGCAATGAGCCATGAAATTA	2	1		11	0.937500	0.400000	0.600000	0.400000	0.600000	0.000000	0.480000	0.480000	0.480000	3.208.333	2.741.176	117.042	-0.400000	-0.67309	2	0.00000	1.000.000	1.000.000	1.000.000	1.000.000	1.000.000	6.000.000	6.000.000	1	0	1	0	1	0	1	0	0	0	0	0	0
100159491|F|0-11:C>G-11:C>G	100159491	1015	TGCAGGCCAGGGAAAGTTAACATTTGCAGTTTCAAAGGTTTTCAGCGCTTGCAATGAGCCATGAAATTA	TGCAGGCCAGGSAAAGTTAACATTTGCAGTTTCAAAGGTTTTCAGCGCTTGCAATGAGCCATGAAATTA	2	1	11:C>G	11	0.937500	0.400000	0.600000	0.400000	0.600000	0.000000	0.480000	0.480000	0.480000	3.208.333	2.741.176	117.042	-0.400000	-0.67309	2	0.00000	1.000.000	1.000.000	1.000.000	1.000.000	1.000.000	6.000.000	6.000.000	0	1	0	1	0	1	0	1	1	1	1	1	1
100159519|F|0--26:T>G	100159519	1035	TGCAGGCCTGGGTGCCCATCCTGCCCTCCTGGAGGTGTAAGAAGCGCTATGGCGAGCGCTTCACCAGCC	TGCAGGCCTGGGTGCCCATCCTGCCCKCCTGGAGGTGTAAGAAGCGCTATGGCGASCGCTTCACCAGCC	2	2		26	0.500000	0.750000	0.250000	0.750000	0.250000	0.000000	0.375000	0.375000	0.375000	1.400.000	500.000	280.000	-0.250000	-0.16951	2	0.00000	1.000.000	1.000.000	1.000.000	1.000.000	1.000.000	0.000000	0.000000	-	1	-	1	-	1	-	1	1	-	1	0	0
100159519|F|0-26:T>G-26:T>G	100159519	1035	TGCAGGCCTGGGTGCCCATCCTGCCCGCCTGGAGGTGTAAGAAGCGCTATGGCGACCGCTTCACCAGCC	TGCAGGCCTGGGTGCCCATCCTGCCCKCCTGGAGGTGTAAGAAGCGCTATGGCGASCGCTTCACCAGCC	2	2	26:T>G	26	0.500000	0.750000	0.250000	0.750000	0.250000	0.000000	0.375000	0.375000	0.375000	1.400.000	500.000	280.000	-0.250000	-0.16951	2	0.00000	1.000.000	1.000.000	1.000.000	1.000.000	1.000.000	0.000000	0.000000	-	0	-	0	-	0	-	0	0	-	0	1	1
100159669|F|0--11:G>A	100159669	1147	TGCAGGTCCTCGCAGCGGCATTTCTGAGGGCAGGTCGTGCATGACGCGGGTCGCAGGCACAGCAGCATG	TGCAGGTCCTCRCAGCGGCATTTCTGAGGGCAGGTCGTGCATGACGCGGGKCGCAGGCACAGCAGCATG	2	2		11	0.562500	0.666667	0.333333	0.666667	0.333333	0.000000	0.444444	0.444444	0.444444	4.066.667	2.600.000	156.410	-0.333333	-0.23721	2	0.00000	1.000.000	1.000.000	1.000.000	1.000.000	1.000.000	2.000.000	2.000.000	-	1	-	1	-	1	-	1	1	0	1	0	0
100159669|F|0-11:G>A-11:G>A	100159669	1147	TGCAGGTCCTCACAGCGGCATTTCTGAGGGCAGGTCGTGCATGACGCGGGGCGCAGGCACAGCAGCATG	TGCAGGTCCTCRCAGCGGCATTTCTGAGGGCAGGTCGTGCATGACGCGGGKCGCAGGCACAGCAGCATG	2	2	11:G>A	11	0.562500	0.666667	0.333333	0.666667	0.333333	0.000000	0.444444	0.444444	0.444444	4.066.667	2.600.000	156.410	-0.333333	-0.23721	2	0.00000	1.000.000	1.000.000	1.000.000	1.000.000	1.000.000	2.000.000	2.000.000	-	0	-	0	-	0	-	0	0	1	0	1	1
100159703|F|0--21:C>T	100159703	1174	TGCAGGTGGCAGCTCCACAGACAGTGACTGTGCCTTTGAAGGAGATTACGCTGTGCCCCCGCTGCCGGT	TGCAGGTGGCAGCTCCACAGAYAGTGACTGTGCCTTTGAAGGAGAYTACGCTGTGCCCCCGCTGCCRGT	2	3		21	0.500000	0.750000	0.250000	0.750000	0.250000	0.000000	0.375000	0.375000	0.375000	2.275.000	1.700.000	133.824	-0.250000	-0.18248	2	0.00000	1.000.000	1.000.000	1.000.000	1.000.000	1.000.000	1.000.000	1.000.000	-	1	-	1	-	1	-	1	1	-	1	0	0
100159703|F|0-21:C>T-21:C>T	100159703	1174	TGCAGGTGGCAGCTCCACAGATAGTGACTGTGCCTTTGAAGGAGACTACGCTGTGCCCCCGCTGCCAGT	TGCAGGTGGCAGCTCCACAGAYAGTGACTGTGCCTTTGAAGGAGAYTACGCTGTGCCCCCGCTGCCRGT	2	3	21:C>T	21	0.500000	0.750000	0.250000	0.750000	0.250000	0.000000	0.375000	0.375000	0.375000	2.275.000	1.700.000	133.824	-0.250000	-0.18248	2	0.00000	1.000.000	1.000.000	1.000.000	1.000.000	1.000.000	1.000.000	1.000.000	-	0	-	0	-	0	-	0	0	-	0	1	1
100159840|F|0--33:A>G	100159840	1286	TGCAGTCAGTATGCAAGTGTTTAAGATCAGAGCAGGGTTCCGTGTTGAGTTACTTTTCACCAGTCATTT	TGCAGTCAGTATGCAAGTGTTTAAGATCAGAGCRGGGTTCCGTGTTGAGTTACTTTTCACCAGTCATTT	2	1		33	0.687500	0.636364	0.363636	0.636364	0.363636	0.000000	0.462810	0.462810	0.462810	290.909	183.333	158.678	-0.363636	-0.28179	2	0.00000	1.000.000	1.000.000	1.000.000	1.000.000	1.000.000	2.000.000	2.000.000	-	0	-	0	-	0	-	0	1	1	1	1	1
100159840|F|0-33:A>G-33:A>G	100159840	1286	TGCAGTCAGTATGCAAGTGTTTAAGATCAGAGCGGGGTTCCGTGTTGAGTTACTTTTCACCAGTCATTT	TGCAGTCAGTATGCAAGTGTTTAAGATCAGAGCRGGGTTCCGTGTTGAGTTACTTTTCACCAGTCATTT	2	1	33:A>G	33	0.687500	0.636364	0.363636	0.636364	0.363636	0.000000	0.462810	0.462810	0.462810	290.909	183.333	158.678	-0.363636	-0.28179	2	0.00000	1.000.000	1.000.000	1.000.000	1.000.000	1.000.000	2.000.000	2.000.000	-	1	-	1	-	1	-	1	0	0	0	0	0
100159974|F|0--14:C>G	100159974	1404	TGCAGTGGTGTAGACAACGTGTGATCCGAAGAAAGACTACAGTACAAAGTTCATGTTCATGAAGACTTA	TGCAGTGGTGTAGASAACGTGTGATCCGAAGAAAGACTACAGTACAAAGTTCATGTTCAYGAAGACTTR	2	3		14	0.500000	0.750000	0.250000	0.750000	0.250000	0.000000	0.375000	0.375000	0.375000	1.391.667	1.000.000	139.167	-0.250000	-0.16692	2	0.00000	1.000.000	1.000.000	1.000.000	1.000.000	1.000.000	0.000000	0.000000	-	1	-	1	-	1	-	1	1	-	1	0	0
100159974|F|0-14:C>G-14:C>G	100159974	1404	TGCAGTGGTGTAGAGAACGTGTGATCCGAAGAAAGACTACAGTACAAAGTTCATGTTCACGAAGACTTG	TGCAGTGGTGTAGASAACGTGTGATCCGAAGAAAGACTACAGTACAAAGTTCATGTTCAYGAAGACTTR	2	3	14:C>G	14	0.500000	0.750000	0.250000	0.750000	0.250000	0.000000	0.375000	0.375000	0.375000	1.391.667	1.000.000	139.167	-0.250000	-0.16692	2	0.00000	1.000.000	1.000.000	1.000.000	1.000.000	1.000.000	0.000000	0.000000	-	0	-	0	-	0	-	0	0	-	0	1	1
100160053|F|0--20:A>G	100160053	1466	TGCAGTTCTGCATGACGGACACCTCTAATATAATCTGTGTGTCTGAATTCTAATTTATACCGTCAGGAG	TGCAGTTCTGCATGACGGACRCCTCTAATATAATCTGTGTGTCTGAATTCTAATTTATACCGTCAGGRG	2	2		20	0.500000	0.750000	0.250000	0.750000	0.250000	0.000000	0.375000	0.375000	0.375000	383.333	366.667	104.545	-0.250000	-0.18666	2	0.00000	1.000.000	1.000.000	1.000.000	1.000.000	1.000.000	1.000.000	1.000.000	-	1	-	1	-	1	-	1	1	-	1	0	0
100160053|F|0-20:A>G-20:A>G	100160053	1466	TGCAGTTCTGCATGACGGACGCCTCTAATATAATCTGTGTGTCTGAATTCTAATTTATACCGTCAGGGG	TGCAGTTCTGCATGACGGACRCCTCTAATATAATCTGTGTGTCTGAATTCTAATTTATACCGTCAGGRG	2	2	20:A>G	20	0.500000	0.750000	0.250000	0.750000	0.250000	0.000000	0.375000	0.375000	0.375000	383.333	366.667	104.545	-0.250000	-0.18666	2	0.00000	1.000.000	1.000.000	1.000.000	1.000.000	1.000.000	1.000.000	1.000.000	-	0	-	0	-	0	-	0	0	-	0	1	1
100160103|F|0--38:G>A	100160103	1509	TGCAGTTTGGAGCTGCTGTACGGATATTCATGACAACTGTAAGATTTCCTTTCTACAACAAGTAGCATG	TGCAGTTTGGAGCTGCTGTACGGATATTCATGACAACTRTAAGATTTCCTTTCTACAACAAGTAGCATG	2	1		38	0.437500	0.571429	0.428571	0.571429	0.428571	0.000000	0.489796	0.489796	0.489796	4.750.000	2.300.000	206.522	-0.428571	-0.16671	2	0.00000	1.000.000	1.000.000	1.000.000	1.000.000	1.000.000	2.000.000	2.000.000	-	1	-	1	-	0	-	0	1	-	1	-	0
100160103|F|0-38:G>A-38:G>A	100160103	1509	TGCAGTTTGGAGCTGCTGTACGGATATTCATGACAACTATAAGATTTCCTTTCTACAACAAGTAGCATG	TGCAGTTTGGAGCTGCTGTACGGATATTCATGACAACTRTAAGATTTCCTTTCTACAACAAGTAGCATG	2	1	38:G>A	38	0.437500	0.571429	0.428571	0.571429	0.428571	0.000000	0.489796	0.489796	0.489796	4.750.000	2.300.000	206.522	-0.428571	-0.16671	2	0.00000	1.000.000	1.000.000	1.000.000	1.000.000	1.000.000	2.000.000	2.000.000	-	0	-	0	-	1	-	1	0	-	0	-	1
100161622|F|0--11:G>A	100161622	2748	TGCAGGGCAATGCCCATAAGAGACCTAGACCTGAATTTGACACCATCTGCATAGTGACGCTACATGTTT	TGCAGGGCAATRCCCAKAAGAGACCTAGACCTGAATTTGACACCATCTGCATAGTGACGCTASATGTTT	2	3		11	0.625000	0.400000	0.600000	0.400000	0.600000	0.000000	0.480000	0.480000	0.480000	675.000	500.000	135.000	-0.400000	-0.34823	2	0.00000	1.000.000	1.000.000	1.000.000	1.000.000	1.000.000	4.000.000	4.000.000	1	0	1	0	1	0	1	0	0	-	0	-	-
100161622|F|0-11:G>A-11:G>A	100161622	2748	TGCAGGGCAATACCCAGAAGAGACCTAGACCTGAATTTGACACCATCTGCATAGTGACGCTAGATGTTT	TGCAGGGCAATRCCCAKAAGAGACCTAGACCTGAATTTGACACCATCTGCATAGTGACGCTASATGTTT	2	3	11:G>A	11	0.625000	0.400000	0.600000	0.400000	0.600000	0.000000	0.480000	0.480000	0.480000	675.000	500.000	135.000	-0.400000	-0.34823	2	0.00000	1.000.000	1.000.000	1.000.000	1.000.000	1.000.000	4.000.000	4.000.000	0	1	0	1	0	1	0	1	1	-	1	-	-
100162493|F|0--9:C>T	100162493	3437	TGCAGGATGCACCACGTCAAGAAGCTTCAAGATGGTGGCTCCATCATTGGAAATGGTTGCTTTTCCTGG	TGCAGGATGYACCACRTCAAGAAGCTTCAAGATGGTGGCTCCATCATTGGAAATGGTTGCTTTTCCTGS	2	3		9	0.437500	0.857143	0.142857	0.857143	0.142857	0.000000	0.244898	0.244898	0.244898	2.741.667	500.000	548.333	-0.142857	-0.12754	2	0.00000	1.000.000	1.000.000	1.000.000	1.000.000	1.000.000	0.000000	0.000000	-	1	-	1	-	1	-	1	1	0	1	-	-
100162493|F|0-9:C>T-9:C>T	100162493	3437	TGCAGGATGTACCACATCAAGAAGCTTCAAGATGGTGGCTCCATCATTGGAAATGGTTGCTTTTCCTGC	TGCAGGATGYACCACRTCAAGAAGCTTCAAGATGGTGGCTCCATCATTGGAAATGGTTGCTTTTCCTGS	2	3	9:C>T	9	0.437500	0.857143	0.142857	0.857143	0.142857	0.000000	0.244898	0.244898	0.244898	2.741.667	500.000	548.333	-0.142857	-0.12754	2	0.00000	1.000.000	1.000.000	1.000.000	1.000.000	1.000.000	0.000000	0.000000	-	0	-	0	-	0	-	0	0	1	0	-	-
100164564|F|0--16:G>A	100164564	4935	TGCAGACAGCGAGCCAGTCTTTGTCCCGATCTCTCTGCCCCACGGCCCACGTTAGTATGAGCCCTCACT	TGCAGACAGCGAGCCARTMTTTGTCCCGATCTCTCTGCCCCACGGCCCACGTTAGTATGAGCCCTYACT	2	3		16	0.437500	0.857143	0.142857	0.857143	0.142857	0.000000	0.244898	0.244898	0.244898	933.333	700.000	133.333	-0.142857	-0.12126	2	0.00000	1.000.000	1.000.000	1.000.000	1.000.000	1.000.000	0.000000	0.000000	-	1	-	1	-	1	-	1	1	0	1	-	-
100164564|F|0-16:G>A-16:G>A	100164564	4935	TGCAGACAGCGAGCCAATATTTGTCCCGATCTCTCTGCCCCACGGCCCACGTTAGTATGAGCCCTTACT	TGCAGACAGCGAGCCARTMTTTGTCCCGATCTCTCTGCCCCACGGCCCACGTTAGTATGAGCCCTYACT	2	3	16:G>A	16	0.437500	0.857143	0.142857	0.857143	0.142857	0.000000	0.244898	0.244898	0.244898	933.333	700.000	133.333	-0.142857	-0.12126	2	0.00000	1.000.000	1.000.000	1.000.000	1.000.000	1.000.000	0.000000	0.000000	-	0	-	0	-	0	-	0	0	1	0	-	-
100164827|F|0--14:G>A	100164827	5119	TGCAGACCCCACAGGTAGGCGAGCAGAAGAAGACAAGCCCCGAGAGACACAAGCAGGTACCTCTTCTTG	TGCAGACCCCACAGRTAGGCRAGCAGAAGAAGACAAGCCCCGAGAGACACAAGCAGGTACCTCTTCTTG	2	2		14	0.500000	0.750000	0.250000	0.750000	0.250000	0.000000	0.375000	0.375000	0.375000	472.727	400.000	118.182	-0.250000	-0.20849	2	0.00000	1.000.000	1.000.000	1.000.000	1.000.000	1.000.000	2.000.000	2.000.000	-	1	-	1	-	1	-	1	1	-	1	-	-
100164827|F|0-14:G>A-14:G>A	100164827	5119	TGCAGACCCCACAGATAGGCAAGCAGAAGAAGACAAGCCCCGAGAGACACAAGCAGGTACCTCTTCTTG	TGCAGACCCCACAGRTAGGCRAGCAGAAGAAGACAAGCCCCGAGAGACACAAGCAGGTACCTCTTCTTG	2	2	14:G>A	14	0.500000	0.750000	0.250000	0.750000	0.250000	0.000000	0.375000	0.375000	0.375000	472.727	400.000	118.182	-0.250000	-0.20849	2	0.00000	1.000.000	1.000.000	1.000.000	1.000.000	1.000.000	2.000.000	2.000.000	-	0	-	0	-	0	-	0	0	-	0	-	-
100167083|F|0--32:A>G	100167083	6761	TGCAGATGGCCAAACACAGGAAGAGTGGTCTCAGGTTAGTGTTAGAGAGCGGTCTGCCTGCCAAGTGAG	TGCAGATGGCCAAACACAGGAAGAGTGGTCTCRGGTTAGTGTTAGAGAGCGGTCTGCCTGCCAAGTGAG	2	1		32	0.437500	0.428571	0.571429	0.428571	0.571429	0.000000	0.489796	0.489796	0.489796	3.380.000	1.887.500	179.073	-0.428571	-0.18298	2	0.00000	1.000.000	1.000.000	1.000.000	1.000.000	1.000.000	2.000.000	2.000.000	-	0	-	0	-	0	-	0	1	-	1	1	-
100167083|F|0-32:A>G-32:A>G	100167083	6761	TGCAGATGGCCAAACACAGGAAGAGTGGTCTCGGGTTAGTGTTAGAGAGCGGTCTGCCTGCCAAGTGAG	TGCAGATGGCCAAACACAGGAAGAGTGGTCTCRGGTTAGTGTTAGAGAGCGGTCTGCCTGCCAAGTGAG	2	1	32:A>G	32	0.437500	0.428571	0.571429	0.428571	0.571429	0.000000	0.489796	0.489796	0.489796	3.380.000	1.887.500	179.073	-0.428571	-0.18298	2	0.00000	1.000.000	1.000.000	1.000.000	1.000.000	1.000.000	2.000.000	2.000.000	-	1	-	1	-	1	-	1	0	-	0	0	-
100167089|F|0--49:A>G	100167089	6765	TGCAGATGGCCTTCCATGCCAGCAACAGTGAAACGTCATGGGTGCCCTCAATTATGATCGCAGCACTGC	TGCAGATGGCCTTCCATGCCAGCAACAGTGAAACGTCATGGGTGCCCTCRATTATGATCGCAGCAYTGC	2	2		49	0.437500	0.714286	0.285714	0.714286	0.285714	0.000000	0.408163	0.408163	0.408163	3.577.778	2.125.000	168.366	-0.285714	-0.17522	2	0.00000	1.000.000	1.000.000	1.000.000	1.000.000	1.000.000	2.000.000	2.000.000	-	1	-	1	-	0	-	0	1	-	1	-	-
100167089|F|0-49:A>G-49:A>G	100167089	6765	TGCAGATGGCCTTCCATGCCAGCAACAGTGAAACGTCATGGGTGCCCTCGATTATGATCGCAGCATTGC	TGCAGATGGCCTTCCATGCCAGCAACAGTGAAACGTCATGGGTGCCCTCRATTATGATCGCAGCAYTGC	2	2	49:A>G	49	0.437500	0.714286	0.285714	0.714286	0.285714	0.000000	0.408163	0.408163	0.408163	3.577.778	2.125.000	168.366	-0.285714	-0.17522	2	0.00000	1.000.000	1.000.000	1.000.000	1.000.000	1.000.000	2.000.000	2.000.000	-	0	-	0	-	1	-	1	0	-	0	-	-
100167547|F|0--17:A>T	100167547	7098	TGCAGCAACAAATACGAAATCAAAACCCATCTCTCGCGCATAGGTGGTAAGAAATAGTTTTCCATCACA	TGCAGCAACAAATACGAWATCAAAACCCATCTCTCGCRCATAGGTGGTAAGAAATAGTTTTCCATCACA	2	2		17	0.437500	0.857143	0.142857	0.857143	0.142857	0.000000	0.244898	0.244898	0.244898	1.041.667	400.000	260.417	-0.142857	-0.15478	2	0.00000	1.000.000	1.000.000	1.000.000	1.000.000	1.000.000	1.000.000	1.000.000	-	1	-	1	-	1	-	1	1	0	1	-	-
100167547|F|0-17:A>T-17:A>T	100167547	7098	TGCAGCAACAAATACGATATCAAAACCCATCTCTCGCACATAGGTGGTAAGAAATAGTTTTCCATCACA	TGCAGCAACAAATACGAWATCAAAACCCATCTCTCGCRCATAGGTGGTAAGAAATAGTTTTCCATCACA	2	2	17:A>T	17	0.437500	0.857143	0.142857	0.857143	0.142857	0.000000	0.244898	0.244898	0.244898	1.041.667	400.000	260.417	-0.142857	-0.15478	2	0.00000	1.000.000	1.000.000	1.000.000	1.000.000	1.000.000	1.000.000	1.000.000	-	0	-	0	-	0	-	0	0	1	0	-	-
100169025|F|0--54:C>G	100169025	8179	TGCAGCCAGAAACTCATGAATGGCGTTCTCTATGTGGGGCCTGAAAGTGTGGTTCAGCTTAGGATCCAC	TGCAGCCAGAAACTCATGAATGGCGTTCTCTATGTGGGGCCTGAAAGTGTGGTTSAGCTTRGGATCCAC	2	2		54	0.437500	0.857143	0.142857	0.857143	0.142857	0.000000	0.244898	0.244898	0.244898	1.641.667	1.050.000	156.349	-0.142857	-0.13121	2	0.00000	1.000.000	1.000.000	1.000.000	1.000.000	1.000.000	1.000.000	1.000.000	-	1	-	1	-	1	-	1	1	0	1	-	-
100169025|F|0-54:C>G-54:C>G	100169025	8179	TGCAGCCAGAAACTCATGAATGGCGTTCTCTATGTGGGGCCTGAAAGTGTGGTTGAGCTTGGGATCCAC	TGCAGCCAGAAACTCATGAATGGCGTTCTCTATGTGGGGCCTGAAAGTGTGGTTSAGCTTRGGATCCAC	2	2	54:C>G	54	0.437500	0.857143	0.142857	0.857143	0.142857	0.000000	0.244898	0.244898	0.244898	1.641.667	1.050.000	156.349	-0.142857	-0.13121	2	0.00000	1.000.000	1.000.000	1.000.000	1.000.000	1.000.000	1.000.000	1.000.000	-	0	-	0	-	0	-	0	0	1	0	-	-
100169356|F|0--8:G>C	100169356	8410	TGCAGCCCGCGCCGGGCCTTCTCTGAGCAGGGCCCGCTCCGTCTGATCAAGAGTGCCTCTTTCTTTGCA	TGCAGCCCSCGCCGGGCCTTCTCTGAGCAGGGCCCSCTCCGTCTGATCAAGAGTGCCTCTTTCTTTKCA	2	3		8	0.500000	0.250000	0.750000	0.250000	0.750000	0.000000	0.375000	0.375000	0.375000	1.725.000	1.041.667	165.600	-0.250000	-0.24848	2	0.00000	1.000.000	1.000.000	1.000.000	1.000.000	1.000.000	2.000.000	2.000.000	-	0	-	0	-	0	-	0	0	-	0	-	-
100169356|F|0-8:G>C-8:G>C	100169356	8410	TGCAGCCCCCGCCGGGCCTTCTCTGAGCAGGGCCCCCTCCGTCTGATCAAGAGTGCCTCTTTCTTTTCA	TGCAGCCCSCGCCGGGCCTTCTCTGAGCAGGGCCCSCTCCGTCTGATCAAGAGTGCCTCTTTCTTTKCA	2	3	8:G>C	8	0.500000	0.250000	0.750000	0.250000	0.750000	0.000000	0.375000	0.375000	0.375000	1.725.000	1.041.667	165.600	-0.250000	-0.24848	2	0.00000	1.000.000	1.000.000	1.000.000	1.000.000	1.000.000	2.000.000	2.000.000	-	1	-	1	-	1	-	1	1	-	1	-	-
100171496|F|0--20:G>A	100171496	9961	TGCAGCTTGTCCTTCTCCTCGCGCATGAACACGTCCACCAGCAGGGTCTTCTCCTTCTTCAGCTGCTCT	TGCAGCTTGTCCTTCTCCTCRCGCATGAACACGTCCACCAGSAGGGTCTTCTCCTTCTTCAGCTGCTCK	2	3		20	0.437500	0.142857	0.857143	0.142857	0.857143	0.000000	0.244898	0.244898	0.244898	1.250.000	1.133.333	110.294	-0.142857	-0.13551	2	0.00000	1.000.000	1.000.000	1.000.000	1.000.000	1.000.000	1.000.000	1.000.000	-	0	-	0	-	0	-	0	0	1	0	-	-
100171496|F|0-20:G>A-20:G>A	100171496	9961	TGCAGCTTGTCCTTCTCCTCACGCATGAACACGTCCACCAGGAGGGTCTTCTCCTTCTTCAGCTGCTCG	TGCAGCTTGTCCTTCTCCTCRCGCATGAACACGTCCACCAGSAGGGTCTTCTCCTTCTTCAGCTGCTCK	2	3	20:G>A	20	0.437500	0.142857	0.857143	0.142857	0.857143	0.000000	0.244898	0.244898	0.244898	1.250.000	1.133.333	110.294	-0.142857	-0.13551	2	0.00000	1.000.000	1.000.000	1.000.000	1.000.000	1.000.000	1.000.000	1.000.000	-	1	-	1	-	1	-	1	1	0	1	-	-
100172442|F|0--13:G>A	100172442	10651	TGCAGGAGTTTGTGCTGAACAAGAAGAAGGCCTTGGCCCAGAGGAACCTCAATCAATGCATGAGATCGG	TGCAGGAGTTTGTRCTGAACAAGAAGAAGGCCTTRGCCCAGAGGAACCTCAATCAMTGCATGAGATCGG	2	3		13	0.437500	0.142857	0.857143	0.142857	0.857143	0.000000	0.244898	0.244898	0.244898	2.550.000	2.000.000	127.500	-0.142857	-0.12944	2	0.00000	1.000.000	1.000.000	1.000.000	1.000.000	1.000.000	1.000.000	1.000.000	-	0	-	0	-	0	-	0	0	1	0	-	-
100172442|F|0-13:G>A-13:G>A	100172442	10651	TGCAGGAGTTTGTACTGAACAAGAAGAAGGCCTTAGCCCAGAGGAACCTCAATCACTGCATGAGATCGG	TGCAGGAGTTTGTRCTGAACAAGAAGAAGGCCTTRGCCCAGAGGAACCTCAATCAMTGCATGAGATCGG	2	3	13:G>A	13	0.437500	0.142857	0.857143	0.142857	0.857143	0.000000	0.244898	0.244898	0.244898	2.550.000	2.000.000	127.500	-0.142857	-0.12944	2	0.00000	1.000.000	1.000.000	1.000.000	1.000.000	1.000.000	1.000.000	1.000.000	-	1	-	1	-	1	-	1	1	0	1	-	-
100172526|F|0--5:G>T	100172526	10713	TGCAGGATCTTGCAGCGCTCTGAGTCACACTTGCTGTCTTCACAGGGGTGGAACATACCGAGGGTGACA	TGCAGKATCTTGCAGCGCTCYGAGTCACACTTGCTGTCTTCACAGGGGTGGAACATACCGAGGGTGACA	2	2		5	0.437500	0.857143	0.142857	0.857143	0.142857	0.000000	0.244898	0.244898	0.244898	2.825.000	2.100.000	134.524	-0.142857	-0.12730	2	0.00000	1.000.000	1.000.000	1.000.000	1.000.000	1.000.000	1.000.000	1.000.000	-	1	-	1	-	1	-	1	1	0	1	-	-
100172526|F|0-5:G>T-5:G>T	100172526	10713	TGCAGTATCTTGCAGCGCTCCGAGTCACACTTGCTGTCTTCACAGGGGTGGAACATACCGAGGGTGACA	TGCAGKATCTTGCAGCGCTCYGAGTCACACTTGCTGTCTTCACAGGGGTGGAACATACCGAGGGTGACA	2	2	5:G>T	5	0.437500	0.857143	0.142857	0.857143	0.142857	0.000000	0.244898	0.244898	0.244898	2.825.000	2.100.000	134.524	-0.142857	-0.12730	2	0.00000	1.000.000	1.000.000	1.000.000	1.000.000	1.000.000	1.000.000	1.000.000	-	0	-	0	-	0	-	0	0	1	0	-	-
100175771|F|0--60:T>C	100175771	13017	TGCAGTAATCCATGGGAGATTACTTTTTTCCAGCTTTGTGAACCAACAGAATAATAAAGGTCTTAAAAC	TGCAGTAATCCATGGGAGATTACTTTTTTCCAGCTTTGTGAACCAACAGAATAATAAAGGYCTTAAAAC	2	1		60	0.437500	0.142857	0.857143	0.142857	0.857143	0.000000	0.244898	0.244898	0.244898	800.000	508.333	157.377	-0.142857	-0.11891	2	0.00000	1.000.000	1.000.000	1.000.000	1.000.000	1.000.000	0.000000	0.000000	-	0	-	0	-	0	-	0	0	1	0	-	-
100175771|F|0-60:T>C-60:T>C	100175771	13017	TGCAGTAATCCATGGGAGATTACTTTTTTCCAGCTTTGTGAACCAACAGAATAATAAAGGCCTTAAAAC	TGCAGTAATCCATGGGAGATTACTTTTTTCCAGCTTTGTGAACCAACAGAATAATAAAGGYCTTAAAAC	2	1	60:T>C	60	0.437500	0.142857	0.857143	0.142857	0.857143	0.000000	0.244898	0.244898	0.244898	800.000	508.333	157.377	-0.142857	-0.11891	2	0.00000	1.000.000	1.000.000	1.000.000	1.000.000	1.000.000	0.000000	0.000000	-	1	-	1	-	1	-	1	1	0	1	-	-
100177860|F|0--5:T>C	100177860	14515	TGCAGTGCGAGCTCAATTAAAATGAACTTTTAATTTCTGACAAGTAAATTTGTTTTGCATGCGATGCAT	TGCAGYRCGAGCTCAATTAAAATGAACTTTTAATTTCTGACAAGTAAATTTGTTTTGCATGCGATGCAT	2	2		5	0.562500	0.777778	0.222222	0.777778	0.222222	0.000000	0.345679	0.345679	0.345679	691.667	250.000	276.667	-0.222222	-0.22387	2	0.00000	1.000.000	1.000.000	1.000.000	1.000.000	1.000.000	2.000.000	2.000.000	0	1	0	1	-	1	-	1	1	1	1	-	-
100177860|F|0-5:T>C-5:T>C	100177860	14515	TGCAGCACGAGCTCAATTAAAATGAACTTTTAATTTCTGACAAGTAAATTTGTTTTGCATGCGATGCAT	TGCAGYRCGAGCTCAATTAAAATGAACTTTTAATTTCTGACAAGTAAATTTGTTTTGCATGCGATGCAT	2	2	5:T>C	5	0.562500	0.777778	0.222222	0.777778	0.222222	0.000000	0.345679	0.345679	0.345679	691.667	250.000	276.667	-0.222222	-0.22387	2	0.00000	1.000.000	1.000.000	1.000.000	1.000.000	1.000.000	2.000.000	2.000.000	1	0	1	0	-	0	-	0	0	0	0	-	-
100188505|F|0--8:C>T	100188505	22689	TGCAGCCCCACAAATAATGCATGAGATCGGAAGAGCGGTTCAGCAGGAATGCCGAGACCGATCTCGTAT	TGCAGCCCYACAARTAWTGCATGAGATCGGAAGAGCGGTTCAGCAGGAATGCCGAGACCGATCTCGTAT	2	3		8	0.437500	0.857143	0.142857	0.857143	0.142857	0.000000	0.244898	0.244898	0.244898	4.733.333	400.000	1.183.333	-0.142857	-0.12270	2	0.00000	1.000.000	1.000.000	1.000.000	1.000.000	1.000.000	0.000000	0.000000	-	1	-	1	-	1	-	1	1	-	1	-	-
100188505|F|0-8:C>T-8:C>T	100188505	22689	TGCAGCCCTACAAGTATTGCATGAGATCGGAAGAGCGGTTCAGCAGGAATGCCGAGACCGATCTCGTAT	TGCAGCCCYACAARTAWTGCATGAGATCGGAAGAGCGGTTCAGCAGGAATGCCGAGACCGATCTCGTAT	2	3	8:C>T	8	0.437500	0.857143	0.142857	0.857143	0.142857	0.000000	0.244898	0.244898	0.244898	4.733.333	400.000	1.183.333	-0.142857	-0.12270	2	0.00000	1.000.000	1.000.000	1.000.000	1.000.000	1.000.000	0.000000	0.000000	-	0	-	0	-	0	-	0	0	-	0	-	-
100188584|F|0--6:C>A	100188584	22754	TGCAGACAAATTGTGACGCATGAGATCGGAAGAGCGGTTCAGCAGGAATGCCGAGACCGATCTCGTATG	TGCAGAMAAATTSWGACGCATGAGATCGGAAGAGCGGTTCAGCAGGAATGCCGAGACCGATCTCGTATG	2	3		6	0.500000	0.750000	0.250000	0.750000	0.250000	0.000000	0.375000	0.375000	0.375000	4.191.667	2.950.000	142.090	-0.250000	-0.17473	2	0.00000	1.000.000	1.000.000	1.000.000	1.000.000	1.000.000	0.000000	0.000000	-	1	-	1	-	1	-	1	1	-	1	0	0
100188584|F|0-6:C>A-6:C>A	100188584	22754	TGCAGAAAAATTCAGACGCATGAGATCGGAAGAGCGGTTCAGCAGGAATGCCGAGACCGATCTCGTATG	TGCAGAMAAATTSWGACGCATGAGATCGGAAGAGCGGTTCAGCAGGAATGCCGAGACCGATCTCGTATG	2	3	6:C>A	6	0.500000	0.750000	0.250000	0.750000	0.250000	0.000000	0.375000	0.375000	0.375000	4.191.667	2.950.000	142.090	-0.250000	-0.17473	2	0.00000	1.000.000	1.000.000	1.000.000	1.000.000	1.000.000	0.000000	0.000000	-	0	-	0	-	0	-	0	0	-	0	1	1
100188677|F|0--19:C>T	100188677	22839	TGCAGAAGGACCTGGAGATCCAGGCCCTGCATGAGATCGGAAGAGCGGTTCAGCAGGAATGCCGAGACC	TGCAGAAGGACCTGGAGATYCAGGCSYTGCATGAGATCGGAAGAGCGGTTCAGCAGGAATGCCGAGACC	2	3		19	0.500000	0.750000	0.250000	0.750000	0.250000	0.000000	0.375000	0.375000	0.375000	4.291.667	4.200.000	102.183	-0.250000	-0.17352	2	0.00000	1.000.000	1.000.000	1.000.000	1.000.000	1.000.000	0.000000	0.000000	-	1	-	1	-	1	-	1	1	-	1	0	0
100188677|F|0-19:C>T-19:C>T	100188677	22839	TGCAGAAGGACCTGGAGATTCAGGCGTTGCATGAGATCGGAAGAGCGGTTCAGCAGGAATGCCGAGACC	TGCAGAAGGACCTGGAGATYCAGGCSYTGCATGAGATCGGAAGAGCGGTTCAGCAGGAATGCCGAGACC	2	3	19:C>T	19	0.500000	0.750000	0.250000	0.750000	0.250000	0.000000	0.375000	0.375000	0.375000	4.291.667	4.200.000	102.183	-0.250000	-0.17352	2	0.00000	1.000.000	1.000.000	1.000.000	1.000.000	1.000.000	0.000000	0.000000	-	0	-	0	-	0	-	0	0	-	0	1	1
100188690|F|0--7:T>G	100188690	22850	TGCAGAATTGTGATCCCTGTCAGCATGAGATCGGAAGAGCGGTTCAGCAGGAATGCCGAGACCGATCTC	TGCAGAAKTGTGATCCCTGYCAGCATGAGATCGGAAGAGCGGTTCAGCAGGAATGCCGAGACCGATCTC	2	2		7	0.500000	0.750000	0.250000	0.750000	0.250000	0.000000	0.375000	0.375000	0.375000	8.016.667	2.750.000	291.515	-0.250000	-0.18733	2	0.00000	1.000.000	1.000.000	1.000.000	1.000.000	1.000.000	1.000.000	1.000.000	-	1	-	1	-	1	-	1	1	-	1	0	0
100188690|F|0-7:T>G-7:T>G	100188690	22850	TGCAGAAGTGTGATCCCTGCCAGCATGAGATCGGAAGAGCGGTTCAGCAGGAATGCCGAGACCGATCTC	TGCAGAAKTGTGATCCCTGYCAGCATGAGATCGGAAGAGCGGTTCAGCAGGAATGCCGAGACCGATCTC	2	2	7:T>G	7	0.500000	0.750000	0.250000	0.750000	0.250000	0.000000	0.375000	0.375000	0.375000	8.016.667	2.750.000	291.515	-0.250000	-0.18733	2	0.00000	1.000.000	1.000.000	1.000.000	1.000.000	1.000.000	1.000.000	1.000.000	-	0	-	0	-	0	-	0	0	-	0	1	1
100188788|F|0--7:G>A	100188788	22928	TGCAGAGGAATGGCAGGGCATGAGATCGGAAGAGCGGTTCAGCAGGAATGCCGAGACCGATCTCGTATG	TGCAGAGRAATSGCAGGGCATGAGATCGGAAGAGCGGTTCAGCAGGAATGCCGAGACCGATCTCGTATG	2	2		7	0.500000	0.750000	0.250000	0.750000	0.250000	0.000000	0.375000	0.375000	0.375000	3.533.333	2.166.667	163.077	-0.250000	-0.17919	2	0.00000	1.000.000	1.000.000	1.000.000	1.000.000	1.000.000	0.000000	0.000000	-	1	-	1	-	1	-	1	1	-	1	0	0
100188788|F|0-7:G>A-7:G>A	100188788	22928	TGCAGAGAAATCGCAGGGCATGAGATCGGAAGAGCGGTTCAGCAGGAATGCCGAGACCGATCTCGTATG	TGCAGAGRAATSGCAGGGCATGAGATCGGAAGAGCGGTTCAGCAGGAATGCCGAGACCGATCTCGTATG	2	2	7:G>A	7	0.500000	0.750000	0.250000	0.750000	0.250000	0.000000	0.375000	0.375000	0.375000	3.533.333	2.166.667	163.077	-0.250000	-0.17919	2	0.00000	1.000.000	1.000.000	1.000.000	1.000.000	1.000.000	0.000000	0.000000	-	0	-	0	-	0	-	0	0	-	0	1	1
100188881|F|0--26:G>A	100188881	23003	TGCAGATCAAAGCGAGGGTGCTGGCCGAAGTGCATGAGATCGGAAGAGCGGTTCAGCAGGAATGCCGAG	TGCAGATCAAAGCGAGGGTGCTGGCCRAAGTGCATGAGATCGGAAGAGCGGTTCAGCAGGAATGCCGAG	2	1		26	0.562500	0.666667	0.333333	0.666667	0.333333	0.000000	0.444444	0.444444	0.444444	5.766.667	5.460.000	105.617	-0.333333	-0.22979	2	0.00000	1.000.000	1.000.000	1.000.000	1.000.000	1.000.000	1.000.000	1.000.000	-	1	-	1	-	1	-	1	1	0	1	0	0
100188881|F|0-26:G>A-26:G>A	100188881	23003	TGCAGATCAAAGCGAGGGTGCTGGCCAAAGTGCATGAGATCGGAAGAGCGGTTCAGCAGGAATGCCGAG	TGCAGATCAAAGCGAGGGTGCTGGCCRAAGTGCATGAGATCGGAAGAGCGGTTCAGCAGGAATGCCGAG	2	1	26:G>A	26	0.562500	0.666667	0.333333	0.666667	0.333333	0.000000	0.444444	0.444444	0.444444	5.766.667	5.460.000	105.617	-0.333333	-0.22979	2	0.00000	1.000.000	1.000.000	1.000.000	1.000.000	1.000.000	1.000.000	1.000.000	-	0	-	0	-	0	-	0	0	1	0	1	1
100188926|F|0--13:G>T	100188926	23036	TGCAGATTGCATTGCCAGAAGGAACTGAAGCATGAGATCGGAAGAGCGGTTCAGCAGGAATGCCGAGAC	TGCAGATTGCATTKCCAGAAGGAWCTGAAGCATGAGATCGGAAGAGCGGTTCAGCAGGAATGCCGAGAC	2	2		13	0.562500	0.666667	0.333333	0.666667	0.333333	0.000000	0.444444	0.444444	0.444444	7.816.667	4.900.000	159.524	-0.333333	-0.23798	2	0.00000	1.000.000	1.000.000	1.000.000	1.000.000	1.000.000	1.000.000	1.000.000	-	1	-	1	-	1	-	1	1	0	1	0	0
100188926|F|0-13:G>T-13:G>T	100188926	23036	TGCAGATTGCATTTCCAGAAGGATCTGAAGCATGAGATCGGAAGAGCGGTTCAGCAGGAATGCCGAGAC	TGCAGATTGCATTKCCAGAAGGAWCTGAAGCATGAGATCGGAAGAGCGGTTCAGCAGGAATGCCGAGAC	2	2	13:G>T	13	0.562500	0.666667	0.333333	0.666667	0.333333	0.000000	0.444444	0.444444	0.444444	7.816.667	4.900.000	159.524	-0.333333	-0.23798	2	0.00000	1.000.000	1.000.000	1.000.000	1.000.000	1.000.000	1.000.000	1.000.000	-	0	-	0	-	0	-	0	0	1	0	1	1
100188928|F|0--10:T>A	100188928	23037	TGCAGATTGTTGGCATCATCGAACCCATCATCTTGCATGAGATCGGAAGAGCGGTTCAGCAGGAATGCC	TGCAGATTGTWGGCATCATYGARCCCATCATCTTGCATGAGATCGGAAGAGCGGTTCAGCAGGAATGCC	2	3		10	0.562500	0.666667	0.333333	0.666667	0.333333	0.000000	0.444444	0.444444	0.444444	4.875.000	3.433.333	141.990	-0.333333	-0.23668	2	0.00000	1.000.000	1.000.000	1.000.000	1.000.000	1.000.000	2.000.000	2.000.000	-	1	-	1	-	1	-	1	1	0	1	0	0
100188928|F|0-10:T>A-10:T>A	100188928	23037	TGCAGATTGTAGGCATCATTGAGCCCATCATCTTGCATGAGATCGGAAGAGCGGTTCAGCAGGAATGCC	TGCAGATTGTWGGCATCATYGARCCCATCATCTTGCATGAGATCGGAAGAGCGGTTCAGCAGGAATGCC	2	3	10:T>A	10	0.562500	0.666667	0.333333	0.666667	0.333333	0.000000	0.444444	0.444444	0.444444	4.875.000	3.433.333	141.990	-0.333333	-0.23668	2	0.00000	1.000.000	1.000.000	1.000.000	1.000.000	1.000.000	2.000.000	2.000.000	-	0	-	0	-	0	-	0	0	1	0	1	1
100189053|F|0--6:G>A	100189053	23144	TGCAGCGGCGACAGCCTGGAACCAGGCATGAGATCGGAAGAGCGGTTCAGCAGGAATGCCGAGACCGAT	TGCAGCRGCGACRGCCTGGAACCRGGCATGAGATCGGAAGAGCGGTTCAGCAGGAATGCCGAGACCGAT	2	3		6	0.500000	0.750000	0.250000	0.750000	0.250000	0.000000	0.375000	0.375000	0.375000	5.991.667	1.833.333	326.818	-0.250000	-0.18466	2	0.00000	1.000.000	1.000.000	1.000.000	1.000.000	1.000.000	1.000.000	1.000.000	-	1	-	1	-	1	-	1	1	-	1	0	0
100189053|F|0-6:G>A-6:G>A	100189053	23144	TGCAGCAGCGACGGCCTGGAACCGGGCATGAGATCGGAAGAGCGGTTCAGCAGGAATGCCGAGACCGAT	TGCAGCRGCGACRGCCTGGAACCRGGCATGAGATCGGAAGAGCGGTTCAGCAGGAATGCCGAGACCGAT	2	3	6:G>A	6	0.500000	0.750000	0.250000	0.750000	0.250000	0.000000	0.375000	0.375000	0.375000	5.991.667	1.833.333	326.818	-0.250000	-0.18466	2	0.00000	1.000.000	1.000.000	1.000.000	1.000.000	1.000.000	1.000.000	1.000.000	-	0	-	0	-	0	-	0	0	-	0	1	1
100189242|F|0--14:C>T	100189242	23291	TGCAGCGGTCTGCACGGGTTCGAAATGTCGGCACACTTGATCAGCATGAGATCGGAAGAGCGGTTCAGC	TGCAGCGGTCTGCAYGGRTTMGAAATGTCGGCACACTTGATCAGCATGAGATCGGAAGAGCGGTTCAGC	2	3		14	0.500000	0.750000	0.250000	0.750000	0.250000	0.000000	0.375000	0.375000	0.375000	6.625.000	5.050.000	131.188	-0.250000	-0.18489	2	0.00000	1.000.000	1.000.000	1.000.000	1.000.000	1.000.000	1.000.000	1.000.000	-	1	-	1	-	1	-	1	1	-	1	0	0
100189242|F|0-14:C>T-14:C>T	100189242	23291	TGCAGCGGTCTGCATGGATTAGAAATGTCGGCACACTTGATCAGCATGAGATCGGAAGAGCGGTTCAGC	TGCAGCGGTCTGCAYGGRTTMGAAATGTCGGCACACTTGATCAGCATGAGATCGGAAGAGCGGTTCAGC	2	3	14:C>T	14	0.500000	0.750000	0.250000	0.750000	0.250000	0.000000	0.375000	0.375000	0.375000	6.625.000	5.050.000	131.188	-0.250000	-0.18489	2	0.00000	1.000.000	1.000.000	1.000.000	1.000.000	1.000.000	1.000.000	1.000.000	-	0	-	0	-	0	-	0	0	-	0	1	1
100189274|F|0--7:A>G	100189274	23313	TGCAGCTAAGGCATTCCAGCAACGAGCATGAGATCGGAAGAGCGGTTCAGCAGGAATGCCGAGACCGAT	TGCAGCTRAGGCATTCCRGCARCGAGCATGAGATCGGAAGAGCGGTTCAGCAGGAATGCCGAGACCGAT	2	3		7	0.500000	0.250000	0.750000	0.250000	0.750000	0.000000	0.375000	0.375000	0.375000	7.200.000	4.616.667	155.957	-0.250000	-0.18111	2	0.00000	1.000.000	1.000.000	1.000.000	1.000.000	1.000.000	1.000.000	1.000.000	-	0	-	0	-	0	-	0	0	-	0	1	1
100189274|F|0-7:A>G-7:A>G	100189274	23313	TGCAGCTGAGGCATTCCGGCAGCGAGCATGAGATCGGAAGAGCGGTTCAGCAGGAATGCCGAGACCGAT	TGCAGCTRAGGCATTCCRGCARCGAGCATGAGATCGGAAGAGCGGTTCAGCAGGAATGCCGAGACCGAT	2	3	7:A>G	7	0.500000	0.250000	0.750000	0.250000	0.750000	0.000000	0.375000	0.375000	0.375000	7.200.000	4.616.667	155.957	-0.250000	-0.18111	2	0.00000	1.000.000	1.000.000	1.000.000	1.000.000	1.000.000	1.000.000	1.000.000	-	1	-	1	-	1	-	1	1	-	1	0	0
100189283|F|0--5:C>T	100189283	23319	TGCAGCTACTTCCTGAAGAGCATAGATCGGAAGAGCGGTTCAGCAGGAATGCCGAGACCGATCTCGTAT	TGCAGYTACTTCCTGAAGAGCATAGATCGGAAGAGCGGTTCAGCAGGAATGCCGAGACCGATCTCGTAT	2	1		5	0.625000	0.600000	0.600000	0.400000	0.400000	0.200000	0.480000	0.480000	0.480000	211.111	187.500	112.593	-0.200000	-0.03581	2	0.00000	0.800000	0.800000	0.800000	0.500000	0.666667	2.000.000	3.000.000	1	0	1	0	1	-	1	0	0	1	-	-	1
100189283|F|0-5:C>T-5:C>T	100189283	23319	TGCAGTTACTTCCTGAAGAGCATAGATCGGAAGAGCGGTTCAGCAGGAATGCCGAGACCGATCTCGTAT	TGCAGYTACTTCCTGAAGAGCATAGATCGGAAGAGCGGTTCAGCAGGAATGCCGAGACCGATCTCGTAT	2	1	5:C>T	5	0.625000	0.600000	0.600000	0.400000	0.400000	0.200000	0.480000	0.480000	0.480000	211.111	187.500	112.593	-0.200000	-0.03581	2	0.00000	0.800000	0.800000	0.800000	0.500000	0.666667	2.000.000	3.000.000	0	1	0	1	1	-	1	1	1	0	-	-	0
100189311|F|0--12:C>G	100189311	23340	TGCAGCTCCCAGCCTACCCGCATGAGATCGGAAGAGCGGTTCAGCAGGAATGCCGAGACCGATCTCGTA	TGCAGCTCCCAGSMTACCCGCATGAGATCGGAAGAGCGGTTCAGCAGGAATGCCGAGACCGATCTCGTA	2	2		12	0.500000	0.750000	0.250000	0.750000	0.250000	0.000000	0.375000	0.375000	0.375000	4.191.667	2.366.667	177.113	-0.250000	-0.17835	2	0.00000	1.000.000	1.000.000	1.000.000	1.000.000	1.000.000	1.000.000	1.000.000	-	1	-	1	-	1	-	1	1	-	1	0	0
100189311|F|0-12:C>G-12:C>G	100189311	23340	TGCAGCTCCCAGGATACCCGCATGAGATCGGAAGAGCGGTTCAGCAGGAATGCCGAGACCGATCTCGTA	TGCAGCTCCCAGSMTACCCGCATGAGATCGGAAGAGCGGTTCAGCAGGAATGCCGAGACCGATCTCGTA	2	2	12:C>G	12	0.500000	0.750000	0.250000	0.750000	0.250000	0.000000	0.375000	0.375000	0.375000	4.191.667	2.366.667	177.113	-0.250000	-0.17835	2	0.00000	1.000.000	1.000.000	1.000.000	1.000.000	1.000.000	1.000.000	1.000.000	-	0	-	0	-	0	-	0	0	-	0	1	1
100189341|F|0--11:C>T	100189341	23361	TGCAGCTCTTTCCAAGATGGCCGCTTGGCTCGCATGAGATCGGAAGAGCGGTTCAGCAGGAATGCCGAG	TGCAGCTCTTTYCAAGATGGCCGCTTGGCTCGCATGAGATCGGAAGAGCGGTTCAGCAGGAATGCCGAG	2	1		11	0.500000	0.750000	0.250000	0.750000	0.250000	0.000000	0.375000	0.375000	0.375000	8.433.333	4.100.000	205.691	-0.250000	-0.18000	2	0.00000	1.000.000	1.000.000	1.000.000	1.000.000	1.000.000	1.000.000	1.000.000	-	1	-	1	-	1	-	1	1	-	1	0	0
100189341|F|0-11:C>T-11:C>T	100189341	23361	TGCAGCTCTTTTCAAGATGGCCGCTTGGCTCGCATGAGATCGGAAGAGCGGTTCAGCAGGAATGCCGAG	TGCAGCTCTTTYCAAGATGGCCGCTTGGCTCGCATGAGATCGGAAGAGCGGTTCAGCAGGAATGCCGAG	2	1	11:C>T	11	0.500000	0.750000	0.250000	0.750000	0.250000	0.000000	0.375000	0.375000	0.375000	8.433.333	4.100.000	205.691	-0.250000	-0.18000	2	0.00000	1.000.000	1.000.000	1.000.000	1.000.000	1.000.000	1.000.000	1.000.000	-	0	-	0	-	0	-	0	0	-	0	1	1
100189347|F|0--13:C>T	100189347	23366	TGCAGCTGAAGGTCCTGAAAGCATGAGATCGGAAGAGCGGTTCAGCAGGAATGCCGAGACCGATCTCGT	TGCAGCTGAAGGTYCTKAAAGCATGAGATCGGAAGAGCGGTTCAGCAGGAATGCCGAGACCGATCTCGT	2	2		13	0.750000	0.250000	0.750000	0.250000	0.750000	0.000000	0.375000	0.375000	0.375000	8.680.000	6.055.556	143.339	-0.250000	-0.31345	2	0.00000	1.000.000	1.000.000	1.000.000	1.000.000	1.000.000	2.000.000	2.000.000	1	0	1	0	-	0	1	0	0	0	0	0	0
100189347|F|0-13:C>T-13:C>T	100189347	23366	TGCAGCTGAAGGTTCTTAAAGCATGAGATCGGAAGAGCGGTTCAGCAGGAATGCCGAGACCGATCTCGT	TGCAGCTGAAGGTYCTKAAAGCATGAGATCGGAAGAGCGGTTCAGCAGGAATGCCGAGACCGATCTCGT	2	2	13:C>T	13	0.750000	0.250000	0.750000	0.250000	0.750000	0.000000	0.375000	0.375000	0.375000	8.680.000	6.055.556	143.339	-0.250000	-0.31345	2	0.00000	1.000.000	1.000.000	1.000.000	1.000.000	1.000.000	2.000.000	2.000.000	0	1	0	1	-	1	0	1	1	1	1	1	1
100189365|F|0--11:G>C	100189365	23378	TGCAGCTGCTGGACCCGAAAGCTCAGGGCATGAGATCGGAAGAGCGGTTCAGCAGGAATGCCGAGACCG	TGCAGCTGCTGSACCCGAAAGCYCAGGGCATGAGATCGGAAGAGCGGTTCAGCAGGAATGCCGAGACCG	2	2		11	0.562500	0.666667	0.333333	0.666667	0.333333	0.000000	0.444444	0.444444	0.444444	5.733.333	3.300.000	173.737	-0.333333	-0.22095	2	0.00000	1.000.000	1.000.000	1.000.000	1.000.000	1.000.000	2.000.000	2.000.000	-	1	-	1	-	1	-	1	1	0	1	0	0
100189365|F|0-11:G>C-11:G>C	100189365	23378	TGCAGCTGCTGCACCCGAAAGCCCAGGGCATGAGATCGGAAGAGCGGTTCAGCAGGAATGCCGAGACCG	TGCAGCTGCTGSACCCGAAAGCYCAGGGCATGAGATCGGAAGAGCGGTTCAGCAGGAATGCCGAGACCG	2	2	11:G>C	11	0.562500	0.666667	0.333333	0.666667	0.333333	0.000000	0.444444	0.444444	0.444444	5.733.333	3.300.000	173.737	-0.333333	-0.22095	2	0.00000	1.000.000	1.000.000	1.000.000	1.000.000	1.000.000	2.000.000	2.000.000	-	0	-	0	-	0	-	0	0	1	0	1	1
100189373|F|0--5:T>C	100189373	23384	TGCAGTTGGCCCCGGAGCAGGGCATGAGATCGGAAGAGCGGTTCAGCAGGAATGCCGAGACCGATCTCG	TGCAGYTGGCCCCGGAKCAGGGCATGAGATCGGAAGAGCGGTTCAGCAGGAATGCCGAGACCGATCTCG	2	2		5	0.500000	0.750000	0.250000	0.750000	0.250000	0.000000	0.375000	0.375000	0.375000	6.508.333	3.500.000	185.952	-0.250000	-0.18435	2	0.00000	1.000.000	1.000.000	1.000.000	1.000.000	1.000.000	0.000000	0.000000	-	1	-	1	-	1	-	1	1	-	1	0	0
100189373|F|0-5:T>C-5:T>C	100189373	23384	TGCAGCTGGCCCCGGATCAGGGCATGAGATCGGAAGAGCGGTTCAGCAGGAATGCCGAGACCGATCTCG	TGCAGYTGGCCCCGGAKCAGGGCATGAGATCGGAAGAGCGGTTCAGCAGGAATGCCGAGACCGATCTCG	2	2	5:T>C	5	0.500000	0.750000	0.250000	0.750000	0.250000	0.000000	0.375000	0.375000	0.375000	6.508.333	3.500.000	185.952	-0.250000	-0.18435	2	0.00000	1.000.000	1.000.000	1.000.000	1.000.000	1.000.000	0.000000	0.000000	-	0	-	0	-	0	-	0	0	-	0	1	1
100189384|F|0--15:T>C	100189384	23394	TGCAGCTGTGAAGATTAAGAAGCCCATTAAGACAAAGTTCCGCATGAGATCGGAAGAGCGGTTCAGCAG	TGCAGCTGTGAAGATYAAGAAGCCCATWAARACAAAGTTCCGCATGAGATCGGAAGAGCGGTTCAGCAG	2	3		15	0.500000	0.750000	0.250000	0.750000	0.250000	0.000000	0.375000	0.375000	0.375000	4.350.000	2.266.667	191.912	-0.250000	-0.16645	2	0.00000	1.000.000	1.000.000	1.000.000	1.000.000	1.000.000	0.000000	0.000000	-	1	-	1	-	1	-	1	1	-	1	0	0
100189384|F|0-15:T>C-15:T>C	100189384	23394	TGCAGCTGTGAAGATCAAGAAGCCCATAAAAACAAAGTTCCGCATGAGATCGGAAGAGCGGTTCAGCAG	TGCAGCTGTGAAGATYAAGAAGCCCATWAARACAAAGTTCCGCATGAGATCGGAAGAGCGGTTCAGCAG	2	3	15:T>C	15	0.500000	0.750000	0.250000	0.750000	0.250000	0.000000	0.375000	0.375000	0.375000	4.350.000	2.266.667	191.912	-0.250000	-0.16645	2	0.00000	1.000.000	1.000.000	1.000.000	1.000.000	1.000.000	0.000000	0.000000	-	0	-	0	-	0	-	0	0	-	0	1	1
100189551|F|0--10:C>T	100189551	23535	TGCAGGAGTTCTACCGGCAGCGCATGAGATCGGAAGAGCGGTTCAGCAGGAATGCCGAGACCGATCTCG	TGCAGGAGTTYTACCGGCASCGCATGAGATCGGAAGAGCGGTTCAGCAGGAATGCCGAGACCGATCTCG	2	2		10	0.562500	0.888889	0.111111	0.888889	0.111111	0.000000	0.197531	0.197531	0.197531	3.200.000	2.700.000	118.519	-0.111111	-0.12742	2	0.00000	1.000.000	1.000.000	1.000.000	1.000.000	1.000.000	0.000000	0.000000	-	1	-	1	-	1	-	1	1	0	1	1	1
100189551|F|0-10:C>T-10:C>T	100189551	23535	TGCAGGAGTTTTACCGGCACCGCATGAGATCGGAAGAGCGGTTCAGCAGGAATGCCGAGACCGATCTCG	TGCAGGAGTTYTACCGGCASCGCATGAGATCGGAAGAGCGGTTCAGCAGGAATGCCGAGACCGATCTCG	2	2	10:C>T	10	0.562500	0.888889	0.111111	0.888889	0.111111	0.000000	0.197531	0.197531	0.197531	3.200.000	2.700.000	118.519	-0.111111	-0.12742	2	0.00000	1.000.000	1.000.000	1.000.000	1.000.000	1.000.000	0.000000	0.000000	-	0	-	0	-	0	-	0	0	1	0	0	0
100189621|F|0--18:G>A	100189621	23592	TGCAGGCCCAGCTCTACCGAGCATGAGATCGGAAGAGCGGTTCAGCAGGAATGCCGAGACCGATCTCGT	TGCAGGCCCAGCTCTACCRAGCATGAGATCGGAAGAGCGGTTCAGCAGGAATGCCGAGACCGATCTCGT	2	1		18	0.562500	0.888889	0.111111	0.888889	0.111111	0.000000	0.197531	0.197531	0.197531	7.275.000	5.200.000	139.904	-0.111111	-0.15778	2	0.00000	1.000.000	1.000.000	1.000.000	1.000.000	1.000.000	1.000.000	1.000.000	-	1	-	1	-	1	-	1	1	0	1	1	1
100189621|F|0-18:G>A-18:G>A	100189621	23592	TGCAGGCCCAGCTCTACCAAGCATGAGATCGGAAGAGCGGTTCAGCAGGAATGCCGAGACCGATCTCGT	TGCAGGCCCAGCTCTACCRAGCATGAGATCGGAAGAGCGGTTCAGCAGGAATGCCGAGACCGATCTCGT	2	1	18:G>A	18	0.562500	0.888889	0.111111	0.888889	0.111111	0.000000	0.197531	0.197531	0.197531	7.275.000	5.200.000	139.904	-0.111111	-0.15778	2	0.00000	1.000.000	1.000.000	1.000.000	1.000.000	1.000.000	1.000.000	1.000.000	-	0	-	0	-	0	-	0	0	1	0	0	0
100189668|F|0--17:G>A	100189668	23627	TGCAGGCTGCTGGCACGGGTGGGCATGAGATCGGAAGAGCGGTTCAGCAGGAATGCCGAGACCGATCTC	TGCAGGCTGCTGGCACGRGTGGGCATGAGATCGGAAGAGCGGTTCAGCAGGAATGCCGAGACCGATCTC	2	1		17	0.562500	0.666667	0.333333	0.666667	0.333333	0.000000	0.444444	0.444444	0.444444	809.091	525.000	154.113	-0.333333	-0.19308	2	0.00000	1.000.000	1.000.000	1.000.000	1.000.000	1.000.000	0.000000	0.000000	-	1	-	1	-	1	-	1	1	0	1	0	0
100189668|F|0-17:G>A-17:G>A	100189668	23627	TGCAGGCTGCTGGCACGAGTGGGCATGAGATCGGAAGAGCGGTTCAGCAGGAATGCCGAGACCGATCTC	TGCAGGCTGCTGGCACGRGTGGGCATGAGATCGGAAGAGCGGTTCAGCAGGAATGCCGAGACCGATCTC	2	1	17:G>A	17	0.562500	0.666667	0.333333	0.666667	0.333333	0.000000	0.444444	0.444444	0.444444	809.091	525.000	154.113	-0.333333	-0.19308	2	0.00000	1.000.000	1.000.000	1.000.000	1.000.000	1.000.000	0.000000	0.000000	-	0	-	0	-	0	-	0	0	1	0	1	1
100189676|F|0--11:A>G	100189676	23634	TGCAGGCTTATAAACTCCTGCATGAGATCGGAAGAGCGGTTCAGCAGGAATGCCGAGACCGATCTCGTA	TGCAGGCTTATRAACTCCTGCATGAGATCGGAAGAGCGGTTCAGCAGGAATGCCGAGACCGATCTCGTA	2	1		11	0.562500	0.666667	0.333333	0.666667	0.333333	0.000000	0.444444	0.444444	0.444444	4.633.333	3.340.000	138.723	-0.333333	-0.21315	2	0.00000	1.000.000	1.000.000	1.000.000	1.000.000	1.000.000	2.000.000	2.000.000	-	1	-	1	-	1	-	1	1	0	1	0	0
100189676|F|0-11:A>G-11:A>G	100189676	23634	TGCAGGCTTATGAACTCCTGCATGAGATCGGAAGAGCGGTTCAGCAGGAATGCCGAGACCGATCTCGTA	TGCAGGCTTATRAACTCCTGCATGAGATCGGAAGAGCGGTTCAGCAGGAATGCCGAGACCGATCTCGTA	2	1	11:A>G	11	0.562500	0.666667	0.333333	0.666667	0.333333	0.000000	0.444444	0.444444	0.444444	4.633.333	3.340.000	138.723	-0.333333	-0.21315	2	0.00000	1.000.000	1.000.000	1.000.000	1.000.000	1.000.000	2.000.000	2.000.000	-	0	-	0	-	0	-	0	0	1	0	1	1
100189692|F|0--15:G>A	100189692	23645	TGCAGGGAGCGGGTCGGAGCAGTAGAACATTTGTGCGATTTCAGATGTGCATGAGATCGGAAGAGCGGT	TGCAGGGAGCGGGTCRGAGCAGTAGAASATTTGTGCGATTTCAGATGTGCATGAGATCGGAAGAGCGGT	2	2		15	0.500000	0.750000	0.250000	0.750000	0.250000	0.000000	0.375000	0.375000	0.375000	2.650.000	1.775.000	149.296	-0.250000	-0.16730	2	0.00000	1.000.000	1.000.000	1.000.000	1.000.000	1.000.000	1.000.000	1.000.000	-	1	-	1	-	1	-	1	1	-	1	0	0
100189692|F|0-15:G>A-15:G>A	100189692	23645	TGCAGGGAGCGGGTCAGAGCAGTAGAAGATTTGTGCGATTTCAGATGTGCATGAGATCGGAAGAGCGGT	TGCAGGGAGCGGGTCRGAGCAGTAGAASATTTGTGCGATTTCAGATGTGCATGAGATCGGAAGAGCGGT	2	2	15:G>A	15	0.500000	0.750000	0.250000	0.750000	0.250000	0.000000	0.375000	0.375000	0.375000	2.650.000	1.775.000	149.296	-0.250000	-0.16730	2	0.00000	1.000.000	1.000.000	1.000.000	1.000.000	1.000.000	1.000.000	1.000.000	-	0	-	0	-	0	-	0	0	-	0	1	1
100189701|F|0--14:C>T	100189701	23652	TGCAGGGCAATGGCCGTGTTGTTCTGAGATGCATGAGATCGGAAGAGCGGTTCAGCAGGAATGCCGAGA	TGCAGGGCAATGGCYGTGTTGTTCTGAGATGCATGAGATCGGAAGAGCGGTTCAGCAGGAATGCCGAGA	2	1		14	0.562500	0.777778	0.222222	0.777778	0.222222	0.000000	0.345679	0.345679	0.345679	7.650.000	6.666.667	114.750	-0.222222	-0.19826	2	0.00000	1.000.000	1.000.000	1.000.000	1.000.000	1.000.000	1.000.000	1.000.000	-	1	-	1	-	1	-	1	1	1	1	0	0
100189701|F|0-14:C>T-14:C>T	100189701	23652	TGCAGGGCAATGGCTGTGTTGTTCTGAGATGCATGAGATCGGAAGAGCGGTTCAGCAGGAATGCCGAGA	TGCAGGGCAATGGCYGTGTTGTTCTGAGATGCATGAGATCGGAAGAGCGGTTCAGCAGGAATGCCGAGA	2	1	14:C>T	14	0.562500	0.777778	0.222222	0.777778	0.222222	0.000000	0.345679	0.345679	0.345679	7.650.000	6.666.667	114.750	-0.222222	-0.19826	2	0.00000	1.000.000	1.000.000	1.000.000	1.000.000	1.000.000	1.000.000	1.000.000	-	0	-	0	-	0	-	0	0	0	0	1	1
100189735|F|0--5:A>G	100189735	23678	TGCAGAGTGATCAATGCTGGGAAGAGCATGAGATCGGAAGAGCGGTTCAGCAGGAATGCCGAGACCGAT	TGCAGRGTSATCAATGCTGGGAAGAGCATGAGATCGGAAGAGCGGTTCAGCAGGAATGCCGAGACCGAT	2	2		5	0.500000	0.500000	0.500000	0.500000	0.500000	0.000000	0.500000	0.500000	0.500000	8.587.500	3.857.143	222.639	-0.500000	-0.19537	2	0.00000	1.000.000	1.000.000	1.000.000	1.000.000	1.000.000	2.000.000	2.000.000	-	1	-	1	-	-	-	0	1	0	1	0	0
100189735|F|0-5:A>G-5:A>G	100189735	23678	TGCAGGGTCATCAATGCTGGGAAGAGCATGAGATCGGAAGAGCGGTTCAGCAGGAATGCCGAGACCGAT	TGCAGRGTSATCAATGCTGGGAAGAGCATGAGATCGGAAGAGCGGTTCAGCAGGAATGCCGAGACCGAT	2	2	5:A>G	5	0.500000	0.500000	0.500000	0.500000	0.500000	0.000000	0.500000	0.500000	0.500000	8.587.500	3.857.143	222.639	-0.500000	-0.19537	2	0.00000	1.000.000	1.000.000	1.000.000	1.000.000	1.000.000	2.000.000	2.000.000	-	0	-	0	-	-	-	1	0	1	0	1	1
100189761|F|0--13:C>T	100189761	23696	TGCAGGTAATCGACGAAGCGGATCGGATGATTGACAGCATGAGATCGGAAGAGCGGTTCAGCAGGAATG	TGCAGGTAATCGAYGAAGCRGATCGGATGATTGACAGCATGAGATCGGAAGAGCGGTTCAGCAGGAATG	2	2		13	0.500000	0.250000	0.750000	0.250000	0.750000	0.000000	0.375000	0.375000	0.375000	9.600.000	6.441.667	149.030	-0.250000	-0.17759	2	0.00000	1.000.000	1.000.000	1.000.000	1.000.000	1.000.000	0.000000	0.000000	-	0	-	0	-	0	-	0	0	-	0	1	1
100189761|F|0-13:C>T-13:C>T	100189761	23696	TGCAGGTAATCGATGAAGCAGATCGGATGATTGACAGCATGAGATCGGAAGAGCGGTTCAGCAGGAATG	TGCAGGTAATCGAYGAAGCRGATCGGATGATTGACAGCATGAGATCGGAAGAGCGGTTCAGCAGGAATG	2	2	13:C>T	13	0.500000	0.250000	0.750000	0.250000	0.750000	0.000000	0.375000	0.375000	0.375000	9.600.000	6.441.667	149.030	-0.250000	-0.17759	2	0.00000	1.000.000	1.000.000	1.000.000	1.000.000	1.000.000	0.000000	0.000000	-	1	-	1	-	1	-	1	1	-	1	0	0
100189783|F|0--7:G>C	100189783	23711	TGCAGGTGAGCTCGCCGCTCTGCCCGCTGTGCCGCATGAGATCGGAAGAGCGGTTCAGCAGGAATGCCG	TGCAGGTSAGCTCGCCGCTCTGCCCSCTSTGCCGCATGAGATCGGAAGAGCGGTTCAGCAGGAATGCCG	2	3		7	0.500000	0.750000	0.250000	0.750000	0.250000	0.000000	0.375000	0.375000	0.375000	2.350.000	950.000	247.368	-0.250000	-0.15461	2	0.00000	1.000.000	1.000.000	1.000.000	1.000.000	1.000.000	0.000000	0.000000	-	1	-	1	-	1	-	1	1	-	1	0	0
100189783|F|0-7:G>C-7:G>C	100189783	23711	TGCAGGTCAGCTCGCCGCTCTGCCCCCTCTGCCGCATGAGATCGGAAGAGCGGTTCAGCAGGAATGCCG	TGCAGGTSAGCTCGCCGCTCTGCCCSCTSTGCCGCATGAGATCGGAAGAGCGGTTCAGCAGGAATGCCG	2	3	7:G>C	7	0.500000	0.750000	0.250000	0.750000	0.250000	0.000000	0.375000	0.375000	0.375000	2.350.000	950.000	247.368	-0.250000	-0.15461	2	0.00000	1.000.000	1.000.000	1.000.000	1.000.000	1.000.000	0.000000	0.000000	-	0	-	0	-	0	-	0	0	-	0	1	1
100189815|F|0--8:T>C	100189815	23733	TGCAGGTGTTTCCACTTCCCAGCATGAGATCGGAAGAGCGGTTCAGCAGGAATGCCGAGACCGATCTCG	TGCAGGTGYTTCCACTTCCCAGCATGAGATCGGAAGAGCGGTTCAGCAGGAATGCCGAGACCGATCTCG	2	1		8	0.500000	0.750000	0.250000	0.750000	0.250000	0.000000	0.375000	0.375000	0.375000	7.616.667	4.600.000	165.580	-0.250000	-0.18670	2	0.00000	1.000.000	1.000.000	1.000.000	1.000.000	1.000.000	1.000.000	1.000.000	-	1	-	1	-	1	-	1	1	-	1	0	0
100189815|F|0-8:T>C-8:T>C	100189815	23733	TGCAGGTGCTTCCACTTCCCAGCATGAGATCGGAAGAGCGGTTCAGCAGGAATGCCGAGACCGATCTCG	TGCAGGTGYTTCCACTTCCCAGCATGAGATCGGAAGAGCGGTTCAGCAGGAATGCCGAGACCGATCTCG	2	1	8:T>C	8	0.500000	0.750000	0.250000	0.750000	0.250000	0.000000	0.375000	0.375000	0.375000	7.616.667	4.600.000	165.580	-0.250000	-0.18670	2	0.00000	1.000.000	1.000.000	1.000.000	1.000.000	1.000.000	1.000.000	1.000.000	-	0	-	0	-	0	-	0	0	-	0	1	1
100189817|F|0--23:C>A	100189817	23735	TGCAGGTGGAAGATCCACGAGGCCTGCATGAGATCGGAAGAGCGGTTCAGCAGGAATGCCGAGACCGAT	TGCAGGTGGAAGATCCACGAGGCMTGCATGAGATCGGAAGAGCGGTTCAGCAGGAATGCCGAGACCGAT	2	1		23	0.562500	0.777778	0.222222	0.777778	0.222222	0.000000	0.345679	0.345679	0.345679	5.635.714	2.600.000	216.758	-0.222222	-0.20597	2	0.00000	1.000.000	1.000.000	1.000.000	1.000.000	1.000.000	1.000.000	1.000.000	-	1	-	1	-	0	-	0	1	1	1	1	1
100189817|F|0-23:C>A-23:C>A	100189817	23735	TGCAGGTGGAAGATCCACGAGGCATGCATGAGATCGGAAGAGCGGTTCAGCAGGAATGCCGAGACCGAT	TGCAGGTGGAAGATCCACGAGGCMTGCATGAGATCGGAAGAGCGGTTCAGCAGGAATGCCGAGACCGAT	2	1	23:C>A	23	0.562500	0.777778	0.222222	0.777778	0.222222	0.000000	0.345679	0.345679	0.345679	5.635.714	2.600.000	216.758	-0.222222	-0.20597	2	0.00000	1.000.000	1.000.000	1.000.000	1.000.000	1.000.000	1.000.000	1.000.000	-	0	-	0	-	1	-	1	0	0	0	0	0
100189851|F|0--5:A>G	100189851	23762	TGCAGATTTGTGCATATTGACAAGTTAGTAGCTAATTTTAAACAAAGCATGAGATCGGAAGAGCGGTTC	TGCAGRTTTGTGCRTATTGACAAGTTAGTAGCTAATTTTAAACAAAGCATGAGATCGGAAGAGCGGTTC	2	2		5	0.437500	0.571429	0.428571	0.571429	0.428571	0.000000	0.489796	0.489796	0.489796	3.875.000	1.620.000	239.198	-0.428571	-0.17044	2	0.00000	1.000.000	1.000.000	1.000.000	1.000.000	1.000.000	2.000.000	2.000.000	-	1	-	1	-	0	-	0	1	-	1	-	0
100189851|F|0-5:A>G-5:A>G	100189851	23762	TGCAGGTTTGTGCGTATTGACAAGTTAGTAGCTAATTTTAAACAAAGCATGAGATCGGAAGAGCGGTTC	TGCAGRTTTGTGCRTATTGACAAGTTAGTAGCTAATTTTAAACAAAGCATGAGATCGGAAGAGCGGTTC	2	2	5:A>G	5	0.437500	0.571429	0.428571	0.571429	0.428571	0.000000	0.489796	0.489796	0.489796	3.875.000	1.620.000	239.198	-0.428571	-0.17044	2	0.00000	1.000.000	1.000.000	1.000.000	1.000.000	1.000.000	2.000.000	2.000.000	-	0	-	0	-	1	-	1	0	-	0	-	1
100189886|F|0--10:A>G	100189886	23793	TGCAGTAATAAGGCCCTTCAGCACACTGTCGCAGCCCAGCTATGCAGCAAGCATGAGATCGGAAGAGCG	TGCAGTAATARGGCCCTYCRGCACACTGTCGCAGCCCAGCTATGCAGCAAGCATGAGATCGGAAGAGCG	2	3		10	0.500000	0.750000	0.250000	0.750000	0.250000	0.000000	0.375000	0.375000	0.375000	4.216.667	3.466.667	121.635	-0.250000	-0.17524	2	0.00000	1.000.000	1.000.000	1.000.000	1.000.000	1.000.000	1.000.000	1.000.000	-	1	-	1	-	1	-	1	1	-	1	0	0
100189886|F|0-10:A>G-10:A>G	100189886	23793	TGCAGTAATAGGGCCCTCCGGCACACTGTCGCAGCCCAGCTATGCAGCAAGCATGAGATCGGAAGAGCG	TGCAGTAATARGGCCCTYCRGCACACTGTCGCAGCCCAGCTATGCAGCAAGCATGAGATCGGAAGAGCG	2	3	10:A>G	10	0.500000	0.750000	0.250000	0.750000	0.250000	0.000000	0.375000	0.375000	0.375000	4.216.667	3.466.667	121.635	-0.250000	-0.17524	2	0.00000	1.000.000	1.000.000	1.000.000	1.000.000	1.000.000	1.000.000	1.000.000	-	0	-	0	-	0	-	0	0	-	0	1	1
100190029|F|0--8:T>A	100190029	23919	TGCAGTGCTAGTGTCTGTTCTAGACACCAGCATGAGATCGGAAGAGCGGTTCAGCAGGAATGCCGAGAC	TGCAGTGCWAGTGTCTGTTCTAGACACYRGCATGAGATCGGAAGAGCGGTTCAGCAGGAATGCCGAGAC	2	3		8	0.500000	0.750000	0.250000	0.750000	0.250000	0.000000	0.375000	0.375000	0.375000	7.858.333	3.850.000	204.113	-0.250000	-0.19039	2	0.00000	1.000.000	1.000.000	1.000.000	1.000.000	1.000.000	1.000.000	1.000.000	-	1	-	1	-	1	-	1	1	-	1	0	0
100190029|F|0-8:T>A-8:T>A	100190029	23919	TGCAGTGCAAGTGTCTGTTCTAGACACTGGCATGAGATCGGAAGAGCGGTTCAGCAGGAATGCCGAGAC	TGCAGTGCWAGTGTCTGTTCTAGACACYRGCATGAGATCGGAAGAGCGGTTCAGCAGGAATGCCGAGAC	2	3	8:T>A	8	0.500000	0.750000	0.250000	0.750000	0.250000	0.000000	0.375000	0.375000	0.375000	7.858.333	3.850.000	204.113	-0.250000	-0.19039	2	0.00000	1.000.000	1.000.000	1.000.000	1.000.000	1.000.000	1.000.000	1.000.000	-	0	-	0	-	0	-	0	0	-	0	1	1
100190049|F|0--9:G>A	100190049	23934	TGCAGTGGAGGCCTTCTTCCTAGTGCATGAGATCGGAAGAGCGGTTCAGCAGGAATGCCGAGACCGATC	TGCAGTGGARGCCTTCTTCCTRGTGCATGAGATCGGAAGAGCGGTTCAGCAGGAATGCCGAGACCGATC	2	2		9	0.500000	0.750000	0.250000	0.750000	0.250000	0.000000	0.375000	0.375000	0.375000	5.633.333	4.833.333	116.552	-0.250000	-0.18624	2	0.00000	1.000.000	1.000.000	1.000.000	1.000.000	1.000.000	1.000.000	1.000.000	-	1	-	1	-	1	-	1	1	-	1	0	0
100190049|F|0-9:G>A-9:G>A	100190049	23934	TGCAGTGGAAGCCTTCTTCCTGGTGCATGAGATCGGAAGAGCGGTTCAGCAGGAATGCCGAGACCGATC	TGCAGTGGARGCCTTCTTCCTRGTGCATGAGATCGGAAGAGCGGTTCAGCAGGAATGCCGAGACCGATC	2	2	9:G>A	9	0.500000	0.750000	0.250000	0.750000	0.250000	0.000000	0.375000	0.375000	0.375000	5.633.333	4.833.333	116.552	-0.250000	-0.18624	2	0.00000	1.000.000	1.000.000	1.000.000	1.000.000	1.000.000	1.000.000	1.000.000	-	0	-	0	-	0	-	0	0	-	0	1	1
100190061|F|0--8:T>C	100190061	23942	TGCAGTGGTGTACAATATGCATGAGATCGGAAGAGCGGTTCAGCAGGAATGCCGAGACCGATCTCGTAT	TGCAGTGGYGTACAATATGCATGAGATCGGAAGAGCGGTTCAGCAGGAATGCCGAGACCGATCTCGTAT	2	1		8	0.500000	0.750000	0.250000	0.750000	0.250000	0.000000	0.375000	0.375000	0.375000	3.766.667	3.600.000	104.630	-0.250000	-0.17037	2	0.00000	1.000.000	1.000.000	1.000.000	1.000.000	1.000.000	0.000000	0.000000	-	1	-	1	-	1	-	1	1	-	1	0	0
100190061|F|0-8:T>C-8:T>C	100190061	23942	TGCAGTGGCGTACAATATGCATGAGATCGGAAGAGCGGTTCAGCAGGAATGCCGAGACCGATCTCGTAT	TGCAGTGGYGTACAATATGCATGAGATCGGAAGAGCGGTTCAGCAGGAATGCCGAGACCGATCTCGTAT	2	1	8:T>C	8	0.500000	0.750000	0.250000	0.750000	0.250000	0.000000	0.375000	0.375000	0.375000	3.766.667	3.600.000	104.630	-0.250000	-0.17037	2	0.00000	1.000.000	1.000.000	1.000.000	1.000.000	1.000.000	0.000000	0.000000	-	0	-	0	-	0	-	0	0	-	0	1	1
100190077|F|0--18:T>C	100190077	23953	TGCAGTGGTGGTGCTGGATTTGGTGTCAGGTGGCAGCGTAAGGCGGGGCATGAGATCGGAAGAGCGGTT	TGCAGTGGTGGTGCTGGAYTTGGTGTCWGGTGGCAGCGTRAGGCGGGGCATGAGATCGGAAGAGCGGTT	2	3		18	0.500000	0.750000	0.250000	0.750000	0.250000	0.000000	0.375000	0.375000	0.375000	4.766.667	1.300.000	366.667	-0.250000	-0.15870	2	0.00000	1.000.000	1.000.000	1.000.000	1.000.000	1.000.000	0.000000	0.000000	-	1	-	1	-	1	-	1	1	-	1	0	0
100190077|F|0-18:T>C-18:T>C	100190077	23953	TGCAGTGGTGGTGCTGGACTTGGTGTCTGGTGGCAGCGTGAGGCGGGGCATGAGATCGGAAGAGCGGTT	TGCAGTGGTGGTGCTGGAYTTGGTGTCWGGTGGCAGCGTRAGGCGGGGCATGAGATCGGAAGAGCGGTT	2	3	18:T>C	18	0.500000	0.750000	0.250000	0.750000	0.250000	0.000000	0.375000	0.375000	0.375000	4.766.667	1.300.000	366.667	-0.250000	-0.15870	2	0.00000	1.000.000	1.000.000	1.000.000	1.000.000	1.000.000	0.000000	0.000000	-	0	-	0	-	0	-	0	0	-	0	1	1
100190083|F|0--11:C>T	100190083	23957	TGCAGTGGTTCCTGGAGGAGGGGAAAAAGGAGTGTTTTGCAGCATGAGATCGGAAGAGCGGTTCAGCAG	TGCAGTGGTTCYTGGAGGAGGGSAAAAAGGAGTGTTTTGCWGCATGAGATCGGAAGAGCGGTTCAGCAG	2	3		11	0.500000	0.750000	0.250000	0.750000	0.250000	0.000000	0.375000	0.375000	0.375000	7.025.000	4.200.000	167.262	-0.250000	-0.18678	2	0.00000	1.000.000	1.000.000	1.000.000	1.000.000	1.000.000	1.000.000	1.000.000	-	1	-	1	-	1	-	1	1	-	1	0	0
100190083|F|0-11:C>T-11:C>T	100190083	23957	TGCAGTGGTTCTTGGAGGAGGGCAAAAAGGAGTGTTTTGCTGCATGAGATCGGAAGAGCGGTTCAGCAG	TGCAGTGGTTCYTGGAGGAGGGSAAAAAGGAGTGTTTTGCWGCATGAGATCGGAAGAGCGGTTCAGCAG	2	3	11:C>T	11	0.500000	0.750000	0.250000	0.750000	0.250000	0.000000	0.375000	0.375000	0.375000	7.025.000	4.200.000	167.262	-0.250000	-0.18678	2	0.00000	1.000.000	1.000.000	1.000.000	1.000.000	1.000.000	1.000.000	1.000.000	-	0	-	0	-	0	-	0	0	-	0	1	1
100190102|F|0--15:T>C	100190102	23972	TGCAGTGTCGTCATGTTTGAATAATGCAAGCATGAGATCGGAAGAGCGGTTCAGCAGGAATGCCGAGAC	TGCAGTGTCGTCATGYTTGAATAATGCAAGCATGAGATCGGAAGAGCGGTTCAGCAGGAATGCCGAGAC	2	1		15	0.562500	0.888889	0.111111	0.888889	0.111111	0.000000	0.197531	0.197531	0.197531	6.937.500	4.800.000	144.531	-0.111111	-0.15525	2	0.00000	1.000.000	1.000.000	1.000.000	1.000.000	1.000.000	1.000.000	1.000.000	-	1	-	1	-	1	-	1	1	0	1	1	1
100190102|F|0-15:T>C-15:T>C	100190102	23972	TGCAGTGTCGTCATGCTTGAATAATGCAAGCATGAGATCGGAAGAGCGGTTCAGCAGGAATGCCGAGAC	TGCAGTGTCGTCATGYTTGAATAATGCAAGCATGAGATCGGAAGAGCGGTTCAGCAGGAATGCCGAGAC	2	1	15:T>C	15	0.562500	0.888889	0.111111	0.888889	0.111111	0.000000	0.197531	0.197531	0.197531	6.937.500	4.800.000	144.531	-0.111111	-0.15525	2	0.00000	1.000.000	1.000.000	1.000.000	1.000.000	1.000.000	1.000.000	1.000.000	-	0	-	0	-	0	-	0	0	1	0	0	0
100190130|F|0--9:G>A	100190130	23994	TGCAGTTACGTTTTATTACCGATGTGCATGAGATCGGAAGAGCGGTTCAGCAGGAATGCCGAGACCGAT	TGCAGTTACRTTTTATTACCGATGTGCATGAGATCGGAAGAGCGGTTCAGCAGGAATGCCGAGACCGAT	2	1		9	0.562500	0.666667	0.333333	0.666667	0.333333	0.000000	0.444444	0.444444	0.444444	8.916.667	4.140.000	215.378	-0.333333	-0.23641	2	0.00000	1.000.000	1.000.000	1.000.000	1.000.000	1.000.000	2.000.000	2.000.000	-	1	-	1	-	1	-	1	1	0	1	0	0
100190130|F|0-9:G>A-9:G>A	100190130	23994	TGCAGTTACATTTTATTACCGATGTGCATGAGATCGGAAGAGCGGTTCAGCAGGAATGCCGAGACCGAT	TGCAGTTACRTTTTATTACCGATGTGCATGAGATCGGAAGAGCGGTTCAGCAGGAATGCCGAGACCGAT	2	1	9:G>A	9	0.562500	0.666667	0.333333	0.666667	0.333333	0.000000	0.444444	0.444444	0.444444	8.916.667	4.140.000	215.378	-0.333333	-0.23641	2	0.00000	1.000.000	1.000.000	1.000.000	1.000.000	1.000.000	2.000.000	2.000.000	-	0	-	0	-	0	-	0	0	1	0	1	1
100190176|F|0--9:C>G	100190176	24031	TGCAGTTTACAATGTCCTCATTTACACCTTAATGGACACATTAGCATGAGATCGGAAGAGCGGTTCAGC	TGCAGTTTASAATRTCCTCATTTACACSTTAATGGACACATTAGCATGAGATCGGAAGAGCGGTTCAGC	2	3		9	0.437500	0.857143	0.142857	0.857143	0.142857	0.000000	0.244898	0.244898	0.244898	9.075.000	4.300.000	211.047	-0.142857	-0.13394	2	0.00000	1.000.000	1.000.000	1.000.000	1.000.000	1.000.000	1.000.000	1.000.000	-	1	-	1	-	-	-	-	1	0	1	1	1
100190176|F|0-9:C>G-9:C>G	100190176	24031	TGCAGTTTAGAATATCCTCATTTACACGTTAATGGACACATTAGCATGAGATCGGAAGAGCGGTTCAGC	TGCAGTTTASAATRTCCTCATTTACACSTTAATGGACACATTAGCATGAGATCGGAAGAGCGGTTCAGC	2	3	9:C>G	9	0.437500	0.857143	0.142857	0.857143	0.142857	0.000000	0.244898	0.244898	0.244898	9.075.000	4.300.000	211.047	-0.142857	-0.13394	2	0.00000	1.000.000	1.000.000	1.000.000	1.000.000	1.000.000	1.000.000	1.000.000	-	0	-	0	-	-	-	-	0	1	0	0	0
100191824|F|0--6:T>C	100191824	25535	TGCAGGTCTGAAGGTGGCCGTCAGCATGAGATCGGAAGAGCGGTTCAGCAGGAATGCCGAGACCGATCT	TGCAGGYMTGAAGGTGGCCGTCWGCATGAGATCGGAAGAGCGGTTCAGCAGGAATGCCGAGACCGATCT	2	3		6	0.500000	0.750000	0.250000	0.750000	0.250000	0.000000	0.375000	0.375000	0.375000	7.091.667	6.925.000	102.407	-0.250000	-0.26355	2	0.00000	1.000.000	1.000.000	1.000.000	1.000.000	1.000.000	2.000.000	2.000.000	-	1	-	1	0	1	0	1	1	-	1	-	-
100191824|F|0-6:T>C-6:T>C	100191824	25535	TGCAGGCATGAAGGTGGCCGTCTGCATGAGATCGGAAGAGCGGTTCAGCAGGAATGCCGAGACCGATCT	TGCAGGYMTGAAGGTGGCCGTCWGCATGAGATCGGAAGAGCGGTTCAGCAGGAATGCCGAGACCGATCT	2	3	6:T>C	6	0.500000	0.750000	0.250000	0.750000	0.250000	0.000000	0.375000	0.375000	0.375000	7.091.667	6.925.000	102.407	-0.250000	-0.26355	2	0.00000	1.000.000	1.000.000	1.000.000	1.000.000	1.000.000	2.000.000	2.000.000	-	0	-	0	1	0	1	0	0	-	0	-	-
100191858|F|0--7:G>C	100191858	25563	TGCAGGCGCTGCATGGCAGGCATGAGATCGGAAGAGCGGTTCAGCAGGAATGCCGAGACCGATCTCGTA	TGCAGGCSCTGCAWGGYAGGCATGAGATCGGAAGAGCGGTTCAGCAGGAATGCCGAGACCGATCTCGTA	2	3		7	0.625000	0.400000	0.600000	0.400000	0.600000	0.000000	0.480000	0.480000	0.480000	7.912.500	4.558.333	173.583	-0.400000	-0.39495	2	0.00000	1.000.000	1.000.000	1.000.000	1.000.000	1.000.000	4.000.000	4.000.000	1	0	1	0	1	0	1	0	0	-	0	-	-
100191858|F|0-7:G>C-7:G>C	100191858	25563	TGCAGGCCCTGCAAGGTAGGCATGAGATCGGAAGAGCGGTTCAGCAGGAATGCCGAGACCGATCTCGTA	TGCAGGCSCTGCAWGGYAGGCATGAGATCGGAAGAGCGGTTCAGCAGGAATGCCGAGACCGATCTCGTA	2	3	7:G>C	7	0.625000	0.400000	0.600000	0.400000	0.600000	0.000000	0.480000	0.480000	0.480000	7.912.500	4.558.333	173.583	-0.400000	-0.39495	2	0.00000	1.000.000	1.000.000	1.000.000	1.000.000	1.000.000	4.000.000	4.000.000	0	1	0	1	0	1	0	1	1	-	1	-	-
100192536|F|0--7:T>C	100192536	26160	TGCAGTTTCATGCCGTCCAGAGTAAAGGCATGAGATCGGAAGAGCGGTTCAGCAGGAATGCCGAGACCG	TGCAGTTYCATGCCGTCCAGAGYAARGGCATGAGATCGGAAGAGCGGTTCAGCAGGAATGCCGAGACCG	2	3		7	0.625000	0.600000	0.400000	0.600000	0.400000	0.000000	0.480000	0.480000	0.480000	6.083.333	4.337.500	140.250	-0.400000	-0.41145	2	0.00000	1.000.000	1.000.000	1.000.000	1.000.000	1.000.000	4.000.000	4.000.000	0	1	0	1	0	1	0	1	1	-	1	-	-
100192536|F|0-7:T>C-7:T>C	100192536	26160	TGCAGTTCCATGCCGTCCAGAGCAAGGGCATGAGATCGGAAGAGCGGTTCAGCAGGAATGCCGAGACCG	TGCAGTTYCATGCCGTCCAGAGYAARGGCATGAGATCGGAAGAGCGGTTCAGCAGGAATGCCGAGACCG	2	3	7:T>C	7	0.625000	0.600000	0.400000	0.600000	0.400000	0.000000	0.480000	0.480000	0.480000	6.083.333	4.337.500	140.250	-0.400000	-0.41145	2	0.00000	1.000.000	1.000.000	1.000.000	1.000.000	1.000.000	4.000.000	4.000.000	1	0	1	0	1	0	1	0	0	-	0	-	-
100192806|F|0--18:G>A	100192806	26394	TGCAGAACCCAGCAAAATGTGACTTCTGAAAGGTTCTGTAGAGATGAGGAAGCATGAGATCGGAAGAGC	TGCAGAACCCAGCAAAATRKGACTTCTGRAAGGTTCTGTAGAGATGAGGAAGCATGAGATCGGAAGAGC	2	3		18	0.437500	0.857143	0.142857	0.857143	0.142857	0.000000	0.244898	0.244898	0.244898	1.708.333	1.450.000	117.816	-0.142857	-0.13546	2	0.00000	1.000.000	1.000.000	1.000.000	1.000.000	1.000.000	1.000.000	1.000.000	-	1	-	1	-	1	-	1	1	0	1	-	-
100192806|F|0-18:G>A-18:G>A	100192806	26394	TGCAGAACCCAGCAAAATAGGACTTCTGGAAGGTTCTGTAGAGATGAGGAAGCATGAGATCGGAAGAGC	TGCAGAACCCAGCAAAATRKGACTTCTGRAAGGTTCTGTAGAGATGAGGAAGCATGAGATCGGAAGAGC	2	3	18:G>A	18	0.437500	0.857143	0.142857	0.857143	0.142857	0.000000	0.244898	0.244898	0.244898	1.708.333	1.450.000	117.816	-0.142857	-0.13546	2	0.00000	1.000.000	1.000.000	1.000.000	1.000.000	1.000.000	1.000.000	1.000.000	-	0	-	0	-	0	-	0	0	1	0	-	-
100193105|F|0--9:C>G	100193105	26645	TGCAGACCACGTAAAGGCATGAGATCGGAAGAGCGGTTCAGCAGGAATGCCGAGACCGATCTCGTATGC	TGCAGACCASGTAAAGGCATGAGATCGGAAGAGCGGTTCAGCAGGAATGCCGAGACCGATCTCGTATGC	2	1		9	0.500000	0.250000	0.750000	0.250000	0.750000	0.000000	0.375000	0.375000	0.375000	7.750.000	3.725.000	208.054	-0.250000	-0.25356	2	0.00000	1.000.000	1.000.000	1.000.000	1.000.000	1.000.000	2.000.000	2.000.000	1	0	1	0	-	0	-	0	0	-	0	-	-
100193105|F|0-9:C>G-9:C>G	100193105	26645	TGCAGACCAGGTAAAGGCATGAGATCGGAAGAGCGGTTCAGCAGGAATGCCGAGACCGATCTCGTATGC	TGCAGACCASGTAAAGGCATGAGATCGGAAGAGCGGTTCAGCAGGAATGCCGAGACCGATCTCGTATGC	2	1	9:C>G	9	0.500000	0.250000	0.750000	0.250000	0.750000	0.000000	0.375000	0.375000	0.375000	7.750.000	3.725.000	208.054	-0.250000	-0.25356	2	0.00000	1.000.000	1.000.000	1.000.000	1.000.000	1.000.000	2.000.000	2.000.000	0	1	0	1	-	1	-	1	1	-	1	-	-
100193160|F|0--5:T>A	100193160	26691	TGCAGTCAGACCCCAAAGGCATGAGATCGGAAGAGCGGTTCAGCAGGAATGCCGAGACCGATCTCGTAT	TGCAGWCRGACCCCAARGGCATGAGATCGGAAGAGCGGTTCAGCAGGAATGCCGAGACCGATCTCGTAT	2	3		5	0.437500	0.142857	0.857143	0.142857	0.857143	0.000000	0.244898	0.244898	0.244898	4.150.000	3.250.000	127.692	-0.142857	-0.13332	2	0.00000	1.000.000	1.000.000	1.000.000	1.000.000	1.000.000	1.000.000	1.000.000	-	0	-	0	-	0	-	0	0	1	0	-	-
100193160|F|0-5:T>A-5:T>A	100193160	26691	TGCAGACGGACCCCAAGGGCATGAGATCGGAAGAGCGGTTCAGCAGGAATGCCGAGACCGATCTCGTAT	TGCAGWCRGACCCCAARGGCATGAGATCGGAAGAGCGGTTCAGCAGGAATGCCGAGACCGATCTCGTAT	2	3	5:T>A	5	0.437500	0.142857	0.857143	0.142857	0.857143	0.000000	0.244898	0.244898	0.244898	4.150.000	3.250.000	127.692	-0.142857	-0.13332	2	0.00000	1.000.000	1.000.000	1.000.000	1.000.000	1.000.000	1.000.000	1.000.000	-	1	-	1	-	1	-	1	1	0	1	-	-
100193541|F|0--32:A>G	100193541	27000	TGCAGAGTTTTGCTGACCACTGGCATAGCTCCACTGTCCAGCTGCATGAGATCGGAAGAGCGGTTCAGC	TGCAGAGTTTTGCTGACCACTGGCATAGCTCCRCTGTCCAGCTGCATGAGATCGGAAGAGCGGTTCAGC	2	1		32	0.437500	0.571429	0.428571	0.571429	0.428571	0.000000	0.489796	0.489796	0.489796	2.925.000	1.460.000	200.342	-0.428571	-0.15968	2	0.00000	1.000.000	1.000.000	1.000.000	1.000.000	1.000.000	2.000.000	2.000.000	0	1	-	1	-	0	-	0	1	-	1	-	-
100193541|F|0-32:A>G-32:A>G	100193541	27000	TGCAGAGTTTTGCTGACCACTGGCATAGCTCCGCTGTCCAGCTGCATGAGATCGGAAGAGCGGTTCAGC	TGCAGAGTTTTGCTGACCACTGGCATAGCTCCRCTGTCCAGCTGCATGAGATCGGAAGAGCGGTTCAGC	2	1	32:A>G	32	0.437500	0.571429	0.428571	0.571429	0.428571	0.000000	0.489796	0.489796	0.489796	2.925.000	1.460.000	200.342	-0.428571	-0.15968	2	0.00000	1.000.000	1.000.000	1.000.000	1.000.000	1.000.000	2.000.000	2.000.000	1	0	-	0	-	1	-	1	0	-	0	-	-
100193693|F|0--15:A>G	100193693	27125	TGCAGATGGTCCAAAACACTGCTGCATGAGATCGGAAGAGCGGTTCAGCAGGAATGCCGAGACCGATCT	TGCAGATGGTCCAAARCACTGCTGCATGAGATCGGAAGAGCGGTTCAGCAGGAATGCCGAGACCGATCT	2	1		15	0.437500	0.714286	0.285714	0.714286	0.285714	0.000000	0.408163	0.408163	0.408163	7.188.889	6.700.000	107.297	-0.285714	-0.19087	2	0.00000	1.000.000	1.000.000	1.000.000	1.000.000	1.000.000	2.000.000	2.000.000	-	1	-	1	-	1	-	1	0	1	0	-	-
100193693|F|0-15:A>G-15:A>G	100193693	27125	TGCAGATGGTCCAAAGCACTGCTGCATGAGATCGGAAGAGCGGTTCAGCAGGAATGCCGAGACCGATCT	TGCAGATGGTCCAAARCACTGCTGCATGAGATCGGAAGAGCGGTTCAGCAGGAATGCCGAGACCGATCT	2	1	15:A>G	15	0.437500	0.714286	0.285714	0.714286	0.285714	0.000000	0.408163	0.408163	0.408163	7.188.889	6.700.000	107.297	-0.285714	-0.19087	2	0.00000	1.000.000	1.000.000	1.000.000	1.000.000	1.000.000	2.000.000	2.000.000	-	0	-	0	-	0	-	0	1	0	1	-	-
100193901|F|0--20:A>G	100193901	27298	TGCAGCACCTTGATCATGGCATCTTTCTCGATGATCTGCGCATGAGATCGGAAGAGCGGTTCAGCAGGA	TGCAGCACCTTGATCATGGCRTCYTTCTCGATGATCTGSGCATGAGATCGGAAGAGCGGTTCAGCAGGA	2	3		20	0.500000	0.250000	0.750000	0.250000	0.750000	0.000000	0.375000	0.375000	0.375000	8.050.000	5.575.000	144.395	-0.250000	-0.26760	2	0.00000	1.000.000	1.000.000	1.000.000	1.000.000	1.000.000	2.000.000	2.000.000	1	0	1	0	-	0	-	0	0	-	0	-	-
100193901|F|0-20:A>G-20:A>G	100193901	27298	TGCAGCACCTTGATCATGGCGTCCTTCTCGATGATCTGGGCATGAGATCGGAAGAGCGGTTCAGCAGGA	TGCAGCACCTTGATCATGGCRTCYTTCTCGATGATCTGSGCATGAGATCGGAAGAGCGGTTCAGCAGGA	2	3	20:A>G	20	0.500000	0.250000	0.750000	0.250000	0.750000	0.000000	0.375000	0.375000	0.375000	8.050.000	5.575.000	144.395	-0.250000	-0.26760	2	0.00000	1.000.000	1.000.000	1.000.000	1.000.000	1.000.000	2.000.000	2.000.000	0	1	0	1	-	1	-	1	1	-	1	-	-
100194041|F|0--26:G>A	100194041	27420	TGCAGCAGGTTGTACTTCTTCCTGGCGGCTGCCTCCCGCTTTTGCCGCAGCAGCCGCATGAGATCGGAA	TGCAGCAGGTTGTACTTCTTCCTGGCRGCTGCCTCCCGCTTYTGYCGCAGCAGCCGCATGAGATCGGAA	2	3		26	0.437500	0.142857	0.857143	0.142857	0.857143	0.000000	0.244898	0.244898	0.244898	1.500.000	1.366.667	109.756	-0.142857	-0.11690	2	0.00000	1.000.000	1.000.000	1.000.000	1.000.000	1.000.000	0.000000	0.000000	-	0	-	0	-	0	-	0	0	1	0	-	-
100194041|F|0-26:G>A-26:G>A	100194041	27420	TGCAGCAGGTTGTACTTCTTCCTGGCAGCTGCCTCCCGCTTCTGTCGCAGCAGCCGCATGAGATCGGAA	TGCAGCAGGTTGTACTTCTTCCTGGCRGCTGCCTCCCGCTTYTGYCGCAGCAGCCGCATGAGATCGGAA	2	3	26:G>A	26	0.437500	0.142857	0.857143	0.142857	0.857143	0.000000	0.244898	0.244898	0.244898	1.500.000	1.366.667	109.756	-0.142857	-0.11690	2	0.00000	1.000.000	1.000.000	1.000.000	1.000.000	1.000.000	0.000000	0.000000	-	1	-	1	-	1	-	1	1	0	1	-	-
100194312|F|0--6:T>C	100194312	27643	TGCAGCTCTGTCCGACAGCGTGGCCAAGGAGAGCTGCATGAGATCGGAAGAGCGGTTCAGCAGGAATGC	TGCAGCYCTGTCYGACAGYGTGGCCAAGGAGAGCTGCATGAGATCGGAAGAGCGGTTCAGCAGGAATGC	2	3		6	0.500000	0.250000	0.750000	0.250000	0.750000	0.000000	0.375000	0.375000	0.375000	7.075.000	6.191.667	114.266	-0.250000	-0.26317	2	0.00000	1.000.000	1.000.000	1.000.000	1.000.000	1.000.000	2.000.000	2.000.000	-	0	-	0	-	0	-	0	0	-	0	-	-
100194312|F|0-6:T>C-6:T>C	100194312	27643	TGCAGCCCTGTCTGACAGTGTGGCCAAGGAGAGCTGCATGAGATCGGAAGAGCGGTTCAGCAGGAATGC	TGCAGCYCTGTCYGACAGYGTGGCCAAGGAGAGCTGCATGAGATCGGAAGAGCGGTTCAGCAGGAATGC	2	3	6:T>C	6	0.500000	0.250000	0.750000	0.250000	0.750000	0.000000	0.375000	0.375000	0.375000	7.075.000	6.191.667	114.266	-0.250000	-0.26317	2	0.00000	1.000.000	1.000.000	1.000.000	1.000.000	1.000.000	2.000.000	2.000.000	-	1	-	1	-	1	-	1	1	-	1	-	-
100194402|F|0--14:A>G	100194402	27717	TGCAGCCTGGCACTAAGTGCAGTAGTCGCATGAGATCGGAAGAGCGGTTCAGCAGGAATGCCGAGACCG	TGCAGCCTGGCACTRARYGCAGTAGTCGCATGAGATCGGAAGAGCGGTTCAGCAGGAATGCCGAGACCG	2	3		14	0.437500	0.857143	0.142857	0.857143	0.142857	0.000000	0.244898	0.244898	0.244898	3.266.667	2.600.000	125.641	-0.142857	-0.12943	2	0.00000	1.000.000	1.000.000	1.000.000	1.000.000	1.000.000	1.000.000	1.000.000	-	1	-	1	-	1	-	1	1	0	1	-	-
100194402|F|0-14:A>G-14:A>G	100194402	27717	TGCAGCCTGGCACTGAACGCAGTAGTCGCATGAGATCGGAAGAGCGGTTCAGCAGGAATGCCGAGACCG	TGCAGCCTGGCACTRARYGCAGTAGTCGCATGAGATCGGAAGAGCGGTTCAGCAGGAATGCCGAGACCG	2	3	14:A>G	14	0.437500	0.857143	0.142857	0.857143	0.142857	0.000000	0.244898	0.244898	0.244898	3.266.667	2.600.000	125.641	-0.142857	-0.12943	2	0.00000	1.000.000	1.000.000	1.000.000	1.000.000	1.000.000	1.000.000	1.000.000	-	0	-	0	-	0	-	0	0	1	0	-	-
100194410|F|0--5:C>T	100194410	27723	TGCAGCCTGGTCCTCACCTGCTGGCCAGCATGAGATCGGAAGAGCGGTTCAGCAGGAATGCCGAGACCG	TGCAGYCTGGYCCTCACCTKCTGGCCAGCATGAGATCGGAAGAGCGGTTCAGCAGGAATGCCGAGACCG	2	3		5	0.500000	0.750000	0.250000	0.750000	0.250000	0.000000	0.375000	0.375000	0.375000	8.950.000	8.550.000	104.678	-0.250000	-0.26910	2	0.00000	1.000.000	1.000.000	1.000.000	1.000.000	1.000.000	2.000.000	2.000.000	0	1	0	1	-	1	-	1	1	-	1	-	-
100194410|F|0-5:C>T-5:C>T	100194410	27723	TGCAGTCTGGCCCTCACCTTCTGGCCAGCATGAGATCGGAAGAGCGGTTCAGCAGGAATGCCGAGACCG	TGCAGYCTGGYCCTCACCTKCTGGCCAGCATGAGATCGGAAGAGCGGTTCAGCAGGAATGCCGAGACCG	2	3	5:C>T	5	0.500000	0.750000	0.250000	0.750000	0.250000	0.000000	0.375000	0.375000	0.375000	8.950.000	8.550.000	104.678	-0.250000	-0.26910	2	0.00000	1.000.000	1.000.000	1.000.000	1.000.000	1.000.000	2.000.000	2.000.000	1	0	1	0	-	0	-	0	0	-	0	-	-
100194417|F|0--8:G>A	100194417	27727	TGCAGCCTGTATTCTCTGTATCCAAGTCCAGTGGGGGACAATGGTCTCTGGGCATGAGATCGGAAGAGC	TGCAGCCTRTATTCTCTGTATCCAAGYCCAGTGGGGGACAAKGGTCTCTGGGCATGAGATCGGAAGAGC	2	3		8	0.437500	0.857143	0.142857	0.857143	0.142857	0.000000	0.244898	0.244898	0.244898	1.283.333	400.000	320.833	-0.142857	-0.17676	2	0.00000	1.000.000	1.000.000	1.000.000	1.000.000	1.000.000	1.000.000	1.000.000	-	1	-	1	-	1	-	1	1	0	1	-	-
100194417|F|0-8:G>A-8:G>A	100194417	27727	TGCAGCCTATATTCTCTGTATCCAAGCCCAGTGGGGGACAAGGGTCTCTGGGCATGAGATCGGAAGAGC	TGCAGCCTRTATTCTCTGTATCCAAGYCCAGTGGGGGACAAKGGTCTCTGGGCATGAGATCGGAAGAGC	2	3	8:G>A	8	0.437500	0.857143	0.142857	0.857143	0.142857	0.000000	0.244898	0.244898	0.244898	1.283.333	400.000	320.833	-0.142857	-0.17676	2	0.00000	1.000.000	1.000.000	1.000.000	1.000.000	1.000.000	1.000.000	1.000.000	-	0	-	0	-	0	-	0	0	1	0	-	-
100194519|F|0--5:C>T	100194519	27810	TGCAGCGTAATGGCAGGGGGCTCCCTGACTGGTTGGCATGAGATCGGAAGAGCGGTTCAGCAGGAATGC	TGCAGYGTAATGGCAGGGGGYTCCCKGACTGGTTGGCATGAGATCGGAAGAGCGGTTCAGCAGGAATGC	2	3		5	0.437500	0.857143	0.142857	0.857143	0.142857	0.000000	0.244898	0.244898	0.244898	4.008.333	3.800.000	105.482	-0.142857	-0.13933	2	0.00000	1.000.000	1.000.000	1.000.000	1.000.000	1.000.000	1.000.000	1.000.000	-	1	-	1	-	1	-	1	1	0	1	-	-
100194519|F|0-5:C>T-5:C>T	100194519	27810	TGCAGTGTAATGGCAGGGGGTTCCCGGACTGGTTGGCATGAGATCGGAAGAGCGGTTCAGCAGGAATGC	TGCAGYGTAATGGCAGGGGGYTCCCKGACTGGTTGGCATGAGATCGGAAGAGCGGTTCAGCAGGAATGC	2	3	5:C>T	5	0.437500	0.857143	0.142857	0.857143	0.142857	0.000000	0.244898	0.244898	0.244898	4.008.333	3.800.000	105.482	-0.142857	-0.13933	2	0.00000	1.000.000	1.000.000	1.000.000	1.000.000	1.000.000	1.000.000	1.000.000	-	0	-	0	-	0	-	0	0	1	0	-	-
100194537|F|0--17:A>C	100194537	27824	TGCAGCGTGAGGTGGAGAGGCTGGGAGCCGAAAACGCCGGCATGAGATCGGAAGAGCGGTTCAGCAGGA	TGCAGCGTGAGGTGGAGMGGCTGGGAGCCGAAAACGCCGGCATGAGATCGGAAGAGCGGTTCAGCAGGA	2	1		17	0.437500	0.285714	0.714286	0.285714	0.714286	0.000000	0.408163	0.408163	0.408163	7.750.000	3.611.111	214.615	-0.285714	-0.18725	2	0.00000	1.000.000	1.000.000	1.000.000	1.000.000	1.000.000	2.000.000	2.000.000	-	0	-	0	-	0	-	0	1	-	1	-	-
100194537|F|0-17:A>C-17:A>C	100194537	27824	TGCAGCGTGAGGTGGAGCGGCTGGGAGCCGAAAACGCCGGCATGAGATCGGAAGAGCGGTTCAGCAGGA	TGCAGCGTGAGGTGGAGMGGCTGGGAGCCGAAAACGCCGGCATGAGATCGGAAGAGCGGTTCAGCAGGA	2	1	17:A>C	17	0.437500	0.285714	0.714286	0.285714	0.714286	0.000000	0.408163	0.408163	0.408163	7.750.000	3.611.111	214.615	-0.285714	-0.18725	2	0.00000	1.000.000	1.000.000	1.000.000	1.000.000	1.000.000	2.000.000	2.000.000	-	1	-	1	-	1	-	1	0	-	0	-	-
100194623|F|0--12:C>T	100194623	27894	TGCAGCTCACTGCCGGCTGCTGTCCGTGACCTTCTTGTTGCATGAGATCGGAAGAGCGGTTCAGCAGGA	TGCAGCTCACTGYCRGCTGCTGTCCGTGACCTTCTTGTTGCATGAGATCGGAAGAGCGGTTCAGCAGGA	2	2		12	0.437500	0.571429	0.428571	0.571429	0.428571	0.000000	0.489796	0.489796	0.489796	6.162.500	1.780.000	346.208	-0.428571	-0.16531	2	0.00000	1.000.000	1.000.000	1.000.000	1.000.000	1.000.000	2.000.000	2.000.000	-	1	-	1	-	0	-	0	1	0	1	-	-
100194623|F|0-12:C>T-12:C>T	100194623	27894	TGCAGCTCACTGTCAGCTGCTGTCCGTGACCTTCTTGTTGCATGAGATCGGAAGAGCGGTTCAGCAGGA	TGCAGCTCACTGYCRGCTGCTGTCCGTGACCTTCTTGTTGCATGAGATCGGAAGAGCGGTTCAGCAGGA	2	2	12:C>T	12	0.437500	0.571429	0.428571	0.571429	0.428571	0.000000	0.489796	0.489796	0.489796	6.162.500	1.780.000	346.208	-0.428571	-0.16531	2	0.00000	1.000.000	1.000.000	1.000.000	1.000.000	1.000.000	2.000.000	2.000.000	-	0	-	0	-	1	-	1	0	1	0	-	-
100194638|F|0--8:A>G	100194638	27905	TGCAGCTCAGGATTCATATGAATTCCAGCCACACTCACGCATGAGATCGGAAGAGCGGTTCAGCAGGAA	TGCAGCTCRGGATTCATATGAATTCCAKCCACACTCACGCATGAGATCGGAAGAGCGGTTCAGCAGGAA	2	2		8	0.437500	0.857143	0.142857	0.857143	0.142857	0.000000	0.244898	0.244898	0.244898	5.075.000	4.050.000	125.309	-0.142857	-0.13887	2	0.00000	1.000.000	1.000.000	1.000.000	1.000.000	1.000.000	1.000.000	1.000.000	-	1	-	1	-	1	-	1	1	0	1	-	-
100194638|F|0-8:A>G-8:A>G	100194638	27905	TGCAGCTCGGGATTCATATGAATTCCATCCACACTCACGCATGAGATCGGAAGAGCGGTTCAGCAGGAA	TGCAGCTCRGGATTCATATGAATTCCAKCCACACTCACGCATGAGATCGGAAGAGCGGTTCAGCAGGAA	2	2	8:A>G	8	0.437500	0.857143	0.142857	0.857143	0.142857	0.000000	0.244898	0.244898	0.244898	5.075.000	4.050.000	125.309	-0.142857	-0.13887	2	0.00000	1.000.000	1.000.000	1.000.000	1.000.000	1.000.000	1.000.000	1.000.000	-	0	-	0	-	0	-	0	0	1	0	-	-
100194801|F|0--29:G>A	100194801	28031	TGCAGCTGGCGTAGCAGAGAACTGTAGCCGGGCGAGCGTGACGCATGAGATCGGAAGAGCGGTTCAGCA	TGCAGCTGGCGTAGCAGAGAACTGTAGCCRGGCGAGCGTGACGCATGAGATCGGAAGAGCGGTTCAGCA	2	1		29	0.437500	0.571429	0.428571	0.571429	0.428571	0.000000	0.489796	0.489796	0.489796	3.975.000	2.120.000	187.500	-0.428571	-0.16624	2	0.00000	1.000.000	1.000.000	1.000.000	1.000.000	1.000.000	2.000.000	2.000.000	-	1	-	1	-	0	-	0	1	-	1	0	-
100194801|F|0-29:G>A-29:G>A	100194801	28031	TGCAGCTGGCGTAGCAGAGAACTGTAGCCAGGCGAGCGTGACGCATGAGATCGGAAGAGCGGTTCAGCA	TGCAGCTGGCGTAGCAGAGAACTGTAGCCRGGCGAGCGTGACGCATGAGATCGGAAGAGCGGTTCAGCA	2	1	29:G>A	29	0.437500	0.571429	0.428571	0.571429	0.428571	0.000000	0.489796	0.489796	0.489796	3.975.000	2.120.000	187.500	-0.428571	-0.16624	2	0.00000	1.000.000	1.000.000	1.000.000	1.000.000	1.000.000	2.000.000	2.000.000	-	0	-	0	-	1	-	1	0	-	0	1	-
100194807|F|0--5:C>T	100194807	28036	TGCAGCTGGTCCTGCTGCTGTCGCATGAGATCGGAAGAGCGGTTCAGCAGGAATGCCGAGACCGATCTC	TGCAGYTGSTCCTGCTGCTGTCGCATGAGATCGGAAGAGCGGTTCAGCAGGAATGCCGAGACCGATCTC	2	2		5	0.437500	0.857143	0.142857	0.857143	0.142857	0.000000	0.244898	0.244898	0.244898	2.741.667	700.000	391.667	-0.142857	-0.11798	2	0.00000	1.000.000	1.000.000	1.000.000	1.000.000	1.000.000	0.000000	0.000000	-	1	-	1	-	1	-	1	1	-	1	0	-
100194807|F|0-5:C>T-5:C>T	100194807	28036	TGCAGTTGCTCCTGCTGCTGTCGCATGAGATCGGAAGAGCGGTTCAGCAGGAATGCCGAGACCGATCTC	TGCAGYTGSTCCTGCTGCTGTCGCATGAGATCGGAAGAGCGGTTCAGCAGGAATGCCGAGACCGATCTC	2	2	5:C>T	5	0.437500	0.857143	0.142857	0.857143	0.142857	0.000000	0.244898	0.244898	0.244898	2.741.667	700.000	391.667	-0.142857	-0.11798	2	0.00000	1.000.000	1.000.000	1.000.000	1.000.000	1.000.000	0.000000	0.000000	-	0	-	0	-	0	-	0	0	-	0	1	-
100194836|F|0--13:C>T	100194836	28058	TGCAGCTGTCGTCCTTGAGAGAACCCCTGCCTGGCATGAGATCGGAAGAGCGGTTCAGCAGGAATGCCG	TGCAGCTGTCGTCYTTGAGAGAACCCCTGCCTGGCATGAGATCGGAAGAGCGGTTCAGCAGGAATGCCG	2	1		13	0.437500	0.571429	0.428571	0.571429	0.428571	0.000000	0.489796	0.489796	0.489796	4.087.500	1.700.000	240.441	-0.428571	-0.17019	2	0.00000	1.000.000	1.000.000	1.000.000	1.000.000	1.000.000	2.000.000	2.000.000	-	1	-	1	-	0	-	0	1	0	1	-	-
100194836|F|0-13:C>T-13:C>T	100194836	28058	TGCAGCTGTCGTCTTTGAGAGAACCCCTGCCTGGCATGAGATCGGAAGAGCGGTTCAGCAGGAATGCCG	TGCAGCTGTCGTCYTTGAGAGAACCCCTGCCTGGCATGAGATCGGAAGAGCGGTTCAGCAGGAATGCCG	2	1	13:C>T	13	0.437500	0.571429	0.428571	0.571429	0.428571	0.000000	0.489796	0.489796	0.489796	4.087.500	1.700.000	240.441	-0.428571	-0.17019	2	0.00000	1.000.000	1.000.000	1.000.000	1.000.000	1.000.000	2.000.000	2.000.000	-	0	-	0	-	1	-	1	0	1	0	-	-
100194976|F|0--12:G>A	100194976	28176	TGCAGGAAGAGCGGATCCAGAATGCATGAGATCGGAAGAGCGGTTCAGCAGGAATGCCGAGACCGATCT	TGCAGGAAGAGCRGATCCRGARTGCATGAGATCGGAAGAGCGGTTCAGCAGGAATGCCGAGACCGATCT	2	3		12	0.500000	0.250000	0.750000	0.250000	0.750000	0.000000	0.375000	0.375000	0.375000	10.925.000	8.508.333	128.404	-0.250000	-0.26192	2	0.00000	1.000.000	1.000.000	1.000.000	1.000.000	1.000.000	2.000.000	2.000.000	-	0	-	0	-	0	-	0	0	-	0	-	-
100194976|F|0-12:G>A-12:G>A	100194976	28176	TGCAGGAAGAGCAGATCCGGAGTGCATGAGATCGGAAGAGCGGTTCAGCAGGAATGCCGAGACCGATCT	TGCAGGAAGAGCRGATCCRGARTGCATGAGATCGGAAGAGCGGTTCAGCAGGAATGCCGAGACCGATCT	2	3	12:G>A	12	0.500000	0.250000	0.750000	0.250000	0.750000	0.000000	0.375000	0.375000	0.375000	10.925.000	8.508.333	128.404	-0.250000	-0.26192	2	0.00000	1.000.000	1.000.000	1.000.000	1.000.000	1.000.000	2.000.000	2.000.000	-	1	-	1	-	1	-	1	1	-	1	-	-
100195223|F|0--9:C>T	100195223	28395	TGCAGGCAACCATCTATGCATGAGATCGGAAGAGCGGTTCAGCAGGAATGCCGAGACCGATCTCGTATG	TGCAGGCAAYCATCTRKGCATGAGATCGGAAGAGCGGTTCAGCAGGAATGCCGAGACCGATCTCGTATG	2	3		9	0.500000	0.250000	0.750000	0.250000	0.750000	0.000000	0.375000	0.375000	0.375000	8.450.000	3.500.000	241.429	-0.250000	-0.22590	2	0.00000	1.000.000	1.000.000	1.000.000	1.000.000	1.000.000	2.000.000	2.000.000	1	0	1	0	-	0	-	0	0	-	0	-	-
100195223|F|0-9:C>T-9:C>T	100195223	28395	TGCAGGCAATCATCTGGGCATGAGATCGGAAGAGCGGTTCAGCAGGAATGCCGAGACCGATCTCGTATG	TGCAGGCAAYCATCTRKGCATGAGATCGGAAGAGCGGTTCAGCAGGAATGCCGAGACCGATCTCGTATG	2	3	9:C>T	9	0.500000	0.250000	0.750000	0.250000	0.750000	0.000000	0.375000	0.375000	0.375000	8.450.000	3.500.000	241.429	-0.250000	-0.22590	2	0.00000	1.000.000	1.000.000	1.000.000	1.000.000	1.000.000	2.000.000	2.000.000	0	1	0	1	-	1	-	1	1	-	1	-	-
100195304|F|0--35:T>C	100195304	28459	TGCAGGCCAGTGCGGCACAGTGCAGCAGGCAGGAGTGCGGCATGAGATCGGAAGAGCGGTTCAGCAGGA	TGCAGGCCAGTGCGGCACAGTGCAGCAGGCAGGAGYGCRGCATGAGATCGGAAGAGCGGTTCAGCAGGA	2	2		35	0.437500	0.857143	0.142857	0.857143	0.142857	0.000000	0.244898	0.244898	0.244898	7.100.000	4.300.000	165.116	-0.142857	-0.14462	2	0.00000	1.000.000	1.000.000	1.000.000	1.000.000	1.000.000	1.000.000	1.000.000	-	1	-	1	-	1	-	1	1	0	1	-	-
100195304|F|0-35:T>C-35:T>C	100195304	28459	TGCAGGCCAGTGCGGCACAGTGCAGCAGGCAGGAGCGCAGCATGAGATCGGAAGAGCGGTTCAGCAGGA	TGCAGGCCAGTGCGGCACAGTGCAGCAGGCAGGAGYGCRGCATGAGATCGGAAGAGCGGTTCAGCAGGA	2	2	35:T>C	35	0.437500	0.857143	0.142857	0.857143	0.142857	0.000000	0.244898	0.244898	0.244898	7.100.000	4.300.000	165.116	-0.142857	-0.14462	2	0.00000	1.000.000	1.000.000	1.000.000	1.000.000	1.000.000	1.000.000	1.000.000	-	0	-	0	-	0	-	0	0	1	0	-	-
100195357|F|0--17:C>T	100195357	28498	TGCAGGCGATTCCATGACATTCCACTGTTTAATATTGCATGAGATCGGAAGAGCGGTTCAGCAGGAATG	TGCAGGCGATTCCATGAYRKTCCACTGTTTAATATTGCATGAGATCGGAAGAGCGGTTCAGCAGGAATG	2	3		17	0.437500	0.857143	0.142857	0.857143	0.142857	0.000000	0.244898	0.244898	0.244898	6.175.000	3.500.000	176.429	-0.142857	-0.13148	2	0.00000	1.000.000	1.000.000	1.000.000	1.000.000	1.000.000	1.000.000	1.000.000	-	1	-	1	-	1	-	1	1	0	1	-	-
100195357|F|0-17:C>T-17:C>T	100195357	28498	TGCAGGCGATTCCATGATGGTCCACTGTTTAATATTGCATGAGATCGGAAGAGCGGTTCAGCAGGAATG	TGCAGGCGATTCCATGAYRKTCCACTGTTTAATATTGCATGAGATCGGAAGAGCGGTTCAGCAGGAATG	2	3	17:C>T	17	0.437500	0.857143	0.142857	0.857143	0.142857	0.000000	0.244898	0.244898	0.244898	6.175.000	3.500.000	176.429	-0.142857	-0.13148	2	0.00000	1.000.000	1.000.000	1.000.000	1.000.000	1.000.000	1.000.000	1.000.000	-	0	-	0	-	0	-	0	0	1	0	-	-
100195359|F|0--6:C>T	100195359	28499	TGCAGGCGATTCGGACATCATCAGGAGCATGAGATCGGAAGAGCGGTTCAGCAGGAATGCCGAGACCGA	TGCAGGYGAYTCKGACATCATCAGGAGCATGAGATCGGAAGAGCGGTTCAGCAGGAATGCCGAGACCGA	2	3		6	0.437500	0.857143	0.142857	0.857143	0.142857	0.000000	0.244898	0.244898	0.244898	7.708.333	4.450.000	173.221	-0.142857	-0.14035	2	0.00000	1.000.000	1.000.000	1.000.000	1.000.000	1.000.000	1.000.000	1.000.000	-	1	-	1	-	1	-	1	1	0	1	-	-
100195359|F|0-6:C>T-6:C>T	100195359	28499	TGCAGGTGACTCTGACATCATCAGGAGCATGAGATCGGAAGAGCGGTTCAGCAGGAATGCCGAGACCGA	TGCAGGYGAYTCKGACATCATCAGGAGCATGAGATCGGAAGAGCGGTTCAGCAGGAATGCCGAGACCGA	2	3	6:C>T	6	0.437500	0.857143	0.142857	0.857143	0.142857	0.000000	0.244898	0.244898	0.244898	7.708.333	4.450.000	173.221	-0.142857	-0.14035	2	0.00000	1.000.000	1.000.000	1.000.000	1.000.000	1.000.000	1.000.000	1.000.000	-	0	-	0	-	0	-	0	0	1	0	-	-
100195422|F|0--5:G>A	100195422	28548	TGCAGGCTCTTGGGGTCCTGGGCCAGGCCGGAGGCGAAGGCGGCCAGGGCGTCGGCATGAGATCGGAAG	TGCAGRCTCTTGGGGTCCTGGGCCAGGCCGGAGGCGAAGGCGGCCAGGGCGTCKGCATGAGATCGGAAG	2	2		5	0.437500	0.714286	0.285714	0.714286	0.285714	0.000000	0.408163	0.408163	0.408163	3.822.222	1.100.000	347.475	-0.285714	-0.17851	2	0.00000	1.000.000	1.000.000	1.000.000	1.000.000	1.000.000	2.000.000	2.000.000	-	1	-	1	-	0	-	0	1	1	1	-	-
100195422|F|0-5:G>A-5:G>A	100195422	28548	TGCAGACTCTTGGGGTCCTGGGCCAGGCCGGAGGCGAAGGCGGCCAGGGCGTCTGCATGAGATCGGAAG	TGCAGRCTCTTGGGGTCCTGGGCCAGGCCGGAGGCGAAGGCGGCCAGGGCGTCKGCATGAGATCGGAAG	2	2	5:G>A	5	0.437500	0.714286	0.285714	0.714286	0.285714	0.000000	0.408163	0.408163	0.408163	3.822.222	1.100.000	347.475	-0.285714	-0.17851	2	0.00000	1.000.000	1.000.000	1.000.000	1.000.000	1.000.000	2.000.000	2.000.000	-	0	-	0	-	1	-	1	0	0	0	-	-
100195450|F|0--14:C>G	100195450	28569	TGCAGGCTGTGGGGCCGGTACAGCATGAGATCGGAAGAGCGGTTCAGCAGGAATGCCGAGACCGATCTC	TGCAGGCTGTGGGGSCGGWACAGCATGAGATCGGAAGAGCGGTTCAGCAGGAATGCCGAGACCGATCTC	2	2		14	0.500000	0.250000	0.750000	0.250000	0.750000	0.000000	0.375000	0.375000	0.375000	8.575.000	6.975.000	122.939	-0.250000	-0.26079	2	0.00000	1.000.000	1.000.000	1.000.000	1.000.000	1.000.000	2.000.000	2.000.000	-	0	-	0	-	0	-	0	0	-	0	-	-
100195450|F|0-14:C>G-14:C>G	100195450	28569	TGCAGGCTGTGGGGGCGGAACAGCATGAGATCGGAAGAGCGGTTCAGCAGGAATGCCGAGACCGATCTC	TGCAGGCTGTGGGGSCGGWACAGCATGAGATCGGAAGAGCGGTTCAGCAGGAATGCCGAGACCGATCTC	2	2	14:C>G	14	0.500000	0.250000	0.750000	0.250000	0.750000	0.000000	0.375000	0.375000	0.375000	8.575.000	6.975.000	122.939	-0.250000	-0.26079	2	0.00000	1.000.000	1.000.000	1.000.000	1.000.000	1.000.000	2.000.000	2.000.000	-	1	-	1	-	1	-	1	1	-	1	-	-
100195759|F|0--27:G>A	100195759	28819	TGCAGGTAGGGGGCGCCATGCCACATGGAGCATGAGATCGGAAGAGCGGTTCAGCAGGAATGCCGAGAC	TGCAGGTAGGGGGCGCCATGCCACATGRAGCATGAGATCGGAAGAGCGGTTCAGCAGGAATGCCGAGAC	2	1		27	0.437500	0.857143	0.142857	0.857143	0.142857	0.000000	0.244898	0.244898	0.244898	6.058.333	5.200.000	116.506	-0.142857	-0.14033	2	0.00000	1.000.000	1.000.000	1.000.000	1.000.000	1.000.000	1.000.000	1.000.000	-	1	-	1	-	1	-	1	1	0	1	-	-
100195759|F|0-27:G>A-27:G>A	100195759	28819	TGCAGGTAGGGGGCGCCATGCCACATGAAGCATGAGATCGGAAGAGCGGTTCAGCAGGAATGCCGAGAC	TGCAGGTAGGGGGCGCCATGCCACATGRAGCATGAGATCGGAAGAGCGGTTCAGCAGGAATGCCGAGAC	2	1	27:G>A	27	0.437500	0.857143	0.142857	0.857143	0.142857	0.000000	0.244898	0.244898	0.244898	6.058.333	5.200.000	116.506	-0.142857	-0.14033	2	0.00000	1.000.000	1.000.000	1.000.000	1.000.000	1.000.000	1.000.000	1.000.000	-	0	-	0	-	0	-	0	0	1	0	-	-
100195809|F|0--23:T>C	100195809	28859	TGCAGGTCCCGTGTGAGCTTCCCTTTGTCTCTGAAACAGCCCAGAGAGTGCATGAGATCGGAAGAGCGG	TGCAGGTCCCGTGTGAGCTTCCCYTTGTCTCTGAAACAGCCCAGAGAGTGCATGAGATCGGAAGAGCGG	2	1		23	0.437500	0.857143	0.142857	0.857143	0.142857	0.000000	0.244898	0.244898	0.244898	5.908.333	3.000.000	196.944	-0.142857	-0.15188	2	0.00000	1.000.000	1.000.000	1.000.000	1.000.000	1.000.000	1.000.000	1.000.000	-	1	-	1	-	1	-	1	1	0	1	-	-
100195809|F|0-23:T>C-23:T>C	100195809	28859	TGCAGGTCCCGTGTGAGCTTCCCCTTGTCTCTGAAACAGCCCAGAGAGTGCATGAGATCGGAAGAGCGG	TGCAGGTCCCGTGTGAGCTTCCCYTTGTCTCTGAAACAGCCCAGAGAGTGCATGAGATCGGAAGAGCGG	2	1	23:T>C	23	0.437500	0.857143	0.142857	0.857143	0.142857	0.000000	0.244898	0.244898	0.244898	5.908.333	3.000.000	196.944	-0.142857	-0.15188	2	0.00000	1.000.000	1.000.000	1.000.000	1.000.000	1.000.000	1.000.000	1.000.000	-	0	-	0	-	0	-	0	0	1	0	-	-
100196027|F|0--5:G>C	100196027	29029	TGCAGGTTTTAAACTTTGGCATGAGATCGGAAGAGCGGTTCAGCAGGAATGCCGAGACCGATCTCGTAT	TGCAGSTTTTAWAMTTTGGCATGAGATCGGAAGAGCGGTTCAGCAGGAATGCCGAGACCGATCTCGTAT	2	3		5	0.437500	0.857143	0.142857	0.857143	0.142857	0.000000	0.244898	0.244898	0.244898	6.441.667	1.450.000	444.253	-0.142857	-0.14782	2	0.00000	1.000.000	1.000.000	1.000.000	1.000.000	1.000.000	1.000.000	1.000.000	-	1	-	1	-	1	-	1	1	0	1	-	-
100196027|F|0-5:G>C-5:G>C	100196027	29029	TGCAGCTTTTATAATTTGGCATGAGATCGGAAGAGCGGTTCAGCAGGAATGCCGAGACCGATCTCGTAT	TGCAGSTTTTAWAMTTTGGCATGAGATCGGAAGAGCGGTTCAGCAGGAATGCCGAGACCGATCTCGTAT	2	3	5:G>C	5	0.437500	0.857143	0.142857	0.857143	0.142857	0.000000	0.244898	0.244898	0.244898	6.441.667	1.450.000	444.253	-0.142857	-0.14782	2	0.00000	1.000.000	1.000.000	1.000.000	1.000.000	1.000.000	1.000.000	1.000.000	-	0	-	0	-	0	-	0	0	1	0	-	-
100196415|F|0--17:G>A	100196415	29341	TGCAGTCGGCGTATCTCGGCATGAGATCGGAAGAGCGGTTCAGCAGGAATGCCGAGACCGATCTCGTAT	TGCAGTCGGCGTATCTCRGCATGAGATCGGAAGAGCGGTTCAGCAGGAATGCCGAGACCGATCTCGTAT	2	1		17	0.437500	0.571429	0.428571	0.571429	0.428571	0.000000	0.489796	0.489796	0.489796	8.800.000	5.716.667	153.936	-0.428571	-0.20583	2	0.00000	1.000.000	1.000.000	1.000.000	1.000.000	1.000.000	3.000.000	3.000.000	-	1	-	1	-	0	-	0	1	0	1	-	-
100196415|F|0-17:G>A-17:G>A	100196415	29341	TGCAGTCGGCGTATCTCAGCATGAGATCGGAAGAGCGGTTCAGCAGGAATGCCGAGACCGATCTCGTAT	TGCAGTCGGCGTATCTCRGCATGAGATCGGAAGAGCGGTTCAGCAGGAATGCCGAGACCGATCTCGTAT	2	1	17:G>A	17	0.437500	0.571429	0.428571	0.571429	0.428571	0.000000	0.489796	0.489796	0.489796	8.800.000	5.716.667	153.936	-0.428571	-0.20583	2	0.00000	1.000.000	1.000.000	1.000.000	1.000.000	1.000.000	3.000.000	3.000.000	-	0	-	0	-	1	-	1	0	1	0	-	-
100196729|F|0--5:T>G	100196729	29582	TGCAGTGGCAGTCGGGCTGCATGAGATCGGAAGAGCGGTTCAGCAGGAATGCCGAGACCGATCTCGTAT	TGCAGKGGCAGTSRGGCTGCATGAGATCGGAAGAGCGGTTCAGCAGGAATGCCGAGACCGATCTCGTAT	2	3		5	0.437500	0.857143	0.142857	0.857143	0.142857	0.000000	0.244898	0.244898	0.244898	7.683.333	4.150.000	185.141	-0.142857	-0.13913	2	0.00000	1.000.000	1.000.000	1.000.000	1.000.000	1.000.000	1.000.000	1.000.000	-	1	-	1	-	1	-	1	1	0	1	-	-
100196729|F|0-5:T>G-5:T>G	100196729	29582	TGCAGGGGCAGTGAGGCTGCATGAGATCGGAAGAGCGGTTCAGCAGGAATGCCGAGACCGATCTCGTAT	TGCAGKGGCAGTSRGGCTGCATGAGATCGGAAGAGCGGTTCAGCAGGAATGCCGAGACCGATCTCGTAT	2	3	5:T>G	5	0.437500	0.857143	0.142857	0.857143	0.142857	0.000000	0.244898	0.244898	0.244898	7.683.333	4.150.000	185.141	-0.142857	-0.13913	2	0.00000	1.000.000	1.000.000	1.000.000	1.000.000	1.000.000	1.000.000	1.000.000	-	0	-	0	-	0	-	0	0	1	0	-	-
100196754|F|0--7:A>G	100196754	29602	TGCAGTGAGCAGGAAGAAGAAACAGCATGAGATCGGAAGAGCGGTTCAGCAGGAATGCCGAGACCGATC	TGCAGTGRGCAGGAAGAAGAAACAGCATGAGATCGGAAGAGCGGTTCAGCAGGAATGCCGAGACCGATC	2	1		7	0.437500	0.285714	0.714286	0.285714	0.714286	0.000000	0.408163	0.408163	0.408163	8.475.000	6.511.111	130.162	-0.285714	-0.21673	2	0.00000	1.000.000	1.000.000	1.000.000	1.000.000	1.000.000	2.000.000	2.000.000	1	0	1	0	-	-	-	0	0	-	0	-	-
100196754|F|0-7:A>G-7:A>G	100196754	29602	TGCAGTGGGCAGGAAGAAGAAACAGCATGAGATCGGAAGAGCGGTTCAGCAGGAATGCCGAGACCGATC	TGCAGTGRGCAGGAAGAAGAAACAGCATGAGATCGGAAGAGCGGTTCAGCAGGAATGCCGAGACCGATC	2	1	7:A>G	7	0.437500	0.285714	0.714286	0.285714	0.714286	0.000000	0.408163	0.408163	0.408163	8.475.000	6.511.111	130.162	-0.285714	-0.21673	2	0.00000	1.000.000	1.000.000	1.000.000	1.000.000	1.000.000	2.000.000	2.000.000	0	1	0	1	-	-	-	1	1	-	1	-	-
100197002|F|0--5:T>C	100197002	29799	TGCAGTTCGGGTTTGGGCACACGCATGAGATCGGAAGAGCGGTTCAGCAGGAATGCCGAGACCGATCTC	TGCAGYTCRGGTTTSGGCACACGCATGAGATCGGAAGAGCGGTTCAGCAGGAATGCCGAGACCGATCTC	2	3		5	0.437500	0.857143	0.142857	0.857143	0.142857	0.000000	0.244898	0.244898	0.244898	6.000.000	3.150.000	190.476	-0.142857	-0.13643	2	0.00000	1.000.000	1.000.000	1.000.000	1.000.000	1.000.000	1.000.000	1.000.000	-	1	-	1	-	1	-	1	1	0	1	-	-
100197002|F|0-5:T>C-5:T>C	100197002	29799	TGCAGCTCAGGTTTCGGCACACGCATGAGATCGGAAGAGCGGTTCAGCAGGAATGCCGAGACCGATCTC	TGCAGYTCRGGTTTSGGCACACGCATGAGATCGGAAGAGCGGTTCAGCAGGAATGCCGAGACCGATCTC	2	3	5:T>C	5	0.437500	0.857143	0.142857	0.857143	0.142857	0.000000	0.244898	0.244898	0.244898	6.000.000	3.150.000	190.476	-0.142857	-0.13643	2	0.00000	1.000.000	1.000.000	1.000.000	1.000.000	1.000.000	1.000.000	1.000.000	-	0	-	0	-	0	-	0	0	1	0	-	-
100202515|F|0--11:T>A	100202515	34767	TGCAGAGCATTTGGAGGCATGAGATCGGAAGAGCGGTTCAGCAGGAATGCCGAGACCGATCTCGTATGC	TGCAGAGCATTWGRAGGCATGAGATCGGAAGAGCGGTTCAGCAGGAATGCCGAGACCGATCTCGTATGC	2	2		11	0.500000	0.250000	0.750000	0.250000	0.750000	0.000000	0.375000	0.375000	0.375000	1.500.000	1.300.000	115.385	-0.250000	-0.18453	2	0.00000	1.000.000	1.000.000	1.000.000	1.000.000	1.000.000	1.000.000	1.000.000	-	0	-	0	-	0	-	0	0	-	0	1	1
100202515|F|0-11:T>A-11:T>A	100202515	34767	TGCAGAGCATTAGAAGGCATGAGATCGGAAGAGCGGTTCAGCAGGAATGCCGAGACCGATCTCGTATGC	TGCAGAGCATTWGRAGGCATGAGATCGGAAGAGCGGTTCAGCAGGAATGCCGAGACCGATCTCGTATGC	2	2	11:T>A	11	0.500000	0.250000	0.750000	0.250000	0.750000	0.000000	0.375000	0.375000	0.375000	1.500.000	1.300.000	115.385	-0.250000	-0.18453	2	0.00000	1.000.000	1.000.000	1.000.000	1.000.000	1.000.000	1.000.000	1.000.000	-	1	-	1	-	1	-	1	1	-	1	0	0
100202526|F|0--6:T>G	100202526	34773	TGCAGATCGAGTGCATGCATGAGATCGGAAGAGCGGTTCAGCAGGAATGCCGAGACCGATCTCGTATGC	TGCAGAKCGAGWGCATGCATGAGATCGGAAGAGCGGTTCAGCAGGAATGCCGAGACCGATCTCGTATGC	2	2		6	0.500000	0.250000	0.750000	0.250000	0.750000	0.000000	0.375000	0.375000	0.375000	2.800.000	1.663.636	168.306	-0.250000	-0.14773	2	0.00000	1.000.000	1.000.000	1.000.000	1.000.000	1.000.000	0.000000	0.000000	-	0	-	0	-	0	-	0	0	-	0	1	1
100202526|F|0-6:T>G-6:T>G	100202526	34773	TGCAGAGCGAGAGCATGCATGAGATCGGAAGAGCGGTTCAGCAGGAATGCCGAGACCGATCTCGTATGC	TGCAGAKCGAGWGCATGCATGAGATCGGAAGAGCGGTTCAGCAGGAATGCCGAGACCGATCTCGTATGC	2	2	6:T>G	6	0.500000	0.250000	0.750000	0.250000	0.750000	0.000000	0.375000	0.375000	0.375000	2.800.000	1.663.636	168.306	-0.250000	-0.14773	2	0.00000	1.000.000	1.000.000	1.000.000	1.000.000	1.000.000	0.000000	0.000000	-	1	-	1	-	1	-	1	1	-	1	0	0
100202528|F|0--9:T>A	100202528	34774	TGCAGATGCTAAGTTAGGCATGAGATCGGAAGAGCGGTTCAGCAGGAATGCCGAGACCGATCTCGTATG	TGCAGATGCWAAGTTAGGCATGAGATCGGAAGAGCGGTTCAGCAGGAATGCCGAGACCGATCTCGTATG	2	1		9	0.562500	0.666667	0.333333	0.666667	0.333333	0.000000	0.444444	0.444444	0.444444	6.091.667	3.900.000	156.197	-0.333333	-0.22778	2	0.00000	1.000.000	1.000.000	1.000.000	1.000.000	1.000.000	2.000.000	2.000.000	-	1	-	1	-	1	-	1	1	0	1	0	0
100202528|F|0-9:T>A-9:T>A	100202528	34774	TGCAGATGCAAAGTTAGGCATGAGATCGGAAGAGCGGTTCAGCAGGAATGCCGAGACCGATCTCGTATG	TGCAGATGCWAAGTTAGGCATGAGATCGGAAGAGCGGTTCAGCAGGAATGCCGAGACCGATCTCGTATG	2	1	9:T>A	9	0.562500	0.666667	0.333333	0.666667	0.333333	0.000000	0.444444	0.444444	0.444444	6.091.667	3.900.000	156.197	-0.333333	-0.22778	2	0.00000	1.000.000	1.000.000	1.000.000	1.000.000	1.000.000	2.000.000	2.000.000	-	0	-	0	-	0	-	0	0	1	0	1	1
100202550|F|0--8:G>A	100202550	34790	TGCAGCCTGATTTGGAGCATGAGATCGGAAGAGCGGTTCAGCAGGAATGCCGAGACCGATCTCGTATGC	TGCAGCCTRATTTGGAGCATGAGATCGGAAGAGCGGTTCAGCAGGAATGCCGAGACCGATCTCGTATGC	2	1		8	0.625000	0.200000	0.800000	0.200000	0.800000	0.000000	0.320000	0.320000	0.320000	8.575.000	5.220.000	164.272	-0.200000	-0.28390	2	0.00000	1.000.000	1.000.000	1.000.000	1.000.000	1.000.000	2.000.000	2.000.000	-	0	-	0	-	0	-	0	0	-	0	0	0
100202550|F|0-8:G>A-8:G>A	100202550	34790	TGCAGCCTAATTTGGAGCATGAGATCGGAAGAGCGGTTCAGCAGGAATGCCGAGACCGATCTCGTATGC	TGCAGCCTRATTTGGAGCATGAGATCGGAAGAGCGGTTCAGCAGGAATGCCGAGACCGATCTCGTATGC	2	1	8:G>A	8	0.625000	0.200000	0.800000	0.200000	0.800000	0.000000	0.320000	0.320000	0.320000	8.575.000	5.220.000	164.272	-0.200000	-0.28390	2	0.00000	1.000.000	1.000.000	1.000.000	1.000.000	1.000.000	2.000.000	2.000.000	-	1	-	1	-	1	-	1	1	-	1	1	1
100202564|F|0--11:A>G	100202564	34799	TGCAGCTGGGAACATGGCATGAGATCGGAAGAGCGGTTCAGCAGGAATGCCGAGACCGATCTCGTATGC	TGCAGCTGGGARCATGGCATGAGATCGGAAGAGCGGTTCAGCAGGAATGCCGAGACCGATCTCGTATGC	2	1		11	0.500000	0.750000	0.250000	0.750000	0.250000	0.000000	0.375000	0.375000	0.375000	4.816.667	1.400.000	344.048	-0.250000	-0.17087	2	0.00000	1.000.000	1.000.000	1.000.000	1.000.000	1.000.000	1.000.000	1.000.000	-	1	-	1	-	1	-	1	1	-	1	0	0
100202564|F|0-11:A>G-11:A>G	100202564	34799	TGCAGCTGGGAGCATGGCATGAGATCGGAAGAGCGGTTCAGCAGGAATGCCGAGACCGATCTCGTATGC	TGCAGCTGGGARCATGGCATGAGATCGGAAGAGCGGTTCAGCAGGAATGCCGAGACCGATCTCGTATGC	2	1	11:A>G	11	0.500000	0.750000	0.250000	0.750000	0.250000	0.000000	0.375000	0.375000	0.375000	4.816.667	1.400.000	344.048	-0.250000	-0.17087	2	0.00000	1.000.000	1.000.000	1.000.000	1.000.000	1.000.000	1.000.000	1.000.000	-	0	-	0	-	0	-	0	0	-	0	1	1
100202579|F|0--16:A>T	100202579	34810	TGCAGGCTCACCTGTCACGCATGAGATCGGAAGAGCGGTTCAGCAGGAATGCCGAGACCGATCTCGTAT	TGCAGGCTCACCTGTCWCGCATGAGATCGGAAGAGCGGTTCAGCAGGAATGCCGAGACCGATCTCGTAT	2	1		16	0.437500	0.714286	0.285714	0.714286	0.285714	0.000000	0.408163	0.408163	0.408163	4.390.000	1.666.667	263.400	-0.285714	-0.16396	2	0.00000	1.000.000	1.000.000	1.000.000	1.000.000	1.000.000	0.000000	0.000000	-	1	-	1	-	-	-	-	1	1	1	0	0
100202579|F|0-16:A>T-16:A>T	100202579	34810	TGCAGGCTCACCTGTCTCGCATGAGATCGGAAGAGCGGTTCAGCAGGAATGCCGAGACCGATCTCGTAT	TGCAGGCTCACCTGTCWCGCATGAGATCGGAAGAGCGGTTCAGCAGGAATGCCGAGACCGATCTCGTAT	2	1	16:A>T	16	0.437500	0.714286	0.285714	0.714286	0.285714	0.000000	0.408163	0.408163	0.408163	4.390.000	1.666.667	263.400	-0.285714	-0.16396	2	0.00000	1.000.000	1.000.000	1.000.000	1.000.000	1.000.000	0.000000	0.000000	-	0	-	0	-	-	-	-	0	0	0	1	1
100202580|F|0--8:G>C	100202580	34811	TGCAGGCTGTAATTAAGCATGAGATCGGAAGAGCGGTTCAGCAGGAATGCCGAGACCGATCTCGTATGC	TGCAGGCTSTAATTAAGCATGAGATCGGAAGAGCGGTTCAGCAGGAATGCCGAGACCGATCTCGTATGC	2	1		8	0.500000	0.750000	0.250000	0.750000	0.250000	0.000000	0.375000	0.375000	0.375000	1.183.333	500.000	236.667	-0.250000	-0.15066	2	0.00000	1.000.000	1.000.000	1.000.000	1.000.000	1.000.000	0.000000	0.000000	-	1	-	1	-	1	-	1	1	-	1	0	0
100202580|F|0-8:G>C-8:G>C	100202580	34811	TGCAGGCTCTAATTAAGCATGAGATCGGAAGAGCGGTTCAGCAGGAATGCCGAGACCGATCTCGTATGC	TGCAGGCTSTAATTAAGCATGAGATCGGAAGAGCGGTTCAGCAGGAATGCCGAGACCGATCTCGTATGC	2	1	8:G>C	8	0.500000	0.750000	0.250000	0.750000	0.250000	0.000000	0.375000	0.375000	0.375000	1.183.333	500.000	236.667	-0.250000	-0.15066	2	0.00000	1.000.000	1.000.000	1.000.000	1.000.000	1.000.000	0.000000	0.000000	-	0	-	0	-	0	-	0	0	-	0	1	1
100202603|F|0--11:G>A	100202603	34826	TGCAGGTTTAGGTAACGCATGAGATCGGAAGAGCGGTTCAGCAGGAATGCCGAGACCGATCTCGTATGC	TGCAGGTTTAGRWAACGCATGAGATCGGAAGAGCGGTTCAGCAGGAATGCCGAGACCGATCTCGTATGC	2	2		11	0.500000	0.750000	0.250000	0.750000	0.250000	0.000000	0.375000	0.375000	0.375000	3.858.333	1.933.333	199.569	-0.250000	-0.15991	2	0.00000	1.000.000	1.000.000	1.000.000	1.000.000	1.000.000	1.000.000	1.000.000	-	1	-	1	-	1	-	1	1	-	1	0	0
100202603|F|0-11:G>A-11:G>A	100202603	34826	TGCAGGTTTAGAAAACGCATGAGATCGGAAGAGCGGTTCAGCAGGAATGCCGAGACCGATCTCGTATGC	TGCAGGTTTAGRWAACGCATGAGATCGGAAGAGCGGTTCAGCAGGAATGCCGAGACCGATCTCGTATGC	2	2	11:G>A	11	0.500000	0.750000	0.250000	0.750000	0.250000	0.000000	0.375000	0.375000	0.375000	3.858.333	1.933.333	199.569	-0.250000	-0.15991	2	0.00000	1.000.000	1.000.000	1.000.000	1.000.000	1.000.000	1.000.000	1.000.000	-	0	-	0	-	0	-	0	0	-	0	1	1
100202630|F|0--8:A>G	100202630	34842	TGCAGTTTACTGACATCAGCATGAGATCGGAAGAGCGGTTCAGCAGGAATGCCGAGACCGATCTCGTAT	TGCAGTTTRCTGACATYAGCATGAGATCGGAAGAGCGGTTCAGCAGGAATGCCGAGACCGATCTCGTAT	2	2		8	0.500000	0.750000	0.250000	0.750000	0.250000	0.000000	0.375000	0.375000	0.375000	6.108.333	4.550.000	134.249	-0.250000	-0.18824	2	0.00000	1.000.000	1.000.000	1.000.000	1.000.000	1.000.000	1.000.000	1.000.000	-	1	-	1	-	1	-	1	1	-	1	0	0
100202630|F|0-8:A>G-8:A>G	100202630	34842	TGCAGTTTGCTGACATTAGCATGAGATCGGAAGAGCGGTTCAGCAGGAATGCCGAGACCGATCTCGTAT	TGCAGTTTRCTGACATYAGCATGAGATCGGAAGAGCGGTTCAGCAGGAATGCCGAGACCGATCTCGTAT	2	2	8:A>G	8	0.500000	0.750000	0.250000	0.750000	0.250000	0.000000	0.375000	0.375000	0.375000	6.108.333	4.550.000	134.249	-0.250000	-0.18824	2	0.00000	1.000.000	1.000.000	1.000.000	1.000.000	1.000.000	1.000.000	1.000.000	-	0	-	0	-	0	-	0	0	-	0	1	1
100202635|F|0--6:C>A	100202635	34846	TGCAGACACCAAAAAAGCATGAGATCGGAAGAGCGGTTCAGCAGGAATGCCGAGACCGATCTCGTATGC	TGCAGAMACCAAAAAWGCATGAGATCGGAAGAGCGGTTCAGCAGGAATGCCGAGACCGATCTCGTATGC	2	2		6	0.500000	0.250000	0.750000	0.250000	0.750000	0.000000	0.375000	0.375000	0.375000	5.025.000	1.458.333	344.571	-0.250000	-0.22821	2	0.00000	1.000.000	1.000.000	1.000.000	1.000.000	1.000.000	2.000.000	2.000.000	-	0	-	0	1	0	1	0	0	-	0	-	-
100202635|F|0-6:C>A-6:C>A	100202635	34846	TGCAGAAACCAAAAATGCATGAGATCGGAAGAGCGGTTCAGCAGGAATGCCGAGACCGATCTCGTATGC	TGCAGAMACCAAAAAWGCATGAGATCGGAAGAGCGGTTCAGCAGGAATGCCGAGACCGATCTCGTATGC	2	2	6:C>A	6	0.500000	0.250000	0.750000	0.250000	0.750000	0.000000	0.375000	0.375000	0.375000	5.025.000	1.458.333	344.571	-0.250000	-0.22821	2	0.00000	1.000.000	1.000.000	1.000.000	1.000.000	1.000.000	2.000.000	2.000.000	-	1	-	1	0	1	0	1	1	-	1	-	-
100202735|F|0--7:A>C	100202735	34919	TGCAGTCATACATGTGCATGAGATCGGAAGAGCGGTTCAGCAGGAATGCCGAGACCGATCTCGTATGCC	TGCAGTCMTAMATGTGCATGAGATCGGAAGAGCGGTTCAGCAGGAATGCCGAGACCGATCTCGTATGCC	2	2		7	0.437500	0.428571	0.571429	0.428571	0.571429	0.000000	0.489796	0.489796	0.489796	1.020.000	812.500	125.538	-0.428571	-0.17990	2	0.00000	1.000.000	1.000.000	1.000.000	1.000.000	1.000.000	2.000.000	2.000.000	-	0	-	0	1	-	1	-	0	-	0	1	-
100202735|F|0-7:A>C-7:A>C	100202735	34919	TGCAGTCCTAAATGTGCATGAGATCGGAAGAGCGGTTCAGCAGGAATGCCGAGACCGATCTCGTATGCC	TGCAGTCMTAMATGTGCATGAGATCGGAAGAGCGGTTCAGCAGGAATGCCGAGACCGATCTCGTATGCC	2	2	7:A>C	7	0.437500	0.428571	0.571429	0.428571	0.571429	0.000000	0.489796	0.489796	0.489796	1.020.000	812.500	125.538	-0.428571	-0.17990	2	0.00000	1.000.000	1.000.000	1.000.000	1.000.000	1.000.000	2.000.000	2.000.000	-	1	-	1	0	-	0	-	1	-	1	0	-
100202771|F|0--14:T>C	100202771	34946	TGCAGACCTAATCCTGCATGAGATCGGAAGAGCGGTTCAGCAGGAATGCCGAGACCGATCTCGTATGCC	TGCAGACCTAATCCYGCATGAGATCGGAAGAGCGGTTCAGCAGGAATGCCGAGACCGATCTCGTATGCC	2	1		14	0.437500	0.857143	0.142857	0.857143	0.142857	0.000000	0.244898	0.244898	0.244898	1.741.667	1.300.000	133.974	-0.142857	-0.12065	2	0.00000	1.000.000	1.000.000	1.000.000	1.000.000	1.000.000	1.000.000	1.000.000	-	1	-	1	-	1	-	1	1	0	1	-	-
100202771|F|0-14:T>C-14:T>C	100202771	34946	TGCAGACCTAATCCCGCATGAGATCGGAAGAGCGGTTCAGCAGGAATGCCGAGACCGATCTCGTATGCC	TGCAGACCTAATCCYGCATGAGATCGGAAGAGCGGTTCAGCAGGAATGCCGAGACCGATCTCGTATGCC	2	1	14:T>C	14	0.437500	0.857143	0.142857	0.857143	0.142857	0.000000	0.244898	0.244898	0.244898	1.741.667	1.300.000	133.974	-0.142857	-0.12065	2	0.00000	1.000.000	1.000.000	1.000.000	1.000.000	1.000.000	1.000.000	1.000.000	-	0	-	0	-	0	-	0	0	1	0	-	-
100202782|F|0--10:C>A	100202782	34954	TGCAGAGGGACCATCTTGCATGAGATCGGAAGAGCGGTTCAGCAGGAATGCCGAGACCGATCTCGTATG	TGCAGAGGGAMCATCKTGCATGAGATCGGAAGAGCGGTTCAGCAGGAATGCCGAGACCGATCTCGTATG	2	2		10	0.437500	0.857143	0.142857	0.857143	0.142857	0.000000	0.244898	0.244898	0.244898	5.300.000	4.200.000	126.190	-0.142857	-0.12967	2	0.00000	1.000.000	1.000.000	1.000.000	1.000.000	1.000.000	1.000.000	1.000.000	-	1	-	1	-	1	-	1	1	0	1	-	-
100202782|F|0-10:C>A-10:C>A	100202782	34954	TGCAGAGGGAACATCGTGCATGAGATCGGAAGAGCGGTTCAGCAGGAATGCCGAGACCGATCTCGTATG	TGCAGAGGGAMCATCKTGCATGAGATCGGAAGAGCGGTTCAGCAGGAATGCCGAGACCGATCTCGTATG	2	2	10:C>A	10	0.437500	0.857143	0.142857	0.857143	0.142857	0.000000	0.244898	0.244898	0.244898	5.300.000	4.200.000	126.190	-0.142857	-0.12967	2	0.00000	1.000.000	1.000.000	1.000.000	1.000.000	1.000.000	1.000.000	1.000.000	-	0	-	0	-	0	-	0	0	1	0	-	-
100202843|F|0--8:C>T	100202843	35002	TGCAGCTCCGCCCCCGATCGCATGAGATCGGAAGAGCGGTTCAGCAGGAATGCCGAGACCGATCTCGTA	TGCAGCTCYGCCCCYGATCGCATGAGATCGGAAGAGCGGTTCAGCAGGAATGCCGAGACCGATCTCGTA	2	2		8	0.437500	0.142857	0.857143	0.142857	0.857143	0.000000	0.244898	0.244898	0.244898	2.800.000	2.541.667	110.164	-0.142857	-0.13729	2	0.00000	1.000.000	1.000.000	1.000.000	1.000.000	1.000.000	1.000.000	1.000.000	-	0	-	0	-	0	-	0	0	1	0	-	-
100202843|F|0-8:C>T-8:C>T	100202843	35002	TGCAGCTCTGCCCCTGATCGCATGAGATCGGAAGAGCGGTTCAGCAGGAATGCCGAGACCGATCTCGTA	TGCAGCTCYGCCCCYGATCGCATGAGATCGGAAGAGCGGTTCAGCAGGAATGCCGAGACCGATCTCGTA	2	2	8:C>T	8	0.437500	0.142857	0.857143	0.142857	0.857143	0.000000	0.244898	0.244898	0.244898	2.800.000	2.541.667	110.164	-0.142857	-0.13729	2	0.00000	1.000.000	1.000.000	1.000.000	1.000.000	1.000.000	1.000.000	1.000.000	-	1	-	1	-	1	-	1	1	0	1	-	-
100202916|F|0--7:G>T	100202916	35057	TGCAGTGGGAGACCCAGCATGAGATCGGAAGAGCGGTTCAGCAGGAATGCCGAGACCGATCTCGTATGC	TGCAGTGKGAGACCCMGCATGAGATCGGAAGAGCGGTTCAGCAGGAATGCCGAGACCGATCTCGTATGC	2	2		7	0.500000	0.250000	0.750000	0.250000	0.750000	0.000000	0.375000	0.375000	0.375000	9.000.000	5.825.000	154.506	-0.250000	-0.25050	2	0.00000	1.000.000	1.000.000	1.000.000	1.000.000	1.000.000	2.000.000	2.000.000	-	0	-	0	-	0	-	0	0	-	0	-	-
100202916|F|0-7:G>T-7:G>T	100202916	35057	TGCAGTGTGAGACCCCGCATGAGATCGGAAGAGCGGTTCAGCAGGAATGCCGAGACCGATCTCGTATGC	TGCAGTGKGAGACCCMGCATGAGATCGGAAGAGCGGTTCAGCAGGAATGCCGAGACCGATCTCGTATGC	2	2	7:G>T	7	0.500000	0.250000	0.750000	0.250000	0.750000	0.000000	0.375000	0.375000	0.375000	9.000.000	5.825.000	154.506	-0.250000	-0.25050	2	0.00000	1.000.000	1.000.000	1.000.000	1.000.000	1.000.000	2.000.000	2.000.000	-	1	-	1	-	1	-	1	1	-	1	-	-
100202922|F|0--12:A>C	100202922	35061	TGCAGTTCTCAAAGCTGCATGAGATCGGAAGAGCGGTTCAGCAGGAATGCCGAGACCGATCTCGTATGC	TGCAGTTCTCAAMRCTGCATGAGATCGGAAGAGCGGTTCAGCAGGAATGCCGAGACCGATCTCGTATGC	2	2		12	0.437500	0.857143	0.142857	0.857143	0.142857	0.000000	0.244898	0.244898	0.244898	6.025.000	1.500.000	401.667	-0.142857	-0.15999	2	0.00000	1.000.000	1.000.000	1.000.000	1.000.000	1.000.000	1.000.000	1.000.000	-	1	-	1	-	1	-	1	1	0	1	-	-
100202922|F|0-12:A>C-12:A>C	100202922	35061	TGCAGTTCTCAACACTGCATGAGATCGGAAGAGCGGTTCAGCAGGAATGCCGAGACCGATCTCGTATGC	TGCAGTTCTCAAMRCTGCATGAGATCGGAAGAGCGGTTCAGCAGGAATGCCGAGACCGATCTCGTATGC	2	2	12:A>C	12	0.437500	0.857143	0.142857	0.857143	0.142857	0.000000	0.244898	0.244898	0.244898	6.025.000	1.500.000	401.667	-0.142857	-0.15999	2	0.00000	1.000.000	1.000.000	1.000.000	1.000.000	1.000.000	1.000.000	1.000.000	-	0	-	0	-	0	-	0	0	1	0	-	-
100203181|F|0--13:G>C	100203181	35264	TGCAGTGATCATTGTGCATGAGATCGGAAGAGCGGTTCAGCAGGAATGCCGAGACCGATCTCGTATGCC	TGCAGTGATCATTSTGCATGAGATCGGAAGAGCGGTTCAGCAGGAATGCCGAGACCGATCTCGTATGCC	2	1		13	0.437500	0.714286	0.285714	0.714286	0.285714	0.000000	0.408163	0.408163	0.408163	1.870.000	400.000	467.500	-0.285714	-0.15222	2	0.00000	1.000.000	1.000.000	1.000.000	1.000.000	1.000.000	1.000.000	1.000.000	-	1	-	1	-	-	-	1	1	-	1	0	0
100203181|F|0-13:G>C-13:G>C	100203181	35264	TGCAGTGATCATTCTGCATGAGATCGGAAGAGCGGTTCAGCAGGAATGCCGAGACCGATCTCGTATGCC	TGCAGTGATCATTSTGCATGAGATCGGAAGAGCGGTTCAGCAGGAATGCCGAGACCGATCTCGTATGCC	2	1	13:G>C	13	0.437500	0.714286	0.285714	0.714286	0.285714	0.000000	0.408163	0.408163	0.408163	1.870.000	400.000	467.500	-0.285714	-0.15222	2	0.00000	1.000.000	1.000.000	1.000.000	1.000.000	1.000.000	1.000.000	1.000.000	-	0	-	0	-	-	-	0	0	-	0	1	1
100203198|F|0--6:G>A	100203198	35281	TGCAGTGAAGTGAGAGCATGAGATCGGAAGAGCGGTTCAGCAGGAATGCCGAGACCGATCTCGTATGCC	TGCAGTRAAGTGAGAGCATGAGATCGGAAGAGCGGTTCAGCAGGAATGCCGAGACCGATCTCGTATGCC	2	1		6	0.625000	0.600000	0.400000	0.600000	0.400000	0.000000	0.480000	0.480000	0.480000	2.883.333	816.667	353.061	-0.400000	-0.26919	2	0.00000	1.000.000	1.000.000	1.000.000	1.000.000	1.000.000	2.000.000	2.000.000	0	1	0	1	0	1	0	1	1	-	1	-	-
100203198|F|0-6:G>A-6:G>A	100203198	35281	TGCAGTAAAGTGAGAGCATGAGATCGGAAGAGCGGTTCAGCAGGAATGCCGAGACCGATCTCGTATGCC	TGCAGTRAAGTGAGAGCATGAGATCGGAAGAGCGGTTCAGCAGGAATGCCGAGACCGATCTCGTATGCC	2	1	6:G>A	6	0.625000	0.600000	0.400000	0.600000	0.400000	0.000000	0.480000	0.480000	0.480000	2.883.333	816.667	353.061	-0.400000	-0.26919	2	0.00000	1.000.000	1.000.000	1.000.000	1.000.000	1.000.000	2.000.000	2.000.000	1	0	1	0	1	0	1	0	0	-	0	-	-
100203232|F|0--7:T>G	100203232	35315	TGCAGCGTGGCATCAGCATGAGATCGGAAGAGCGGTTCAGCAGGAATGCCGAGACCGATCTCGTATGCC	TGCAGCGKGGCATCAGCATGAGATCGGAAGAGCGGTTCAGCAGGAATGCCGAGACCGATCTCGTATGCC	2	1		7	0.437500	0.571429	0.571429	0.428571	0.428571	0.142857	0.489796	0.489796	0.489796	6.957.143	6.762.500	102.878	-0.285714	-0.24113	2	0.00000	0.857143	1.000.000	0.928571	0.750000	1.000.000	4.000.000	3.000.000	-	0	-	0	-	-	-	-	1	1	0	-	-
100203232|F|0-7:T>G-7:T>G	100203232	35315	TGCAGCGGGGCATCAGCATGAGATCGGAAGAGCGGTTCAGCAGGAATGCCGAGACCGATCTCGTATGCC	TGCAGCGKGGCATCAGCATGAGATCGGAAGAGCGGTTCAGCAGGAATGCCGAGACCGATCTCGTATGCC	2	1	7:T>G	7	0.437500	0.571429	0.571429	0.428571	0.428571	0.142857	0.489796	0.489796	0.489796	6.957.143	6.762.500	102.878	-0.285714	-0.24113	2	0.00000	0.857143	1.000.000	0.928571	0.750000	1.000.000	4.000.000	3.000.000	-	1	-	1	-	-	-	-	1	0	1	-	-
100203252|F|0--12:G>A	100203252	35335	TGCAGTTGCTGCGAGGCATGAGATCGGAAGAGCGGTTCAGCAGGAATGCCGAGACCGATCTCGTATGCC	TGCAGTTGCTGCRAGGCATGAGATCGGAAGAGCGGTTCAGCAGGAATGCCGAGACCGATCTCGTATGCC	2	1		12	0.437500	0.571429	0.428571	0.571429	0.428571	0.000000	0.489796	0.489796	0.489796	6.112.500	2.316.667	263.849	-0.428571	-0.20963	2	0.00000	1.000.000	1.000.000	1.000.000	1.000.000	1.000.000	3.000.000	3.000.000	-	1	-	1	-	0	-	0	1	0	1	-	-
100203252|F|0-12:G>A-12:G>A	100203252	35335	TGCAGTTGCTGCAAGGCATGAGATCGGAAGAGCGGTTCAGCAGGAATGCCGAGACCGATCTCGTATGCC	TGCAGTTGCTGCRAGGCATGAGATCGGAAGAGCGGTTCAGCAGGAATGCCGAGACCGATCTCGTATGCC	2	1	12:G>A	12	0.437500	0.571429	0.428571	0.571429	0.428571	0.000000	0.489796	0.489796	0.489796	6.112.500	2.316.667	263.849	-0.428571	-0.20963	2	0.00000	1.000.000	1.000.000	1.000.000	1.000.000	1.000.000	3.000.000	3.000.000	-	0	-	0	-	1	-	1	0	1	0	-	-
100203253|F|0--14:A>G	100203253	35336	TGCAGTTTGTGGAAACGCATGAGATCGGAAGAGCGGTTCAGCAGGAATGCCGAGACCGATCTCGTATGC	TGCAGTTTGTGGAARCGCATGAGATCGGAAGAGCGGTTCAGCAGGAATGCCGAGACCGATCTCGTATGC	2	1		14	0.625000	0.800000	0.300000	0.700000	0.200000	0.100000	0.320000	0.420000	0.370000	5.362.500	4.560.000	117.599	-0.100000	-0.30627	2	0.00000	1.000.000	0.900000	0.950000	1.000.000	0.666667	2.000.000	3.000.000	0	1	0	1	-	1	-	1	1	-	1	-	-
100203253|F|0-14:A>G-14:A>G	100203253	35336	TGCAGTTTGTGGAAGCGCATGAGATCGGAAGAGCGGTTCAGCAGGAATGCCGAGACCGATCTCGTATGC	TGCAGTTTGTGGAARCGCATGAGATCGGAAGAGCGGTTCAGCAGGAATGCCGAGACCGATCTCGTATGC	2	1	14:A>G	14	0.625000	0.800000	0.300000	0.700000	0.200000	0.100000	0.320000	0.420000	0.370000	5.362.500	4.560.000	117.599	-0.100000	-0.30627	2	0.00000	1.000.000	0.900000	0.950000	1.000.000	0.666667	2.000.000	3.000.000	1	0	1	0	-	0	-	1	0	-	0	-	-
100203342|F|0--18:A>T	100203342	35423	TGCAGAACCTCCCAAAACACACTTCGAGAGACACAATCGTTTCCTTCTCTAAGTTCATAAAGCGCATGT	TGCAGAACCTCCCAAAACWCAYTTCGAGAGACACAATCSTTTCCTTCTCTAAGTTCATAAAGCGCATGT	3	3		18	0.437500	0.571429	0.428571	0.571429	0.428571	0.000000	0.489796	0.489796	0.489796	3.100.000	1.380.000	224.638	-0.428571	-0.16821	3	-0.05860	1.000.000	1.000.000	1.000.000	1.000.000	1.000.000	2.000.000	2.000.000	-	1	-	1	-	0	-	0	1	-	1	-	-
100203342|F|0-18:A>T-18:A>T	100203342	35423	TGCAGAACCTCCCAAAACTCATTTCGAGAGACACAATCCTTTCCTTCTCTAAGTTCATAAAGCGCATGT	TGCAGAACCTCCCAAAACWCAYTTCGAGAGACACAATCSTTTCCTTCTCTAAGTTCATAAAGCGCATGT	3	3	18:A>T	18	0.437500	0.571429	0.428571	0.571429	0.428571	0.000000	0.489796	0.489796	0.489796	3.100.000	1.380.000	224.638	-0.428571	-0.16821	3	-0.05860	1.000.000	1.000.000	1.000.000	1.000.000	1.000.000	2.000.000	2.000.000	-	0	-	0	-	1	-	1	0	-	0	-	-
100203342|F|0--38:G>C	100203342	35423	TGCAGAACCTCCCAAAACACACTTCGAGAGACACAATCGTTTCCTTCTCTAAGTTCATAAAGCGCATGT	TGCAGAACCTCCCAAAACWCAYTTCGAGAGACACAATCSTTTCCTTCTCTAAGTTCATAAAGCGCATGT	3	1		38	0.437500	0.285714	0.714286	0.285714	0.714286	0.000000	0.408163	0.408163	0.408163	2.850.000	2.255.556	126.355	-0.285714	-0.18914	3	-0.04692	1.000.000	1.000.000	1.000.000	1.000.000	1.000.000	2.000.000	2.000.000	-	0	-	0	-	0	-	0	1	-	1	-	-
100203342|F|0-38:G>C-38:G>C	100203342	35423	TGCAGAACCTCCCAAAACACACTTCGAGAGACACAATCCTTTCCTTCTCTAAGTTCATAAAGCGCATGT	TGCAGAACCTCCCAAAACWCAYTTCGAGAGACACAATCSTTTCCTTCTCTAAGTTCATAAAGCGCATGT	3	1	38:G>C	38	0.437500	0.285714	0.714286	0.285714	0.714286	0.000000	0.408163	0.408163	0.408163	2.850.000	2.255.556	126.355	-0.285714	-0.18914	3	-0.04692	1.000.000	1.000.000	1.000.000	1.000.000	1.000.000	2.000.000	2.000.000	-	1	-	1	-	1	-	1	0	-	0	-	-
100203345|F|0--12:C>A	100203345	35424	TGCAGACACTTTCAGCAAGACCACAAACACAGAACCTTCTCACCTGGCAGCACAACCCGCAGCATGAGA	TGCAGACMCTTTMAGCAAGACCACAAACACARAACCTTCTCACCTGGCAGCACAACCCRCAGCATGAGA	3	3		12	0.437500	0.571429	0.428571	0.571429	0.428571	0.000000	0.489796	0.489796	0.489796	5.962.500	2.840.000	209.947	-0.428571	-0.16503	3	-0.00038	1.000.000	1.000.000	1.000.000	1.000.000	1.000.000	2.000.000	2.000.000	-	1	-	1	-	0	-	0	1	-	1	-	-
100203345|F|0-12:C>A-12:C>A	100203345	35424	TGCAGACACTTTAAGCAAGACCACAAACACAAAACCTTCTCACCTGGCAGCACAACCCACAGCATGAGA	TGCAGACMCTTTMAGCAAGACCACAAACACARAACCTTCTCACCTGGCAGCACAACCCRCAGCATGAGA	3	3	12:C>A	12	0.437500	0.571429	0.428571	0.571429	0.428571	0.000000	0.489796	0.489796	0.489796	5.962.500	2.840.000	209.947	-0.428571	-0.16503	3	-0.00038	1.000.000	1.000.000	1.000.000	1.000.000	1.000.000	2.000.000	2.000.000	-	0	-	0	-	1	-	1	0	-	0	-	-
100203441|F|0--54:C>T	100203441	35478	TGCAGAAATCATATTAGCCTGGAGTCGGTTACTGCACTAAAACATGATGTAATTCAATTGTTCCGAGTA	TGCAGAAATCATATTAGCCTGGAGTCGGTTACTGCACTAAAACATGATGTAATTYRATTGTTCMGAGTA	3	2		54	0.562500	0.666667	0.333333	0.666667	0.333333	0.000000	0.444444	0.444444	0.444444	690.909	633.333	109.091	-0.333333	-0.19357	3	-0.03486	1.000.000	1.000.000	1.000.000	1.000.000	1.000.000	0.000000	0.000000	-	1	-	1	-	1	-	1	1	0	1	0	0
100203441|F|0-54:C>T-54:C>T	100203441	35478	TGCAGAAATCATATTAGCCTGGAGTCGGTTACTGCACTAAAACATGATGTAATTTGATTGTTCCGAGTA	TGCAGAAATCATATTAGCCTGGAGTCGGTTACTGCACTAAAACATGATGTAATTYRATTGTTCMGAGTA	3	2	54:C>T	54	0.562500	0.666667	0.333333	0.666667	0.333333	0.000000	0.444444	0.444444	0.444444	690.909	633.333	109.091	-0.333333	-0.19357	3	-0.03486	1.000.000	1.000.000	1.000.000	1.000.000	1.000.000	0.000000	0.000000	-	0	-	0	-	0	-	0	0	1	0	1	1
100203442|F|0--63:A>C	100203442	35478	TGCAGAAATCATATTAGCCTGGAGTCGGTTACTGCACTAAAACATGATGTAATTCAATTGTTCAGAGTA	TGCAGAAATCATATTAGCCTGGAGTCGGTTACTGCACTAAAACATGATGTAATTYRATTGTTCMGAGTA	3	1		63	0.562500	0.222222	0.777778	0.222222	0.777778	0.000000	0.345679	0.345679	0.345679	766.667	654.545	117.130	-0.222222	-0.19971	3	-0.03484	1.000.000	1.000.000	1.000.000	1.000.000	1.000.000	1.000.000	1.000.000	-	0	-	0	-	1	-	1	0	0	0	0	0
100203442|F|0-63:A>C-63:A>C	100203442	35478	TGCAGAAATCATATTAGCCTGGAGTCGGTTACTGCACTAAAACATGATGTAATTCAATTGTTCCGAGTA	TGCAGAAATCATATTAGCCTGGAGTCGGTTACTGCACTAAAACATGATGTAATTYRATTGTTCMGAGTA	3	1	63:A>C	63	0.562500	0.222222	0.777778	0.222222	0.777778	0.000000	0.345679	0.345679	0.345679	766.667	654.545	117.130	-0.222222	-0.19971	3	-0.03484	1.000.000	1.000.000	1.000.000	1.000.000	1.000.000	1.000.000	1.000.000	-	1	-	1	-	0	-	0	1	1	1	1	1
100203446|F|0--48:A>C	100203446	35480	TGCAGAATCCGCTGTTGTTACTGGTAAATATGAAGGTTTAGAAGAAAAAAATTTAAAATGAAGTGCTAT	TGCAGAATCCGCTGTTGTTACTGGTAAATATGAAGGTTTAGAAGAAAAMMATTTWAAATGAAGTGCTAY	3	3		48	0.500000	0.750000	0.250000	0.750000	0.250000	0.000000	0.375000	0.375000	0.375000	318.182	250.000	127.273	-0.250000	-0.15892	3	-0.06685	1.000.000	1.000.000	1.000.000	1.000.000	1.000.000	0.000000	0.000000	-	1	-	1	-	1	-	1	1	-	1	0	0
100203446|F|0-48:A>C-48:A>C	100203446	35480	TGCAGAATCCGCTGTTGTTACTGGTAAATATGAAGGTTTAGAAGAAAACCATTTAAAATGAAGTGCTAC	TGCAGAATCCGCTGTTGTTACTGGTAAATATGAAGGTTTAGAAGAAAAMMATTTWAAATGAAGTGCTAY	3	3	48:A>C	48	0.500000	0.750000	0.250000	0.750000	0.250000	0.000000	0.375000	0.375000	0.375000	318.182	250.000	127.273	-0.250000	-0.15892	3	-0.06685	1.000.000	1.000.000	1.000.000	1.000.000	1.000.000	0.000000	0.000000	-	0	-	0	-	0	-	0	0	-	0	1	1
100203446|F|0--54:A>T	100203446	35480	TGCAGAATCCGCTGTTGTTACTGGTAAATATGAAGGTTTAGAAGAAAAAAATTTAAAATGAAGTGCTAT	TGCAGAATCCGCTGTTGTTACTGGTAAATATGAAGGTTTAGAAGAAAAMMATTTWAAATGAAGTGCTAY	3	1		54	0.500000	0.500000	0.500000	0.500000	0.500000	0.000000	0.500000	0.500000	0.500000	383.333	242.857	157.843	-0.500000	-0.20834	3	-0.03903	1.000.000	1.000.000	1.000.000	1.000.000	1.000.000	2.000.000	2.000.000	-	0	-	0	-	0	-	0	1	-	1	1	1
100203446|F|0-54:A>T-54:A>T	100203446	35480	TGCAGAATCCGCTGTTGTTACTGGTAAATATGAAGGTTTAGAAGAAAAAAATTTTAAATGAAGTGCTAT	TGCAGAATCCGCTGTTGTTACTGGTAAATATGAAGGTTTAGAAGAAAAMMATTTWAAATGAAGTGCTAY	3	1	54:A>T	54	0.500000	0.500000	0.500000	0.500000	0.500000	0.000000	0.500000	0.500000	0.500000	383.333	242.857	157.843	-0.500000	-0.20834	3	-0.03903	1.000.000	1.000.000	1.000.000	1.000.000	1.000.000	2.000.000	2.000.000	-	1	-	1	-	1	-	1	0	-	0	0	0
100203448|F|0--5:G>A	100203448	35481	TGCAGGATCTGGATGCCCTCCTTGACGTCGCGTAGCTGCTGGCTGTAGCGCTGGATCTTGCGCTCGATG	TGCAGRATCTGGATGCCCTCYTTGACGTCBCGYAGCTGCTGGCTGTAGCGCTGGATCTTGCGCTCGATG	3	4		5	0.562500	0.666667	0.333333	0.666667	0.333333	0.000000	0.444444	0.444444	0.444444	936.364	560.000	167.208	-0.333333	-0.20641	3	-0.06818	1.000.000	1.000.000	1.000.000	1.000.000	1.000.000	2.000.000	2.000.000	-	1	-	1	-	1	-	1	1	0	1	0	0
100203448|F|0-5:G>A-5:G>A	100203448	35481	TGCAGAATCTGGATGCCCTCTTTGACGTCCCGCAGCTGCTGGCTGTAGCGCTGGATCTTGCGCTCGATG	TGCAGRATCTGGATGCCCTCYTTGACGTCBCGYAGCTGCTGGCTGTAGCGCTGGATCTTGCGCTCGATG	3	4	5:G>A	5	0.562500	0.666667	0.333333	0.666667	0.333333	0.000000	0.444444	0.444444	0.444444	936.364	560.000	167.208	-0.333333	-0.20641	3	-0.06818	1.000.000	1.000.000	1.000.000	1.000.000	1.000.000	2.000.000	2.000.000	-	0	-	0	-	0	-	0	0	1	0	1	1
100203453|F|0--56:C>T	100203453	35483	TGCAGACAGCCTAATGGGCTAATTTGTAATTGGGAAAGGGAAATGAGTTAGCTAGCCGTGCCTTTGTTA	TGCAGACAGCCTAATGGGCTAATTTGTAATTGGGARAGGGAAATGAGTTAGCTAGCYGYGSCTTTGTTA	3	4		56	0.562500	0.666667	0.333333	0.666667	0.333333	0.000000	0.444444	0.444444	0.444444	1.841.667	1.766.667	104.245	-0.333333	-0.22343	3	-0.04075	1.000.000	1.000.000	1.000.000	1.000.000	1.000.000	0.000000	0.000000	-	1	-	1	-	1	-	1	1	0	1	0	0
100203453|F|0-56:C>T-56:C>T	100203453	35483	TGCAGACAGCCTAATGGGCTAATTTGTAATTGGGAGAGGGAAATGAGTTAGCTAGCTGCGGCTTTGTTA	TGCAGACAGCCTAATGGGCTAATTTGTAATTGGGARAGGGAAATGAGTTAGCTAGCYGYGSCTTTGTTA	3	4	56:C>T	56	0.562500	0.666667	0.333333	0.666667	0.333333	0.000000	0.444444	0.444444	0.444444	1.841.667	1.766.667	104.245	-0.333333	-0.22343	3	-0.04075	1.000.000	1.000.000	1.000.000	1.000.000	1.000.000	0.000000	0.000000	-	0	-	0	-	0	-	0	0	1	0	1	1
100203464|F|0--22:G>A	100203464	35489	TGCAGAGACAATGAGGTCTTTAGGCAGGCACGCCTGATAGTCCAGCCTTCATTTATTCATTTATCTTGT	TGCAGAGACAATGAGGTCTTTARGCRGGYACGCCTGATAGTCCAGCCTTCATTTATTCATTTATCTTGT	3	3		22	0.437500	0.571429	0.428571	0.571429	0.428571	0.000000	0.489796	0.489796	0.489796	1.750.000	900.000	194.444	-0.428571	-0.17591	3	-0.06807	1.000.000	1.000.000	1.000.000	1.000.000	1.000.000	1.000.000	1.000.000	-	1	-	1	-	-	-	-	1	0	1	0	0
100203464|F|0-22:G>A-22:G>A	100203464	35489	TGCAGAGACAATGAGGTCTTTAAGCGGGTACGCCTGATAGTCCAGCCTTCATTTATTCATTTATCTTGT	TGCAGAGACAATGAGGTCTTTARGCRGGYACGCCTGATAGTCCAGCCTTCATTTATTCATTTATCTTGT	3	3	22:G>A	22	0.437500	0.571429	0.428571	0.571429	0.428571	0.000000	0.489796	0.489796	0.489796	1.750.000	900.000	194.444	-0.428571	-0.17591	3	-0.06807	1.000.000	1.000.000	1.000.000	1.000.000	1.000.000	1.000.000	1.000.000	-	0	-	0	-	-	-	-	0	1	0	1	1
100203466|F|0--33:T>C	100203466	35490	TGCAGAGATGACAGGGGGAAAGCTTTATTGCTCTGAGTTTGTATCGATCGGGGCCCCTCACAGGGGGCA	TGCAGAGATGACAGGGGGAAAGCTTTATTGCTCYGAGTTTGTATCGATCGGGGCCCYTCACAGGGGGCA	3	1		33	0.937500	0.133333	0.866667	0.133333	0.866667	0.000000	0.231111	0.231111	0.231111	2.875.000	1.844.000	155.911	-0.133333	-0.49082	3	-0.10378	1.000.000	1.000.000	1.000.000	1.000.000	1.000.000	2.000.000	2.000.000	0	0	0	0	0	0	0	0	0	0	0	0	0
100203466|F|0-33:T>C-33:T>C	100203466	35490	TGCAGAGATGACAGGGGGAAAGCTTTATTGCTCCGAGTTTGTATCGATCGGGGCCCCTCACAGGGGGCA	TGCAGAGATGACAGGGGGAAAGCTTTATTGCTCYGAGTTTGTATCGATCGGGGCCCYTCACAGGGGGCA	3	1	33:T>C	33	0.937500	0.133333	0.866667	0.133333	0.866667	0.000000	0.231111	0.231111	0.231111	2.875.000	1.844.000	155.911	-0.133333	-0.49082	3	-0.10378	1.000.000	1.000.000	1.000.000	1.000.000	1.000.000	2.000.000	2.000.000	1	1	1	1	1	1	1	1	1	1	1	1	1
100203467|F|0--56:T>C	100203467	35490	TGCAGAGATGACAGGGGGAAAGCTTTATTGCTCCGAGTTTGTATCGATCGGGGCCCTTCACAGGGGGCA	TGCAGAGATGACAGGGGGAAAGCTTTATTGCTCYGAGTTTGTATCGATCGGGGCCCYTCACAGGGGGCA	3	1		56	0.937500	0.133333	0.866667	0.133333	0.866667	0.000000	0.231111	0.231111	0.231111	2.500.000	1.904.000	131.303	-0.133333	-0.48036	3	-0.09737	1.000.000	1.000.000	1.000.000	1.000.000	1.000.000	2.000.000	2.000.000	1	0	1	0	0	0	0	0	0	0	0	0	0
100203467|F|0-56:T>C-56:T>C	100203467	35490	TGCAGAGATGACAGGGGGAAAGCTTTATTGCTCCGAGTTTGTATCGATCGGGGCCCCTCACAGGGGGCA	TGCAGAGATGACAGGGGGAAAGCTTTATTGCTCYGAGTTTGTATCGATCGGGGCCCYTCACAGGGGGCA	3	1	56:T>C	56	0.937500	0.133333	0.866667	0.133333	0.866667	0.000000	0.231111	0.231111	0.231111	2.500.000	1.904.000	131.303	-0.133333	-0.48036	3	-0.09737	1.000.000	1.000.000	1.000.000	1.000.000	1.000.000	2.000.000	2.000.000	0	1	0	1	1	1	1	1	1	1	1	1	1
100203491|F|0--30:G>A	100203491	35501	TGCAGCAAATTGTATAGCCTTTTCTAGCAAGCTACGAACGGCTGGATATTATGAGCTTTCTGTACAGGC	TGCAGCAAATTGTATAGCCTTTTCTAGCAARCTACGAAYGGCTGGATATTATGAGCTTTCTSTACAGGC	3	2		30	0.500000	0.500000	0.500000	0.500000	0.500000	0.000000	0.500000	0.500000	0.500000	500.000	457.143	109.375	-0.500000	-0.17357	3	-0.01990	1.000.000	1.000.000	1.000.000	1.000.000	1.000.000	2.000.000	2.000.000	-	1	-	1	-	0	-	0	0	-	0	1	1
100203491|F|0-30:G>A-30:G>A	100203491	35501	TGCAGCAAATTGTATAGCCTTTTCTAGCAAACTACGAATGGCTGGATATTATGAGCTTTCTGTACAGGC	TGCAGCAAATTGTATAGCCTTTTCTAGCAARCTACGAAYGGCTGGATATTATGAGCTTTCTSTACAGGC	3	2	30:G>A	30	0.500000	0.500000	0.500000	0.500000	0.500000	0.000000	0.500000	0.500000	0.500000	500.000	457.143	109.375	-0.500000	-0.17357	3	-0.01990	1.000.000	1.000.000	1.000.000	1.000.000	1.000.000	2.000.000	2.000.000	-	0	-	0	-	1	-	1	1	-	1	0	0
100203494|F|0--10:T>C	100203494	35502	TGCAGCAACCTCGCATTGGGAAACCTAAGATCTTTTAATTAGGAGTAAGAGTGTCATTAATTACCTTTT	TGCAGCAACCYCGCRTTGGGAAACCTAAGATCTTTTAATTAGGAGTAAGAGTGTCATTAATTACCTTTT	3	1		10	0.500000	0.750000	0.250000	0.750000	0.250000	0.000000	0.375000	0.375000	0.375000	1.020.000	600.000	170.000	-0.250000	-0.17363	3	-0.02338	1.000.000	1.000.000	1.000.000	1.000.000	1.000.000	1.000.000	1.000.000	-	1	-	1	-	0	-	0	1	-	1	1	1
100203494|F|0-10:T>C-10:T>C	100203494	35502	TGCAGCAACCCCGCATTGGGAAACCTAAGATCTTTTAATTAGGAGTAAGAGTGTCATTAATTACCTTTT	TGCAGCAACCYCGCRTTGGGAAACCTAAGATCTTTTAATTAGGAGTAAGAGTGTCATTAATTACCTTTT	3	1	10:T>C	10	0.500000	0.750000	0.250000	0.750000	0.250000	0.000000	0.375000	0.375000	0.375000	1.020.000	600.000	170.000	-0.250000	-0.17363	3	-0.02338	1.000.000	1.000.000	1.000.000	1.000.000	1.000.000	1.000.000	1.000.000	-	0	-	0	-	1	-	1	0	-	0	0	0
100203495|F|0--14:G>A	100203495	35502	TGCAGCAACCTCGCGTTGGGAAACCTAAGATCTTTTAATTAGGAGTAAGAGTGTCATTAATTACCTTTT	TGCAGCAACCYCGCRTTGGGAAACCTAAGATCTTTTAATTAGGAGTAAGAGTGTCATTAATTACCTTTT	3	1		14	0.500000	0.250000	0.750000	0.250000	0.750000	0.000000	0.375000	0.375000	0.375000	1.150.000	881.818	130.412	-0.250000	-0.15682	3	-0.02509	1.000.000	1.000.000	1.000.000	1.000.000	1.000.000	0.000000	0.000000	-	0	-	0	-	0	-	0	0	-	0	1	1
100203495|F|0-14:G>A-14:G>A	100203495	35502	TGCAGCAACCTCGCATTGGGAAACCTAAGATCTTTTAATTAGGAGTAAGAGTGTCATTAATTACCTTTT	TGCAGCAACCYCGCRTTGGGAAACCTAAGATCTTTTAATTAGGAGTAAGAGTGTCATTAATTACCTTTT	3	1	14:G>A	14	0.500000	0.250000	0.750000	0.250000	0.750000	0.000000	0.375000	0.375000	0.375000	1.150.000	881.818	130.412	-0.250000	-0.15682	3	-0.02509	1.000.000	1.000.000	1.000.000	1.000.000	1.000.000	0.000000	0.000000	-	1	-	1	-	1	-	1	1	-	1	0	0
100203504|F|0--22:A>G	100203504	35506	TGCAGCAGCAGCTGTTACAGGAACAGGCTCTCCTCCTGGTAAAGGAGTGTGGGTTGGCTCCACCCACTT	TGCAGCAGCAGCTGTTACAGGARCAGGCTCTCCTCCTGGTAAAGGAGTGTGGGKTGGCTCCACCYRCTT	3	3		22	0.437500	0.571429	0.428571	0.571429	0.428571	0.000000	0.489796	0.489796	0.489796	1.275.000	560.000	227.679	-0.428571	-0.18623	3	-0.03041	1.000.000	1.000.000	1.000.000	1.000.000	1.000.000	1.000.000	1.000.000	-	1	-	1	-	-	-	-	1	0	1	0	0
100203504|F|0-22:A>G-22:A>G	100203504	35506	TGCAGCAGCAGCTGTTACAGGAGCAGGCTCTCCTCCTGGTAAAGGAGTGTGGGGTGGCTCCACCTACTT	TGCAGCAGCAGCTGTTACAGGARCAGGCTCTCCTCCTGGTAAAGGAGTGTGGGKTGGCTCCACCYRCTT	3	3	22:A>G	22	0.437500	0.571429	0.428571	0.571429	0.428571	0.000000	0.489796	0.489796	0.489796	1.275.000	560.000	227.679	-0.428571	-0.18623	3	-0.03041	1.000.000	1.000.000	1.000.000	1.000.000	1.000.000	1.000.000	1.000.000	-	0	-	0	-	-	-	-	0	1	0	1	1
100203508|F|0--57:G>A	100203508	35508	TGCAGCAGGGCCCAGTCCTCGCTGATGAGCCACTCGGGGCTGTCCTGGCCAGGCTCCGTGGCAGGCTTG	TGCAGCAGGGCCCAGTCCTCGCTGATGAGCCACTCGGGGCTGTCYTGGCCAGGCTCCRTGGYRGGCTTG	3	3		57	0.500000	0.500000	0.500000	0.500000	0.500000	0.000000	0.500000	0.500000	0.500000	425.000	400.000	106.250	-0.500000	-0.21212	3	-0.07684	1.000.000	1.000.000	1.000.000	1.000.000	1.000.000	1.000.000	1.000.000	-	1	-	1	-	0	-	0	1	-	1	0	0
100203508|F|0-57:G>A-57:G>A	100203508	35508	TGCAGCAGGGCCCAGTCCTCGCTGATGAGCCACTCGGGGCTGTCCTGGCCAGGCTCCATGGTGGGCTTG	TGCAGCAGGGCCCAGTCCTCGCTGATGAGCCACTCGGGGCTGTCYTGGCCAGGCTCCRTGGYRGGCTTG	3	3	57:G>A	57	0.500000	0.500000	0.500000	0.500000	0.500000	0.000000	0.500000	0.500000	0.500000	425.000	400.000	106.250	-0.500000	-0.21212	3	-0.07684	1.000.000	1.000.000	1.000.000	1.000.000	1.000.000	1.000.000	1.000.000	-	0	-	0	-	1	-	1	0	-	0	1	1
100203513|F|0--11:C>G	100203513	35510	TGCAGCAGGTCCACGGTGCGCTTGAGGAAGCAGCGGCCCGGCATGTCCGTGTCCTTGTAGTAGCGCATG	TGCAGCAGGTCSACGGTGCGCTTGAGGAARCAGCGGCCCGGCATGTCCGTGTCCTTGTAGWAGCGCATG	3	2		11	0.562500	0.666667	0.333333	0.666667	0.333333	0.000000	0.444444	0.444444	0.444444	709.091	366.667	193.388	-0.333333	-0.17241	3	-0.03798	1.000.000	1.000.000	1.000.000	1.000.000	1.000.000	0.000000	0.000000	-	1	-	1	-	1	-	1	1	0	1	0	0
100203513|F|0-11:C>G-11:C>G	100203513	35510	TGCAGCAGGTCGACGGTGCGCTTGAGGAAACAGCGGCCCGGCATGTCCGTGTCCTTGTAGTAGCGCATG	TGCAGCAGGTCSACGGTGCGCTTGAGGAARCAGCGGCCCGGCATGTCCGTGTCCTTGTAGWAGCGCATG	3	2	11:C>G	11	0.562500	0.666667	0.333333	0.666667	0.333333	0.000000	0.444444	0.444444	0.444444	709.091	366.667	193.388	-0.333333	-0.17241	3	-0.03798	1.000.000	1.000.000	1.000.000	1.000.000	1.000.000	0.000000	0.000000	-	0	-	0	-	0	-	0	0	1	0	1	1
100203520|F|0--6:A>G	100203520	35513	TGCAGCATTCATTTAGAAATGCTCGAAGCAATATTCTTAGTCAGCATTATGAAAATATCACAAGCTAAA	TGCAGCRTYCATTTAGAAATGCTCGAAGCAATATTCTTAGTCAGCATTATGAAAATATCACAAGCWAAA	3	2		6	0.500000	0.250000	0.750000	0.250000	0.750000	0.000000	0.375000	0.375000	0.375000	1.100.000	441.667	249.057	-0.250000	-0.15792	3	-0.02456	1.000.000	1.000.000	1.000.000	1.000.000	1.000.000	0.000000	0.000000	-	0	-	0	-	0	-	0	0	-	0	1	1
100203520|F|0-6:A>G-6:A>G	100203520	35513	TGCAGCGTTCATTTAGAAATGCTCGAAGCAATATTCTTAGTCAGCATTATGAAAATATCACAAGCAAAA	TGCAGCRTYCATTTAGAAATGCTCGAAGCAATATTCTTAGTCAGCATTATGAAAATATCACAAGCWAAA	3	2	6:A>G	6	0.500000	0.250000	0.750000	0.250000	0.750000	0.000000	0.375000	0.375000	0.375000	1.100.000	441.667	249.057	-0.250000	-0.15792	3	-0.02456	1.000.000	1.000.000	1.000.000	1.000.000	1.000.000	0.000000	0.000000	-	1	-	1	-	1	-	1	1	-	1	0	0
100203521|F|0--8:C>T	100203521	35513	TGCAGCGTCCATTTAGAAATGCTCGAAGCAATATTCTTAGTCAGCATTATGAAAATATCACAAGCAAAA	TGCAGCRTYCATTTAGAAATGCTCGAAGCAATATTCTTAGTCAGCATTATGAAAATATCACAAGCWAAA	3	1		8	0.500000	0.125000	0.875000	0.125000	0.875000	0.000000	0.218750	0.218750	0.218750	650.000	516.667	125.806	-0.125000	-0.14788	3	-0.01759	1.000.000	1.000.000	1.000.000	1.000.000	1.000.000	1.000.000	1.000.000	-	0	-	0	-	0	-	0	1	-	0	0	0
100203521|F|0-8:C>T-8:C>T	100203521	35513	TGCAGCGTTCATTTAGAAATGCTCGAAGCAATATTCTTAGTCAGCATTATGAAAATATCACAAGCAAAA	TGCAGCRTYCATTTAGAAATGCTCGAAGCAATATTCTTAGTCAGCATTATGAAAATATCACAAGCWAAA	3	1	8:C>T	8	0.500000	0.125000	0.875000	0.125000	0.875000	0.000000	0.218750	0.218750	0.218750	650.000	516.667	125.806	-0.125000	-0.14788	3	-0.01759	1.000.000	1.000.000	1.000.000	1.000.000	1.000.000	1.000.000	1.000.000	-	1	-	1	-	1	-	1	0	-	1	1	1
100203534|F|0--18:G>A	100203534	35520	TGCAGCGCCATAAAACCCGTCTTGATACACCACGCTGAGAGAGGTACACCAAACGAAGGAGAGGGAGTG	TGCAGCGCCATAAAACCCRTCTTGATACACCACGCTGAGAGAGGWACACMAAAYGAAGGAGAGGGAGTG	3	3		18	0.500000	0.750000	0.250000	0.750000	0.250000	0.000000	0.375000	0.375000	0.375000	1.441.667	550.000	262.121	-0.250000	-0.17588	3	-0.03471	1.000.000	1.000.000	1.000.000	1.000.000	1.000.000	0.000000	0.000000	-	1	-	1	-	1	-	1	1	-	1	0	0
100203534|F|0-18:G>A-18:G>A	100203534	35520	TGCAGCGCCATAAAACCCATCTTGATACACCACGCTGAGAGAGGAACACAAAACGAAGGAGAGGGAGTG	TGCAGCGCCATAAAACCCRTCTTGATACACCACGCTGAGAGAGGWACACMAAAYGAAGGAGAGGGAGTG	3	3	18:G>A	18	0.500000	0.750000	0.250000	0.750000	0.250000	0.000000	0.375000	0.375000	0.375000	1.441.667	550.000	262.121	-0.250000	-0.17588	3	-0.03471	1.000.000	1.000.000	1.000.000	1.000.000	1.000.000	0.000000	0.000000	-	0	-	0	-	0	-	0	0	-	0	1	1
100203534|F|0--53:C>T	100203534	35520	TGCAGCGCCATAAAACCCGTCTTGATACACCACGCTGAGAGAGGTACACCAAACGAAGGAGAGGGAGTG	TGCAGCGCCATAAAACCCRTCTTGATACACCACGCTGAGAGAGGWACACMAAAYGAAGGAGAGGGAGTG	3	1		53	0.500000	0.750000	0.250000	0.750000	0.250000	0.000000	0.375000	0.375000	0.375000	1.450.000	975.000	148.718	-0.250000	-0.18784	3	-0.01592	1.000.000	1.000.000	1.000.000	1.000.000	1.000.000	2.000.000	2.000.000	-	1	-	1	-	0	-	0	1	-	1	1	1
100203534|F|0-53:C>T-53:C>T	100203534	35520	TGCAGCGCCATAAAACCCGTCTTGATACACCACGCTGAGAGAGGTACACCAAATGAAGGAGAGGGAGTG	TGCAGCGCCATAAAACCCRTCTTGATACACCACGCTGAGAGAGGWACACMAAAYGAAGGAGAGGGAGTG	3	1	53:C>T	53	0.500000	0.750000	0.250000	0.750000	0.250000	0.000000	0.375000	0.375000	0.375000	1.450.000	975.000	148.718	-0.250000	-0.18784	3	-0.01592	1.000.000	1.000.000	1.000.000	1.000.000	1.000.000	2.000.000	2.000.000	-	0	-	0	-	1	-	1	0	-	0	0	0
100203545|F|0--10:C>T	100203545	35525	TGCAGCTCTCCTCCAGACCTGACATGCAGTACTCCTCTGACCTCTGATCTCTTCACCTCTGACCTAAGC	TGCAGCTCTCYTCCAGACCTGACATGCAGTACTCCWCTGACCTCTGAYCTCTTCACCTCTGACCTAAGC	3	2		10	0.562500	0.666667	0.333333	0.666667	0.333333	0.000000	0.444444	0.444444	0.444444	2.600.000	1.680.000	154.762	-0.333333	-0.24336	3	-0.05864	1.000.000	1.000.000	1.000.000	1.000.000	1.000.000	2.000.000	2.000.000	-	1	-	1	-	1	-	1	1	0	1	0	0
100203545|F|0-10:C>T-10:C>T	100203545	35525	TGCAGCTCTCTTCCAGACCTGACATGCAGTACTCCTCTGACCTCTGACCTCTTCACCTCTGACCTAAGC	TGCAGCTCTCYTCCAGACCTGACATGCAGTACTCCWCTGACCTCTGAYCTCTTCACCTCTGACCTAAGC	3	2	10:C>T	10	0.562500	0.666667	0.333333	0.666667	0.333333	0.000000	0.444444	0.444444	0.444444	2.600.000	1.680.000	154.762	-0.333333	-0.24336	3	-0.05864	1.000.000	1.000.000	1.000.000	1.000.000	1.000.000	2.000.000	2.000.000	-	0	-	0	-	0	-	0	0	1	0	1	1
100203559|F|0--11:G>A	100203559	35531	TGCAGCTGGGTGAGTTTAAGTCGTATTTTGTCATCATCCAGACGGCGCTTGGCCTCACAGCCGCACCCA	TGCAGCTGGGTRAGYTTAAGTCGTATTTTGTCATCATCCAGACGGCGCTTGGCCTCRCAGCCGCACCCA	3	3		11	0.437500	0.857143	0.142857	0.857143	0.142857	0.000000	0.244898	0.244898	0.244898	1.318.182	700.000	188.312	-0.142857	-0.13204	2	0.00000	1.000.000	1.000.000	1.000.000	1.000.000	1.000.000	1.000.000	1.000.000	-	1	-	1	-	1	-	1	1	0	1	-	-
100203559|F|0-11:G>A-11:G>A	100203559	35531	TGCAGCTGGGTAAGCTTAAGTCGTATTTTGTCATCATCCAGACGGCGCTTGGCCTCGCAGCCGCACCCA	TGCAGCTGGGTRAGYTTAAGTCGTATTTTGTCATCATCCAGACGGCGCTTGGCCTCRCAGCCGCACCCA	3	3	11:G>A	11	0.437500	0.857143	0.142857	0.857143	0.142857	0.000000	0.244898	0.244898	0.244898	1.318.182	700.000	188.312	-0.142857	-0.13204	2	0.00000	1.000.000	1.000.000	1.000.000	1.000.000	1.000.000	1.000.000	1.000.000	-	0	-	0	-	0	-	0	0	1	0	-	-
100203559|F|0--14:T>C	100203559	35531	TGCAGCTGGGTGAGTTTAAGTCGTATTTTGTCATCATCCAGACGGCGCTTGGCCTCACAGCCGCACCCA	TGCAGCTGGGTRAGYTTAAGTCGTATTTTGTCATCATCCAGACGGCGCTTGGCCTCRCAGCCGCACCCA	3	2		14	0.562500	0.666667	0.333333	0.666667	0.333333	0.000000	0.444444	0.444444	0.444444	1.318.182	775.000	170.088	-0.333333	-0.20780	3	-0.05304	1.000.000	1.000.000	1.000.000	1.000.000	1.000.000	1.000.000	1.000.000	-	1	-	1	-	1	-	1	1	0	1	0	0
100203559|F|0-14:T>C-14:T>C	100203559	35531	TGCAGCTGGGTGAGCTTAAGTCGTATTTTGTCATCATCCAGACGGCGCTTGGCCTCGCAGCCGCACCCA	TGCAGCTGGGTRAGYTTAAGTCGTATTTTGTCATCATCCAGACGGCGCTTGGCCTCRCAGCCGCACCCA	3	2	14:T>C	14	0.562500	0.666667	0.333333	0.666667	0.333333	0.000000	0.444444	0.444444	0.444444	1.318.182	775.000	170.088	-0.333333	-0.20780	3	-0.05304	1.000.000	1.000.000	1.000.000	1.000.000	1.000.000	1.000.000	1.000.000	-	0	-	0	-	0	-	0	0	1	0	1	1
100203563|F|0--16:C>T	100203563	35533	TGCAGCTTGTATCTGCCGCCGTGAATAGAGCAGCTCTCTGCCTGTCACTTAGCTGATAGGCTGATGAGG	TGCAGCTTGTATCTGCYGYYSTGAATAGAGCAGCTCTCTGCCTGTCASTTAGCTGATAGGCTGATGAGG	3	5		16	0.812500	0.307692	0.692308	0.307692	0.692308	0.000000	0.426036	0.426036	0.426036	662.500	468.750	141.333	-0.307692	-0.45597	3	-0.09371	1.000.000	1.000.000	1.000.000	1.000.000	1.000.000	4.000.000	4.000.000	1	0	1	0	1	0	1	0	0	0	0	0	0
100203563|F|0-16:C>T-16:C>T	100203563	35533	TGCAGCTTGTATCTGCTGTTCTGAATAGAGCAGCTCTCTGCCTGTCAGTTAGCTGATAGGCTGATGAGG	TGCAGCTTGTATCTGCYGYYSTGAATAGAGCAGCTCTCTGCCTGTCASTTAGCTGATAGGCTGATGAGG	3	5	16:C>T	16	0.812500	0.307692	0.692308	0.307692	0.692308	0.000000	0.426036	0.426036	0.426036	662.500	468.750	141.333	-0.307692	-0.45597	3	-0.09371	1.000.000	1.000.000	1.000.000	1.000.000	1.000.000	4.000.000	4.000.000	0	1	0	1	0	1	0	1	1	1	1	1	1
100203577|F|0--49:G>C	100203577	35539	TGCAGGAGTCTAACAGCTCAGAAGAATCAGATTGCGATGAGCTAGACCCGCAAACTAGCATGGAGGTAG	TGCAGGAGTCTAACAGCTCAGAAGAATCAGATTGCGATGAGCTAGACCCSMAAACTAGCATGGAGGTAG	3	2		49	0.562500	0.444444	0.555556	0.444444	0.555556	0.000000	0.493827	0.493827	0.493827	2.337.500	1.600.000	146.094	-0.444444	-0.25892	3	-0.07083	1.000.000	1.000.000	1.000.000	1.000.000	1.000.000	4.000.000	4.000.000	-	1	-	1	-	0	-	0	1	0	1	0	0
100203577|F|0-49:G>C-49:G>C	100203577	35539	TGCAGGAGTCTAACAGCTCAGAAGAATCAGATTGCGATGAGCTAGACCCCAAAACTAGCATGGAGGTAG	TGCAGGAGTCTAACAGCTCAGAAGAATCAGATTGCGATGAGCTAGACCCSMAAACTAGCATGGAGGTAG	3	2	49:G>C	49	0.562500	0.444444	0.555556	0.444444	0.555556	0.000000	0.493827	0.493827	0.493827	2.337.500	1.600.000	146.094	-0.444444	-0.25892	3	-0.07083	1.000.000	1.000.000	1.000.000	1.000.000	1.000.000	4.000.000	4.000.000	-	0	-	0	-	1	-	1	0	1	0	1	1
100203615|F|0--7:A>G	100203615	35556	TGCAGGGACCGCACCAGTCCGTTTGTTGGTTGAGGCCGAAGCGAGCTCGGCATTTCTTAGGTGAGCCAG	TGCAGGGRCCGCACCAGTCCGTTTGTTGGTTGAGGCCGAAGCGAGCTCGGCATTTCTTAGGYGAGCCRG	3	3		7	0.500000	0.625000	0.375000	0.625000	0.375000	0.000000	0.468750	0.468750	0.468750	1.444.444	975.000	148.148	-0.375000	-0.18909	3	-0.03357	1.000.000	1.000.000	1.000.000	1.000.000	1.000.000	1.000.000	1.000.000	1	-	1	-	1	-	1	1	-	0	-	0	0
100203615|F|0-7:A>G-7:A>G	100203615	35556	TGCAGGGGCCGCACCAGTCCGTTTGTTGGTTGAGGCCGAAGCGAGCTCGGCATTTCTTAGGCGAGCCGG	TGCAGGGRCCGCACCAGTCCGTTTGTTGGTTGAGGCCGAAGCGAGCTCGGCATTTCTTAGGYGAGCCRG	3	3	7:A>G	7	0.500000	0.625000	0.375000	0.625000	0.375000	0.000000	0.468750	0.468750	0.468750	1.444.444	975.000	148.148	-0.375000	-0.18909	3	-0.03357	1.000.000	1.000.000	1.000.000	1.000.000	1.000.000	1.000.000	1.000.000	0	-	0	-	0	-	0	0	-	1	-	1	1
100203629|F|0--15:C>A	100203629	35563	TGCAGGTGATGGAGACAGGCTACAAGCGCCTCACTCCTGAGCAGCCAGTAGGCCTGAGGCATGAGATCG	TGCAGGTGATGGAGAMRGGCTACAAGCGCCTCACTCCTRASCAGCCAGTAGGCCTGAGGCATGAGATCG	3	3		15	0.500000	0.750000	0.250000	0.750000	0.250000	0.000000	0.375000	0.375000	0.375000	3.650.000	3.050.000	119.672	-0.250000	-0.17586	3	-0.02982	1.000.000	1.000.000	1.000.000	1.000.000	1.000.000	1.000.000	1.000.000	-	1	-	1	-	1	-	1	1	-	1	0	0
100203629|F|0-15:C>A-15:C>A	100203629	35563	TGCAGGTGATGGAGAAGGGCTACAAGCGCCTCACTCCTGACCAGCCAGTAGGCCTGAGGCATGAGATCG	TGCAGGTGATGGAGAMRGGCTACAAGCGCCTCACTCCTRASCAGCCAGTAGGCCTGAGGCATGAGATCG	3	3	15:C>A	15	0.500000	0.750000	0.250000	0.750000	0.250000	0.000000	0.375000	0.375000	0.375000	3.650.000	3.050.000	119.672	-0.250000	-0.17586	3	-0.02982	1.000.000	1.000.000	1.000.000	1.000.000	1.000.000	1.000.000	1.000.000	-	0	-	0	-	0	-	0	0	-	0	1	1
100203629|F|0--38:G>A	100203629	35563	TGCAGGTGATGGAGACAGGCTACAAGCGCCTCACTCCTGAGCAGCCAGTAGGCCTGAGGCATGAGATCG	TGCAGGTGATGGAGAMRGGCTACAAGCGCCTCACTCCTRASCAGCCAGTAGGCCTGAGGCATGAGATCG	3	1		38	0.500000	0.750000	0.250000	0.750000	0.250000	0.000000	0.375000	0.375000	0.375000	4.025.000	1.925.000	209.091	-0.250000	-0.20126	3	-0.02985	1.000.000	1.000.000	1.000.000	1.000.000	1.000.000	2.000.000	2.000.000	-	1	-	1	-	0	-	0	1	-	1	1	1
100203629|F|0-38:G>A-38:G>A	100203629	35563	TGCAGGTGATGGAGACAGGCTACAAGCGCCTCACTCCTAAGCAGCCAGTAGGCCTGAGGCATGAGATCG	TGCAGGTGATGGAGAMRGGCTACAAGCGCCTCACTCCTRASCAGCCAGTAGGCCTGAGGCATGAGATCG	3	1	38:G>A	38	0.500000	0.750000	0.250000	0.750000	0.250000	0.000000	0.375000	0.375000	0.375000	4.025.000	1.925.000	209.091	-0.250000	-0.20126	3	-0.02985	1.000.000	1.000.000	1.000.000	1.000.000	1.000.000	2.000.000	2.000.000	-	0	-	0	-	1	-	1	0	-	0	0	0
100203634|F|0--42:A>G	100203634	35566	TGCAGGTTCCTGTTTGCTTGCCCATCCTGTGCCGTCTTTGGGAACGAGCGAGACGTTGGGGTCGTTGCC	TGCAGGTTCCTGTTTGCTTGCCCATCCTGTGCCGTCTTTGGGRACRAGYGWGACGTTGGGGTCGTTGCC	3	1		42	0.500000	0.500000	0.500000	0.500000	0.500000	0.000000	0.500000	0.500000	0.500000	362.500	233.333	155.357	-0.500000	-0.22615	3	-0.04395	1.000.000	1.000.000	1.000.000	1.000.000	1.000.000	2.000.000	2.000.000	1	-	1	-	0	-	0	-	-	-	-	0	0
100203634|F|0-42:A>G-42:A>G	100203634	35566	TGCAGGTTCCTGTTTGCTTGCCCATCCTGTGCCGTCTTTGGGGACGAGCGAGACGTTGGGGTCGTTGCC	TGCAGGTTCCTGTTTGCTTGCCCATCCTGTGCCGTCTTTGGGRACRAGYGWGACGTTGGGGTCGTTGCC	3	1	42:A>G	42	0.500000	0.500000	0.500000	0.500000	0.500000	0.000000	0.500000	0.500000	0.500000	362.500	233.333	155.357	-0.500000	-0.22615	3	-0.04395	1.000.000	1.000.000	1.000.000	1.000.000	1.000.000	2.000.000	2.000.000	0	-	0	-	1	-	1	-	-	-	-	1	1
100203665|F|0--20:A>G	100203665	35581	TGCAGTCCTGATTTTTTTCCAAGACCCTGCTGGGAGAATTGGGTTGAAGTCAGGCTATTTGAGGGAATG	TGCAGTCCTGATTTTTTTCCRAGACCCTGCTGGGAGAATTGGGKTGAARTCAGGCTATTTSWGGGAATG	3	5		20	0.500000	0.250000	0.750000	0.250000	0.750000	0.000000	0.375000	0.375000	0.375000	1.650.000	1.375.000	120.000	-0.250000	-0.17172	3	-0.07704	1.000.000	1.000.000	1.000.000	1.000.000	1.000.000	0.000000	0.000000	-	0	-	0	-	0	-	0	0	-	0	1	1
100203665|F|0-20:A>G-20:A>G	100203665	35581	TGCAGTCCTGATTTTTTTCCGAGACCCTGCTGGGAGAATTGGGGTGAAATCAGGCTATTTCTGGGAATG	TGCAGTCCTGATTTTTTTCCRAGACCCTGCTGGGAGAATTGGGKTGAARTCAGGCTATTTSWGGGAATG	3	5	20:A>G	20	0.500000	0.250000	0.750000	0.250000	0.750000	0.000000	0.375000	0.375000	0.375000	1.650.000	1.375.000	120.000	-0.250000	-0.17172	3	-0.07704	1.000.000	1.000.000	1.000.000	1.000.000	1.000.000	0.000000	0.000000	-	1	-	1	-	1	-	1	1	-	1	0	0
100203666|F|0--60:C>G	100203666	35581	TGCAGTCCTGATTTTTTTCCGAGACCCTGCTGGGAGAATTGGGGTGAAATCAGGCTATTTCTGGGAATG	TGCAGTCCTGATTTTTTTCCRAGACCCTGCTGGGAGAATTGGGKTGAARTCAGGCTATTTSWGGGAATG	3	2		60	0.500000	0.250000	0.750000	0.250000	0.750000	0.000000	0.375000	0.375000	0.375000	1.650.000	1.320.000	125.000	-0.250000	-0.21783	3	-0.03471	1.000.000	1.000.000	1.000.000	1.000.000	1.000.000	2.000.000	2.000.000	-	0	-	0	-	0	-	0	1	-	1	0	0
100203666|F|0-60:C>G-60:C>G	100203666	35581	TGCAGTCCTGATTTTTTTCCGAGACCCTGCTGGGAGAATTGGGGTGAAATCAGGCTATTTGAGGGAATG	TGCAGTCCTGATTTTTTTCCRAGACCCTGCTGGGAGAATTGGGKTGAARTCAGGCTATTTSWGGGAATG	3	2	60:C>G	60	0.500000	0.250000	0.750000	0.250000	0.750000	0.000000	0.375000	0.375000	0.375000	1.650.000	1.320.000	125.000	-0.250000	-0.21783	3	-0.03471	1.000.000	1.000.000	1.000.000	1.000.000	1.000.000	2.000.000	2.000.000	-	1	-	1	-	1	-	1	0	-	0	1	1
100203668|F|0--11:C>G	100203668	35582	TGCAGTCTAATCACACAAACTTTGTCTTGACAGCATACTTACAAAGTGGTACATCCAGCATCACCCACA	TGCAGTCTAATSAYACAAACTTTGTCTTGACAGCATACTTACAAAGYGRTACATCCASCATCACCCACA	3	5		11	0.437500	0.857143	0.142857	0.857143	0.142857	0.000000	0.244898	0.244898	0.244898	6.908.333	1.800.000	383.796	-0.142857	-0.15316	2	0.00000	1.000.000	1.000.000	1.000.000	1.000.000	1.000.000	1.000.000	1.000.000	-	1	-	1	-	1	-	1	1	0	1	-	-
100203668|F|0-11:C>G-11:C>G	100203668	35582	TGCAGTCTAATGATACAAACTTTGTCTTGACAGCATACTTACAAAGCGATACATCCACCATCACCCACA	TGCAGTCTAATSAYACAAACTTTGTCTTGACAGCATACTTACAAAGYGRTACATCCASCATCACCCACA	3	5	11:C>G	11	0.437500	0.857143	0.142857	0.857143	0.142857	0.000000	0.244898	0.244898	0.244898	6.908.333	1.800.000	383.796	-0.142857	-0.15316	2	0.00000	1.000.000	1.000.000	1.000.000	1.000.000	1.000.000	1.000.000	1.000.000	-	0	-	0	-	0	-	0	0	1	0	-	-
100203668|F|0--46:T>C	100203668	35582	TGCAGTCTAATCACACAAACTTTGTCTTGACAGCATACTTACAAAGTGGTACATCCAGCATCACCCACA	TGCAGTCTAATSAYACAAACTTTGTCTTGACAGCATACTTACAAAGYGRTACATCCASCATCACCCACA	3	3		46	0.562500	0.666667	0.333333	0.666667	0.333333	0.000000	0.444444	0.444444	0.444444	6.908.333	3.983.333	173.431	-0.333333	-0.20972	3	-0.02977	1.000.000	1.000.000	1.000.000	1.000.000	1.000.000	2.000.000	2.000.000	-	1	-	1	-	1	-	1	1	0	1	0	0
100203668|F|0-46:T>C-46:T>C	100203668	35582	TGCAGTCTAATCACACAAACTTTGTCTTGACAGCATACTTACAAAGCGATACATCCACCATCACCCACA	TGCAGTCTAATSAYACAAACTTTGTCTTGACAGCATACTTACAAAGYGRTACATCCASCATCACCCACA	3	3	46:T>C	46	0.562500	0.666667	0.333333	0.666667	0.333333	0.000000	0.444444	0.444444	0.444444	6.908.333	3.983.333	173.431	-0.333333	-0.20972	3	-0.02977	1.000.000	1.000.000	1.000.000	1.000.000	1.000.000	2.000.000	2.000.000	-	0	-	0	-	0	-	0	0	1	0	1	1
100203673|F|0--5:A>T	100203673	35584	TGCAGAGAATGTGTAATTACTTTTGTGTTCAAAGCAGAACTTTCAGCGTAGGATCACACGCAGACACAA	TGCAGWGAATGTGTAATTACTTTTGTGTTCAAAGCAGAACTTTCAGCGTAGGATCACAYRCAGACACAA	3	2		5	0.500000	0.750000	0.250000	0.750000	0.250000	0.000000	0.375000	0.375000	0.375000	958.333	933.333	102.679	-0.250000	-0.18985	3	-0.05013	1.000.000	1.000.000	1.000.000	1.000.000	1.000.000	1.000.000	1.000.000	-	1	-	1	-	1	-	1	1	-	1	0	0
100203673|F|0-5:A>T-5:A>T	100203673	35584	TGCAGTGAATGTGTAATTACTTTTGTGTTCAAAGCAGAACTTTCAGCGTAGGATCACACACAGACACAA	TGCAGWGAATGTGTAATTACTTTTGTGTTCAAAGCAGAACTTTCAGCGTAGGATCACAYRCAGACACAA	3	2	5:A>T	5	0.500000	0.750000	0.250000	0.750000	0.250000	0.000000	0.375000	0.375000	0.375000	958.333	933.333	102.679	-0.250000	-0.18985	3	-0.05013	1.000.000	1.000.000	1.000.000	1.000.000	1.000.000	1.000.000	1.000.000	-	0	-	0	-	0	-	0	0	-	0	1	1
100203674|F|0--58:T>C	100203674	35584	TGCAGAGAATGTGTAATTACTTTTGTGTTCAAAGCAGAACTTTCAGCGTAGGATCACATGCAGACACAA	TGCAGWGAATGTGTAATTACTTTTGTGTTCAAAGCAGAACTTTCAGCGTAGGATCACAYRCAGACACAA	3	1		58	0.500000	0.250000	0.750000	0.250000	0.750000	0.000000	0.375000	0.375000	0.375000	1.200.000	863.636	138.947	-0.250000	-0.23022	3	-0.03735	1.000.000	1.000.000	1.000.000	1.000.000	1.000.000	2.000.000	2.000.000	-	1	-	1	-	0	-	0	0	-	0	0	0
100203674|F|0-58:T>C-58:T>C	100203674	35584	TGCAGAGAATGTGTAATTACTTTTGTGTTCAAAGCAGAACTTTCAGCGTAGGATCACACGCAGACACAA	TGCAGWGAATGTGTAATTACTTTTGTGTTCAAAGCAGAACTTTCAGCGTAGGATCACAYRCAGACACAA	3	1	58:T>C	58	0.500000	0.250000	0.750000	0.250000	0.750000	0.000000	0.375000	0.375000	0.375000	1.200.000	863.636	138.947	-0.250000	-0.23022	3	-0.03735	1.000.000	1.000.000	1.000.000	1.000.000	1.000.000	2.000.000	2.000.000	-	0	-	0	-	1	-	1	1	-	1	1	1
100203857|F|0--13:T>C	100203857	35690	TGCAGGTTTCTAGTCACTTGCAGGTTCTTGCCCGGAGAAAGTCTCGTGAGATACAGTCAAAGCTGAAGG	TGCAGGTTTCTAGYCACTTGCAGGTTCTTGCCCGGAGAAARTCTCGYGAGATRCAGTCAAAGCTGAAGG	3	4		13	0.625000	0.400000	0.600000	0.400000	0.600000	0.000000	0.480000	0.480000	0.480000	812.500	663.636	122.432	-0.400000	-0.28473	3	-0.05809	1.000.000	1.000.000	1.000.000	1.000.000	1.000.000	4.000.000	4.000.000	1	0	1	0	1	0	1	0	0	-	0	-	-
100203857|F|0-13:T>C-13:T>C	100203857	35690	TGCAGGTTTCTAGCCACTTGCAGGTTCTTGCCCGGAGAAAATCTCGCGAGATGCAGTCAAAGCTGAAGG	TGCAGGTTTCTAGYCACTTGCAGGTTCTTGCCCGGAGAAARTCTCGYGAGATRCAGTCAAAGCTGAAGG	3	4	13:T>C	13	0.625000	0.400000	0.600000	0.400000	0.600000	0.000000	0.480000	0.480000	0.480000	812.500	663.636	122.432	-0.400000	-0.28473	3	-0.05809	1.000.000	1.000.000	1.000.000	1.000.000	1.000.000	4.000.000	4.000.000	0	1	0	1	0	1	0	1	1	-	1	-	-
100203882|F|0--28:C>A	100203882	35705	TGCAGTGTGTACAATTCGACAGTAAATACAGGCACCTCCACCAGCACTGGCTAGCAGTCCCATTCAAGC	TGCAGTGTGTACAATTBGACAGTAAATAMAGGCAYCTCCACCAGCACTGGCTAGCAGTCCCATTCAAGC	3	3		28	0.500000	0.750000	0.250000	0.750000	0.250000	0.000000	0.375000	0.375000	0.375000	233.333	225.000	103.704	-0.250000	-0.17920	3	-0.02715	1.000.000	1.000.000	1.000.000	1.000.000	1.000.000	2.000.000	2.000.000	-	1	-	1	0	1	0	1	1	-	1	-	-
100203882|F|0-28:C>A-28:C>A	100203882	35705	TGCAGTGTGTACAATTGGACAGTAAATAAAGGCATCTCCACCAGCACTGGCTAGCAGTCCCATTCAAGC	TGCAGTGTGTACAATTBGACAGTAAATAMAGGCAYCTCCACCAGCACTGGCTAGCAGTCCCATTCAAGC	3	3	28:C>A	28	0.500000	0.750000	0.250000	0.750000	0.250000	0.000000	0.375000	0.375000	0.375000	233.333	225.000	103.704	-0.250000	-0.17920	3	-0.02715	1.000.000	1.000.000	1.000.000	1.000.000	1.000.000	2.000.000	2.000.000	-	0	-	0	1	0	1	0	0	-	0	-	-
100206707|F|0--32:C>T	100206707	37115	TGCAGCATCTGCGGCAAGAAGTTCACGCAGCGCGGCACCATGACGCGCCACATGCGCAGCCACCTGGGC	TGCAGCATCTGCGGCAAGAAGTTCACGCAGCGYGGCACYATGACGCGCCACATGCGCAGCCACCTGGGC	3	1		32	0.562500	0.333333	0.666667	0.333333	0.666667	0.000000	0.444444	0.444444	0.444444	1.040.000	1.000.000	104.000	-0.333333	-0.24404	3	-0.06270	1.000.000	1.000.000	1.000.000	1.000.000	1.000.000	2.000.000	2.000.000	-	0	-	0	-	1	-	1	0	1	0	-	-
100206707|F|0-32:C>T-32:C>T	100206707	37115	TGCAGCATCTGCGGCAAGAAGTTCACGCAGCGTGGCACCATGACGCGCCACATGCGCAGCCACCTGGGC	TGCAGCATCTGCGGCAAGAAGTTCACGCAGCGYGGCACYATGACGCGCCACATGCGCAGCCACCTGGGC	3	1	32:C>T	32	0.562500	0.333333	0.666667	0.333333	0.666667	0.000000	0.444444	0.444444	0.444444	1.040.000	1.000.000	104.000	-0.333333	-0.24404	3	-0.06270	1.000.000	1.000.000	1.000.000	1.000.000	1.000.000	2.000.000	2.000.000	-	1	-	1	-	0	-	0	1	0	1	-	-
100206708|F|0--38:T>C	100206708	37115	TGCAGCATCTGCGGCAAGAAGTTCACGCAGCGTGGCACTATGACGCGCCACATGCGCAGCCACCTGGGC	TGCAGCATCTGCGGCAAGAAGTTCACGCAGCGYGGCACYATGACGCGCCACATGCGCAGCCACCTGGGC	3	1		38	0.562500	0.222222	0.777778	0.222222	0.777778	0.000000	0.345679	0.345679	0.345679	1.100.000	984.615	111.719	-0.222222	-0.25177	3	-0.04627	1.000.000	1.000.000	1.000.000	1.000.000	1.000.000	2.000.000	2.000.000	-	0	-	0	-	0	-	0	0	0	0	-	-
100206708|F|0-38:T>C-38:T>C	100206708	37115	TGCAGCATCTGCGGCAAGAAGTTCACGCAGCGTGGCACCATGACGCGCCACATGCGCAGCCACCTGGGC	TGCAGCATCTGCGGCAAGAAGTTCACGCAGCGYGGCACYATGACGCGCCACATGCGCAGCCACCTGGGC	3	1	38:T>C	38	0.562500	0.222222	0.777778	0.222222	0.777778	0.000000	0.345679	0.345679	0.345679	1.100.000	984.615	111.719	-0.222222	-0.25177	3	-0.04627	1.000.000	1.000.000	1.000.000	1.000.000	1.000.000	2.000.000	2.000.000	-	1	-	1	-	1	-	1	1	1	1	-	-
100209609|F|0--8:T>C	100209609	38557	TGCAGGTGTACCCTGAAGTTCATGTCCTCCACCGAATGGACCACGATGTTGATGAACTGCATGAGATCG	TGCAGGTGYACCCTGAAGTTCATGTCCTCCACYGAATGGACCACGATGTTGATGAACTGCATGAGATCG	3	1		8	0.437500	0.571429	0.428571	0.571429	0.428571	0.000000	0.489796	0.489796	0.489796	5.200.000	3.016.667	172.376	-0.428571	-0.21638	3	-0.03181	1.000.000	1.000.000	1.000.000	1.000.000	1.000.000	3.000.000	3.000.000	-	1	-	1	-	0	-	0	1	0	1	-	-
100209609|F|0-8:T>C-8:T>C	100209609	38557	TGCAGGTGCACCCTGAAGTTCATGTCCTCCACCGAATGGACCACGATGTTGATGAACTGCATGAGATCG	TGCAGGTGYACCCTGAAGTTCATGTCCTCCACYGAATGGACCACGATGTTGATGAACTGCATGAGATCG	3	1	8:T>C	8	0.437500	0.571429	0.428571	0.571429	0.428571	0.000000	0.489796	0.489796	0.489796	5.200.000	3.016.667	172.376	-0.428571	-0.21638	3	-0.03181	1.000.000	1.000.000	1.000.000	1.000.000	1.000.000	3.000.000	3.000.000	-	0	-	0	-	1	-	1	0	1	0	-	-
100209610|F|0--32:C>T	100209610	38557	TGCAGGTGCACCCTGAAGTTCATGTCCTCCACCGAATGGACCACGATGTTGATGAACTGCATGAGATCG	TGCAGGTGYACCCTGAAGTTCATGTCCTCCACYGAATGGACCACGATGTTGATGAACTGCATGAGATCG	3	1		32	0.437500	0.857143	0.142857	0.857143	0.142857	0.000000	0.244898	0.244898	0.244898	4.425.000	3.300.000	134.091	-0.142857	-0.13663	3	-0.07544	1.000.000	1.000.000	1.000.000	1.000.000	1.000.000	1.000.000	1.000.000	-	1	-	1	-	1	-	1	1	0	1	-	-
100209610|F|0-32:C>T-32:C>T	100209610	38557	TGCAGGTGCACCCTGAAGTTCATGTCCTCCACTGAATGGACCACGATGTTGATGAACTGCATGAGATCG	TGCAGGTGYACCCTGAAGTTCATGTCCTCCACYGAATGGACCACGATGTTGATGAACTGCATGAGATCG	3	1	32:C>T	32	0.437500	0.857143	0.142857	0.857143	0.142857	0.000000	0.244898	0.244898	0.244898	4.425.000	3.300.000	134.091	-0.142857	-0.13663	3	-0.07544	1.000.000	1.000.000	1.000.000	1.000.000	1.000.000	1.000.000	1.000.000	-	0	-	0	-	0	-	0	0	1	0	-	-
100210863|F|0--10:C>T	100210863	39188	TGCAGTGCTTCGACCTGGAGGGCGAGTCAGGCCTGGTGGTGCGCGCCATCGGGACGGCCTGCACGCTGG	TGCAGTGCTTYGACCTGGAGGGSGARTCRGGCCTGGTGGTGCGCGCCATCGGGACGGCCTGCACGCTGG	3	3		10	0.437500	0.142857	0.857143	0.142857	0.857143	0.000000	0.244898	0.244898	0.244898	1.400.000	850.000	164.706	-0.142857	-0.12462	3	-0.01971	1.000.000	1.000.000	1.000.000	1.000.000	1.000.000	0.000000	0.000000	-	0	-	0	-	0	-	0	0	1	0	-	-
100210863|F|0-10:C>T-10:C>T	100210863	39188	TGCAGTGCTTTGACCTGGAGGGGGAGTCGGGCCTGGTGGTGCGCGCCATCGGGACGGCCTGCACGCTGG	TGCAGTGCTTYGACCTGGAGGGSGARTCRGGCCTGGTGGTGCGCGCCATCGGGACGGCCTGCACGCTGG	3	3	10:C>T	10	0.437500	0.142857	0.857143	0.142857	0.857143	0.000000	0.244898	0.244898	0.244898	1.400.000	850.000	164.706	-0.142857	-0.12462	3	-0.01971	1.000.000	1.000.000	1.000.000	1.000.000	1.000.000	0.000000	0.000000	-	1	-	1	-	1	-	1	1	0	1	-	-
100210864|F|0--25:G>A	100210864	39188	TGCAGTGCTTTGACCTGGAGGGGGAGTCGGGCCTGGTGGTGCGCGCCATCGGGACGGCCTGCACGCTGG	TGCAGTGCTTYGACCTGGAGGGSGARTCRGGCCTGGTGGTGCGCGCCATCGGGACGGCCTGCACGCTGG	3	1		25	0.437500	0.714286	0.285714	0.714286	0.285714	0.000000	0.408163	0.408163	0.408163	988.889	675.000	146.502	-0.285714	-0.17228	3	-0.01180	1.000.000	1.000.000	1.000.000	1.000.000	1.000.000	2.000.000	2.000.000	-	1	-	1	-	0	-	0	1	1	1	-	-
100210864|F|0-25:G>A-25:G>A	100210864	39188	TGCAGTGCTTTGACCTGGAGGGGGAATCGGGCCTGGTGGTGCGCGCCATCGGGACGGCCTGCACGCTGG	TGCAGTGCTTYGACCTGGAGGGSGARTCRGGCCTGGTGGTGCGCGCCATCGGGACGGCCTGCACGCTGG	3	1	25:G>A	25	0.437500	0.714286	0.285714	0.714286	0.285714	0.000000	0.408163	0.408163	0.408163	988.889	675.000	146.502	-0.285714	-0.17228	3	-0.01180	1.000.000	1.000.000	1.000.000	1.000.000	1.000.000	2.000.000	2.000.000	-	0	-	0	-	1	-	1	0	0	0	-	-
100211052|F|0--7:C>T	100211052	39282	TGCAGTGCGAGCACCACCCAGCCTGGTACAGTGACACCCTCAAGCAGAAGACCAGCTGGACCTGCCTAC	TGCAGTGYGAGCACCACCCAGCCTGGTAYAGYGACACMCTCAAGCAGAAGACCAGCTGGACCTGCCTRC	3	5		7	0.500000	0.250000	0.750000	0.250000	0.750000	0.000000	0.375000	0.375000	0.375000	2.600.000	1.470.000	176.871	-0.250000	-0.23595	3	-0.03455	1.000.000	1.000.000	1.000.000	1.000.000	1.000.000	2.000.000	2.000.000	-	0	-	0	-	0	-	0	0	-	0	-	-
100211052|F|0-7:C>T-7:C>T	100211052	39282	TGCAGTGTGAGCACCACCCAGCCTGGTATAGCGACACACTCAAGCAGAAGACCAGCTGGACCTGCCTGC	TGCAGTGYGAGCACCACCCAGCCTGGTAYAGYGACACMCTCAAGCAGAAGACCAGCTGGACCTGCCTRC	3	5	7:C>T	7	0.500000	0.250000	0.750000	0.250000	0.750000	0.000000	0.375000	0.375000	0.375000	2.600.000	1.470.000	176.871	-0.250000	-0.23595	3	-0.03455	1.000.000	1.000.000	1.000.000	1.000.000	1.000.000	2.000.000	2.000.000	-	1	-	1	-	1	-	1	1	-	1	-	-
100211291|F|0--39:G>A	100211291	39399	TGCAGTTCAGCACACCCATTACTGGTCTCTGCGATGGGCGATTCATAAAAAAGAGAACAAACATTAGGA	TGCAGTTCAGCACACCCATTACTGGTCTCTGCGATGGGCRATTCATAAAAAARAGAASAAACATTAGGA	3	2		39	0.437500	0.714286	0.285714	0.714286	0.285714	0.000000	0.408163	0.408163	0.408163	400.000	300.000	133.333	-0.285714	-0.15107	3	-0.04964	1.000.000	1.000.000	1.000.000	1.000.000	1.000.000	2.000.000	2.000.000	1	1	-	1	-	0	-	0	1	-	1	-	-
100211291|F|0-39:G>A-39:G>A	100211291	39399	TGCAGTTCAGCACACCCATTACTGGTCTCTGCGATGGGCAATTCATAAAAAAAAGAACAAACATTAGGA	TGCAGTTCAGCACACCCATTACTGGTCTCTGCGATGGGCRATTCATAAAAAARAGAASAAACATTAGGA	3	2	39:G>A	39	0.437500	0.714286	0.285714	0.714286	0.285714	0.000000	0.408163	0.408163	0.408163	400.000	300.000	133.333	-0.285714	-0.15107	3	-0.04964	1.000.000	1.000.000	1.000.000	1.000.000	1.000.000	2.000.000	2.000.000	0	0	-	0	-	1	-	1	0	-	0	-	-
100212709|F|0--13:C>G	100212709	40148	TGCAGCCAGAAAACTGCTGGTTAAAGCCAAGCATGAGATCGGAAGAGCGGTTCAGCAGGAATGCCGAGA	TGCAGCCAGAAAASTGCTGRTTAAAGCCAAGCATGAGATCGGAAGAGCGGTTCAGCAGGAATGCCGAGA	3	1		13	0.437500	0.571429	0.428571	0.571429	0.428571	0.000000	0.489796	0.489796	0.489796	4.800.000	2.140.000	224.299	-0.428571	-0.16790	3	-0.05653	1.000.000	1.000.000	1.000.000	1.000.000	1.000.000	2.000.000	2.000.000	-	1	-	1	-	0	-	0	1	-	1	-	-
100212709|F|0-13:C>G-13:C>G	100212709	40148	TGCAGCCAGAAAAGTGCTGGTTAAAGCCAAGCATGAGATCGGAAGAGCGGTTCAGCAGGAATGCCGAGA	TGCAGCCAGAAAASTGCTGRTTAAAGCCAAGCATGAGATCGGAAGAGCGGTTCAGCAGGAATGCCGAGA	3	1	13:C>G	13	0.437500	0.571429	0.428571	0.571429	0.428571	0.000000	0.489796	0.489796	0.489796	4.800.000	2.140.000	224.299	-0.428571	-0.16790	3	-0.05653	1.000.000	1.000.000	1.000.000	1.000.000	1.000.000	2.000.000	2.000.000	-	0	-	0	-	1	-	1	0	-	0	-	-
100212710|F|0--19:A>G	100212710	40148	TGCAGCCAGAAAACTGCTGATTAAAGCCAAGCATGAGATCGGAAGAGCGGTTCAGCAGGAATGCCGAGA	TGCAGCCAGAAAASTGCTGRTTAAAGCCAAGCATGAGATCGGAAGAGCGGTTCAGCAGGAATGCCGAGA	3	1		19	0.437500	0.285714	0.714286	0.285714	0.714286	0.000000	0.408163	0.408163	0.408163	5.325.000	3.088.889	172.392	-0.285714	-0.19319	3	-0.04773	1.000.000	1.000.000	1.000.000	1.000.000	1.000.000	2.000.000	2.000.000	-	0	-	0	-	0	-	0	1	-	1	-	-
100212710|F|0-19:A>G-19:A>G	100212710	40148	TGCAGCCAGAAAACTGCTGGTTAAAGCCAAGCATGAGATCGGAAGAGCGGTTCAGCAGGAATGCCGAGA	TGCAGCCAGAAAASTGCTGRTTAAAGCCAAGCATGAGATCGGAAGAGCGGTTCAGCAGGAATGCCGAGA	3	1	19:A>G	19	0.437500	0.285714	0.714286	0.285714	0.714286	0.000000	0.408163	0.408163	0.408163	5.325.000	3.088.889	172.392	-0.285714	-0.19319	3	-0.04773	1.000.000	1.000.000	1.000.000	1.000.000	1.000.000	2.000.000	2.000.000	-	1	-	1	-	1	-	1	0	-	0	-	-
100212757|F|0--5:G>A	100212757	40174	TGCAGGACTGCACTGTCTGCATGAGATCGGAAGAGCGGTTCAGCAGGAATGCCGAGACCGATCTCGTAT	TGCAGRACWRCACTGBMTGCATGAGATCGGAAGAGCGGTTCAGCAGGAATGCCGAGACCGATCTCGTAT	3	3		5	0.500000	0.750000	0.250000	0.750000	0.250000	0.000000	0.375000	0.375000	0.375000	6.166.667	4.475.000	137.803	-0.250000	-0.18322	3	-0.03529	1.000.000	1.000.000	1.000.000	1.000.000	1.000.000	1.000.000	1.000.000	-	1	-	1	-	-	-	-	1	-	1	0	0
100212757|F|0-5:G>A-5:G>A	100212757	40174	TGCAGAACAGCACTGCCTGCATGAGATCGGAAGAGCGGTTCAGCAGGAATGCCGAGACCGATCTCGTAT	TGCAGRACWRCACTGBMTGCATGAGATCGGAAGAGCGGTTCAGCAGGAATGCCGAGACCGATCTCGTAT	3	3	5:G>A	5	0.500000	0.750000	0.250000	0.750000	0.250000	0.000000	0.375000	0.375000	0.375000	6.166.667	4.475.000	137.803	-0.250000	-0.18322	3	-0.03529	1.000.000	1.000.000	1.000.000	1.000.000	1.000.000	1.000.000	1.000.000	-	0	-	0	-	-	-	-	0	-	0	1	1
100212758|F|0--9:A>G	100212758	40174	TGCAGGACTACACTGGATGCATGAGATCGGAAGAGCGGTTCAGCAGGAATGCCGAGACCGATCTCGTAT	TGCAGRACWRCACTGBMTGCATGAGATCGGAAGAGCGGTTCAGCAGGAATGCCGAGACCGATCTCGTAT	3	3		9	0.500000	0.250000	0.750000	0.250000	0.750000	0.000000	0.375000	0.375000	0.375000	8.075.000	4.966.667	162.584	-0.250000	-0.21976	3	-0.03172	1.000.000	1.000.000	1.000.000	1.000.000	1.000.000	2.000.000	2.000.000	-	0	-	0	-	-	-	-	0	-	0	0	0
100212758|F|0-9:A>G-9:A>G	100212758	40174	TGCAGGACTGCACTGTCTGCATGAGATCGGAAGAGCGGTTCAGCAGGAATGCCGAGACCGATCTCGTAT	TGCAGRACWRCACTGBMTGCATGAGATCGGAAGAGCGGTTCAGCAGGAATGCCGAGACCGATCTCGTAT	3	3	9:A>G	9	0.500000	0.250000	0.750000	0.250000	0.750000	0.000000	0.375000	0.375000	0.375000	8.075.000	4.966.667	162.584	-0.250000	-0.21976	3	-0.03172	1.000.000	1.000.000	1.000.000	1.000.000	1.000.000	2.000.000	2.000.000	-	1	-	1	-	-	-	-	1	-	1	1	1
100212761|F|0--5:G>A	100212761	40176	TGCAGGACCTTCTGTTTCCCAGCATGAGATCGGAAGAGCGGTTCAGCAGGAATGCCGAGACCGATCTCG	TGCAGRMCCTYCTGTTTCCCAGCATGAGATCGGAAGAGCGGTTCAGCAGGAATGCCGAGACCGATCTCG	3	2		5	0.562500	0.666667	0.333333	0.666667	0.333333	0.000000	0.444444	0.444444	0.444444	5.266.667	3.540.000	148.776	-0.333333	-0.21630	3	0.00022	1.000.000	1.000.000	1.000.000	1.000.000	1.000.000	2.000.000	2.000.000	-	1	-	1	-	1	-	1	1	0	1	0	0
100212761|F|0-5:G>A-5:G>A	100212761	40176	TGCAGAACCTCCTGTTTCCCAGCATGAGATCGGAAGAGCGGTTCAGCAGGAATGCCGAGACCGATCTCG	TGCAGRMCCTYCTGTTTCCCAGCATGAGATCGGAAGAGCGGTTCAGCAGGAATGCCGAGACCGATCTCG	3	2	5:G>A	5	0.562500	0.666667	0.333333	0.666667	0.333333	0.000000	0.444444	0.444444	0.444444	5.266.667	3.540.000	148.776	-0.333333	-0.21630	3	0.00022	1.000.000	1.000.000	1.000.000	1.000.000	1.000.000	2.000.000	2.000.000	-	0	-	0	-	0	-	0	0	1	0	1	1
100212763|F|0--12:T>G	100212763	40177	TGCAGAACTCATTTGCATGTCCTTGACCAAAAAACAACAACACTTGCATGAGATCGGAAGAGCGGTTCA	TGCAGAACTCATKTGYRTSTYCTTGACCAAAAAACAACAACACTTGCATGAGATCGGAAGAGCGGTTCA	3	5		12	0.562500	0.666667	0.333333	0.666667	0.333333	0.000000	0.444444	0.444444	0.444444	3.416.667	2.540.000	134.514	-0.333333	-0.21715	3	-0.07589	1.000.000	1.000.000	1.000.000	1.000.000	1.000.000	2.000.000	2.000.000	-	1	-	1	-	1	-	1	1	0	1	0	0
100212763|F|0-12:T>G-12:T>G	100212763	40177	TGCAGAACTCATGTGTGTCTTCTTGACCAAAAAACAACAACACTTGCATGAGATCGGAAGAGCGGTTCA	TGCAGAACTCATKTGYRTSTYCTTGACCAAAAAACAACAACACTTGCATGAGATCGGAAGAGCGGTTCA	3	5	12:T>G	12	0.562500	0.666667	0.333333	0.666667	0.333333	0.000000	0.444444	0.444444	0.444444	3.416.667	2.540.000	134.514	-0.333333	-0.21715	3	-0.07589	1.000.000	1.000.000	1.000.000	1.000.000	1.000.000	2.000.000	2.000.000	-	0	-	0	-	0	-	0	0	1	0	1	1
100212773|F|0--26:C>T	100212773	40181	TGCAGAAGTAACATCTGTGCCTCCCTCGGTTTGCATAAAAGATGGTGGCATGAGATCGGAAGAGCGGTT	TGCAGAAGTAACATCTGTGCCTCCCTYRSTTTGCATAAAAGATGGTGGCATGAGATCGGAAGAGCGGTT	3	1		26	0.437500	0.571429	0.428571	0.571429	0.428571	0.000000	0.489796	0.489796	0.489796	4.328.571	3.316.667	130.510	-0.428571	-0.20398	3	-0.08976	1.000.000	1.000.000	1.000.000	1.000.000	1.000.000	3.000.000	3.000.000	0	-	0	-	-	-	-	-	-	0	-	1	1
100212773|F|0-26:C>T-26:C>T	100212773	40181	TGCAGAAGTAACATCTGTGCCTCCCTTGGTTTGCATAAAAGATGGTGGCATGAGATCGGAAGAGCGGTT	TGCAGAAGTAACATCTGTGCCTCCCTYRSTTTGCATAAAAGATGGTGGCATGAGATCGGAAGAGCGGTT	3	1	26:C>T	26	0.437500	0.571429	0.428571	0.571429	0.428571	0.000000	0.489796	0.489796	0.489796	4.328.571	3.316.667	130.510	-0.428571	-0.20398	3	-0.08976	1.000.000	1.000.000	1.000.000	1.000.000	1.000.000	3.000.000	3.000.000	1	-	1	-	-	-	-	-	-	1	-	0	0
100212802|F|0--9:T>C	100212802	40196	TGCAGACCCTCCCTAAGCCAGGCATGAGATCGGAAGAGCGGTTCAGCAGGAATGCCGAGACCGATCTCG	TGCAGACMCYCCCTAMGCCAGGCATGAGATCGGAAGAGCGGTTCAGCAGGAATGCCGAGACCGATCTCG	3	2		9	0.500000	0.750000	0.250000	0.750000	0.250000	0.000000	0.375000	0.375000	0.375000	6.363.636	3.900.000	163.170	-0.250000	-0.19686	3	-0.00001	1.000.000	1.000.000	1.000.000	1.000.000	1.000.000	2.000.000	2.000.000	-	1	-	1	-	0	-	0	1	-	1	1	1
100212802|F|0-9:T>C-9:T>C	100212802	40196	TGCAGACCCCCCCTACGCCAGGCATGAGATCGGAAGAGCGGTTCAGCAGGAATGCCGAGACCGATCTCG	TGCAGACMCYCCCTAMGCCAGGCATGAGATCGGAAGAGCGGTTCAGCAGGAATGCCGAGACCGATCTCG	3	2	9:T>C	9	0.500000	0.750000	0.250000	0.750000	0.250000	0.000000	0.375000	0.375000	0.375000	6.363.636	3.900.000	163.170	-0.250000	-0.19686	3	-0.00001	1.000.000	1.000.000	1.000.000	1.000.000	1.000.000	2.000.000	2.000.000	-	0	-	0	-	1	-	1	0	-	0	0	0
100212804|F|0--7:A>G	100212804	40197	TGCAGACAGCGCATACCAGCATGAGATCGGAAGAGCGGTTCAGCAGGAATGCCGAGACCGATCTCGTAT	TGCAGACRGCRCAYACCAGCATGAGATCGGAAGAGCGGTTCAGCAGGAATGCCGAGACCGATCTCGTAT	3	1		7	0.500000	0.500000	0.500000	0.500000	0.500000	0.000000	0.500000	0.500000	0.500000	9.737.500	6.150.000	158.333	-0.500000	-0.23104	3	-0.06701	1.000.000	1.000.000	1.000.000	1.000.000	1.000.000	4.000.000	3.000.000	-	1	-	1	-	0	-	0	1	-	1	0	0
100212804|F|0-7:A>G-7:A>G	100212804	40197	TGCAGACGGCGCATACCAGCATGAGATCGGAAGAGCGGTTCAGCAGGAATGCCGAGACCGATCTCGTAT	TGCAGACRGCRCAYACCAGCATGAGATCGGAAGAGCGGTTCAGCAGGAATGCCGAGACCGATCTCGTAT	3	1	7:A>G	7	0.500000	0.500000	0.500000	0.500000	0.500000	0.000000	0.500000	0.500000	0.500000	9.737.500	6.150.000	158.333	-0.500000	-0.23104	3	-0.06701	1.000.000	1.000.000	1.000.000	1.000.000	1.000.000	4.000.000	3.000.000	-	0	-	0	-	1	-	1	0	-	0	1	1
100212806|F|0--7:A>G	100212806	40198	TGCAGACAGGCGAGCTGAGCCCACGCATGAGATCGGAAGAGCGGTTCAGCAGGAATGCCGAGACCGATC	TGCAGACRGGCGAGCTSAGCCCVCGCATGAGATCGGAAGAGCGGTTCAGCAGGAATGCCGAGACCGATC	3	3		7	0.562500	0.666667	0.333333	0.666667	0.333333	0.000000	0.444444	0.444444	0.444444	4.733.333	2.350.000	201.418	-0.333333	-0.21847	3	-0.07909	1.000.000	1.000.000	1.000.000	1.000.000	1.000.000	1.000.000	1.000.000	-	1	-	1	-	1	-	1	1	0	1	0	0
100212806|F|0-7:A>G-7:A>G	100212806	40198	TGCAGACGGGCGAGCTCAGCCCCCGCATGAGATCGGAAGAGCGGTTCAGCAGGAATGCCGAGACCGATC	TGCAGACRGGCGAGCTSAGCCCVCGCATGAGATCGGAAGAGCGGTTCAGCAGGAATGCCGAGACCGATC	3	3	7:A>G	7	0.562500	0.666667	0.333333	0.666667	0.333333	0.000000	0.444444	0.444444	0.444444	4.733.333	2.350.000	201.418	-0.333333	-0.21847	3	-0.07909	1.000.000	1.000.000	1.000.000	1.000.000	1.000.000	1.000.000	1.000.000	-	0	-	0	-	0	-	0	0	1	0	1	1
100212810|F|0--10:T>C	100212810	40200	TGCAGAGACTTGCTGCTCGTCTGGGCGTTGTCACTGGCATGAGATCGGAAGAGCGGTTCAGCAGGAATG	TGCAGAGACTYGCTGCWCGTCTGGGYGTTGTCACTGGCATGAGATCGGAAGAGCGGTTCAGCAGGAATG	3	2		10	0.562500	0.888889	0.111111	0.888889	0.111111	0.000000	0.197531	0.197531	0.197531	3.920.000	2.200.000	178.182	-0.111111	-0.16844	3	-0.01889	1.000.000	1.000.000	1.000.000	1.000.000	1.000.000	1.000.000	1.000.000	-	1	-	1	-	1	-	1	1	0	1	1	1
100212810|F|0-10:T>C-10:T>C	100212810	40200	TGCAGAGACTCGCTGCACGTCTGGGCGTTGTCACTGGCATGAGATCGGAAGAGCGGTTCAGCAGGAATG	TGCAGAGACTYGCTGCWCGTCTGGGYGTTGTCACTGGCATGAGATCGGAAGAGCGGTTCAGCAGGAATG	3	2	10:T>C	10	0.562500	0.888889	0.111111	0.888889	0.111111	0.000000	0.197531	0.197531	0.197531	3.920.000	2.200.000	178.182	-0.111111	-0.16844	3	-0.01889	1.000.000	1.000.000	1.000.000	1.000.000	1.000.000	1.000.000	1.000.000	-	0	-	0	-	0	-	0	0	1	0	0	0
100212810|F|0--25:C>T	100212810	40200	TGCAGAGACTTGCTGCTCGTCTGGGCGTTGTCACTGGCATGAGATCGGAAGAGCGGTTCAGCAGGAATG	TGCAGAGACTYGCTGCWCGTCTGGGYGTTGTCACTGGCATGAGATCGGAAGAGCGGTTCAGCAGGAATG	3	2		25	0.562500	0.777778	0.222222	0.777778	0.222222	0.000000	0.345679	0.345679	0.345679	4.085.714	2.000.000	204.286	-0.222222	-0.20226	3	-0.01628	1.000.000	1.000.000	1.000.000	1.000.000	1.000.000	1.000.000	1.000.000	-	1	-	1	-	1	-	1	1	1	1	0	0
100212810|F|0-25:C>T-25:C>T	100212810	40200	TGCAGAGACTTGCTGCACGTCTGGGTGTTGTCACTGGCATGAGATCGGAAGAGCGGTTCAGCAGGAATG	TGCAGAGACTYGCTGCWCGTCTGGGYGTTGTCACTGGCATGAGATCGGAAGAGCGGTTCAGCAGGAATG	3	2	25:C>T	25	0.562500	0.777778	0.222222	0.777778	0.222222	0.000000	0.345679	0.345679	0.345679	4.085.714	2.000.000	204.286	-0.222222	-0.20226	3	-0.01628	1.000.000	1.000.000	1.000.000	1.000.000	1.000.000	1.000.000	1.000.000	-	0	-	0	-	0	-	0	0	0	0	1	1
100212816|F|0--6:A>G	100212816	40202	TGCAGAACAAGACCAGCTTCTCCGGGGCTGACCTGCGCATGAGATCGGAAGAGCGGTTCAGCAGGAATG	TGCAGARCAAGACCAGCTTCTCYGGGGCTGACCTGCGCATGAGATCGGAAGAGCGGTTCAGCAGGAATG	3	2		6	0.500000	0.750000	0.250000	0.750000	0.250000	0.000000	0.375000	0.375000	0.375000	4.633.333	3.000.000	154.444	-0.250000	-0.18212	3	-0.03183	1.000.000	1.000.000	1.000.000	1.000.000	1.000.000	0.000000	0.000000	-	1	-	1	-	1	-	1	1	-	1	0	0
100212816|F|0-6:A>G-6:A>G	100212816	40202	TGCAGAGCAAGACCAGCTTCTCTGGGGCTGACCTGCGCATGAGATCGGAAGAGCGGTTCAGCAGGAATG	TGCAGARCAAGACCAGCTTCTCYGGGGCTGACCTGCGCATGAGATCGGAAGAGCGGTTCAGCAGGAATG	3	2	6:A>G	6	0.500000	0.750000	0.250000	0.750000	0.250000	0.000000	0.375000	0.375000	0.375000	4.633.333	3.000.000	154.444	-0.250000	-0.18212	3	-0.03183	1.000.000	1.000.000	1.000.000	1.000.000	1.000.000	0.000000	0.000000	-	0	-	0	-	0	-	0	0	-	0	1	1
100212816|F|0--22:C>T	100212816	40202	TGCAGAACAAGACCAGCTTCTCCGGGGCTGACCTGCGCATGAGATCGGAAGAGCGGTTCAGCAGGAATG	TGCAGARCAAGACCAGCTTCTCYGGGGCTGACCTGCGCATGAGATCGGAAGAGCGGTTCAGCAGGAATG	3	1		22	0.500000	0.500000	0.500000	0.500000	0.500000	0.000000	0.500000	0.500000	0.500000	5.287.500	3.185.714	165.975	-0.500000	-0.23463	3	-0.06518	1.000.000	1.000.000	1.000.000	1.000.000	1.000.000	2.000.000	2.000.000	-	1	-	1	-	0	-	0	1	-	1	0	0
100212816|F|0-22:C>T-22:C>T	100212816	40202	TGCAGAACAAGACCAGCTTCTCTGGGGCTGACCTGCGCATGAGATCGGAAGAGCGGTTCAGCAGGAATG	TGCAGARCAAGACCAGCTTCTCYGGGGCTGACCTGCGCATGAGATCGGAAGAGCGGTTCAGCAGGAATG	3	1	22:C>T	22	0.500000	0.500000	0.500000	0.500000	0.500000	0.000000	0.500000	0.500000	0.500000	5.287.500	3.185.714	165.975	-0.500000	-0.23463	3	-0.06518	1.000.000	1.000.000	1.000.000	1.000.000	1.000.000	2.000.000	2.000.000	-	0	-	0	-	1	-	1	0	-	0	1	1
100212833|F|0--16:C>T	100212833	40210	TGCAGAGTAAAACAGCCCTCCCCACTGGCATGAGATCGGAAGAGCGGTTCAGCAGGAATGCCGAGACCG	TGCAGAGTAAAACAGCYCTSCCCACTGGCATGAGATCGGAAGAGCGGTTCAGCAGGAATGCCGAGACCG	3	1		16	0.562500	0.444444	0.555556	0.444444	0.555556	0.000000	0.493827	0.493827	0.493827	4.625.000	4.037.500	114.551	-0.444444	-0.26359	3	-0.02104	1.000.000	1.000.000	1.000.000	1.000.000	1.000.000	4.000.000	3.000.000	-	1	-	1	-	1	-	1	-	0	-	0	0
100212833|F|0-16:C>T-16:C>T	100212833	40210	TGCAGAGTAAAACAGCTCTCCCCACTGGCATGAGATCGGAAGAGCGGTTCAGCAGGAATGCCGAGACCG	TGCAGAGTAAAACAGCYCTSCCCACTGGCATGAGATCGGAAGAGCGGTTCAGCAGGAATGCCGAGACCG	3	1	16:C>T	16	0.562500	0.444444	0.555556	0.444444	0.555556	0.000000	0.493827	0.493827	0.493827	4.625.000	4.037.500	114.551	-0.444444	-0.26359	3	-0.02104	1.000.000	1.000.000	1.000.000	1.000.000	1.000.000	4.000.000	3.000.000	-	0	-	0	-	0	-	0	-	1	-	1	1
100212835|F|0--18:C>A	100212835	40211	TGCAGAGTTCCTCCTCTTCATCAGAGGGGACGCATGAGATCGGAAGAGCGGTTCAGCAGGAATGCCGAG	TGCAGAGTTCCTCCTCTTMAYCAGAGGGGASGCATGAGATCGGAAGAGCGGTTCAGCAGGAATGCCGAG	3	3		18	0.500000	0.750000	0.250000	0.750000	0.250000	0.000000	0.375000	0.375000	0.375000	5.475.000	5.066.667	108.059	-0.250000	-0.17799	2	0.00000	1.000.000	1.000.000	1.000.000	1.000.000	1.000.000	1.000.000	1.000.000	-	1	-	1	-	1	-	1	1	-	1	0	0
100212835|F|0-18:C>A-18:C>A	100212835	40211	TGCAGAGTTCCTCCTCTTAACCAGAGGGGAGGCATGAGATCGGAAGAGCGGTTCAGCAGGAATGCCGAG	TGCAGAGTTCCTCCTCTTMAYCAGAGGGGASGCATGAGATCGGAAGAGCGGTTCAGCAGGAATGCCGAG	3	3	18:C>A	18	0.500000	0.750000	0.250000	0.750000	0.250000	0.000000	0.375000	0.375000	0.375000	5.475.000	5.066.667	108.059	-0.250000	-0.17799	2	0.00000	1.000.000	1.000.000	1.000.000	1.000.000	1.000.000	1.000.000	1.000.000	-	0	-	0	-	0	-	0	0	-	0	1	1
100212844|F|0--6:G>T	100212844	40216	TGCAGAGCGGTAAGCGAGCATGAGATCGGAAGAGCGGTTCAGCAGGAATGCCGAGACCGATCTCGTATG	TGCAGMKCRGTAASCGAGCATGAGATCGGAAGAGCGGTTCAGCAGGAATGCCGAGACCGATCTCGTATG	3	3		6	0.500000	0.750000	0.250000	0.750000	0.250000	0.000000	0.375000	0.375000	0.375000	6.208.333	1.800.000	344.907	-0.250000	-0.19427	3	0.00021	1.000.000	1.000.000	1.000.000	1.000.000	1.000.000	1.000.000	1.000.000	-	1	-	1	-	1	-	1	1	-	1	0	0
100212844|F|0-6:G>T-6:G>T	100212844	40216	TGCAGATCAGTAACCGAGCATGAGATCGGAAGAGCGGTTCAGCAGGAATGCCGAGACCGATCTCGTATG	TGCAGMKCRGTAASCGAGCATGAGATCGGAAGAGCGGTTCAGCAGGAATGCCGAGACCGATCTCGTATG	3	3	6:G>T	6	0.500000	0.750000	0.250000	0.750000	0.250000	0.000000	0.375000	0.375000	0.375000	6.208.333	1.800.000	344.907	-0.250000	-0.19427	3	0.00021	1.000.000	1.000.000	1.000.000	1.000.000	1.000.000	1.000.000	1.000.000	-	0	-	0	-	0	-	0	0	-	0	1	1
100212846|F|0--9:A>T	100212846	40217	TGCAGATCCAACAAAGATGGGAGGCCTGAGCATGAGATCGGAAGAGCGGTTCAGCAGGAATGCCGAGAC	TGCAGMTCCWACAAAGATGGGAGGCCTGAGCATGAGATCGGAAGAGCGGTTCAGCAGGAATGCCGAGAC	3	1		9	0.500000	0.250000	0.750000	0.250000	0.750000	0.000000	0.375000	0.375000	0.375000	9.425.000	7.258.333	129.851	-0.250000	-0.23319	3	0.00002	1.000.000	1.000.000	1.000.000	1.000.000	1.000.000	2.000.000	2.000.000	-	0	-	0	-	0	-	0	1	-	1	0	0
100212846|F|0-9:A>T-9:A>T	100212846	40217	TGCAGATCCTACAAAGATGGGAGGCCTGAGCATGAGATCGGAAGAGCGGTTCAGCAGGAATGCCGAGAC	TGCAGMTCCWACAAAGATGGGAGGCCTGAGCATGAGATCGGAAGAGCGGTTCAGCAGGAATGCCGAGAC	3	1	9:A>T	9	0.500000	0.250000	0.750000	0.250000	0.750000	0.000000	0.375000	0.375000	0.375000	9.425.000	7.258.333	129.851	-0.250000	-0.23319	3	0.00002	1.000.000	1.000.000	1.000.000	1.000.000	1.000.000	2.000.000	2.000.000	-	1	-	1	-	1	-	1	0	-	0	1	1
100212848|F|0--7:T>C	100212848	40218	TGCAGATTCTCAACGACCTCCTGACTGCCACACGCCACTACCAGGGCATGAGATCGGAAGAGCGGTTCA	TGCAGATYCTCAACGACCTCCTGACKGCCACACGSCACTACCARGGCATGAGATCGGAAGAGCGGTTCA	3	3		7	0.500000	0.750000	0.250000	0.750000	0.250000	0.000000	0.375000	0.375000	0.375000	2.863.636	1.150.000	249.012	-0.250000	-0.14994	3	-0.02608	1.000.000	1.000.000	1.000.000	1.000.000	1.000.000	0.000000	0.000000	-	1	-	1	-	1	-	1	1	-	1	0	0
100212848|F|0-7:T>C-7:T>C	100212848	40218	TGCAGATCCTCAACGACCTCCTGACGGCCACACGGCACTACCAGGGCATGAGATCGGAAGAGCGGTTCA	TGCAGATYCTCAACGACCTCCTGACKGCCACACGSCACTACCARGGCATGAGATCGGAAGAGCGGTTCA	3	3	7:T>C	7	0.500000	0.750000	0.250000	0.750000	0.250000	0.000000	0.375000	0.375000	0.375000	2.863.636	1.150.000	249.012	-0.250000	-0.14994	3	-0.02608	1.000.000	1.000.000	1.000.000	1.000.000	1.000.000	0.000000	0.000000	-	0	-	0	-	0	-	0	0	-	0	1	1
100212849|F|0--43:A>G	100212849	40218	TGCAGATTCTCAACGACCTCCTGACTGCCACACGCCACTACCAAGGCATGAGATCGGAAGAGCGGTTCA	TGCAGATYCTCAACGACCTCCTGACKGCCACACGSCACTACCARGGCATGAGATCGGAAGAGCGGTTCA	3	1		43	0.500000	0.250000	0.750000	0.250000	0.750000	0.000000	0.375000	0.375000	0.375000	4.825.000	1.611.111	299.483	-0.250000	-0.21614	3	-0.03012	1.000.000	1.000.000	1.000.000	1.000.000	1.000.000	2.000.000	2.000.000	-	0	-	0	-	0	-	0	1	-	1	0	0
100212849|F|0-43:A>G-43:A>G	100212849	40218	TGCAGATTCTCAACGACCTCCTGACTGCCACACGCCACTACCAGGGCATGAGATCGGAAGAGCGGTTCA	TGCAGATYCTCAACGACCTCCTGACKGCCACACGSCACTACCARGGCATGAGATCGGAAGAGCGGTTCA	3	1	43:A>G	43	0.500000	0.250000	0.750000	0.250000	0.750000	0.000000	0.375000	0.375000	0.375000	4.825.000	1.611.111	299.483	-0.250000	-0.21614	3	-0.03012	1.000.000	1.000.000	1.000.000	1.000.000	1.000.000	2.000.000	2.000.000	-	1	-	1	-	1	-	1	0	-	0	1	1
100212851|F|0--5:G>A	100212851	40219	TGCAGGTCGGCACAGTGGGCCTTAAGCCGGCATGAGATCGGAAGAGCGGTTCAGCAGGAATGCCGAGAC	TGCAGRTCGGCRCWGTGGGCCTTAAGSCGGCATGAGATCGGAAGAGCGGTTCAGCAGGAATGCCGAGAC	3	3		5	0.500000	0.750000	0.250000	0.750000	0.250000	0.000000	0.375000	0.375000	0.375000	5.850.000	2.875.000	203.478	-0.250000	-0.17780	3	-0.04763	1.000.000	1.000.000	1.000.000	1.000.000	1.000.000	1.000.000	1.000.000	-	1	-	1	-	1	-	1	1	-	1	0	0
100212851|F|0-5:G>A-5:G>A	100212851	40219	TGCAGATCGGCACTGTGGGCCTTAAGGCGGCATGAGATCGGAAGAGCGGTTCAGCAGGAATGCCGAGAC	TGCAGRTCGGCRCWGTGGGCCTTAAGSCGGCATGAGATCGGAAGAGCGGTTCAGCAGGAATGCCGAGAC	3	3	5:G>A	5	0.500000	0.750000	0.250000	0.750000	0.250000	0.000000	0.375000	0.375000	0.375000	5.850.000	2.875.000	203.478	-0.250000	-0.17780	3	-0.04763	1.000.000	1.000.000	1.000.000	1.000.000	1.000.000	1.000.000	1.000.000	-	0	-	0	-	0	-	0	0	-	0	1	1
100212852|F|0--11:G>A	100212852	40219	TGCAGGTCGGCGCAGTGGGCCTTAAGCCGGCATGAGATCGGAAGAGCGGTTCAGCAGGAATGCCGAGAC	TGCAGRTCGGCRCWGTGGGCCTTAAGSCGGCATGAGATCGGAAGAGCGGTTCAGCAGGAATGCCGAGAC	3	1		11	0.500000	0.250000	0.750000	0.250000	0.750000	0.000000	0.375000	0.375000	0.375000	7.300.000	4.375.000	166.857	-0.250000	-0.22519	3	-0.03539	1.000.000	1.000.000	1.000.000	1.000.000	1.000.000	2.000.000	2.000.000	-	0	-	0	-	0	-	0	1	-	1	0	0
100212852|F|0-11:G>A-11:G>A	100212852	40219	TGCAGGTCGGCACAGTGGGCCTTAAGCCGGCATGAGATCGGAAGAGCGGTTCAGCAGGAATGCCGAGAC	TGCAGRTCGGCRCWGTGGGCCTTAAGSCGGCATGAGATCGGAAGAGCGGTTCAGCAGGAATGCCGAGAC	3	1	11:G>A	11	0.500000	0.250000	0.750000	0.250000	0.750000	0.000000	0.375000	0.375000	0.375000	7.300.000	4.375.000	166.857	-0.250000	-0.22519	3	-0.03539	1.000.000	1.000.000	1.000.000	1.000.000	1.000.000	2.000.000	2.000.000	-	1	-	1	-	1	-	1	0	-	0	1	1
100212857|F|0--16:A>C	100212857	40221	TGCAGATGCCATACATAGGCAACATAAGCATGAGATCGGAAGAGCGGTTCAGCAGGAATGCCGAGACCG	TGCAGATGCCATACATMGGMAACATMAGCATGAGATCGGAAGAGCGGTTCAGCAGGAATGCCGAGACCG	3	2		16	0.625000	0.200000	0.800000	0.200000	0.800000	0.000000	0.320000	0.320000	0.320000	11.133.333	8.400.000	132.540	-0.200000	-0.22273	3	-0.05167	1.000.000	1.000.000	1.000.000	1.000.000	1.000.000	0.000000	0.000000	-	0	-	0	-	0	-	0	0	-	0	1	1
100212857|F|0-16:A>C-16:A>C	100212857	40221	TGCAGATGCCATACATCGGAAACATAAGCATGAGATCGGAAGAGCGGTTCAGCAGGAATGCCGAGACCG	TGCAGATGCCATACATMGGMAACATMAGCATGAGATCGGAAGAGCGGTTCAGCAGGAATGCCGAGACCG	3	2	16:A>C	16	0.625000	0.200000	0.800000	0.200000	0.800000	0.000000	0.320000	0.320000	0.320000	11.133.333	8.400.000	132.540	-0.200000	-0.22273	3	-0.05167	1.000.000	1.000.000	1.000.000	1.000.000	1.000.000	0.000000	0.000000	-	1	-	1	-	1	-	1	1	-	1	0	0
100212858|F|0--19:C>A	100212858	40221	TGCAGATGCCATACATCGGCAACATCAGCATGAGATCGGAAGAGCGGTTCAGCAGGAATGCCGAGACCG	TGCAGATGCCATACATMGGMAACATMAGCATGAGATCGGAAGAGCGGTTCAGCAGGAATGCCGAGACCG	3	2		19	0.625000	0.500000	0.600000	0.400000	0.500000	0.100000	0.500000	0.480000	0.490000	9.125.000	7.908.333	115.385	-0.300000	-0.30845	3	-0.04830	0.875000	1.000.000	0.937500	0.666667	1.000.000	3.000.000	2.000.000	-	0	-	0	-	0	-	0	1	-	0	1	1
100212858|F|0-19:C>A-19:C>A	100212858	40221	TGCAGATGCCATACATCGGAAACATAAGCATGAGATCGGAAGAGCGGTTCAGCAGGAATGCCGAGACCG	TGCAGATGCCATACATMGGMAACATMAGCATGAGATCGGAAGAGCGGTTCAGCAGGAATGCCGAGACCG	3	2	19:C>A	19	0.625000	0.500000	0.600000	0.400000	0.500000	0.100000	0.500000	0.480000	0.490000	9.125.000	7.908.333	115.385	-0.300000	-0.30845	3	-0.04830	0.875000	1.000.000	0.937500	0.666667	1.000.000	3.000.000	2.000.000	-	1	-	1	-	1	-	1	1	-	1	0	0
100212860|F|0--8:C>G	100212860	40222	TGCAGATGCCAGCTGAAAGGCATGAGATCGGAAGAGCGGTTCAGCAGGAATGCCGAGACCGATCTCGTA	TGCAGATGSYAGCYRAAAGGCATGAGATCGGAAGAGCGGTTCAGCAGGAATGCCGAGACCGATCTCGTA	3	4		8	0.500000	0.750000	0.250000	0.750000	0.250000	0.000000	0.375000	0.375000	0.375000	10.108.333	4.900.000	206.293	-0.250000	-0.18456	2	0.00000	1.000.000	1.000.000	1.000.000	1.000.000	1.000.000	1.000.000	1.000.000	-	1	-	1	-	1	-	1	1	-	1	0	0
100212860|F|0-8:C>G-8:C>G	100212860	40222	TGCAGATGGTAGCCAAAAGGCATGAGATCGGAAGAGCGGTTCAGCAGGAATGCCGAGACCGATCTCGTA	TGCAGATGSYAGCYRAAAGGCATGAGATCGGAAGAGCGGTTCAGCAGGAATGCCGAGACCGATCTCGTA	3	4	8:C>G	8	0.500000	0.750000	0.250000	0.750000	0.250000	0.000000	0.375000	0.375000	0.375000	10.108.333	4.900.000	206.293	-0.250000	-0.18456	2	0.00000	1.000.000	1.000.000	1.000.000	1.000.000	1.000.000	1.000.000	1.000.000	-	0	-	0	-	0	-	0	0	-	0	1	1
100212860|F|0--9:C>T	100212860	40222	TGCAGATGCCAGCTGAAAGGCATGAGATCGGAAGAGCGGTTCAGCAGGAATGCCGAGACCGATCTCGTA	TGCAGATGSYAGCYRAAAGGCATGAGATCGGAAGAGCGGTTCAGCAGGAATGCCGAGACCGATCTCGTA	3	3		9	0.562500	0.666667	0.333333	0.666667	0.333333	0.000000	0.444444	0.444444	0.444444	10.108.333	5.083.333	198.852	-0.333333	-0.23605	3	-0.09931	1.000.000	1.000.000	1.000.000	1.000.000	1.000.000	2.000.000	2.000.000	-	1	-	1	-	1	-	1	1	0	1	0	0
100212860|F|0-9:C>T-9:C>T	100212860	40222	TGCAGATGCTAGCCAAAAGGCATGAGATCGGAAGAGCGGTTCAGCAGGAATGCCGAGACCGATCTCGTA	TGCAGATGSYAGCYRAAAGGCATGAGATCGGAAGAGCGGTTCAGCAGGAATGCCGAGACCGATCTCGTA	3	3	9:C>T	9	0.562500	0.666667	0.333333	0.666667	0.333333	0.000000	0.444444	0.444444	0.444444	10.108.333	5.083.333	198.852	-0.333333	-0.23605	3	-0.09931	1.000.000	1.000.000	1.000.000	1.000.000	1.000.000	2.000.000	2.000.000	-	0	-	0	-	0	-	0	0	1	0	1	1
100212862|F|0--28:C>G	100212862	40223	TGCAGATGTTCACGGTGCAGGAGGTGGCCGAGTTTGTCAGGGGCACTCTGGGCAGCATGAGATCGGAAG	TGCAGATGTTCACGGTGCAGGAGGTGGCSGAGTTTGTSAGGGGCACDYTGGGCAGCATGAGATCGGAAG	3	3		28	0.500000	0.500000	0.500000	0.500000	0.500000	0.000000	0.500000	0.500000	0.500000	2.850.000	1.600.000	178.125	-0.500000	-0.23205	3	-0.08397	1.000.000	1.000.000	1.000.000	1.000.000	1.000.000	3.000.000	3.000.000	-	1	-	1	-	0	-	0	1	-	1	0	0
100212862|F|0-28:C>G-28:C>G	100212862	40223	TGCAGATGTTCACGGTGCAGGAGGTGGCGGAGTTTGTGAGGGGCACACTGGGCAGCATGAGATCGGAAG	TGCAGATGTTCACGGTGCAGGAGGTGGCSGAGTTTGTSAGGGGCACDYTGGGCAGCATGAGATCGGAAG	3	3	28:C>G	28	0.500000	0.500000	0.500000	0.500000	0.500000	0.000000	0.500000	0.500000	0.500000	2.850.000	1.600.000	178.125	-0.500000	-0.23205	3	-0.08397	1.000.000	1.000.000	1.000.000	1.000.000	1.000.000	3.000.000	3.000.000	-	0	-	0	-	1	-	1	0	-	0	1	1
100212868|F|0--5:T>A	100212868	40225	TGCAGTTTTGCTTCCTGTCGGCATGAGATCGGAAGAGCGGTTCAGCAGGAATGCCGAGACCGATCTCGT	TGCAGWTTTGCTTCCTGTCGGCATKAGATCGGAAGAGCGGTTCAGCAGGAATGCCGAGACCGATCTCGT	3	1		5	0.437500	0.571429	0.428571	0.571429	0.428571	0.000000	0.489796	0.489796	0.489796	7.350.000	3.060.000	240.196	-0.428571	-0.19543	3	-0.00013	1.000.000	1.000.000	1.000.000	1.000.000	1.000.000	2.000.000	2.000.000	-	1	-	1	-	-	-	-	1	0	1	0	0
100212868|F|0-5:T>A-5:T>A	100212868	40225	TGCAGATTTGCTTCCTGTCGGCATGAGATCGGAAGAGCGGTTCAGCAGGAATGCCGAGACCGATCTCGT	TGCAGWTTTGCTTCCTGTCGGCATKAGATCGGAAGAGCGGTTCAGCAGGAATGCCGAGACCGATCTCGT	3	1	5:T>A	5	0.437500	0.571429	0.428571	0.571429	0.428571	0.000000	0.489796	0.489796	0.489796	7.350.000	3.060.000	240.196	-0.428571	-0.19543	3	-0.00013	1.000.000	1.000.000	1.000.000	1.000.000	1.000.000	2.000.000	2.000.000	-	0	-	0	-	-	-	-	0	1	0	1	1
100212879|F|0--11:C>G	100212879	40232	TGCAGCACCGACACCAGCGCGCATGAGATCGGAAGAGCGGTTCAGCAGGAATGCCGAGACCGATCTCGT	TGCAGCACCGASACCASMGCGCATGAGATCGGAAGAGCGGTTCAGCAGGAATGCCGAGACCGATCTCGT	3	2		11	0.687500	0.181818	0.818182	0.181818	0.818182	0.000000	0.297521	0.297521	0.297521	3.625.000	2.061.111	175.876	-0.181818	-0.28313	3	-0.03020	1.000.000	1.000.000	1.000.000	1.000.000	1.000.000	2.000.000	2.000.000	-	0	-	0	-	0	-	0	0	0	0	0	0
100212879|F|0-11:C>G-11:C>G	100212879	40232	TGCAGCACCGAGACCACCGCGCATGAGATCGGAAGAGCGGTTCAGCAGGAATGCCGAGACCGATCTCGT	TGCAGCACCGASACCASMGCGCATGAGATCGGAAGAGCGGTTCAGCAGGAATGCCGAGACCGATCTCGT	3	2	11:C>G	11	0.687500	0.181818	0.818182	0.181818	0.818182	0.000000	0.297521	0.297521	0.297521	3.625.000	2.061.111	175.876	-0.181818	-0.28313	3	-0.03020	1.000.000	1.000.000	1.000.000	1.000.000	1.000.000	2.000.000	2.000.000	-	1	-	1	-	1	-	1	1	1	1	1	1
100212880|F|0--17:A>C	100212880	40232	TGCAGCACCGAGACCACAGCGCATGAGATCGGAAGAGCGGTTCAGCAGGAATGCCGAGACCGATCTCGT	TGCAGCACCGASACCASMGCGCATGAGATCGGAAGAGCGGTTCAGCAGGAATGCCGAGACCGATCTCGT	3	1		17	0.687500	0.272727	0.727273	0.272727	0.727273	0.000000	0.396694	0.396694	0.396694	2.450.000	2.306.250	106.233	-0.272727	-0.27435	3	-0.05774	1.000.000	1.000.000	1.000.000	1.000.000	1.000.000	2.000.000	2.000.000	-	0	-	0	-	0	-	0	0	1	0	1	1
100212880|F|0-17:A>C-17:A>C	100212880	40232	TGCAGCACCGAGACCACCGCGCATGAGATCGGAAGAGCGGTTCAGCAGGAATGCCGAGACCGATCTCGT	TGCAGCACCGASACCASMGCGCATGAGATCGGAAGAGCGGTTCAGCAGGAATGCCGAGACCGATCTCGT	3	1	17:A>C	17	0.687500	0.272727	0.727273	0.272727	0.727273	0.000000	0.396694	0.396694	0.396694	2.450.000	2.306.250	106.233	-0.272727	-0.27435	3	-0.05774	1.000.000	1.000.000	1.000.000	1.000.000	1.000.000	2.000.000	2.000.000	-	1	-	1	-	1	-	1	1	0	1	0	0
100212899|F|0--10:C>G	100212899	40243	TGCAGCAGAGCATCCTGGGCATGAGATCGGAAGAGCGGTTCAGCAGGAATGCCGAGACCGATCTCGTAT	TGCAGCMGAGSRWCCTGGGCATGAGATCGGAAGAGCGGTTCAGCAGGAATGCCGAGACCGATCTCGTAT	3	3		10	0.437500	0.714286	0.285714	0.714286	0.285714	0.000000	0.408163	0.408163	0.408163	5.590.000	3.233.333	172.887	-0.285714	-0.15397	3	-0.00004	1.000.000	1.000.000	1.000.000	1.000.000	1.000.000	1.000.000	1.000.000	1	-	1	-	1	-	1	1	-	-	-	0	0
100212899|F|0-10:C>G-10:C>G	100212899	40243	TGCAGCAGAGGGACCTGGGCATGAGATCGGAAGAGCGGTTCAGCAGGAATGCCGAGACCGATCTCGTAT	TGCAGCMGAGSRWCCTGGGCATGAGATCGGAAGAGCGGTTCAGCAGGAATGCCGAGACCGATCTCGTAT	3	3	10:C>G	10	0.437500	0.714286	0.285714	0.714286	0.285714	0.000000	0.408163	0.408163	0.408163	5.590.000	3.233.333	172.887	-0.285714	-0.15397	3	-0.00004	1.000.000	1.000.000	1.000.000	1.000.000	1.000.000	1.000.000	1.000.000	0	-	0	-	0	-	0	0	-	-	-	1	1
100212901|F|0--8:A>C	100212901	40244	TGCAGCAGAACGTTCTTTAGCCAGTCGCGCATGAGATCGGAAGAGCGGTTCAGCAGGAATGCCGAGACC	TGCAGCAGMACRTTCTTBAGCCAGTCRCGCATGAGATCGGAAGAGCGGTTCAGCAGGAATGCCGAGACC	3	4		8	0.562500	0.666667	0.333333	0.666667	0.333333	0.000000	0.444444	0.444444	0.444444	5.800.000	3.400.000	170.588	-0.333333	-0.22691	3	-0.08745	1.000.000	1.000.000	1.000.000	1.000.000	1.000.000	2.000.000	2.000.000	-	1	-	1	-	1	-	1	1	0	1	0	0
100212901|F|0-8:A>C-8:A>C	100212901	40244	TGCAGCAGCACATTCTTGAGCCAGTCACGCATGAGATCGGAAGAGCGGTTCAGCAGGAATGCCGAGACC	TGCAGCAGMACRTTCTTBAGCCAGTCRCGCATGAGATCGGAAGAGCGGTTCAGCAGGAATGCCGAGACC	3	4	8:A>C	8	0.562500	0.666667	0.333333	0.666667	0.333333	0.000000	0.444444	0.444444	0.444444	5.800.000	3.400.000	170.588	-0.333333	-0.22691	3	-0.08745	1.000.000	1.000.000	1.000.000	1.000.000	1.000.000	2.000.000	2.000.000	-	0	-	0	-	0	-	0	0	1	0	1	1
100212904|F|0--5:T>C	100212904	40245	TGCAGTGGCAGAGCCAATGATGAGGGGCAGCTTCTCCTGCATGAGATCGGAAGAGCGGTTCAGCAGGAA	TGCAGYRGCAGASCCAATRATGAGGGGCAGCTTCTCCTGCATGAGATCGGAAGAGCGGTTCAGCAGGAA	3	1		5	0.500000	0.250000	0.750000	0.250000	0.750000	0.000000	0.375000	0.375000	0.375000	7.400.000	5.490.909	134.768	-0.250000	-0.23474	3	-0.03890	1.000.000	1.000.000	1.000.000	1.000.000	1.000.000	2.000.000	2.000.000	-	0	-	0	-	0	-	0	1	-	1	0	0
100212904|F|0-5:T>C-5:T>C	100212904	40245	TGCAGCGGCAGAGCCAATGATGAGGGGCAGCTTCTCCTGCATGAGATCGGAAGAGCGGTTCAGCAGGAA	TGCAGYRGCAGASCCAATRATGAGGGGCAGCTTCTCCTGCATGAGATCGGAAGAGCGGTTCAGCAGGAA	3	1	5:T>C	5	0.500000	0.250000	0.750000	0.250000	0.750000	0.000000	0.375000	0.375000	0.375000	7.400.000	5.490.909	134.768	-0.250000	-0.23474	3	-0.03890	1.000.000	1.000.000	1.000.000	1.000.000	1.000.000	2.000.000	2.000.000	-	1	-	1	-	1	-	1	0	-	0	1	1
100212905|F|0--6:G>A	100212905	40245	TGCAGCGGCAGAGCCAATGATGAGGGGCAGCTTCTCCTGCATGAGATCGGAAGAGCGGTTCAGCAGGAA	TGCAGYRGCAGASCCAATRATGAGGGGCAGCTTCTCCTGCATGAGATCGGAAGAGCGGTTCAGCAGGAA	3	3		6	0.500000	0.750000	0.250000	0.750000	0.250000	0.000000	0.375000	0.375000	0.375000	6.375.000	4.566.667	139.599	-0.250000	-0.18853	3	-0.05159	1.000.000	1.000.000	1.000.000	1.000.000	1.000.000	1.000.000	1.000.000	-	1	-	1	-	1	-	1	1	-	1	0	0
100212905|F|0-6:G>A-6:G>A	100212905	40245	TGCAGCAGCAGACCCAATAATGAGGGGCAGCTTCTCCTGCATGAGATCGGAAGAGCGGTTCAGCAGGAA	TGCAGYRGCAGASCCAATRATGAGGGGCAGCTTCTCCTGCATGAGATCGGAAGAGCGGTTCAGCAGGAA	3	3	6:G>A	6	0.500000	0.750000	0.250000	0.750000	0.250000	0.000000	0.375000	0.375000	0.375000	6.375.000	4.566.667	139.599	-0.250000	-0.18853	3	-0.05159	1.000.000	1.000.000	1.000.000	1.000.000	1.000.000	1.000.000	1.000.000	-	0	-	0	-	0	-	0	0	-	0	1	1
100212912|F|0--10:C>A	100212912	40249	TGCAGCAGGCCACGCAGGTCAATGCCTGGGACCGCATGAGATCGGAAGAGCGGTTCAGCAGGAATGCCG	TGCAGCAGGCMACGCAGGTCAAYGCCTGGGAYCGCATGAGATCGGAAGAGCGGTTCAGCAGGAATGCCG	3	2		10	0.687500	0.181818	0.818182	0.181818	0.818182	0.000000	0.297521	0.297521	0.297521	3.550.000	2.237.500	158.659	-0.181818	-0.27667	3	-0.02270	1.000.000	1.000.000	1.000.000	1.000.000	1.000.000	2.000.000	2.000.000	-	0	-	0	-	0	-	0	0	0	0	0	0
100212912|F|0-10:C>A-10:C>A	100212912	40249	TGCAGCAGGCAACGCAGGTCAACGCCTGGGACCGCATGAGATCGGAAGAGCGGTTCAGCAGGAATGCCG	TGCAGCAGGCMACGCAGGTCAAYGCCTGGGAYCGCATGAGATCGGAAGAGCGGTTCAGCAGGAATGCCG	3	2	10:C>A	10	0.687500	0.181818	0.818182	0.181818	0.818182	0.000000	0.297521	0.297521	0.297521	3.550.000	2.237.500	158.659	-0.181818	-0.27667	3	-0.02270	1.000.000	1.000.000	1.000.000	1.000.000	1.000.000	2.000.000	2.000.000	-	1	-	1	-	1	-	1	1	1	1	1	1
100212913|F|0--31:C>T	100212913	40249	TGCAGCAGGCAACGCAGGTCAACGCCTGGGACCGCATGAGATCGGAAGAGCGGTTCAGCAGGAATGCCG	TGCAGCAGGCMACGCAGGTCAAYGCCTGGGAYCGCATGAGATCGGAAGAGCGGTTCAGCAGGAATGCCG	3	2		31	0.687500	0.909091	0.090909	0.909091	0.090909	0.000000	0.165289	0.165289	0.165289	2.611.111	1.500.000	174.074	-0.090909	-0.18489	3	-0.04168	1.000.000	1.000.000	1.000.000	1.000.000	1.000.000	1.000.000	1.000.000	-	1	-	1	-	1	-	1	1	0	1	1	1
100212913|F|0-31:C>T-31:C>T	100212913	40249	TGCAGCAGGCAACGCAGGTCAATGCCTGGGATCGCATGAGATCGGAAGAGCGGTTCAGCAGGAATGCCG	TGCAGCAGGCMACGCAGGTCAAYGCCTGGGAYCGCATGAGATCGGAAGAGCGGTTCAGCAGGAATGCCG	3	2	31:C>T	31	0.687500	0.909091	0.090909	0.909091	0.090909	0.000000	0.165289	0.165289	0.165289	2.611.111	1.500.000	174.074	-0.090909	-0.18489	3	-0.04168	1.000.000	1.000.000	1.000.000	1.000.000	1.000.000	1.000.000	1.000.000	-	0	-	0	-	0	-	0	0	1	0	0	0
100212920|F|0--6:A>C	100212920	40252	TGCAGCAGTCTTGGCTAAATTGCATGAGATCGGAAGAGCGGTTCAGCAGGAATGCCGAGACCGATCTCG	TGCAGCMGKCYTGGCTAAATTGCATGAGATCGGAAGAGCGGTTCAGCAGGAATGCCGAGACCGATCTCG	3	3		6	0.437500	0.857143	0.142857	0.857143	0.142857	0.000000	0.244898	0.244898	0.244898	2.666.667	300.000	888.889	-0.142857	-0.11747	2	0.00000	1.000.000	1.000.000	1.000.000	1.000.000	1.000.000	0.000000	0.000000	-	1	-	1	-	1	-	1	1	-	1	0	-
100212920|F|0-6:A>C-6:A>C	100212920	40252	TGCAGCCGGCCTGGCTAAATTGCATGAGATCGGAAGAGCGGTTCAGCAGGAATGCCGAGACCGATCTCG	TGCAGCMGKCYTGGCTAAATTGCATGAGATCGGAAGAGCGGTTCAGCAGGAATGCCGAGACCGATCTCG	3	3	6:A>C	6	0.437500	0.857143	0.142857	0.857143	0.142857	0.000000	0.244898	0.244898	0.244898	2.666.667	300.000	888.889	-0.142857	-0.11747	2	0.00000	1.000.000	1.000.000	1.000.000	1.000.000	1.000.000	0.000000	0.000000	-	0	-	0	-	0	-	0	0	-	0	1	-
100212920|F|0--8:T>G	100212920	40252	TGCAGCAGTCTTGGCTAAATTGCATGAGATCGGAAGAGCGGTTCAGCAGGAATGCCGAGACCGATCTCG	TGCAGCMGKCYTGGCTAAATTGCATGAGATCGGAAGAGCGGTTCAGCAGGAATGCCGAGACCGATCTCG	3	2		8	0.562500	0.666667	0.333333	0.666667	0.333333	0.000000	0.444444	0.444444	0.444444	2.666.667	1.325.000	201.258	-0.333333	-0.18862	3	0.00341	1.000.000	1.000.000	1.000.000	1.000.000	1.000.000	1.000.000	1.000.000	-	1	-	1	-	1	-	1	1	0	1	0	0
100212920|F|0-8:T>G-8:T>G	100212920	40252	TGCAGCAGGCCTGGCTAAATTGCATGAGATCGGAAGAGCGGTTCAGCAGGAATGCCGAGACCGATCTCG	TGCAGCMGKCYTGGCTAAATTGCATGAGATCGGAAGAGCGGTTCAGCAGGAATGCCGAGACCGATCTCG	3	2	8:T>G	8	0.562500	0.666667	0.333333	0.666667	0.333333	0.000000	0.444444	0.444444	0.444444	2.666.667	1.325.000	201.258	-0.333333	-0.18862	3	0.00341	1.000.000	1.000.000	1.000.000	1.000.000	1.000.000	1.000.000	1.000.000	-	0	-	0	-	0	-	0	0	1	0	1	1
100212931|F|0--7:C>A	100212931	40260	TGCAGCCCAACTACCAGTCACCCCCGAGCATGAGATCGGAAGAGCGGTTCAGCAGGAATGCCGAGACCG	TGCAGCCMAAYTACCAGTCACCCCCGAGCMTGAGATCGGAAGAGCGGTTCAGCAGGAATGCCGAGACCG	3	2		7	0.500000	0.750000	0.250000	0.750000	0.250000	0.000000	0.375000	0.375000	0.375000	6.333.333	4.900.000	129.252	-0.250000	-0.18133	3	0.00048	1.000.000	1.000.000	1.000.000	1.000.000	1.000.000	0.000000	0.000000	-	1	-	1	-	1	-	1	1	-	1	0	0
100212931|F|0-7:C>A-7:C>A	100212931	40260	TGCAGCCAAATTACCAGTCACCCCCGAGCATGAGATCGGAAGAGCGGTTCAGCAGGAATGCCGAGACCG	TGCAGCCMAAYTACCAGTCACCCCCGAGCMTGAGATCGGAAGAGCGGTTCAGCAGGAATGCCGAGACCG	3	2	7:C>A	7	0.500000	0.750000	0.250000	0.750000	0.250000	0.000000	0.375000	0.375000	0.375000	6.333.333	4.900.000	129.252	-0.250000	-0.18133	3	0.00048	1.000.000	1.000.000	1.000.000	1.000.000	1.000.000	0.000000	0.000000	-	0	-	0	-	0	-	0	0	-	0	1	1
100212933|F|0--48:C>T	100212933	40261	TGCAGCCAATGACCTTTTCAGGTTGACGGATGGCTCTATTTATACTTACGCAGGCATGAGATCGGAAGA	TGCAGCCAATGACCTTTTCAGGTTGACGGATGGCTCTATTTATACTTAYGCRGGCATGAGATCGGAAGA	3	2		48	0.562500	0.111111	0.888889	0.111111	0.888889	0.000000	0.197531	0.197531	0.197531	1.700.000	1.500.000	113.333	-0.111111	-0.14641	3	-0.01275	1.000.000	1.000.000	1.000.000	1.000.000	1.000.000	1.000.000	1.000.000	-	0	-	0	-	0	-	0	0	1	0	0	0
100212933|F|0-48:C>T-48:C>T	100212933	40261	TGCAGCCAATGACCTTTTCAGGTTGACGGATGGCTCTATTTATACTTATGCGGGCATGAGATCGGAAGA	TGCAGCCAATGACCTTTTCAGGTTGACGGATGGCTCTATTTATACTTAYGCRGGCATGAGATCGGAAGA	3	2	48:C>T	48	0.562500	0.111111	0.888889	0.111111	0.888889	0.000000	0.197531	0.197531	0.197531	1.700.000	1.500.000	113.333	-0.111111	-0.14641	3	-0.01275	1.000.000	1.000.000	1.000.000	1.000.000	1.000.000	1.000.000	1.000.000	-	1	-	1	-	1	-	1	1	0	1	1	1
100212936|F|0--5:A>C	100212936	40263	TGCAGACACAGATGTCATGTGAAAATCCGCATGAGATCGGAAGAGCGGTTCAGCAGGAATGCCGAGACC	TGCAGMCMCAGATGTCATGTGAAAATCCGCATGAGATCGGAAGAGCGGTTCAGCAGGAATGCCGAGACC	3	1		5	0.687500	0.181818	0.818182	0.181818	0.818182	0.000000	0.297521	0.297521	0.297521	9.100.000	7.052.941	129.024	-0.181818	-0.30720	3	0.00014	1.000.000	1.000.000	1.000.000	1.000.000	1.000.000	2.000.000	2.000.000	-	0	-	0	-	0	-	0	0	0	0	0	0
100212936|F|0-5:A>C-5:A>C	100212936	40263	TGCAGCCACAGATGTCATGTGAAAATCCGCATGAGATCGGAAGAGCGGTTCAGCAGGAATGCCGAGACC	TGCAGMCMCAGATGTCATGTGAAAATCCGCATGAGATCGGAAGAGCGGTTCAGCAGGAATGCCGAGACC	3	1	5:A>C	5	0.687500	0.181818	0.818182	0.181818	0.818182	0.000000	0.297521	0.297521	0.297521	9.100.000	7.052.941	129.024	-0.181818	-0.30720	3	0.00014	1.000.000	1.000.000	1.000.000	1.000.000	1.000.000	2.000.000	2.000.000	-	1	-	1	-	1	-	1	1	1	1	1	1
100212938|F|0--5:C>A	100212938	40264	TGCAGCCACATCGATCGCATGAGATCGGAAGAGCGGTTCAGCAGGAATGCCGAGACCGATCTCGTATGC	TGCAGMCACRWCGMTCGCATGAGATCGGAAGAGCGGTTCAGCAGGAATGCCGAGACCGATCTCGTATGC	3	3		5	0.500000	0.250000	0.750000	0.250000	0.750000	0.000000	0.375000	0.375000	0.375000	2.450.000	2.325.000	105.376	-0.250000	-0.14472	3	-0.02464	1.000.000	1.000.000	1.000.000	1.000.000	1.000.000	0.000000	0.000000	-	0	-	0	-	0	-	0	0	-	0	1	1
100212938|F|0-5:C>A-5:C>A	100212938	40264	TGCAGACACAACGCTCGCATGAGATCGGAAGAGCGGTTCAGCAGGAATGCCGAGACCGATCTCGTATGC	TGCAGMCACRWCGMTCGCATGAGATCGGAAGAGCGGTTCAGCAGGAATGCCGAGACCGATCTCGTATGC	3	3	5:C>A	5	0.500000	0.250000	0.750000	0.250000	0.750000	0.000000	0.375000	0.375000	0.375000	2.450.000	2.325.000	105.376	-0.250000	-0.14472	3	-0.02464	1.000.000	1.000.000	1.000.000	1.000.000	1.000.000	0.000000	0.000000	-	1	-	1	-	1	-	1	1	-	1	0	0
100212939|F|0--9:A>G	100212939	40264	TGCAGACACAACGCTCGCATGAGATCGGAAGAGCGGTTCAGCAGGAATGCCGAGACCGATCTCGTATGC	TGCAGMCACRWCGMTCGCATGAGATCGGAAGAGCGGTTCAGCAGGAATGCCGAGACCGATCTCGTATGC	3	1		9	0.500000	0.750000	0.250000	0.750000	0.250000	0.000000	0.375000	0.375000	0.375000	2.660.000	1.550.000	171.613	-0.250000	-0.16979	3	-0.02046	1.000.000	1.000.000	1.000.000	1.000.000	1.000.000	2.000.000	2.000.000	-	1	-	1	-	0	-	0	1	-	1	1	1
100212939|F|0-9:A>G-9:A>G	100212939	40264	TGCAGACACGACGCTCGCATGAGATCGGAAGAGCGGTTCAGCAGGAATGCCGAGACCGATCTCGTATGC	TGCAGMCACRWCGMTCGCATGAGATCGGAAGAGCGGTTCAGCAGGAATGCCGAGACCGATCTCGTATGC	3	1	9:A>G	9	0.500000	0.750000	0.250000	0.750000	0.250000	0.000000	0.375000	0.375000	0.375000	2.660.000	1.550.000	171.613	-0.250000	-0.16979	3	-0.02046	1.000.000	1.000.000	1.000.000	1.000.000	1.000.000	2.000.000	2.000.000	-	0	-	0	-	1	-	1	0	-	0	0	0
100212942|F|0--31:A>G	100212942	40266	TGCAGCCAGACTCCAAGGACAAAAGCCAGGCATTTGCTAGCATGAGATCGGAAGAGCGGTTCAGCAGGA	TGCAGCCAGACTCCAAGGACAAAAGCCAGGCRYTYKCTAGCATGAGATCGGAAGAGCGGTTCAGCAGGA	3	3		31	0.625000	0.800000	0.200000	0.800000	0.200000	0.000000	0.320000	0.320000	0.320000	5.668.750	3.533.333	160.436	-0.200000	-0.22853	3	-0.05523	1.000.000	1.000.000	1.000.000	1.000.000	1.000.000	1.000.000	1.000.000	-	1	-	1	-	1	-	1	1	-	1	0	0
100212942|F|0-31:A>G-31:A>G	100212942	40266	TGCAGCCAGACTCCAAGGACAAAAGCCAGGCGCTCGCTAGCATGAGATCGGAAGAGCGGTTCAGCAGGA	TGCAGCCAGACTCCAAGGACAAAAGCCAGGCRYTYKCTAGCATGAGATCGGAAGAGCGGTTCAGCAGGA	3	3	31:A>G	31	0.625000	0.800000	0.200000	0.800000	0.200000	0.000000	0.320000	0.320000	0.320000	5.668.750	3.533.333	160.436	-0.200000	-0.22853	3	-0.05523	1.000.000	1.000.000	1.000.000	1.000.000	1.000.000	1.000.000	1.000.000	-	0	-	0	-	0	-	0	0	-	0	1	1
100212942|F|0--34:T>C	100212942	40266	TGCAGCCAGACTCCAAGGACAAAAGCCAGGCATTTGCTAGCATGAGATCGGAAGAGCGGTTCAGCAGGA	TGCAGCCAGACTCCAAGGACAAAAGCCAGGCRYTYKCTAGCATGAGATCGGAAGAGCGGTTCAGCAGGA	3	2		34	0.625000	0.600000	0.400000	0.600000	0.400000	0.000000	0.480000	0.480000	0.480000	5.483.333	5.071.429	108.122	-0.400000	-0.31712	3	-0.06867	1.000.000	1.000.000	1.000.000	1.000.000	1.000.000	3.000.000	3.000.000	-	1	-	1	-	1	-	1	1	-	1	0	0
100212942|F|0-34:T>C-34:T>C	100212942	40266	TGCAGCCAGACTCCAAGGACAAAAGCCAGGCATTCTCTAGCATGAGATCGGAAGAGCGGTTCAGCAGGA	TGCAGCCAGACTCCAAGGACAAAAGCCAGGCRYTYKCTAGCATGAGATCGGAAGAGCGGTTCAGCAGGA	3	2	34:T>C	34	0.625000	0.600000	0.400000	0.600000	0.400000	0.000000	0.480000	0.480000	0.480000	5.483.333	5.071.429	108.122	-0.400000	-0.31712	3	-0.06867	1.000.000	1.000.000	1.000.000	1.000.000	1.000.000	3.000.000	3.000.000	-	0	-	0	-	0	-	0	0	-	0	1	1
100212968|F|0--19:T>C	100212968	40278	TGCAGCCTGGAGGCGTGTGTTCTCCACCGGCATGAGATCGGAAGAGCGGTTCAGCAGGAATGCCGAGAC	TGCAGCCTGGAVGCGTGTGYTCTCCACYGGCATGAGATCGGAAGAGCGGTTCAGCAGGAATGCCGAGAC	3	3		19	0.500000	0.750000	0.250000	0.750000	0.250000	0.000000	0.375000	0.375000	0.375000	5.916.667	5.050.000	117.162	-0.250000	-0.17802	3	-0.03268	1.000.000	1.000.000	1.000.000	1.000.000	1.000.000	0.000000	0.000000	-	1	-	1	-	1	-	1	1	-	1	0	0
100212968|F|0-19:T>C-19:T>C	100212968	40278	TGCAGCCTGGACGCGTGTGCTCTCCACTGGCATGAGATCGGAAGAGCGGTTCAGCAGGAATGCCGAGAC	TGCAGCCTGGAVGCGTGTGYTCTCCACYGGCATGAGATCGGAAGAGCGGTTCAGCAGGAATGCCGAGAC	3	3	19:T>C	19	0.500000	0.750000	0.250000	0.750000	0.250000	0.000000	0.375000	0.375000	0.375000	5.916.667	5.050.000	117.162	-0.250000	-0.17802	3	-0.03268	1.000.000	1.000.000	1.000.000	1.000.000	1.000.000	0.000000	0.000000	-	0	-	0	-	0	-	0	0	-	0	1	1
100212980|F|0--5:T>C	100212980	40285	TGCAGTCCATCTCCGAGGTTGGGCATGAGATCGGAAGAGCGGTTCAGCAGGAATGCCGAGACCGATCTC	TGCAGBSSRTCTCCGAGGTTSGGCATGAGATCGGAAGAGCGGTTCAGCAGGAATGCCGAGACCGATCTC	3	3		5	0.500000	0.750000	0.250000	0.750000	0.250000	0.000000	0.375000	0.375000	0.375000	5.966.667	3.566.667	167.290	-0.250000	-0.19025	2	0.00000	1.000.000	1.000.000	1.000.000	1.000.000	1.000.000	1.000.000	1.000.000	-	1	-	1	-	1	-	1	1	-	1	0	0
100212980|F|0-5:T>C-5:T>C	100212980	40285	TGCAGCGCGTCTCCGAGGTTGGGCATGAGATCGGAAGAGCGGTTCAGCAGGAATGCCGAGACCGATCTC	TGCAGBSSRTCTCCGAGGTTSGGCATGAGATCGGAAGAGCGGTTCAGCAGGAATGCCGAGACCGATCTC	3	3	5:T>C	5	0.500000	0.750000	0.250000	0.750000	0.250000	0.000000	0.375000	0.375000	0.375000	5.966.667	3.566.667	167.290	-0.250000	-0.19025	2	0.00000	1.000.000	1.000.000	1.000.000	1.000.000	1.000.000	1.000.000	1.000.000	-	0	-	0	-	0	-	0	0	-	0	1	1
100212980|F|0--7:C>G	100212980	40285	TGCAGTCCATCTCCGAGGTTGGGCATGAGATCGGAAGAGCGGTTCAGCAGGAATGCCGAGACCGATCTC	TGCAGBSSRTCTCCGAGGTTSGGCATGAGATCGGAAGAGCGGTTCAGCAGGAATGCCGAGACCGATCTC	3	5		7	0.562500	0.888889	0.111111	0.888889	0.111111	0.000000	0.197531	0.197531	0.197531	5.486.667	4.050.000	135.473	-0.111111	-0.15649	3	-0.02051	1.000.000	1.000.000	1.000.000	1.000.000	1.000.000	1.000.000	1.000.000	-	1	-	1	-	1	-	1	1	0	1	1	1
100212980|F|0-7:C>G-7:C>G	100212980	40285	TGCAGGGGGTCTCCGAGGTTCGGCATGAGATCGGAAGAGCGGTTCAGCAGGAATGCCGAGACCGATCTC	TGCAGBSSRTCTCCGAGGTTSGGCATGAGATCGGAAGAGCGGTTCAGCAGGAATGCCGAGACCGATCTC	3	5	7:C>G	7	0.562500	0.888889	0.111111	0.888889	0.111111	0.000000	0.197531	0.197531	0.197531	5.486.667	4.050.000	135.473	-0.111111	-0.15649	3	-0.02051	1.000.000	1.000.000	1.000.000	1.000.000	1.000.000	1.000.000	1.000.000	-	0	-	0	-	0	-	0	0	1	0	0	0
100212983|F|0--5:G>C	100212983	40286	TGCAGGGCATTCCGGGAGCCTTTGCGACAGCATGAGATCGGAAGAGCGGTTCAGCAGGAATGCCGAGAC	TGCAGSGCRTTCCGGGARCCTYTGCGRCAGCATGAGATCGGAAGAGCGGTTCAGCAGGAATGCCGAGAC	3	4		5	0.625000	0.200000	0.800000	0.200000	0.800000	0.000000	0.320000	0.320000	0.320000	7.350.000	4.333.333	169.615	-0.200000	-0.30027	3	-0.03138	1.000.000	1.000.000	1.000.000	1.000.000	1.000.000	2.000.000	2.000.000	-	0	-	0	-	0	-	0	0	-	0	0	0
100212983|F|0-5:G>C-5:G>C	100212983	40286	TGCAGCGCGTTCCGGGAGCCTCTGCGGCAGCATGAGATCGGAAGAGCGGTTCAGCAGGAATGCCGAGAC	TGCAGSGCRTTCCGGGARCCTYTGCGRCAGCATGAGATCGGAAGAGCGGTTCAGCAGGAATGCCGAGAC	3	4	5:G>C	5	0.625000	0.200000	0.800000	0.200000	0.800000	0.000000	0.320000	0.320000	0.320000	7.350.000	4.333.333	169.615	-0.200000	-0.30027	3	-0.03138	1.000.000	1.000.000	1.000.000	1.000.000	1.000.000	2.000.000	2.000.000	-	1	-	1	-	1	-	1	1	-	1	1	1
100212984|F|0--17:A>G	100212984	40286	TGCAGCGCGTTCCGGGAACCTTTGCGACAGCATGAGATCGGAAGAGCGGTTCAGCAGGAATGCCGAGAC	TGCAGSGCRTTCCGGGARCCTYTGCGRCAGCATGAGATCGGAAGAGCGGTTCAGCAGGAATGCCGAGAC	3	3		17	0.500000	0.250000	0.750000	0.250000	0.750000	0.000000	0.375000	0.375000	0.375000	5.033.333	4.158.333	121.042	-0.250000	-0.18252	2	0.00000	1.000.000	1.000.000	1.000.000	1.000.000	1.000.000	0.000000	0.000000	-	0	-	0	-	0	-	0	0	-	0	1	1
100212984|F|0-17:A>G-17:A>G	100212984	40286	TGCAGCGCGTTCCGGGAGCCTCTGCGGCAGCATGAGATCGGAAGAGCGGTTCAGCAGGAATGCCGAGAC	TGCAGSGCRTTCCGGGARCCTYTGCGRCAGCATGAGATCGGAAGAGCGGTTCAGCAGGAATGCCGAGAC	3	3	17:A>G	17	0.500000	0.250000	0.750000	0.250000	0.750000	0.000000	0.375000	0.375000	0.375000	5.033.333	4.158.333	121.042	-0.250000	-0.18252	2	0.00000	1.000.000	1.000.000	1.000.000	1.000.000	1.000.000	0.000000	0.000000	-	1	-	1	-	1	-	1	1	-	1	0	0
100212987|F|0--5:A>G	100212987	40288	TGCAGAGGCTGGCTGACCCGCATGAGATCGGAAGAGCGGTTCAGCAGGAATGCCGAGACCGATCTCGTA	TGCAGVGGCTGGCTGACCCGCATGAGATCGGAAGAGCGGTTCAGCAGGAATGCCGAGACCGATCTCGTA	3	1		5	0.500000	0.250000	0.750000	0.250000	0.750000	0.000000	0.375000	0.375000	0.375000	7.650.000	3.466.667	220.673	-0.250000	-0.25349	2	0.00000	1.000.000	1.000.000	1.000.000	1.000.000	1.000.000	2.000.000	2.000.000	-	0	-	0	-	0	-	0	0	-	0	-	-
100212987|F|0-5:A>G-5:A>G	100212987	40288	TGCAGGGGCTGGCTGACCCGCATGAGATCGGAAGAGCGGTTCAGCAGGAATGCCGAGACCGATCTCGTA	TGCAGVGGCTGGCTGACCCGCATGAGATCGGAAGAGCGGTTCAGCAGGAATGCCGAGACCGATCTCGTA	3	1	5:A>G	5	0.500000	0.250000	0.750000	0.250000	0.750000	0.000000	0.375000	0.375000	0.375000	7.650.000	3.466.667	220.673	-0.250000	-0.25349	2	0.00000	1.000.000	1.000.000	1.000.000	1.000.000	1.000.000	2.000.000	2.000.000	-	1	-	1	-	1	-	1	1	-	1	-	-
100212992|F|0--8:C>G	100212992	40291	TGCAGCGTCTACTACCATGGCTGTCACCTGAATGGGAAGAGCACCCACTACCACTGCATGAGATCGGAA	TGCAGCGTSTACTACCAYGGCTGTCAYCTSAATGGGAAGAGCACMCACTACCACTGCATGAGATCGGAA	3	3		8	0.500000	0.250000	0.750000	0.250000	0.750000	0.000000	0.375000	0.375000	0.375000	6.025.000	4.475.000	134.637	-0.250000	-0.25903	2	0.00000	1.000.000	1.000.000	1.000.000	1.000.000	1.000.000	2.000.000	2.000.000	-	0	-	0	-	0	-	0	0	-	0	-	-
100212992|F|0-8:C>G-8:C>G	100212992	40291	TGCAGCGTGTACTACCATGGCTGTCACCTCAATGGGAAGAGCACACACTACCACTGCATGAGATCGGAA	TGCAGCGTSTACTACCAYGGCTGTCAYCTSAATGGGAAGAGCACMCACTACCACTGCATGAGATCGGAA	3	3	8:C>G	8	0.500000	0.250000	0.750000	0.250000	0.750000	0.000000	0.375000	0.375000	0.375000	6.025.000	4.475.000	134.637	-0.250000	-0.25903	2	0.00000	1.000.000	1.000.000	1.000.000	1.000.000	1.000.000	2.000.000	2.000.000	-	1	-	1	-	1	-	1	1	-	1	-	-
100212993|F|0--17:T>C	100212993	40291	TGCAGCGTGTACTACCATGGCTGTCACCTCAATGGGAAGAGCACACACTACCACTGCATGAGATCGGAA	TGCAGCGTSTACTACCAYGGCTGTCAYCTSAATGGGAAGAGCACMCACTACCACTGCATGAGATCGGAA	3	3		17	0.625000	0.800000	0.200000	0.800000	0.200000	0.000000	0.320000	0.320000	0.320000	4.862.500	3.300.000	147.348	-0.200000	-0.23670	3	-0.05446	1.000.000	1.000.000	1.000.000	1.000.000	1.000.000	1.000.000	1.000.000	-	1	-	1	-	1	-	1	1	-	1	0	0
100212993|F|0-17:T>C-17:T>C	100212993	40291	TGCAGCGTCTACTACCACGGCTGTCATCTCAATGGGAAGAGCACACACTACCACTGCATGAGATCGGAA	TGCAGCGTSTACTACCAYGGCTGTCAYCTSAATGGGAAGAGCACMCACTACCACTGCATGAGATCGGAA	3	3	17:T>C	17	0.625000	0.800000	0.200000	0.800000	0.200000	0.000000	0.320000	0.320000	0.320000	4.862.500	3.300.000	147.348	-0.200000	-0.23670	3	-0.05446	1.000.000	1.000.000	1.000.000	1.000.000	1.000.000	1.000.000	1.000.000	-	0	-	0	-	0	-	0	0	-	0	1	1
100213000|F|0--7:G>T	100213000	40294	TGCAGCTGGCTGGCATCATGGGCAAGAATGAGTGCATGAGATCGGAAGAGCGGTTCAGCAGGAATGCCG	TGCAGCTDGCKGGCATCATGGGCAAGAAYGAGTGCATGAGATCGGAAGAGCGGTTCAGCAGGAATGCCG	3	3		7	0.437500	0.857143	0.285714	0.714286	0.142857	0.142857	0.244898	0.408163	0.326531	5.241.667	2.866.667	182.849	0.000000	-0.13453	2	0.00000	1.000.000	0.857143	0.928571	1.000.000	0.500000	1.000.000	2.000.000	-	1	-	1	-	1	-	1	1	0	1	-	-
100213000|F|0-7:G>T-7:G>T	100213000	40294	TGCAGCTTGCGGGCATCATGGGCAAGAACGAGTGCATGAGATCGGAAGAGCGGTTCAGCAGGAATGCCG	TGCAGCTDGCKGGCATCATGGGCAAGAAYGAGTGCATGAGATCGGAAGAGCGGTTCAGCAGGAATGCCG	3	3	7:G>T	7	0.437500	0.857143	0.285714	0.714286	0.142857	0.142857	0.244898	0.408163	0.326531	5.241.667	2.866.667	182.849	0.000000	-0.13453	2	0.00000	1.000.000	0.857143	0.928571	1.000.000	0.500000	1.000.000	2.000.000	-	0	-	0	-	0	-	1	0	1	0	-	-
100213000|F|0--10:T>G	100213000	40294	TGCAGCTGGCTGGCATCATGGGCAAGAATGAGTGCATGAGATCGGAAGAGCGGTTCAGCAGGAATGCCG	TGCAGCTDGCKGGCATCATGGGCAAGAAYGAGTGCATGAGATCGGAAGAGCGGTTCAGCAGGAATGCCG	3	3		10	0.562500	0.666667	0.444444	0.555556	0.333333	0.111111	0.444444	0.493827	0.469136	5.241.667	5.220.000	100.415	-0.222222	-0.21910	3	-0.05017	1.000.000	0.857143	0.928571	1.000.000	0.500000	1.000.000	2.000.000	-	1	-	1	-	1	-	1	1	0	1	0	0
100213000|F|0-10:T>G-10:T>G	100213000	40294	TGCAGCTAGCGGGCATCATGGGCAAGAACGAGTGCATGAGATCGGAAGAGCGGTTCAGCAGGAATGCCG	TGCAGCTDGCKGGCATCATGGGCAAGAAYGAGTGCATGAGATCGGAAGAGCGGTTCAGCAGGAATGCCG	3	3	10:T>G	10	0.562500	0.666667	0.444444	0.555556	0.333333	0.111111	0.444444	0.493827	0.469136	5.241.667	5.220.000	100.415	-0.222222	-0.21910	3	-0.05017	1.000.000	0.857143	0.928571	1.000.000	0.500000	1.000.000	2.000.000	-	0	-	0	-	0	-	1	0	1	0	1	1
100213009|F|0--10:C>G	100213009	40298	TGCAGCTCCACCAAAGAGCTTCTGCTGTGTGGCATGAGATCGGAAGAGCGGTTCAGCAGGAATGCCGAG	TGCAGCTCCASCARRGASCTYCTGCTGTGTGGCATGAGATCGGAAGAGCGGTTCAGCAGGAATGCCGAG	3	3		10	0.500000	0.750000	0.250000	0.750000	0.250000	0.000000	0.375000	0.375000	0.375000	4.158.333	3.466.667	119.952	-0.250000	-0.18478	3	-0.03209	1.000.000	1.000.000	1.000.000	1.000.000	1.000.000	0.000000	0.000000	-	1	-	1	-	1	-	1	1	-	1	0	0
100213009|F|0-10:C>G-10:C>G	100213009	40298	TGCAGCTCCAGCAGAGAGCTCCTGCTGTGTGGCATGAGATCGGAAGAGCGGTTCAGCAGGAATGCCGAG	TGCAGCTCCASCARRGASCTYCTGCTGTGTGGCATGAGATCGGAAGAGCGGTTCAGCAGGAATGCCGAG	3	3	10:C>G	10	0.500000	0.750000	0.250000	0.750000	0.250000	0.000000	0.375000	0.375000	0.375000	4.158.333	3.466.667	119.952	-0.250000	-0.18478	3	-0.03209	1.000.000	1.000.000	1.000.000	1.000.000	1.000.000	0.000000	0.000000	-	0	-	0	-	0	-	0	0	-	0	1	1
100213009|F|0--14:A>G	100213009	40298	TGCAGCTCCACCAAAGAGCTTCTGCTGTGTGGCATGAGATCGGAAGAGCGGTTCAGCAGGAATGCCGAG	TGCAGCTCCASCARRGASCTYCTGCTGTGTGGCATGAGATCGGAAGAGCGGTTCAGCAGGAATGCCGAG	3	3		14	0.500000	0.750000	0.250000	0.750000	0.250000	0.000000	0.375000	0.375000	0.375000	4.218.182	3.475.000	121.387	-0.250000	-0.19985	3	-0.02980	1.000.000	1.000.000	1.000.000	1.000.000	1.000.000	2.000.000	2.000.000	-	1	-	1	-	0	-	0	1	-	1	1	1
100213009|F|0-14:A>G-14:A>G	100213009	40298	TGCAGCTCCACCAAGGACCTCCTGCTGTGTGGCATGAGATCGGAAGAGCGGTTCAGCAGGAATGCCGAG	TGCAGCTCCASCARRGASCTYCTGCTGTGTGGCATGAGATCGGAAGAGCGGTTCAGCAGGAATGCCGAG	3	3	14:A>G	14	0.500000	0.750000	0.250000	0.750000	0.250000	0.000000	0.375000	0.375000	0.375000	4.218.182	3.475.000	121.387	-0.250000	-0.19985	3	-0.02980	1.000.000	1.000.000	1.000.000	1.000.000	1.000.000	2.000.000	2.000.000	-	0	-	0	-	1	-	1	0	-	0	0	0
100213012|F|0--19:T>C	100213012	40299	TGCAGCTCCGTGACGTGACTACACGGGAGAGCCTGCATGAGATCGGAAGAGCGGTTCAGCAGGAATGCC	TGCAGCTCCGTGACGTGACYRCWCGGGAGMGCCTGCATGAGATCGGAAGAGCGGTTCAGCAGGAATGCC	3	3		19	0.562500	0.666667	0.333333	0.666667	0.333333	0.000000	0.444444	0.444444	0.444444	6.141.667	3.080.000	199.405	-0.333333	-0.22271	3	-0.00006	1.000.000	1.000.000	1.000.000	1.000.000	1.000.000	2.000.000	2.000.000	-	1	-	1	-	1	-	1	1	0	1	0	0
100213012|F|0-19:T>C-19:T>C	100213012	40299	TGCAGCTCCGTGACGTGACCGCTCGGGAGAGCCTGCATGAGATCGGAAGAGCGGTTCAGCAGGAATGCC	TGCAGCTCCGTGACGTGACYRCWCGGGAGMGCCTGCATGAGATCGGAAGAGCGGTTCAGCAGGAATGCC	3	3	19:T>C	19	0.562500	0.666667	0.333333	0.666667	0.333333	0.000000	0.444444	0.444444	0.444444	6.141.667	3.080.000	199.405	-0.333333	-0.22271	3	-0.00006	1.000.000	1.000.000	1.000.000	1.000.000	1.000.000	2.000.000	2.000.000	-	0	-	0	-	0	-	0	0	1	0	1	1
100213017|F|0--7:A>C	100213017	40301	TGCAGCTAGCATCGCGCATCCACCGCATGAGATCGGAAGAGCGGTTCAGCAGGAATGCCGAGACCGATC	TGCAGCTVGCMTCGCGCATCCACCGCATGAGATCGGAAGAGCGGTTCAGCAGGAATGCCGAGACCGATC	3	2		7	0.500000	0.750000	0.250000	0.750000	0.250000	0.000000	0.375000	0.375000	0.375000	4.366.667	1.375.000	317.576	-0.250000	-0.15951	2	0.00000	1.000.000	1.000.000	1.000.000	1.000.000	1.000.000	1.000.000	1.000.000	-	1	-	1	-	1	-	1	1	-	1	0	0
100213017|F|0-7:A>C-7:A>C	100213017	40301	TGCAGCTCGCCTCGCGCATCCACCGCATGAGATCGGAAGAGCGGTTCAGCAGGAATGCCGAGACCGATC	TGCAGCTVGCMTCGCGCATCCACCGCATGAGATCGGAAGAGCGGTTCAGCAGGAATGCCGAGACCGATC	3	2	7:A>C	7	0.500000	0.750000	0.250000	0.750000	0.250000	0.000000	0.375000	0.375000	0.375000	4.366.667	1.375.000	317.576	-0.250000	-0.15951	2	0.00000	1.000.000	1.000.000	1.000.000	1.000.000	1.000.000	1.000.000	1.000.000	-	0	-	0	-	0	-	0	0	-	0	1	1
100213017|F|0--10:A>C	100213017	40301	TGCAGCTAGCATCGCGCATCCACCGCATGAGATCGGAAGAGCGGTTCAGCAGGAATGCCGAGACCGATC	TGCAGCTVGCMTCGCGCATCCACCGCATGAGATCGGAAGAGCGGTTCAGCAGGAATGCCGAGACCGATC	3	2		10	0.625000	0.600000	0.400000	0.600000	0.400000	0.000000	0.480000	0.480000	0.480000	4.366.667	3.575.000	122.145	-0.400000	-0.31162	3	-0.04947	1.000.000	1.000.000	1.000.000	1.000.000	1.000.000	3.000.000	3.000.000	-	1	-	1	-	1	-	1	1	-	1	0	0
100213017|F|0-10:A>C-10:A>C	100213017	40301	TGCAGCTGGCCTCGCGCATCCACCGCATGAGATCGGAAGAGCGGTTCAGCAGGAATGCCGAGACCGATC	TGCAGCTVGCMTCGCGCATCCACCGCATGAGATCGGAAGAGCGGTTCAGCAGGAATGCCGAGACCGATC	3	2	10:A>C	10	0.625000	0.600000	0.400000	0.600000	0.400000	0.000000	0.480000	0.480000	0.480000	4.366.667	3.575.000	122.145	-0.400000	-0.31162	3	-0.04947	1.000.000	1.000.000	1.000.000	1.000.000	1.000.000	3.000.000	3.000.000	-	0	-	0	-	0	-	0	0	-	0	1	1
100213019|F|0--9:G>A	100213019	40302	TGCAGCTGAGCAAATGTTTGCTGCATGAGATCGGAAGAGCGGTTCAGCAGGAATGCCGAGACCGATCTC	TGCAGCWGARYAAATGTTTGCTGCATGAGATCGGAAGAGCGGTTCAGCAGGAATGCCGAGACCGATCTC	3	2		9	0.500000	0.750000	0.250000	0.750000	0.250000	0.000000	0.375000	0.375000	0.375000	4.600.000	2.175.000	211.494	-0.250000	-0.19374	3	0.00047	1.000.000	1.000.000	1.000.000	1.000.000	1.000.000	1.000.000	1.000.000	-	1	-	1	-	1	-	1	1	-	1	0	0
100213019|F|0-9:G>A-9:G>A	100213019	40302	TGCAGCTGAATAAATGTTTGCTGCATGAGATCGGAAGAGCGGTTCAGCAGGAATGCCGAGACCGATCTC	TGCAGCWGARYAAATGTTTGCTGCATGAGATCGGAAGAGCGGTTCAGCAGGAATGCCGAGACCGATCTC	3	2	9:G>A	9	0.500000	0.750000	0.250000	0.750000	0.250000	0.000000	0.375000	0.375000	0.375000	4.600.000	2.175.000	211.494	-0.250000	-0.19374	3	0.00047	1.000.000	1.000.000	1.000.000	1.000.000	1.000.000	1.000.000	1.000.000	-	0	-	0	-	0	-	0	0	-	0	1	1
100213021|F|0--5:A>C	100213021	40303	TGCAGATGCAAATTCAAAAGCATGAGATCGGAAGAGCGGTTCAGCAGGAATGCCGAGACCGATCTCGTA	TGCAGMWGMARATTMAAMAGCATGAGATCGGAAGAGCGGTTCAGCAGGAATGCCGAGACCGATCTCGTA	3	6		5	0.625000	0.200000	0.800000	0.200000	0.800000	0.000000	0.320000	0.320000	0.320000	8.600.000	4.540.000	189.427	-0.200000	-0.30527	3	-0.04256	1.000.000	1.000.000	1.000.000	1.000.000	1.000.000	2.000.000	2.000.000	-	0	-	0	1	0	1	0	0	-	0	0	0
100213021|F|0-5:A>C-5:A>C	100213021	40303	TGCAGCAGAAGATTAAACAGCATGAGATCGGAAGAGCGGTTCAGCAGGAATGCCGAGACCGATCTCGTA	TGCAGMWGMARATTMAAMAGCATGAGATCGGAAGAGCGGTTCAGCAGGAATGCCGAGACCGATCTCGTA	3	6	5:A>C	5	0.625000	0.200000	0.800000	0.200000	0.800000	0.000000	0.320000	0.320000	0.320000	8.600.000	4.540.000	189.427	-0.200000	-0.30527	3	-0.04256	1.000.000	1.000.000	1.000.000	1.000.000	1.000.000	2.000.000	2.000.000	-	1	-	1	0	1	0	1	1	-	1	1	1
100213024|F|0--13:C>G	100213024	40304	TGCAGCTGCGGCGCTTGCATGGCTCTGGCGCGCGACTGATGCATGAGATCGGAAGAGCGGTTCAGCAGG	TGCAGCTGCGGCGSTTGCATGGCTCTRSCGCGCGACTGATGCATGAGATCGGAAGAGCGGTTCAGCAGG	3	2		13	0.562500	0.666667	0.333333	0.666667	0.333333	0.000000	0.444444	0.444444	0.444444	4.216.667	3.140.000	134.289	-0.333333	-0.23369	3	-0.04344	1.000.000	1.000.000	1.000.000	1.000.000	1.000.000	2.000.000	2.000.000	-	1	-	1	-	1	-	1	1	0	1	0	0
100213024|F|0-13:C>G-13:C>G	100213024	40304	TGCAGCTGCGGCGGTTGCATGGCTCTAGCGCGCGACTGATGCATGAGATCGGAAGAGCGGTTCAGCAGG	TGCAGCTGCGGCGSTTGCATGGCTCTRSCGCGCGACTGATGCATGAGATCGGAAGAGCGGTTCAGCAGG	3	2	13:C>G	13	0.562500	0.666667	0.333333	0.666667	0.333333	0.000000	0.444444	0.444444	0.444444	4.216.667	3.140.000	134.289	-0.333333	-0.23369	3	-0.04344	1.000.000	1.000.000	1.000.000	1.000.000	1.000.000	2.000.000	2.000.000	-	0	-	0	-	0	-	0	0	1	0	1	1
100213024|F|0--27:G>C	100213024	40304	TGCAGCTGCGGCGCTTGCATGGCTCTGGCGCGCGACTGATGCATGAGATCGGAAGAGCGGTTCAGCAGG	TGCAGCTGCGGCGSTTGCATGGCTCTRSCGCGCGACTGATGCATGAGATCGGAAGAGCGGTTCAGCAGG	3	1		27	0.562500	0.777778	0.222222	0.777778	0.222222	0.000000	0.345679	0.345679	0.345679	4.200.000	2.925.000	143.590	-0.222222	-0.21962	3	-0.04817	1.000.000	1.000.000	1.000.000	1.000.000	1.000.000	2.000.000	2.000.000	-	1	-	1	-	0	-	0	1	1	1	1	1
100213024|F|0-27:G>C-27:G>C	100213024	40304	TGCAGCTGCGGCGCTTGCATGGCTCTGCCGCGCGACTGATGCATGAGATCGGAAGAGCGGTTCAGCAGG	TGCAGCTGCGGCGSTTGCATGGCTCTRSCGCGCGACTGATGCATGAGATCGGAAGAGCGGTTCAGCAGG	3	1	27:G>C	27	0.562500	0.777778	0.222222	0.777778	0.222222	0.000000	0.345679	0.345679	0.345679	4.200.000	2.925.000	143.590	-0.222222	-0.21962	3	-0.04817	1.000.000	1.000.000	1.000.000	1.000.000	1.000.000	2.000.000	2.000.000	-	0	-	0	-	1	-	1	0	0	0	0	0
100213026|F|0--7:A>G	100213026	40305	TGCAGCTACGTCAAGAGGTAGTGGTGTGCATGAGATCGGAAGAGCGGTTCAGCAGGAATGCCGAGACCG	TGCAGCTRCGTCARGAGGTRGTGGTGTGCMTGAGATCGGAAGAGCGGTTCAGCAGGAATGCCGAGACCG	3	3		7	0.562500	0.666667	0.333333	0.666667	0.333333	0.000000	0.444444	0.444444	0.444444	7.591.667	3.900.000	194.658	-0.333333	-0.22464	3	-0.00001	1.000.000	1.000.000	1.000.000	1.000.000	1.000.000	1.000.000	1.000.000	-	1	-	1	-	1	-	1	1	0	1	0	0
100213026|F|0-7:A>G-7:A>G	100213026	40305	TGCAGCTGCGTCAGGAGGTGGTGGTGTGCATGAGATCGGAAGAGCGGTTCAGCAGGAATGCCGAGACCG	TGCAGCTRCGTCARGAGGTRGTGGTGTGCMTGAGATCGGAAGAGCGGTTCAGCAGGAATGCCGAGACCG	3	3	7:A>G	7	0.562500	0.666667	0.333333	0.666667	0.333333	0.000000	0.444444	0.444444	0.444444	7.591.667	3.900.000	194.658	-0.333333	-0.22464	3	-0.00001	1.000.000	1.000.000	1.000.000	1.000.000	1.000.000	1.000.000	1.000.000	-	0	-	0	-	0	-	0	0	1	0	1	1
100213028|F|0--12:A>T	100213028	40306	TGCAGCTGTATCACCCGCCTGCGCACTGCATGAGATCGGAAGAGCGGTTCAGCAGGAATGCCGAGACCG	TGCAGCTGTATCDYCCGCCTGCGCACTGCATGAGATCGGAAGAGCGGTTCAGCAGGAATGCCGAGACCG	3	1		12	0.750000	0.333333	0.666667	0.333333	0.666667	0.000000	0.444444	0.444444	0.444444	6.550.000	3.113.333	210.385	-0.333333	-0.43860	2	0.00000	1.000.000	1.000.000	1.000.000	1.000.000	1.000.000	4.000.000	4.000.000	1	0	1	0	1	0	1	0	0	-	0	0	0
100213028|F|0-12:A>T-12:A>T	100213028	40306	TGCAGCTGTATCTCCCGCCTGCGCACTGCATGAGATCGGAAGAGCGGTTCAGCAGGAATGCCGAGACCG	TGCAGCTGTATCDYCCGCCTGCGCACTGCATGAGATCGGAAGAGCGGTTCAGCAGGAATGCCGAGACCG	3	1	12:A>T	12	0.750000	0.333333	0.666667	0.333333	0.666667	0.000000	0.444444	0.444444	0.444444	6.550.000	3.113.333	210.385	-0.333333	-0.43860	2	0.00000	1.000.000	1.000.000	1.000.000	1.000.000	1.000.000	4.000.000	4.000.000	0	1	0	1	0	1	0	1	1	-	1	1	1
100213029|F|0--13:T>C	100213029	40306	TGCAGCTGTATCGTCCGCCTGCGCACTGCATGAGATCGGAAGAGCGGTTCAGCAGGAATGCCGAGACCG	TGCAGCTGTATCDYCCGCCTGCGCACTGCATGAGATCGGAAGAGCGGTTCAGCAGGAATGCCGAGACCG	3	2		13	0.875000	0.142857	0.857143	0.142857	0.857143	0.000000	0.244898	0.244898	0.244898	8.750.000	4.308.696	203.078	-0.142857	-0.43733	3	-0.13669	1.000.000	1.000.000	1.000.000	1.000.000	1.000.000	2.000.000	2.000.000	0	0	0	0	0	0	0	0	0	-	0	0	0
100213029|F|0-13:T>C-13:T>C	100213029	40306	TGCAGCTGTATCTCCCGCCTGCGCACTGCATGAGATCGGAAGAGCGGTTCAGCAGGAATGCCGAGACCG	TGCAGCTGTATCDYCCGCCTGCGCACTGCATGAGATCGGAAGAGCGGTTCAGCAGGAATGCCGAGACCG	3	2	13:T>C	13	0.875000	0.142857	0.857143	0.142857	0.857143	0.000000	0.244898	0.244898	0.244898	8.750.000	4.308.696	203.078	-0.142857	-0.43733	3	-0.13669	1.000.000	1.000.000	1.000.000	1.000.000	1.000.000	2.000.000	2.000.000	1	1	1	1	1	1	1	1	1	-	1	1	1
100213030|F|0--20:G>C	100213030	40307	TGCAGCTGTGTGTTCAAACGGCTTGGGAGCCTGCATGAGATCGGAAGAGCGGTTCAGCAGGAATGCCGA	TGCAGCTGTGTGTTCAAACGSCTYGGVAGCCTGCATGAGATCGGAAGAGCGGTTCAGCAGGAATGCCGA	3	3		20	0.562500	0.333333	0.666667	0.333333	0.666667	0.000000	0.444444	0.444444	0.444444	4.020.000	3.933.333	102.203	-0.333333	-0.23477	3	-0.05489	1.000.000	1.000.000	1.000.000	1.000.000	1.000.000	1.000.000	1.000.000	-	0	-	0	-	0	-	0	0	1	0	1	1
100213030|F|0-20:G>C-20:G>C	100213030	40307	TGCAGCTGTGTGTTCAAACGCCTCGGCAGCCTGCATGAGATCGGAAGAGCGGTTCAGCAGGAATGCCGA	TGCAGCTGTGTGTTCAAACGSCTYGGVAGCCTGCATGAGATCGGAAGAGCGGTTCAGCAGGAATGCCGA	3	3	20:G>C	20	0.562500	0.333333	0.666667	0.333333	0.666667	0.000000	0.444444	0.444444	0.444444	4.020.000	3.933.333	102.203	-0.333333	-0.23477	3	-0.05489	1.000.000	1.000.000	1.000.000	1.000.000	1.000.000	1.000.000	1.000.000	-	1	-	1	-	1	-	1	1	0	1	0	0
100213033|F|0--6:T>C	100213033	40308	TGCAGCTTAACAGTTTGAATGGCTTCACCCACAATGCAGCTGGCAGCTCATTTGCATGAGATCGGAAGA	TGCAGCYTAACAGTTTGAATGGYTTCACCCACAATGCAGMTGGCASYTCATTTGCATGAGATCGGAAGA	3	3		6	0.562500	0.333333	0.666667	0.333333	0.666667	0.000000	0.444444	0.444444	0.444444	1.700.000	1.509.091	112.651	-0.333333	-0.21785	3	-0.09079	1.000.000	1.000.000	1.000.000	1.000.000	1.000.000	1.000.000	1.000.000	-	0	-	0	-	0	-	0	0	1	0	1	1
100213033|F|0-6:T>C-6:T>C	100213033	40308	TGCAGCCTAACAGTTTGAATGGCTTCACCCACAATGCAGATGGCAGTTCATTTGCATGAGATCGGAAGA	TGCAGCYTAACAGTTTGAATGGYTTCACCCACAATGCAGMTGGCASYTCATTTGCATGAGATCGGAAGA	3	3	6:T>C	6	0.562500	0.333333	0.666667	0.333333	0.666667	0.000000	0.444444	0.444444	0.444444	1.700.000	1.509.091	112.651	-0.333333	-0.21785	3	-0.09079	1.000.000	1.000.000	1.000.000	1.000.000	1.000.000	1.000.000	1.000.000	-	1	-	1	-	1	-	1	1	0	1	0	0
100213040|F|0--23:A>G	100213040	40311	TGCAGCTTCTGAGCCCTGTTGTTAGGGCAATCCTTCCCCTGCATGAGATCGGAAGAGCGGTTCAGCAGG	TGCAGCTTCTGAGCCCTGTTGTTRGGRCARTCYTTCCCCTGCATGAGATCGGAAGAGCGGTTCAGCAGG	3	3		23	0.562500	0.222222	0.777778	0.222222	0.777778	0.000000	0.345679	0.345679	0.345679	7.433.333	7.228.571	102.833	-0.222222	-0.19721	3	-0.01380	1.000.000	1.000.000	1.000.000	1.000.000	1.000.000	0.000000	0.000000	-	0	-	0	-	0	-	0	0	0	0	1	1
100213040|F|0-23:A>G-23:A>G	100213040	40311	TGCAGCTTCTGAGCCCTGTTGTTGGGACAGTCCTTCCCCTGCATGAGATCGGAAGAGCGGTTCAGCAGG	TGCAGCTTCTGAGCCCTGTTGTTRGGRCARTCYTTCCCCTGCATGAGATCGGAAGAGCGGTTCAGCAGG	3	3	23:A>G	23	0.562500	0.222222	0.777778	0.222222	0.777778	0.000000	0.345679	0.345679	0.345679	7.433.333	7.228.571	102.833	-0.222222	-0.19721	3	-0.01380	1.000.000	1.000.000	1.000.000	1.000.000	1.000.000	0.000000	0.000000	-	1	-	1	-	1	-	1	1	1	1	0	0
100213041|F|0--32:C>T	100213041	40311	TGCAGCTTCTGAGCCCTGTTGTTGGGACAGTCCTTCCCCTGCATGAGATCGGAAGAGCGGTTCAGCAGG	TGCAGCTTCTGAGCCCTGTTGTTRGGRCARTCYTTCCCCTGCATGAGATCGGAAGAGCGGTTCAGCAGG	3	2		32	0.562500	0.888889	0.111111	0.888889	0.111111	0.000000	0.197531	0.197531	0.197531	7.786.667	3.350.000	232.438	-0.111111	-0.16078	3	-0.01999	1.000.000	1.000.000	1.000.000	1.000.000	1.000.000	1.000.000	1.000.000	-	1	-	1	-	1	-	1	1	0	1	1	1
100213041|F|0-32:C>T-32:C>T	100213041	40311	TGCAGCTTCTGAGCCCTGTTGTTGGGGCAGTCTTTCCCCTGCATGAGATCGGAAGAGCGGTTCAGCAGG	TGCAGCTTCTGAGCCCTGTTGTTRGGRCARTCYTTCCCCTGCATGAGATCGGAAGAGCGGTTCAGCAGG	3	2	32:C>T	32	0.562500	0.888889	0.111111	0.888889	0.111111	0.000000	0.197531	0.197531	0.197531	7.786.667	3.350.000	232.438	-0.111111	-0.16078	3	-0.01999	1.000.000	1.000.000	1.000.000	1.000.000	1.000.000	1.000.000	1.000.000	-	0	-	0	-	0	-	0	0	1	0	0	0
100213058|F|0--5:C>G	100213058	40321	TGCAGCACCAGGATGGTGCTCTGCATGAGATCGGAAGAGCGGTTCAGCAGGAATGCCGAGACCGATCTC	TGCAGVACCAGGATGGTGCTCTGCATGAGATCGGAAGAGCGGTTCAGCAGGAATGCCGAGACCGATCTC	3	1		5	0.625000	0.600000	0.400000	0.600000	0.400000	0.000000	0.480000	0.480000	0.480000	4.508.333	4.142.857	108.822	-0.400000	-0.32167	2	0.00000	1.000.000	1.000.000	1.000.000	1.000.000	1.000.000	3.000.000	3.000.000	0	1	0	1	-	1	-	1	1	-	1	0	0
100213058|F|0-5:C>G-5:C>G	100213058	40321	TGCAGGACCAGGATGGTGCTCTGCATGAGATCGGAAGAGCGGTTCAGCAGGAATGCCGAGACCGATCTC	TGCAGVACCAGGATGGTGCTCTGCATGAGATCGGAAGAGCGGTTCAGCAGGAATGCCGAGACCGATCTC	3	1	5:C>G	5	0.625000	0.600000	0.400000	0.600000	0.400000	0.000000	0.480000	0.480000	0.480000	4.508.333	4.142.857	108.822	-0.400000	-0.32167	2	0.00000	1.000.000	1.000.000	1.000.000	1.000.000	1.000.000	3.000.000	3.000.000	1	0	1	0	-	0	-	0	0	-	0	1	1
100213059|F|0--23:A>G	100213059	40322	TGCAGGACCCCTCTCACCCTTGGAGCCAACAATCCCAGGCATGAGATCGGAAGAGCGGTTCAGCAGGAA	TGCAGGACCCCTCTCACCCTTGGRGCCARYAATSCCAGGCATGAGATCGGAAGAGCGGTTCAGCAGGAA	3	2		23	0.500000	0.750000	0.250000	0.750000	0.250000	0.000000	0.375000	0.375000	0.375000	2.483.333	1.950.000	127.350	-0.250000	-0.14816	3	-0.02403	1.000.000	1.000.000	1.000.000	1.000.000	1.000.000	0.000000	0.000000	-	1	-	1	-	1	-	1	1	-	1	0	0
100213059|F|0-23:A>G-23:A>G	100213059	40322	TGCAGGACCCCTCTCACCCTTGGGGCCAACAATGCCAGGCATGAGATCGGAAGAGCGGTTCAGCAGGAA	TGCAGGACCCCTCTCACCCTTGGRGCCARYAATSCCAGGCATGAGATCGGAAGAGCGGTTCAGCAGGAA	3	2	23:A>G	23	0.500000	0.750000	0.250000	0.750000	0.250000	0.000000	0.375000	0.375000	0.375000	2.483.333	1.950.000	127.350	-0.250000	-0.14816	3	-0.02403	1.000.000	1.000.000	1.000.000	1.000.000	1.000.000	0.000000	0.000000	-	0	-	0	-	0	-	0	0	-	0	1	1
100213059|F|0--28:A>G	100213059	40322	TGCAGGACCCCTCTCACCCTTGGAGCCAACAATCCCAGGCATGAGATCGGAAGAGCGGTTCAGCAGGAA	TGCAGGACCCCTCTCACCCTTGGRGCCARYAATSCCAGGCATGAGATCGGAAGAGCGGTTCAGCAGGAA	3	3		28	0.500000	0.750000	0.250000	0.750000	0.250000	0.000000	0.375000	0.375000	0.375000	2.840.000	1.325.000	214.340	-0.250000	-0.18970	3	-0.01962	1.000.000	1.000.000	1.000.000	1.000.000	1.000.000	2.000.000	2.000.000	-	1	-	1	-	0	-	0	1	-	1	1	1
100213059|F|0-28:A>G-28:A>G	100213059	40322	TGCAGGACCCCTCTCACCCTTGGAGCCAGTAATGCCAGGCATGAGATCGGAAGAGCGGTTCAGCAGGAA	TGCAGGACCCCTCTCACCCTTGGRGCCARYAATSCCAGGCATGAGATCGGAAGAGCGGTTCAGCAGGAA	3	3	28:A>G	28	0.500000	0.750000	0.250000	0.750000	0.250000	0.000000	0.375000	0.375000	0.375000	2.840.000	1.325.000	214.340	-0.250000	-0.18970	3	-0.01962	1.000.000	1.000.000	1.000.000	1.000.000	1.000.000	2.000.000	2.000.000	-	0	-	0	-	1	-	1	0	-	0	0	0
100213071|F|0--6:A>G	100213071	40329	TGCAGGACTGCTGTTCATTGTCTAAAGGAGCATGAGATCGGAAGAGCGGTTCAGCAGGAATGCCGAGAC	TGCAGGRCTGCTGTKCATTGTCTAAAGRMGCATGAGATCGGAAGAGCGGTTCAGCAGGAATGCCGAGAC	3	3		6	0.562500	0.888889	0.111111	0.888889	0.111111	0.000000	0.197531	0.197531	0.197531	5.781.250	3.650.000	158.390	-0.111111	-0.16288	3	-0.00006	1.000.000	1.000.000	1.000.000	1.000.000	1.000.000	1.000.000	1.000.000	-	1	-	1	-	1	-	1	1	0	1	1	1
100213071|F|0-6:A>G-6:A>G	100213071	40329	TGCAGGGCTGCTGTGCATTGTCTAAAGAAGCATGAGATCGGAAGAGCGGTTCAGCAGGAATGCCGAGAC	TGCAGGRCTGCTGTKCATTGTCTAAAGRMGCATGAGATCGGAAGAGCGGTTCAGCAGGAATGCCGAGAC	3	3	6:A>G	6	0.562500	0.888889	0.111111	0.888889	0.111111	0.000000	0.197531	0.197531	0.197531	5.781.250	3.650.000	158.390	-0.111111	-0.16288	3	-0.00006	1.000.000	1.000.000	1.000.000	1.000.000	1.000.000	1.000.000	1.000.000	-	0	-	0	-	0	-	0	0	1	0	0	0
100213088|F|0--40:A>G	100213088	40337	TGCAGGAGGCGCTGATCCACCTGGGGGCCAAGTTTTCTCCATGCATGAGATCGGAAGAGCGGTTCAGCA	TGCAGGMGGCGCTGATCCACCTGGGGGCCAAGTTTTCTCCRTGCATGAGATCGGAAGAGCGGTTCAGCA	3	1		40	0.500000	0.750000	0.250000	0.750000	0.250000	0.000000	0.375000	0.375000	0.375000	4.758.333	1.466.667	324.432	-0.250000	-0.17303	3	-0.00013	1.000.000	1.000.000	1.000.000	1.000.000	1.000.000	1.000.000	1.000.000	-	1	-	1	-	1	-	1	1	-	1	0	0
100213088|F|0-40:A>G-40:A>G	100213088	40337	TGCAGGAGGCGCTGATCCACCTGGGGGCCAAGTTTTCTCCGTGCATGAGATCGGAAGAGCGGTTCAGCA	TGCAGGMGGCGCTGATCCACCTGGGGGCCAAGTTTTCTCCRTGCATGAGATCGGAAGAGCGGTTCAGCA	3	1	40:A>G	40	0.500000	0.750000	0.250000	0.750000	0.250000	0.000000	0.375000	0.375000	0.375000	4.758.333	1.466.667	324.432	-0.250000	-0.17303	3	-0.00013	1.000.000	1.000.000	1.000.000	1.000.000	1.000.000	1.000.000	1.000.000	-	0	-	0	-	0	-	0	0	-	0	1	1
100213104|F|0--7:C>T	100213104	40346	TGCAGGACGTGTGCCTGGACCTGCTGCATGAGATCGGAAGAGCGGTTCAGCAGGAATGCCGAGACCGAT	TGCAGGMYGTGTGCCTGGACCTGCTGCATGAGATCGGAAGAGCGGTTCAGCAGGAATGCCGAGACCGAT	3	1		7	0.562500	0.777778	0.222222	0.777778	0.222222	0.000000	0.345679	0.345679	0.345679	6.542.857	1.933.333	338.424	-0.222222	-0.16445	3	0.00073	1.000.000	1.000.000	1.000.000	1.000.000	1.000.000	1.000.000	1.000.000	-	1	-	1	-	1	-	1	1	1	1	0	0
100213104|F|0-7:C>T-7:C>T	100213104	40346	TGCAGGATGTGTGCCTGGACCTGCTGCATGAGATCGGAAGAGCGGTTCAGCAGGAATGCCGAGACCGAT	TGCAGGMYGTGTGCCTGGACCTGCTGCATGAGATCGGAAGAGCGGTTCAGCAGGAATGCCGAGACCGAT	3	1	7:C>T	7	0.562500	0.777778	0.222222	0.777778	0.222222	0.000000	0.345679	0.345679	0.345679	6.542.857	1.933.333	338.424	-0.222222	-0.16445	3	0.00073	1.000.000	1.000.000	1.000.000	1.000.000	1.000.000	1.000.000	1.000.000	-	0	-	0	-	0	-	0	0	0	0	1	1
100213114|F|0--9:T>A	100213114	40351	TGCAGGCCCTAACTCATGCAGGCATGAGATCGGAAGAGCGGTTCAGCAGGAATGCCGAGACCGATCTCG	TGCAGGMCCWAACTCATGCAGGCATGAGATCGGAAGAGCGGTTCAGCAGGAATGCCGAGACCGATCTCG	3	1		9	0.500000	0.750000	0.250000	0.750000	0.250000	0.000000	0.375000	0.375000	0.375000	5.466.667	1.975.000	276.793	-0.250000	-0.17966	3	-0.00474	1.000.000	1.000.000	1.000.000	1.000.000	1.000.000	1.000.000	1.000.000	-	1	-	1	-	1	-	1	1	-	1	0	0
100213114|F|0-9:T>A-9:T>A	100213114	40351	TGCAGGCCCAAACTCATGCAGGCATGAGATCGGAAGAGCGGTTCAGCAGGAATGCCGAGACCGATCTCG	TGCAGGMCCWAACTCATGCAGGCATGAGATCGGAAGAGCGGTTCAGCAGGAATGCCGAGACCGATCTCG	3	1	9:T>A	9	0.500000	0.750000	0.250000	0.750000	0.250000	0.000000	0.375000	0.375000	0.375000	5.466.667	1.975.000	276.793	-0.250000	-0.17966	3	-0.00474	1.000.000	1.000.000	1.000.000	1.000.000	1.000.000	1.000.000	1.000.000	-	0	-	0	-	0	-	0	0	-	0	1	1
100213129|F|0--25:A>G	100213129	40359	TGCAGGCGTGCACCTGCGGCATGACAGCAAAAACAATATTTGGTGCATGAGATCGGAAGAGCGGTTCAG	TGCAGGCGTGCACCTGCGGCATGACRGCAMAAACAATATTTGGTGCATGAGATCGGAAGAGCGGTTCAG	3	2		25	0.562500	0.777778	0.222222	0.777778	0.222222	0.000000	0.345679	0.345679	0.345679	3.478.571	1.975.000	176.130	-0.222222	-0.19862	3	-0.01418	1.000.000	1.000.000	1.000.000	1.000.000	1.000.000	1.000.000	1.000.000	-	1	-	1	-	1	-	1	1	1	1	0	0
100213129|F|0-25:A>G-25:A>G	100213129	40359	TGCAGGCGTGCACCTGCGGCATGACGGCACAAACAATATTTGGTGCATGAGATCGGAAGAGCGGTTCAG	TGCAGGCGTGCACCTGCGGCATGACRGCAMAAACAATATTTGGTGCATGAGATCGGAAGAGCGGTTCAG	3	2	25:A>G	25	0.562500	0.777778	0.222222	0.777778	0.222222	0.000000	0.345679	0.345679	0.345679	3.478.571	1.975.000	176.130	-0.222222	-0.19862	3	-0.01418	1.000.000	1.000.000	1.000.000	1.000.000	1.000.000	1.000.000	1.000.000	-	0	-	0	-	0	-	0	0	0	0	1	1
100213129|F|0--29:A>C	100213129	40359	TGCAGGCGTGCACCTGCGGCATGACAGCAAAAACAATATTTGGTGCATGAGATCGGAAGAGCGGTTCAG	TGCAGGCGTGCACCTGCGGCATGACRGCAMAAACAATATTTGGTGCATGAGATCGGAAGAGCGGTTCAG	3	1		29	0.562500	0.666667	0.333333	0.666667	0.333333	0.000000	0.444444	0.444444	0.444444	3.450.000	2.533.333	136.184	-0.333333	-0.22936	3	-0.09150	1.000.000	1.000.000	1.000.000	1.000.000	1.000.000	2.000.000	2.000.000	-	1	-	1	-	1	-	1	1	0	1	0	0
100213129|F|0-29:A>C-29:A>C	100213129	40359	TGCAGGCGTGCACCTGCGGCATGACAGCACAAACAATATTTGGTGCATGAGATCGGAAGAGCGGTTCAG	TGCAGGCGTGCACCTGCGGCATGACRGCAMAAACAATATTTGGTGCATGAGATCGGAAGAGCGGTTCAG	3	1	29:A>C	29	0.562500	0.666667	0.333333	0.666667	0.333333	0.000000	0.444444	0.444444	0.444444	3.450.000	2.533.333	136.184	-0.333333	-0.22936	3	-0.09150	1.000.000	1.000.000	1.000.000	1.000.000	1.000.000	2.000.000	2.000.000	-	0	-	0	-	0	-	0	0	1	0	1	1
100213131|F|0--8:G>A	100213131	40360	TGCAGGCTGAGGACAGCACACAGCATGAGATCGGAAGAGCGGTTCAGCAGGAATGCCGAGACCGATCTC	TGCAGGCTRAGGACRGCRCACAGCATGAGATCGGAAGAGCGGTTCAGCAGGAATGCCGAGACCGATCTC	3	3		8	0.437500	0.571429	0.428571	0.571429	0.428571	0.000000	0.489796	0.489796	0.489796	12.525.000	3.380.000	370.562	-0.428571	-0.13988	2	0.00000	1.000.000	1.000.000	1.000.000	1.000.000	1.000.000	2.000.000	2.000.000	1	-	1	-	1	-	1	0	-	-	-	0	0
100213131|F|0-8:G>A-8:G>A	100213131	40360	TGCAGGCTAAGGACGGCGCACAGCATGAGATCGGAAGAGCGGTTCAGCAGGAATGCCGAGACCGATCTC	TGCAGGCTRAGGACRGCRCACAGCATGAGATCGGAAGAGCGGTTCAGCAGGAATGCCGAGACCGATCTC	3	3	8:G>A	8	0.437500	0.571429	0.428571	0.571429	0.428571	0.000000	0.489796	0.489796	0.489796	12.525.000	3.380.000	370.562	-0.428571	-0.13988	2	0.00000	1.000.000	1.000.000	1.000.000	1.000.000	1.000.000	2.000.000	2.000.000	0	-	0	-	0	-	0	1	-	-	-	1	1
100213131|F|0--14:A>G	100213131	40360	TGCAGGCTGAGGACAGCACACAGCATGAGATCGGAAGAGCGGTTCAGCAGGAATGCCGAGACCGATCTC	TGCAGGCTRAGGACRGCRCACAGCATGAGATCGGAAGAGCGGTTCAGCAGGAATGCCGAGACCGATCTC	3	2		14	0.562500	0.444444	0.555556	0.444444	0.555556	0.000000	0.493827	0.493827	0.493827	12.525.000	7.444.444	168.246	-0.444444	-0.27131	3	-0.05034	1.000.000	1.000.000	1.000.000	1.000.000	1.000.000	4.000.000	4.000.000	1	-	1	-	1	-	1	0	-	-	-	0	0
100213131|F|0-14:A>G-14:A>G	100213131	40360	TGCAGGCTGAGGACGGCGCACAGCATGAGATCGGAAGAGCGGTTCAGCAGGAATGCCGAGACCGATCTC	TGCAGGCTRAGGACRGCRCACAGCATGAGATCGGAAGAGCGGTTCAGCAGGAATGCCGAGACCGATCTC	3	2	14:A>G	14	0.562500	0.444444	0.555556	0.444444	0.555556	0.000000	0.493827	0.493827	0.493827	12.525.000	7.444.444	168.246	-0.444444	-0.27131	3	-0.05034	1.000.000	1.000.000	1.000.000	1.000.000	1.000.000	4.000.000	4.000.000	0	-	0	-	0	-	0	1	-	-	-	1	1
100213135|F|0--7:C>T	100213135	40362	TGCAGGCCGTGCAGGCCCGCCTGCATGAGATCGGAAGAGCGGTTCAGCAGGAATGCCGAGACCGATCTC	TGCAGGCYGTRCARGCMCGYCTGCATGAGATCGGAAGAGCGGTTCAGCAGGAATGCCGAGACCGATCTC	3	4		7	0.437500	0.571429	0.428571	0.571429	0.428571	0.000000	0.489796	0.489796	0.489796	6.037.500	3.740.000	161.430	-0.428571	-0.19798	3	-0.06735	1.000.000	1.000.000	1.000.000	1.000.000	1.000.000	2.000.000	2.000.000	-	1	-	1	-	-	-	-	-	0	-	0	0
100213135|F|0-7:C>T-7:C>T	100213135	40362	TGCAGGCTGTACAAGCCCGTCTGCATGAGATCGGAAGAGCGGTTCAGCAGGAATGCCGAGACCGATCTC	TGCAGGCYGTRCARGCMCGYCTGCATGAGATCGGAAGAGCGGTTCAGCAGGAATGCCGAGACCGATCTC	3	4	7:C>T	7	0.437500	0.571429	0.428571	0.571429	0.428571	0.000000	0.489796	0.489796	0.489796	6.037.500	3.740.000	161.430	-0.428571	-0.19798	3	-0.06735	1.000.000	1.000.000	1.000.000	1.000.000	1.000.000	2.000.000	2.000.000	-	0	-	0	-	-	-	-	-	1	-	1	1
100213135|F|0--10:G>A	100213135	40362	TGCAGGCCGTGCAGGCCCGCCTGCATGAGATCGGAAGAGCGGTTCAGCAGGAATGCCGAGACCGATCTC	TGCAGGCYGTRCARGCMCGYCTGCATGAGATCGGAAGAGCGGTTCAGCAGGAATGCCGAGACCGATCTC	3	3		10	0.437500	0.285714	0.714286	0.285714	0.714286	0.000000	0.408163	0.408163	0.408163	5.350.000	5.066.667	105.592	-0.285714	-0.20975	3	-0.06302	1.000.000	1.000.000	1.000.000	1.000.000	1.000.000	2.000.000	2.000.000	-	0	-	0	-	-	-	-	-	0	-	0	0
100213135|F|0-10:G>A-10:G>A	100213135	40362	TGCAGGCCGTACAGGCACGTCTGCATGAGATCGGAAGAGCGGTTCAGCAGGAATGCCGAGACCGATCTC	TGCAGGCYGTRCARGCMCGYCTGCATGAGATCGGAAGAGCGGTTCAGCAGGAATGCCGAGACCGATCTC	3	3	10:G>A	10	0.437500	0.285714	0.714286	0.285714	0.714286	0.000000	0.408163	0.408163	0.408163	5.350.000	5.066.667	105.592	-0.285714	-0.20975	3	-0.06302	1.000.000	1.000.000	1.000.000	1.000.000	1.000.000	2.000.000	2.000.000	-	1	-	1	-	-	-	-	-	1	-	1	1
100213141|F|0--8:C>T	100213141	40364	TGCAGGGACACAGATGTGTGAACGATTAGCATGAGATCGGAAGAGCGGTTCAGCAGGAATGCCGAGACC	TGCAGGGAYACAGMTGTGTGMAYGATTAGCATGAGATCGGAAGAGCGGTTCAGCAGGAATGCCGAGACC	3	4		8	0.500000	0.750000	0.250000	0.750000	0.250000	0.000000	0.375000	0.375000	0.375000	6.716.667	3.766.667	178.319	-0.250000	-0.17797	2	0.00000	1.000.000	1.000.000	1.000.000	1.000.000	1.000.000	1.000.000	1.000.000	-	1	-	1	-	1	-	1	1	-	1	0	0
100213141|F|0-8:C>T-8:C>T	100213141	40364	TGCAGGGATACAGCTGTGTGCATGATTAGCATGAGATCGGAAGAGCGGTTCAGCAGGAATGCCGAGACC	TGCAGGGAYACAGMTGTGTGMAYGATTAGCATGAGATCGGAAGAGCGGTTCAGCAGGAATGCCGAGACC	3	4	8:C>T	8	0.500000	0.750000	0.250000	0.750000	0.250000	0.000000	0.375000	0.375000	0.375000	6.716.667	3.766.667	178.319	-0.250000	-0.17797	2	0.00000	1.000.000	1.000.000	1.000.000	1.000.000	1.000.000	1.000.000	1.000.000	-	0	-	0	-	0	-	0	0	-	0	1	1
100213143|F|0--7:C>A	100213143	40365	TGCAGGGCAGCCTCTTTGGCCTAGCAGGCATGAGATCGGAAGAGCGGTTCAGCAGGAATGCCGAGACCG	TGCAGGGMAGCCTYTTYGGCCTRGCAGGCATGAGATCGGAAGAGCGGTTCAGCAGGAATGCCGAGACCG	3	4		7	0.562500	0.888889	0.111111	0.888889	0.111111	0.000000	0.197531	0.197531	0.197531	5.886.667	3.350.000	175.721	-0.111111	-0.14891	3	-0.01400	1.000.000	1.000.000	1.000.000	1.000.000	1.000.000	1.000.000	1.000.000	-	1	-	1	-	1	-	1	1	0	1	1	1
100213143|F|0-7:C>A-7:C>A	100213143	40365	TGCAGGGAAGCCTTTTCGGCCTGGCAGGCATGAGATCGGAAGAGCGGTTCAGCAGGAATGCCGAGACCG	TGCAGGGMAGCCTYTTYGGCCTRGCAGGCATGAGATCGGAAGAGCGGTTCAGCAGGAATGCCGAGACCG	3	4	7:C>A	7	0.562500	0.888889	0.111111	0.888889	0.111111	0.000000	0.197531	0.197531	0.197531	5.886.667	3.350.000	175.721	-0.111111	-0.14891	3	-0.01400	1.000.000	1.000.000	1.000.000	1.000.000	1.000.000	1.000.000	1.000.000	-	0	-	0	-	0	-	0	0	1	0	0	0
100213145|F|0--7:A>C	100213145	40366	TGCAGGGACAGGGCGCCATTACGGAGAAGCTGCGGAGCTTCAGCATGAGATCGGAAGAGCGGTTCAGCA	TGCAGGGMCAGGGYGCCATYACGGAGAAGCTGMGGAGCTTCAGCATGAGATCGGAAGAGCGGTTCAGCA	3	3		7	0.500000	0.750000	0.250000	0.750000	0.250000	0.000000	0.375000	0.375000	0.375000	6.125.000	3.700.000	165.541	-0.250000	-0.17005	3	-0.03521	1.000.000	1.000.000	1.000.000	1.000.000	1.000.000	1.000.000	1.000.000	-	1	-	1	-	1	-	1	1	-	1	0	0
100213145|F|0-7:A>C-7:A>C	100213145	40366	TGCAGGGCCAGGGCGCCATCACGGAGAAGCTGAGGAGCTTCAGCATGAGATCGGAAGAGCGGTTCAGCA	TGCAGGGMCAGGGYGCCATYACGGAGAAGCTGMGGAGCTTCAGCATGAGATCGGAAGAGCGGTTCAGCA	3	3	7:A>C	7	0.500000	0.750000	0.250000	0.750000	0.250000	0.000000	0.375000	0.375000	0.375000	6.125.000	3.700.000	165.541	-0.250000	-0.17005	3	-0.03521	1.000.000	1.000.000	1.000.000	1.000.000	1.000.000	1.000.000	1.000.000	-	0	-	0	-	0	-	0	0	-	0	1	1
100213146|F|0--13:T>C	100213146	40366	TGCAGGGACAGGGTGCCATTACGGAGAAGCTGCGGAGCTTCAGCATGAGATCGGAAGAGCGGTTCAGCA	TGCAGGGMCAGGGYGCCATYACGGAGAAGCTGMGGAGCTTCAGCATGAGATCGGAAGAGCGGTTCAGCA	3	1		13	0.500000	0.250000	0.750000	0.250000	0.750000	0.000000	0.375000	0.375000	0.375000	9.500.000	4.236.364	224.249	-0.250000	-0.22460	3	-0.03633	1.000.000	1.000.000	1.000.000	1.000.000	1.000.000	2.000.000	2.000.000	-	0	-	0	-	0	-	0	1	-	1	0	0
100213146|F|0-13:T>C-13:T>C	100213146	40366	TGCAGGGACAGGGCGCCATTACGGAGAAGCTGCGGAGCTTCAGCATGAGATCGGAAGAGCGGTTCAGCA	TGCAGGGMCAGGGYGCCATYACGGAGAAGCTGMGGAGCTTCAGCATGAGATCGGAAGAGCGGTTCAGCA	3	1	13:T>C	13	0.500000	0.250000	0.750000	0.250000	0.750000	0.000000	0.375000	0.375000	0.375000	9.500.000	4.236.364	224.249	-0.250000	-0.22460	3	-0.03633	1.000.000	1.000.000	1.000.000	1.000.000	1.000.000	2.000.000	2.000.000	-	1	-	1	-	1	-	1	0	-	0	1	1
100213152|F|0--10:G>A	100213152	40369	TGCAGGGGGGGAAGGACTTCAGCATGAGATCGGAAGAGCGGTTCAGCAGGAATGCCGAGACCGATCTCG	TGCAGGGGGGDAAGGACTTCWGCATGAGATCGGAAGAGCGGTTCAGCAGGAATGCCGAGACCGATCTCG	3	2		10	0.437500	0.285714	0.714286	0.285714	0.714286	0.000000	0.408163	0.408163	0.408163	9.300.000	4.333.333	214.615	-0.285714	-0.20936	2	0.00000	1.000.000	1.000.000	1.000.000	1.000.000	1.000.000	2.000.000	2.000.000	-	-	-	-	1	-	1	-	0	0	0	0	0
100213152|F|0-10:G>A-10:G>A	100213152	40369	TGCAGGGGGGAAAGGACTTCTGCATGAGATCGGAAGAGCGGTTCAGCAGGAATGCCGAGACCGATCTCG	TGCAGGGGGGDAAGGACTTCWGCATGAGATCGGAAGAGCGGTTCAGCAGGAATGCCGAGACCGATCTCG	3	2	10:G>A	10	0.437500	0.285714	0.714286	0.285714	0.714286	0.000000	0.408163	0.408163	0.408163	9.300.000	4.333.333	214.615	-0.285714	-0.20936	2	0.00000	1.000.000	1.000.000	1.000.000	1.000.000	1.000.000	2.000.000	2.000.000	-	-	-	-	0	-	0	-	1	1	1	1	1
100213153|F|0--20:A>T	100213153	40369	TGCAGGGGGGTAAGGACTTCAGCATGAGATCGGAAGAGCGGTTCAGCAGGAATGCCGAGACCGATCTCG	TGCAGGGGGGDAAGGACTTCWGCATGAGATCGGAAGAGCGGTTCAGCAGGAATGCCGAGACCGATCTCG	3	2		20	0.562500	0.444444	0.555556	0.444444	0.555556	0.000000	0.493827	0.493827	0.493827	7.687.500	4.333.333	177.404	-0.444444	-0.30500	3	-0.10747	1.000.000	1.000.000	1.000.000	1.000.000	1.000.000	4.000.000	4.000.000	-	-	-	-	1	-	1	-	0	0	0	0	0
100213153|F|0-20:A>T-20:A>T	100213153	40369	TGCAGGGGGGAAAGGACTTCTGCATGAGATCGGAAGAGCGGTTCAGCAGGAATGCCGAGACCGATCTCG	TGCAGGGGGGDAAGGACTTCWGCATGAGATCGGAAGAGCGGTTCAGCAGGAATGCCGAGACCGATCTCG	3	2	20:A>T	20	0.562500	0.444444	0.555556	0.444444	0.555556	0.000000	0.493827	0.493827	0.493827	7.687.500	4.333.333	177.404	-0.444444	-0.30500	3	-0.10747	1.000.000	1.000.000	1.000.000	1.000.000	1.000.000	4.000.000	4.000.000	-	-	-	-	0	-	0	-	1	1	1	1	1
100213155|F|0--11:G>T	100213155	40370	TGCAGGGGTCTGAGATCATCCCAGCATGAGATCGGAAGAGCGGTTCAGCAGGAATGCCGAGACCGATCT	TGCAGGGGTCTKARMWYATCCCAGCATGAGATCGGAAGAGCGGTTCAGCAGGAATGCCGAGACCGATCT	3	3		11	0.562500	0.222222	0.777778	0.222222	0.777778	0.000000	0.345679	0.345679	0.345679	8.875.000	5.976.923	148.488	-0.222222	-0.26944	3	-0.05084	1.000.000	1.000.000	1.000.000	1.000.000	1.000.000	2.000.000	2.000.000	-	0	-	0	1	-	1	-	0	0	0	0	0
100213155|F|0-11:G>T-11:G>T	100213155	40370	TGCAGGGGTCTTAGCTTATCCCAGCATGAGATCGGAAGAGCGGTTCAGCAGGAATGCCGAGACCGATCT	TGCAGGGGTCTKARMWYATCCCAGCATGAGATCGGAAGAGCGGTTCAGCAGGAATGCCGAGACCGATCT	3	3	11:G>T	11	0.562500	0.222222	0.777778	0.222222	0.777778	0.000000	0.345679	0.345679	0.345679	8.875.000	5.976.923	148.488	-0.222222	-0.26944	3	-0.05084	1.000.000	1.000.000	1.000.000	1.000.000	1.000.000	2.000.000	2.000.000	-	1	-	1	0	-	0	-	1	1	1	1	1
100213156|F|0--13:G>A	100213156	40370	TGCAGGGGTCTTAGCTTATCCCAGCATGAGATCGGAAGAGCGGTTCAGCAGGAATGCCGAGACCGATCT	TGCAGGGGTCTKARMWYATCCCAGCATGAGATCGGAAGAGCGGTTCAGCAGGAATGCCGAGACCGATCT	3	2		13	0.562500	0.666667	0.333333	0.666667	0.333333	0.000000	0.444444	0.444444	0.444444	8.016.667	3.400.000	235.784	-0.333333	-0.24262	3	-0.06071	1.000.000	1.000.000	1.000.000	1.000.000	1.000.000	2.000.000	2.000.000	-	1	-	1	1	-	1	-	1	0	1	0	0
100213156|F|0-13:G>A-13:G>A	100213156	40370	TGCAGGGGTCTTAACATATCCCAGCATGAGATCGGAAGAGCGGTTCAGCAGGAATGCCGAGACCGATCT	TGCAGGGGTCTKARMWYATCCCAGCATGAGATCGGAAGAGCGGTTCAGCAGGAATGCCGAGACCGATCT	3	2	13:G>A	13	0.562500	0.666667	0.333333	0.666667	0.333333	0.000000	0.444444	0.444444	0.444444	8.016.667	3.400.000	235.784	-0.333333	-0.24262	3	-0.06071	1.000.000	1.000.000	1.000.000	1.000.000	1.000.000	2.000.000	2.000.000	-	0	-	0	0	-	0	-	0	1	0	1	1
100213162|F|0--15:T>G	100213162	40373	TGCAGATAGGCCACATGTACTGCATAGATCGGAAGAGCGGTTCAGCAGGAATGCCGAGACCGATCTCGT	TGCAGRTAGGCCACAKRTACTGCATAGATCGGAAGAGCGGTTCAGCAGGAATGCCGAGACCGATCTCGT	3	3		15	0.875000	0.142857	1.000.000	0.000000	0.857143	0.142857	0.244898	0.000000	0.122449	266.667	182.609	146.032	0.142857	0.03616	2	0.00000	0.888889	1.000.000	0.944444	0.500000	1.000.000	2.000.000	0.000000	0	0	0	0	1	0	1	-	0	0	0	0	0
100213162|F|0-15:T>G-15:T>G	100213162	40373	TGCAGGTAGGCCACAGATACTGCATAGATCGGAAGAGCGGTTCAGCAGGAATGCCGAGACCGATCTCGT	TGCAGRTAGGCCACAKRTACTGCATAGATCGGAAGAGCGGTTCAGCAGGAATGCCGAGACCGATCTCGT	3	3	15:T>G	15	0.875000	0.142857	1.000.000	0.000000	0.857143	0.142857	0.244898	0.000000	0.122449	266.667	182.609	146.032	0.142857	0.03616	2	0.00000	0.888889	1.000.000	0.944444	0.500000	1.000.000	2.000.000	0.000000	1	1	1	1	1	1	1	-	1	1	1	1	1
100213171|F|0--14:A>C	100213171	40377	TGCAGGTGTCCTGAACACGGCGCACGGTTTGCGCATGAGATCGGAAGAGCGGTTCAGCAGGAATGCCGA	TGCAGGTGTCCTGAMCAYGGBGCASGGTTTGCGCATGAGATCGGAAGAGCGGTTCAGCAGGAATGCCGA	3	3		14	0.562500	0.666667	0.333333	0.666667	0.333333	0.000000	0.444444	0.444444	0.444444	7.116.667	4.550.000	156.410	-0.333333	-0.23211	3	-0.04606	1.000.000	1.000.000	1.000.000	1.000.000	1.000.000	2.000.000	2.000.000	-	1	-	1	-	1	-	1	1	0	1	0	0
100213171|F|0-14:A>C-14:A>C	100213171	40377	TGCAGGTGTCCTGACCACGGTGCAGGGTTTGCGCATGAGATCGGAAGAGCGGTTCAGCAGGAATGCCGA	TGCAGGTGTCCTGAMCAYGGBGCASGGTTTGCGCATGAGATCGGAAGAGCGGTTCAGCAGGAATGCCGA	3	3	14:A>C	14	0.562500	0.666667	0.333333	0.666667	0.333333	0.000000	0.444444	0.444444	0.444444	7.116.667	4.550.000	156.410	-0.333333	-0.23211	3	-0.04606	1.000.000	1.000.000	1.000.000	1.000.000	1.000.000	2.000.000	2.000.000	-	0	-	0	-	0	-	0	0	1	0	1	1
100213176|F|0--13:A>T	100213176	40379	TGCAGGTGTTCTCATTCCCAGGGGATCTCCAGTTACGCATGAGATCGGAAGAGCGGTTCAGCAGGAATG	TGCAGGTGTTCTCWTTCCCAGGGGATCTCCARTTACGCATGAGATCGGAAGAGCGGTTCAGCAGGAATG	3	1		13	0.687500	0.181818	0.818182	0.181818	0.818182	0.000000	0.297521	0.297521	0.297521	6.950.000	3.594.444	193.354	-0.181818	-0.32707	3	-0.02145	1.000.000	1.000.000	1.000.000	1.000.000	1.000.000	2.000.000	2.000.000	1	0	1	0	-	0	-	0	0	0	0	0	0
100213176|F|0-13:A>T-13:A>T	100213176	40379	TGCAGGTGTTCTCTTTCCCAGGGGATCTCCAGTTACGCATGAGATCGGAAGAGCGGTTCAGCAGGAATG	TGCAGGTGTTCTCWTTCCCAGGGGATCTCCARTTACGCATGAGATCGGAAGAGCGGTTCAGCAGGAATG	3	1	13:A>T	13	0.687500	0.181818	0.818182	0.181818	0.818182	0.000000	0.297521	0.297521	0.297521	6.950.000	3.594.444	193.354	-0.181818	-0.32707	3	-0.02145	1.000.000	1.000.000	1.000.000	1.000.000	1.000.000	2.000.000	2.000.000	0	1	0	1	-	1	-	1	1	1	1	1	1
100213177|F|0--31:G>A	100213177	40379	TGCAGGTGTTCTCTTTCCCAGGGGATCTCCAGTTACGCATGAGATCGGAAGAGCGGTTCAGCAGGAATG	TGCAGGTGTTCTCWTTCCCAGGGGATCTCCARTTACGCATGAGATCGGAAGAGCGGTTCAGCAGGAATG	3	1		31	0.687500	0.909091	0.090909	0.909091	0.090909	0.000000	0.165289	0.165289	0.165289	4.310.000	3.150.000	136.825	-0.090909	-0.18934	3	-0.03787	1.000.000	1.000.000	1.000.000	1.000.000	1.000.000	1.000.000	1.000.000	1	1	1	1	-	1	-	1	1	0	1	1	1
100213177|F|0-31:G>A-31:G>A	100213177	40379	TGCAGGTGTTCTCTTTCCCAGGGGATCTCCAATTACGCATGAGATCGGAAGAGCGGTTCAGCAGGAATG	TGCAGGTGTTCTCWTTCCCAGGGGATCTCCARTTACGCATGAGATCGGAAGAGCGGTTCAGCAGGAATG	3	1	31:G>A	31	0.687500	0.909091	0.090909	0.909091	0.090909	0.000000	0.165289	0.165289	0.165289	4.310.000	3.150.000	136.825	-0.090909	-0.18934	3	-0.03787	1.000.000	1.000.000	1.000.000	1.000.000	1.000.000	1.000.000	1.000.000	0	0	0	0	-	0	-	0	0	1	0	0	0
100213187|F|0--11:G>T	100213187	40385	TGCAGTACCCTGCTCAGCAGGTGCAGCCTGACCGCATGAGATCGGAAGAGCGGTTCAGCAGGAATGCCG	TGCAGTACCCTKCYCAGCAGGTGCAGCCTGACCGCATGAGATCGGAAGAGCGGTTCAGCAGGAATGCCG	3	1		11	0.687500	0.363636	0.636364	0.363636	0.636364	0.000000	0.462810	0.462810	0.462810	4.612.500	3.683.333	125.226	-0.363636	-0.35421	3	-0.07711	1.000.000	1.000.000	1.000.000	1.000.000	1.000.000	4.000.000	4.000.000	1	0	1	0	-	0	-	0	1	0	1	0	0
100213187|F|0-11:G>T-11:G>T	100213187	40385	TGCAGTACCCTTCTCAGCAGGTGCAGCCTGACCGCATGAGATCGGAAGAGCGGTTCAGCAGGAATGCCG	TGCAGTACCCTKCYCAGCAGGTGCAGCCTGACCGCATGAGATCGGAAGAGCGGTTCAGCAGGAATGCCG	3	1	11:G>T	11	0.687500	0.363636	0.636364	0.363636	0.636364	0.000000	0.462810	0.462810	0.462810	4.612.500	3.683.333	125.226	-0.363636	-0.35421	3	-0.07711	1.000.000	1.000.000	1.000.000	1.000.000	1.000.000	4.000.000	4.000.000	0	1	0	1	-	1	-	1	0	1	0	1	1
100213188|F|0--13:T>C	100213188	40385	TGCAGTACCCTTCTCAGCAGGTGCAGCCTGACCGCATGAGATCGGAAGAGCGGTTCAGCAGGAATGCCG	TGCAGTACCCTKCYCAGCAGGTGCAGCCTGACCGCATGAGATCGGAAGAGCGGTTCAGCAGGAATGCCG	3	1		13	0.687500	0.727273	0.272727	0.727273	0.272727	0.000000	0.396694	0.396694	0.396694	4.412.500	2.650.000	166.509	-0.272727	-0.29525	3	-0.12722	1.000.000	1.000.000	1.000.000	1.000.000	1.000.000	1.000.000	1.000.000	1	1	1	1	-	1	-	1	1	0	1	0	0
100213188|F|0-13:T>C-13:T>C	100213188	40385	TGCAGTACCCTTCCCAGCAGGTGCAGCCTGACCGCATGAGATCGGAAGAGCGGTTCAGCAGGAATGCCG	TGCAGTACCCTKCYCAGCAGGTGCAGCCTGACCGCATGAGATCGGAAGAGCGGTTCAGCAGGAATGCCG	3	1	13:T>C	13	0.687500	0.727273	0.272727	0.727273	0.272727	0.000000	0.396694	0.396694	0.396694	4.412.500	2.650.000	166.509	-0.272727	-0.29525	3	-0.12722	1.000.000	1.000.000	1.000.000	1.000.000	1.000.000	1.000.000	1.000.000	0	0	0	0	-	0	-	0	0	1	0	1	1
100213199|F|0--8:C>T	100213199	40392	TGCAGTATCTGAAATGTATATGCATGAGATCGGAAGAGCGGTTCAGCAGGAATGCCGAGACCGATCTCG	TGCAGTATYTGAAATGTATWTGCATGAGATCGGAAGAGCGGTTCAGCAGGAATGCCGAGACCGATCTCG	3	2		8	0.937500	0.933333	0.066667	0.933333	0.066667	0.000000	0.124444	0.124444	0.124444	4.285.185	1.700.000	252.070	-0.066667	-0.29026	3	-0.15362	1.000.000	1.000.000	1.000.000	1.000.000	1.000.000	1.000.000	1.000.000	1	1	1	1	1	1	1	1	1	0	1	1	1
100213199|F|0-8:C>T-8:C>T	100213199	40392	TGCAGTATTTGAAATGTATTTGCATGAGATCGGAAGAGCGGTTCAGCAGGAATGCCGAGACCGATCTCG	TGCAGTATYTGAAATGTATWTGCATGAGATCGGAAGAGCGGTTCAGCAGGAATGCCGAGACCGATCTCG	3	2	8:C>T	8	0.937500	0.933333	0.066667	0.933333	0.066667	0.000000	0.124444	0.124444	0.124444	4.285.185	1.700.000	252.070	-0.066667	-0.29026	3	-0.15362	1.000.000	1.000.000	1.000.000	1.000.000	1.000.000	1.000.000	1.000.000	0	0	0	0	0	0	0	0	0	1	0	0	0
100213200|F|0--19:T>A	100213200	40392	TGCAGTATCTGAAATGTATTTGCATGAGATCGGAAGAGCGGTTCAGCAGGAATGCCGAGACCGATCTCG	TGCAGTATYTGAAATGTATWTGCATGAGATCGGAAGAGCGGTTCAGCAGGAATGCCGAGACCGATCTCG	3	1		19	0.937500	0.600000	0.400000	0.600000	0.400000	0.000000	0.480000	0.480000	0.480000	4.847.059	3.058.333	158.487	-0.400000	-0.54684	3	-0.03019	1.000.000	1.000.000	1.000.000	1.000.000	1.000.000	6.000.000	6.000.000	1	0	1	0	1	0	1	0	0	1	0	1	1
100213200|F|0-19:T>A-19:T>A	100213200	40392	TGCAGTATCTGAAATGTATATGCATGAGATCGGAAGAGCGGTTCAGCAGGAATGCCGAGACCGATCTCG	TGCAGTATYTGAAATGTATWTGCATGAGATCGGAAGAGCGGTTCAGCAGGAATGCCGAGACCGATCTCG	3	1	19:T>A	19	0.937500	0.600000	0.400000	0.600000	0.400000	0.000000	0.480000	0.480000	0.480000	4.847.059	3.058.333	158.487	-0.400000	-0.54684	3	-0.03019	1.000.000	1.000.000	1.000.000	1.000.000	1.000.000	6.000.000	6.000.000	0	1	0	1	0	1	0	1	1	0	1	0	0
100213208|F|0--9:A>C	100213208	40396	TGCAGTCATAGCTCAGCACGCACGGCCAATCTGCATGAGATCGGAAGAGCGGTTCAGCAGGAATGCCGA	TGCAGTCATMGCTCAGCACGCRCGGCCAATCTGCATGAGATCGGAAGAGCGGTTCAGCAGGAATGCCGA	3	2		9	0.500000	0.750000	0.250000	0.750000	0.250000	0.000000	0.375000	0.375000	0.375000	5.383.333	3.125.000	172.267	-0.250000	-0.18817	3	-0.03355	1.000.000	1.000.000	1.000.000	1.000.000	1.000.000	1.000.000	1.000.000	-	1	-	1	-	1	-	1	1	-	1	0	0
100213208|F|0-9:A>C-9:A>C	100213208	40396	TGCAGTCATCGCTCAGCACGCGCGGCCAATCTGCATGAGATCGGAAGAGCGGTTCAGCAGGAATGCCGA	TGCAGTCATMGCTCAGCACGCRCGGCCAATCTGCATGAGATCGGAAGAGCGGTTCAGCAGGAATGCCGA	3	2	9:A>C	9	0.500000	0.750000	0.250000	0.750000	0.250000	0.000000	0.375000	0.375000	0.375000	5.383.333	3.125.000	172.267	-0.250000	-0.18817	3	-0.03355	1.000.000	1.000.000	1.000.000	1.000.000	1.000.000	1.000.000	1.000.000	-	0	-	0	-	0	-	0	0	-	0	1	1
100213208|F|0--21:A>G	100213208	40396	TGCAGTCATAGCTCAGCACGCACGGCCAATCTGCATGAGATCGGAAGAGCGGTTCAGCAGGAATGCCGA	TGCAGTCATMGCTCAGCACGCRCGGCCAATCTGCATGAGATCGGAAGAGCGGTTCAGCAGGAATGCCGA	3	1		21	0.500000	0.500000	0.500000	0.500000	0.500000	0.000000	0.500000	0.500000	0.500000	6.300.000	3.337.500	188.764	-0.500000	-0.24072	3	-0.06899	1.000.000	1.000.000	1.000.000	1.000.000	1.000.000	4.000.000	3.000.000	-	1	-	1	-	0	-	0	1	-	1	0	0
100213208|F|0-21:A>G-21:A>G	100213208	40396	TGCAGTCATAGCTCAGCACGCGCGGCCAATCTGCATGAGATCGGAAGAGCGGTTCAGCAGGAATGCCGA	TGCAGTCATMGCTCAGCACGCRCGGCCAATCTGCATGAGATCGGAAGAGCGGTTCAGCAGGAATGCCGA	3	1	21:A>G	21	0.500000	0.500000	0.500000	0.500000	0.500000	0.000000	0.500000	0.500000	0.500000	6.300.000	3.337.500	188.764	-0.500000	-0.24072	3	-0.06899	1.000.000	1.000.000	1.000.000	1.000.000	1.000.000	4.000.000	3.000.000	-	0	-	0	-	1	-	1	0	-	0	1	1
100213220|F|0--6:C>T	100213220	40402	TGCAGTCGGCCCAGCAGATGTTGCAGGACAGCAAGACCAAGATCGACATCATCCGCATGAGATCGGAAG	TGCAGTYSGCYCAGCAGATGYTGCAGGACAGCAAGACCAAGATCGACATCATCCGCATGAGATCGGAAG	3	1		6	0.437500	0.857143	0.285714	0.714286	0.142857	0.142857	0.244898	0.408163	0.326531	3.609.091	1.975.000	182.739	0.000000	-0.08738	3	-0.00190	1.000.000	1.000.000	1.000.000	1.000.000	1.000.000	1.000.000	2.000.000	-	1	-	1	-	1	-	0	1	-	1	-	1
100213220|F|0-6:C>T-6:C>T	100213220	40402	TGCAGTTGGCCCAGCAGATGTTGCAGGACAGCAAGACCAAGATCGACATCATCCGCATGAGATCGGAAG	TGCAGTYSGCYCAGCAGATGYTGCAGGACAGCAAGACCAAGATCGACATCATCCGCATGAGATCGGAAG	3	1	6:C>T	6	0.437500	0.857143	0.285714	0.714286	0.142857	0.142857	0.244898	0.408163	0.326531	3.609.091	1.975.000	182.739	0.000000	-0.08738	3	-0.00190	1.000.000	1.000.000	1.000.000	1.000.000	1.000.000	1.000.000	2.000.000	-	0	-	0	-	1	-	1	0	-	0	-	0
100213220|F|0--7:G>C	100213220	40402	TGCAGTCGGCCCAGCAGATGTTGCAGGACAGCAAGACCAAGATCGACATCATCCGCATGAGATCGGAAG	TGCAGTYSGCYCAGCAGATGYTGCAGGACAGCAAGACCAAGATCGACATCATCCGCATGAGATCGGAAG	3	3		7	0.437500	0.857143	0.142857	0.857143	0.142857	0.000000	0.244898	0.244898	0.244898	3.941.667	400.000	985.417	-0.142857	-0.12597	3	-0.01352	1.000.000	1.000.000	1.000.000	1.000.000	1.000.000	0.000000	0.000000	-	1	-	1	-	1	-	1	1	-	1	-	0
100213220|F|0-7:G>C-7:G>C	100213220	40402	TGCAGTCCGCTCAGCAGATGCTGCAGGACAGCAAGACCAAGATCGACATCATCCGCATGAGATCGGAAG	TGCAGTYSGCYCAGCAGATGYTGCAGGACAGCAAGACCAAGATCGACATCATCCGCATGAGATCGGAAG	3	3	7:G>C	7	0.437500	0.857143	0.142857	0.857143	0.142857	0.000000	0.244898	0.244898	0.244898	3.941.667	400.000	985.417	-0.142857	-0.12597	3	-0.01352	1.000.000	1.000.000	1.000.000	1.000.000	1.000.000	0.000000	0.000000	-	0	-	0	-	0	-	0	0	-	0	-	1
100213238|F|0--5:A>T	100213238	40410	TGCAGAGAGAGCAGGAAGCATGAGATCGGAAGAGCGGTTCAGCAGGAATGCCGAGACCGATCTCGTATG	TGCAGWGRGARHAGGAAGCATGAGATCGGAAGAGCGGTTCAGCAGGAATGCCGAGACCGATCTCGTATG	3	4		5	0.500000	0.750000	0.250000	0.750000	0.250000	0.000000	0.375000	0.375000	0.375000	4.475.000	2.933.333	152.557	-0.250000	-0.17434	2	0.00000	1.000.000	1.000.000	1.000.000	1.000.000	1.000.000	1.000.000	1.000.000	-	1	-	1	-	1	-	1	1	-	1	0	0
100213238|F|0-5:A>T-5:A>T	100213238	40410	TGCAGTGGGAAAAGGAAGCATGAGATCGGAAGAGCGGTTCAGCAGGAATGCCGAGACCGATCTCGTATG	TGCAGWGRGARHAGGAAGCATGAGATCGGAAGAGCGGTTCAGCAGGAATGCCGAGACCGATCTCGTATG	3	4	5:A>T	5	0.500000	0.750000	0.250000	0.750000	0.250000	0.000000	0.375000	0.375000	0.375000	4.475.000	2.933.333	152.557	-0.250000	-0.17434	2	0.00000	1.000.000	1.000.000	1.000.000	1.000.000	1.000.000	1.000.000	1.000.000	-	0	-	0	-	0	-	0	0	-	0	1	1
100213249|F|0--8:A>G	100213249	40416	TGCAGTGTAGCTAATTTTGCATGAGATCGGAAGAGCGGTTCAGCAGGAATGCCGAGACCGATCTCGTAT	TGCAGTGTRKCTARTTTTGCATGAGATCGGAAGAGCGGTTCAGCAGGAATGCCGAGACCGATCTCGTAT	3	2		8	0.500000	0.750000	0.250000	0.750000	0.250000	0.000000	0.375000	0.375000	0.375000	5.283.333	2.800.000	188.690	-0.250000	-0.17592	3	-0.02747	1.000.000	1.000.000	1.000.000	1.000.000	1.000.000	0.000000	0.000000	-	1	-	1	-	1	-	1	1	-	1	0	0
100213249|F|0-8:A>G-8:A>G	100213249	40416	TGCAGTGTGTCTAATTTTGCATGAGATCGGAAGAGCGGTTCAGCAGGAATGCCGAGACCGATCTCGTAT	TGCAGTGTRKCTARTTTTGCATGAGATCGGAAGAGCGGTTCAGCAGGAATGCCGAGACCGATCTCGTAT	3	2	8:A>G	8	0.500000	0.750000	0.250000	0.750000	0.250000	0.000000	0.375000	0.375000	0.375000	5.283.333	2.800.000	188.690	-0.250000	-0.17592	3	-0.02747	1.000.000	1.000.000	1.000.000	1.000.000	1.000.000	0.000000	0.000000	-	0	-	0	-	0	-	0	0	-	0	1	1
100213250|F|0--13:G>A	100213250	40416	TGCAGTGTAGCTAGTTTTGCATGAGATCGGAAGAGCGGTTCAGCAGGAATGCCGAGACCGATCTCGTAT	TGCAGTGTRKCTARTTTTGCATGAGATCGGAAGAGCGGTTCAGCAGGAATGCCGAGACCGATCTCGTAT	3	1		13	0.500000	0.250000	0.750000	0.250000	0.750000	0.000000	0.375000	0.375000	0.375000	5.100.000	4.672.727	109.144	-0.250000	-0.18680	3	-0.02710	1.000.000	1.000.000	1.000.000	1.000.000	1.000.000	2.000.000	2.000.000	-	0	-	0	-	1	-	1	0	-	0	0	0
100213250|F|0-13:G>A-13:G>A	100213250	40416	TGCAGTGTAGCTAATTTTGCATGAGATCGGAAGAGCGGTTCAGCAGGAATGCCGAGACCGATCTCGTAT	TGCAGTGTRKCTARTTTTGCATGAGATCGGAAGAGCGGTTCAGCAGGAATGCCGAGACCGATCTCGTAT	3	1	13:G>A	13	0.500000	0.250000	0.750000	0.250000	0.750000	0.000000	0.375000	0.375000	0.375000	5.100.000	4.672.727	109.144	-0.250000	-0.18680	3	-0.02710	1.000.000	1.000.000	1.000.000	1.000.000	1.000.000	2.000.000	2.000.000	-	1	-	1	-	0	-	0	1	-	1	1	1
100213254|F|0--13:T>C	100213254	40418	TGCAGTTAATTAATACCAGACAAGAACATGAGCATGAGATCGGAAGAGCGGTTCAGCAGGAATGCCGAG	TGCAGTTAATTAAYACYRGACAAGAACATGAGCATGAGATCGGAAGAGCGGTTCAGCAGGAATGCCGAG	3	2		13	0.500000	0.750000	0.250000	0.750000	0.250000	0.000000	0.375000	0.375000	0.375000	4.941.667	4.675.000	105.704	-0.250000	-0.17796	3	-0.03123	1.000.000	1.000.000	1.000.000	1.000.000	1.000.000	1.000.000	1.000.000	-	1	-	1	-	1	-	1	1	-	1	0	0
100213254|F|0-13:T>C-13:T>C	100213254	40418	TGCAGTTAATTAACACCGGACAAGAACATGAGCATGAGATCGGAAGAGCGGTTCAGCAGGAATGCCGAG	TGCAGTTAATTAAYACYRGACAAGAACATGAGCATGAGATCGGAAGAGCGGTTCAGCAGGAATGCCGAG	3	2	13:T>C	13	0.500000	0.750000	0.250000	0.750000	0.250000	0.000000	0.375000	0.375000	0.375000	4.941.667	4.675.000	105.704	-0.250000	-0.17796	3	-0.03123	1.000.000	1.000.000	1.000.000	1.000.000	1.000.000	1.000.000	1.000.000	-	0	-	0	-	0	-	0	0	-	0	1	1
100213254|F|0--16:C>T	100213254	40418	TGCAGTTAATTAATACCAGACAAGAACATGAGCATGAGATCGGAAGAGCGGTTCAGCAGGAATGCCGAG	TGCAGTTAATTAAYACYRGACAAGAACATGAGCATGAGATCGGAAGAGCGGTTCAGCAGGAATGCCGAG	3	1		16	0.500000	0.750000	0.250000	0.750000	0.250000	0.000000	0.375000	0.375000	0.375000	5.358.333	3.425.000	156.448	-0.250000	-0.18579	3	-0.02393	1.000.000	1.000.000	1.000.000	1.000.000	1.000.000	2.000.000	2.000.000	-	1	-	1	-	0	-	0	1	-	1	1	1
100213254|F|0-16:C>T-16:C>T	100213254	40418	TGCAGTTAATTAATACTAGACAAGAACATGAGCATGAGATCGGAAGAGCGGTTCAGCAGGAATGCCGAG	TGCAGTTAATTAAYACYRGACAAGAACATGAGCATGAGATCGGAAGAGCGGTTCAGCAGGAATGCCGAG	3	1	16:C>T	16	0.500000	0.750000	0.250000	0.750000	0.250000	0.000000	0.375000	0.375000	0.375000	5.358.333	3.425.000	156.448	-0.250000	-0.18579	3	-0.02393	1.000.000	1.000.000	1.000.000	1.000.000	1.000.000	2.000.000	2.000.000	-	0	-	0	-	1	-	1	0	-	0	0	0
100213259|F|0--10:T>G	100213259	40421	TGCAGTTCCCTGCCTCTAGCAGCCTACTGAGCATGAGATCGGAAGAGCGGTTCAGCAGGAATGCCGAGA	TGCAGTTCCCKGCCTCYAGCAGYCTRCTGAGCATGAGATCGGAAGAGCGGTTCAGCAGGAATGCCGAGA	3	2		10	0.562500	0.666667	0.333333	0.666667	0.333333	0.000000	0.444444	0.444444	0.444444	6.366.667	4.920.000	129.404	-0.333333	-0.22963	3	-0.05084	1.000.000	1.000.000	1.000.000	1.000.000	1.000.000	1.000.000	1.000.000	-	1	-	1	-	1	-	1	1	0	1	0	0
100213259|F|0-10:T>G-10:T>G	100213259	40421	TGCAGTTCCCGGCCTCCAGCAGCCTACTGAGCATGAGATCGGAAGAGCGGTTCAGCAGGAATGCCGAGA	TGCAGTTCCCKGCCTCYAGCAGYCTRCTGAGCATGAGATCGGAAGAGCGGTTCAGCAGGAATGCCGAGA	3	2	10:T>G	10	0.562500	0.666667	0.333333	0.666667	0.333333	0.000000	0.444444	0.444444	0.444444	6.366.667	4.920.000	129.404	-0.333333	-0.22963	3	-0.05084	1.000.000	1.000.000	1.000.000	1.000.000	1.000.000	1.000.000	1.000.000	-	0	-	0	-	0	-	0	0	1	0	1	1
100213279|F|0--13:C>A	100213279	40430	TGCAGTTTGTCTCCGTGCTCTATCGTGACATGGGCGAGTCCATCGAGGGCATGAGATCGGAAGAGCGGT	TGCAGTTTGTCTCMGTGCTSTATCGHGACATGGGSGAGTCCATCGAGGGCATGAGATCGGAAGAGCGGT	3	4		13	0.500000	0.750000	0.250000	0.750000	0.250000	0.000000	0.375000	0.375000	0.375000	3.141.667	1.625.000	193.333	-0.250000	-0.18342	3	-0.03023	1.000.000	1.000.000	1.000.000	1.000.000	1.000.000	1.000.000	1.000.000	-	1	-	1	-	1	-	1	1	-	1	0	0
100213279|F|0-13:C>A-13:C>A	100213279	40430	TGCAGTTTGTCTCAGTGCTGTATCGAGACATGGGGGAGTCCATCGAGGGCATGAGATCGGAAGAGCGGT	TGCAGTTTGTCTCMGTGCTSTATCGHGACATGGGSGAGTCCATCGAGGGCATGAGATCGGAAGAGCGGT	3	4	13:C>A	13	0.500000	0.750000	0.250000	0.750000	0.250000	0.000000	0.375000	0.375000	0.375000	3.141.667	1.625.000	193.333	-0.250000	-0.18342	3	-0.03023	1.000.000	1.000.000	1.000.000	1.000.000	1.000.000	1.000.000	1.000.000	-	0	-	0	-	0	-	0	0	-	0	1	1
100213279|F|0--19:C>G	100213279	40430	TGCAGTTTGTCTCCGTGCTCTATCGTGACATGGGCGAGTCCATCGAGGGCATGAGATCGGAAGAGCGGT	TGCAGTTTGTCTCMGTGCTSTATCGHGACATGGGSGAGTCCATCGAGGGCATGAGATCGGAAGAGCGGT	3	2		19	0.500000	0.500000	0.500000	0.500000	0.500000	0.000000	0.500000	0.500000	0.500000	3.750.000	1.775.000	211.268	-0.500000	-0.22645	3	-0.07108	1.000.000	1.000.000	1.000.000	1.000.000	1.000.000	4.000.000	3.000.000	-	1	-	1	-	0	-	0	1	-	1	0	0
100213279|F|0-19:C>G-19:C>G	100213279	40430	TGCAGTTTGTCTCCGTGCTGTATCGCGACATGGGCGAGTCCATCGAGGGCATGAGATCGGAAGAGCGGT	TGCAGTTTGTCTCMGTGCTSTATCGHGACATGGGSGAGTCCATCGAGGGCATGAGATCGGAAGAGCGGT	3	2	19:C>G	19	0.500000	0.500000	0.500000	0.500000	0.500000	0.000000	0.500000	0.500000	0.500000	3.750.000	1.775.000	211.268	-0.500000	-0.22645	3	-0.07108	1.000.000	1.000.000	1.000.000	1.000.000	1.000.000	4.000.000	3.000.000	-	0	-	0	-	1	-	1	0	-	0	1	1
100213330|F|0--6:A>C	100213330	40472	TGCAGAACGGGGCCAACGTGCATGAGATCGGAAGAGCGGTTCAGCAGGAATGCCGAGACCGATCTCGTA	TGCAGAMMGGKGCYAAYGTGCATGAGATCGGAAGAGCGGTTCAGCAGGAATGCCGAGACCGATCTCGTA	3	3		6	0.625000	0.200000	0.800000	0.200000	0.800000	0.000000	0.320000	0.320000	0.320000	4.100.000	3.893.750	105.297	-0.200000	-0.32422	3	-0.06705	1.000.000	1.000.000	1.000.000	1.000.000	1.000.000	2.000.000	2.000.000	-	0	-	0	1	0	1	0	0	-	0	-	-
100213330|F|0-6:A>C-6:A>C	100213330	40472	TGCAGACCGGTGCCAATGTGCATGAGATCGGAAGAGCGGTTCAGCAGGAATGCCGAGACCGATCTCGTA	TGCAGAMMGGKGCYAAYGTGCATGAGATCGGAAGAGCGGTTCAGCAGGAATGCCGAGACCGATCTCGTA	3	3	6:A>C	6	0.625000	0.200000	0.800000	0.200000	0.800000	0.000000	0.320000	0.320000	0.320000	4.100.000	3.893.750	105.297	-0.200000	-0.32422	3	-0.06705	1.000.000	1.000.000	1.000.000	1.000.000	1.000.000	2.000.000	2.000.000	-	1	-	1	0	1	0	1	1	-	1	-	-
100213331|F|0--7:A>C	100213331	40472	TGCAGACAGGTGCTAATGTGCATGAGATCGGAAGAGCGGTTCAGCAGGAATGCCGAGACCGATCTCGTA	TGCAGAMMGGKGCYAAYGTGCATGAGATCGGAAGAGCGGTTCAGCAGGAATGCCGAGACCGATCTCGTA	3	2		7	0.625000	0.200000	0.800000	0.200000	0.800000	0.000000	0.320000	0.320000	0.320000	4.050.000	3.906.250	103.680	-0.200000	-0.30718	3	-0.07198	1.000.000	1.000.000	1.000.000	1.000.000	1.000.000	2.000.000	2.000.000	-	0	-	0	0	0	0	0	0	-	0	-	-
100213331|F|0-7:A>C-7:A>C	100213331	40472	TGCAGACCGGTGCCAATGTGCATGAGATCGGAAGAGCGGTTCAGCAGGAATGCCGAGACCGATCTCGTA	TGCAGAMMGGKGCYAAYGTGCATGAGATCGGAAGAGCGGTTCAGCAGGAATGCCGAGACCGATCTCGTA	3	2	7:A>C	7	0.625000	0.200000	0.800000	0.200000	0.800000	0.000000	0.320000	0.320000	0.320000	4.050.000	3.906.250	103.680	-0.200000	-0.30718	3	-0.07198	1.000.000	1.000.000	1.000.000	1.000.000	1.000.000	2.000.000	2.000.000	-	1	-	1	1	1	1	1	1	-	1	-	-
100213413|F|0--7:T>C	100213413	40545	TGCAGACTGAGATAAACTGCATGAGATCGGAAGAGCGGTTCAGCAGGAATGCCGAGACCGATCTCGTAT	TGCAGACYKAKMTAWASTGCATGAGATCGGAAGAGCGGTTCAGCAGGAATGCCGAGACCGATCTCGTAT	3	6		7	0.562500	0.888889	0.111111	0.888889	0.111111	0.000000	0.197531	0.197531	0.197531	5.956.250	1.800.000	330.903	-0.111111	-0.18210	3	-0.04168	1.000.000	1.000.000	1.000.000	1.000.000	1.000.000	1.000.000	1.000.000	-	1	-	1	1	1	1	1	1	0	1	-	-
100213413|F|0-7:T>C-7:T>C	100213413	40545	TGCAGACCTATCTATAGTGCATGAGATCGGAAGAGCGGTTCAGCAGGAATGCCGAGACCGATCTCGTAT	TGCAGACYKAKMTAWASTGCATGAGATCGGAAGAGCGGTTCAGCAGGAATGCCGAGACCGATCTCGTAT	3	6	7:T>C	7	0.562500	0.888889	0.111111	0.888889	0.111111	0.000000	0.197531	0.197531	0.197531	5.956.250	1.800.000	330.903	-0.111111	-0.18210	3	-0.04168	1.000.000	1.000.000	1.000.000	1.000.000	1.000.000	1.000.000	1.000.000	-	0	-	0	0	0	0	0	0	1	0	-	-
100213413|F|0--10:G>T	100213413	40545	TGCAGACTGAGATAAACTGCATGAGATCGGAAGAGCGGTTCAGCAGGAATGCCGAGACCGATCTCGTAT	TGCAGACYKAKMTAWASTGCATGAGATCGGAAGAGCGGTTCAGCAGGAATGCCGAGACCGATCTCGTAT	3	3		10	0.562500	0.666667	0.333333	0.666667	0.333333	0.000000	0.444444	0.444444	0.444444	6.058.333	4.366.667	138.740	-0.333333	-0.28843	3	-0.03511	1.000.000	1.000.000	1.000.000	1.000.000	1.000.000	3.000.000	3.000.000	-	1	-	1	0	1	0	1	1	0	1	-	-
100213413|F|0-10:G>T-10:G>T	100213413	40545	TGCAGACTGATCTATACTGCATGAGATCGGAAGAGCGGTTCAGCAGGAATGCCGAGACCGATCTCGTAT	TGCAGACYKAKMTAWASTGCATGAGATCGGAAGAGCGGTTCAGCAGGAATGCCGAGACCGATCTCGTAT	3	3	10:G>T	10	0.562500	0.666667	0.333333	0.666667	0.333333	0.000000	0.444444	0.444444	0.444444	6.058.333	4.366.667	138.740	-0.333333	-0.28843	3	-0.03511	1.000.000	1.000.000	1.000.000	1.000.000	1.000.000	3.000.000	3.000.000	-	0	-	0	1	0	1	0	0	1	0	-	-
100213539|F|0--6:A>G	100213539	40644	TGCAGCACAACACACACACGCATGAGATCGGAAGAGCGGTTCAGCAGGAATGCCGAGACCGATCTCGTA	TGCAGCRMAACACACACACGCATGAGATCGGAAGAGCGGTTCAGCAGGAATGCCGAGACCGATCTCGTA	3	2		6	0.500000	0.250000	0.750000	0.250000	0.750000	0.000000	0.375000	0.375000	0.375000	11.075.000	8.083.333	137.010	-0.250000	-0.25679	3	0.00002	1.000.000	1.000.000	1.000.000	1.000.000	1.000.000	2.000.000	2.000.000	-	0	-	0	1	0	1	0	0	-	0	-	-
100213539|F|0-6:A>G-6:A>G	100213539	40644	TGCAGCGAAACACACACACGCATGAGATCGGAAGAGCGGTTCAGCAGGAATGCCGAGACCGATCTCGTA	TGCAGCRMAACACACACACGCATGAGATCGGAAGAGCGGTTCAGCAGGAATGCCGAGACCGATCTCGTA	3	2	6:A>G	6	0.500000	0.250000	0.750000	0.250000	0.750000	0.000000	0.375000	0.375000	0.375000	11.075.000	8.083.333	137.010	-0.250000	-0.25679	3	0.00002	1.000.000	1.000.000	1.000.000	1.000.000	1.000.000	2.000.000	2.000.000	-	1	-	1	0	1	0	1	1	-	1	-	-
100213627|F|0--5:T>C	100213627	40707	TGCAGTGCGAGCTCAATTAAAATGAACTTTTAATTTCTGACAAGTAAATTTGTTTTGCATGAGATCGGA	TGCAGYRCGAGCTCAATTAAAATGAACTTTTAATTTCTKACAAGTAAATTWGTTTTGCATGAGATCGGA	3	2		5	0.687500	0.636364	0.363636	0.636364	0.363636	0.000000	0.462810	0.462810	0.462810	1.876.923	1.550.000	121.092	-0.363636	-0.38311	3	-0.10453	1.000.000	1.000.000	1.000.000	1.000.000	1.000.000	4.000.000	4.000.000	0	1	0	1	0	1	0	1	1	1	1	-	-
100213627|F|0-5:T>C-5:T>C	100213627	40707	TGCAGCACGAGCTCAATTAAAATGAACTTTTAATTTCTGACAAGTAAATTTGTTTTGCATGAGATCGGA	TGCAGYRCGAGCTCAATTAAAATGAACTTTTAATTTCTKACAAGTAAATTWGTTTTGCATGAGATCGGA	3	2	5:T>C	5	0.687500	0.636364	0.363636	0.636364	0.363636	0.000000	0.462810	0.462810	0.462810	1.876.923	1.550.000	121.092	-0.363636	-0.38311	3	-0.10453	1.000.000	1.000.000	1.000.000	1.000.000	1.000.000	4.000.000	4.000.000	1	0	1	0	1	0	1	0	0	0	0	-	-
100213677|F|0--12:C>T	100213677	40737	TGCAGCTGTCACCGCCTCCGGCATGAGATCGGAAGAGCGGTTCAGCAGGAATGCCGAGACCGATCTCGT	TGCAGCTGTCACYGYCYCCGGCATGAGATCGGAAGAGCGGTTCAGCAGGAATGCCGAGACCGATCTCGT	3	3		12	0.625000	0.200000	0.800000	0.200000	0.800000	0.000000	0.320000	0.320000	0.320000	12.000.000	9.437.500	127.152	-0.200000	-0.34541	3	-0.08172	1.000.000	1.000.000	1.000.000	1.000.000	1.000.000	2.000.000	2.000.000	0	0	0	0	1	0	1	0	0	-	0	-	-
100213677|F|0-12:C>T-12:C>T	100213677	40737	TGCAGCTGTCACTGTCCCCGGCATGAGATCGGAAGAGCGGTTCAGCAGGAATGCCGAGACCGATCTCGT	TGCAGCTGTCACYGYCYCCGGCATGAGATCGGAAGAGCGGTTCAGCAGGAATGCCGAGACCGATCTCGT	3	3	12:C>T	12	0.625000	0.200000	0.800000	0.200000	0.800000	0.000000	0.320000	0.320000	0.320000	12.000.000	9.437.500	127.152	-0.200000	-0.34541	3	-0.08172	1.000.000	1.000.000	1.000.000	1.000.000	1.000.000	2.000.000	2.000.000	1	1	1	1	0	1	0	1	1	-	1	-	-
100213678|F|0--14:C>T	100213678	40737	TGCAGCTGTCACTGCCCCCGGCATGAGATCGGAAGAGCGGTTCAGCAGGAATGCCGAGACCGATCTCGT	TGCAGCTGTCACYGYCYCCGGCATGAGATCGGAAGAGCGGTTCAGCAGGAATGCCGAGACCGATCTCGT	3	1		14	0.625000	0.400000	0.600000	0.400000	0.600000	0.000000	0.480000	0.480000	0.480000	10.900.000	9.316.667	116.995	-0.400000	-0.40092	3	-0.13756	1.000.000	1.000.000	1.000.000	1.000.000	1.000.000	4.000.000	4.000.000	1	0	1	0	1	0	1	0	0	-	0	-	-
100213678|F|0-14:C>T-14:C>T	100213678	40737	TGCAGCTGTCACTGTCCCCGGCATGAGATCGGAAGAGCGGTTCAGCAGGAATGCCGAGACCGATCTCGT	TGCAGCTGTCACYGYCYCCGGCATGAGATCGGAAGAGCGGTTCAGCAGGAATGCCGAGACCGATCTCGT	3	1	14:C>T	14	0.625000	0.400000	0.600000	0.400000	0.600000	0.000000	0.480000	0.480000	0.480000	10.900.000	9.316.667	116.995	-0.400000	-0.40092	3	-0.13756	1.000.000	1.000.000	1.000.000	1.000.000	1.000.000	4.000.000	4.000.000	0	1	0	1	0	1	0	1	1	-	1	-	-
100213696|F|0--9:T>A	100213696	40752	TGCAGGAACTGCTGAAGAGCATAGATCGGAAGAGCGGTTCAGCAGGAATGCCGAGACCGATCTCGTATG	TGCAGGAACWGSTGAAGHGCATAGATCGGAAGAGCGGTTCAGCAGGAATGCCGAGACCGATCTCGTATG	3	3		9	0.625000	0.800000	0.200000	0.800000	0.200000	0.000000	0.320000	0.320000	0.320000	309.091	200.000	154.545	-0.200000	-0.21278	3	-0.01718	1.000.000	1.000.000	1.000.000	1.000.000	1.000.000	2.000.000	2.000.000	-	1	-	1	0	1	0	1	1	1	1	1	-
100213696|F|0-9:T>A-9:T>A	100213696	40752	TGCAGGAACAGGTGAAGTGCATAGATCGGAAGAGCGGTTCAGCAGGAATGCCGAGACCGATCTCGTATG	TGCAGGAACWGSTGAAGHGCATAGATCGGAAGAGCGGTTCAGCAGGAATGCCGAGACCGATCTCGTATG	3	3	9:T>A	9	0.625000	0.800000	0.200000	0.800000	0.200000	0.000000	0.320000	0.320000	0.320000	309.091	200.000	154.545	-0.200000	-0.21278	3	-0.01718	1.000.000	1.000.000	1.000.000	1.000.000	1.000.000	2.000.000	2.000.000	-	0	-	0	1	0	1	0	0	0	0	0	-
100213761|F|0--11:A>G	100213761	40798	TGCAGGCTGCGAGCGTTCATCTCAAGCATGGCATGAGATCGGAAGAGCGGTTCAGCAGGAATGCCGAGA	TGCAGGCTGCGRGCGTTCATYTCMAGCATGGCATGAGATCGGAAGAGCGGTTCAGCAGGAATGCCGAGA	3	2		11	0.500000	0.250000	0.750000	0.250000	0.750000	0.000000	0.375000	0.375000	0.375000	9.425.000	4.575.000	206.011	-0.250000	-0.27229	3	-0.04865	1.000.000	1.000.000	1.000.000	1.000.000	1.000.000	2.000.000	2.000.000	-	0	-	0	1	0	1	0	0	-	0	-	-
100213761|F|0-11:A>G-11:A>G	100213761	40798	TGCAGGCTGCGGGCGTTCATCTCCAGCATGGCATGAGATCGGAAGAGCGGTTCAGCAGGAATGCCGAGA	TGCAGGCTGCGRGCGTTCATYTCMAGCATGGCATGAGATCGGAAGAGCGGTTCAGCAGGAATGCCGAGA	3	2	11:A>G	11	0.500000	0.250000	0.750000	0.250000	0.750000	0.000000	0.375000	0.375000	0.375000	9.425.000	4.575.000	206.011	-0.250000	-0.27229	3	-0.04865	1.000.000	1.000.000	1.000.000	1.000.000	1.000.000	2.000.000	2.000.000	-	1	-	1	0	1	0	1	1	-	1	-	-
100213762|F|0--20:C>T	100213762	40798	TGCAGGCTGCGGGCGTTCATCTCCAGCATGGCATGAGATCGGAAGAGCGGTTCAGCAGGAATGCCGAGA	TGCAGGCTGCGRGCGTTCATYTCMAGCATGGCATGAGATCGGAAGAGCGGTTCAGCAGGAATGCCGAGA	3	1		20	0.500000	0.750000	0.250000	0.750000	0.250000	0.000000	0.375000	0.375000	0.375000	6.541.667	3.525.000	185.579	-0.250000	-0.21856	3	-0.04402	1.000.000	1.000.000	1.000.000	1.000.000	1.000.000	2.000.000	2.000.000	-	1	-	1	1	0	1	0	1	-	1	-	-
100213762|F|0-20:C>T-20:C>T	100213762	40798	TGCAGGCTGCGGGCGTTCATTTCCAGCATGGCATGAGATCGGAAGAGCGGTTCAGCAGGAATGCCGAGA	TGCAGGCTGCGRGCGTTCATYTCMAGCATGGCATGAGATCGGAAGAGCGGTTCAGCAGGAATGCCGAGA	3	1	20:C>T	20	0.500000	0.750000	0.250000	0.750000	0.250000	0.000000	0.375000	0.375000	0.375000	6.541.667	3.525.000	185.579	-0.250000	-0.21856	3	-0.04402	1.000.000	1.000.000	1.000.000	1.000.000	1.000.000	2.000.000	2.000.000	-	0	-	0	0	1	0	1	0	-	0	-	-
100213855|F|0--5:A>T	100213855	40858	TGCAGAATGCGACAAAGCATAGATCGGAAGAGCGGTTCAGCAGGAATGCCGAGACCGATCTCGTATGCC	TGCAGWRTGMGACMMMGCATAGATCGGAAGAGCGGTTCAGCAGGAATGCCGAGACCGATCTCGTATGCC	3	6		5	0.625000	0.200000	0.800000	0.200000	0.800000	0.000000	0.320000	0.320000	0.320000	300.000	176.923	169.565	-0.200000	-0.19197	3	-0.04322	1.000.000	1.000.000	1.000.000	1.000.000	1.000.000	0.000000	0.000000	1	0	1	0	0	0	0	0	0	-	0	-	-
100213855|F|0-5:A>T-5:A>T	100213855	40858	TGCAGTGTGAGACCCCGCATAGATCGGAAGAGCGGTTCAGCAGGAATGCCGAGACCGATCTCGTATGCC	TGCAGWRTGMGACMMMGCATAGATCGGAAGAGCGGTTCAGCAGGAATGCCGAGACCGATCTCGTATGCC	3	6	5:A>T	5	0.625000	0.200000	0.800000	0.200000	0.800000	0.000000	0.320000	0.320000	0.320000	300.000	176.923	169.565	-0.200000	-0.19197	3	-0.04322	1.000.000	1.000.000	1.000.000	1.000.000	1.000.000	0.000000	0.000000	0	1	0	1	1	1	1	1	1	-	1	-	-
100213856|F|0--6:A>G	100213856	40858	TGCAGTATGAGACAACGCATAGATCGGAAGAGCGGTTCAGCAGGAATGCCGAGACCGATCTCGTATGCC	TGCAGWRTGMGACMMMGCATAGATCGGAAGAGCGGTTCAGCAGGAATGCCGAGACCGATCTCGTATGCC	3	3		6	0.625000	0.400000	0.600000	0.400000	0.600000	0.000000	0.480000	0.480000	0.480000	216.667	177.778	121.875	-0.400000	-0.25196	3	-0.05757	1.000.000	1.000.000	1.000.000	1.000.000	1.000.000	2.000.000	2.000.000	1	0	1	0	1	0	1	0	0	-	0	-	-
100213856|F|0-6:A>G-6:A>G	100213856	40858	TGCAGTGTGAGACCCCGCATAGATCGGAAGAGCGGTTCAGCAGGAATGCCGAGACCGATCTCGTATGCC	TGCAGWRTGMGACMMMGCATAGATCGGAAGAGCGGTTCAGCAGGAATGCCGAGACCGATCTCGTATGCC	3	3	6:A>G	6	0.625000	0.400000	0.600000	0.400000	0.600000	0.000000	0.480000	0.480000	0.480000	216.667	177.778	121.875	-0.400000	-0.25196	3	-0.05757	1.000.000	1.000.000	1.000.000	1.000.000	1.000.000	2.000.000	2.000.000	0	1	0	1	0	1	0	1	1	-	1	-	-
100213953|F|0--5:C>G	100213953	40923	TGCAGCAGGTGAGCAACACAGCATGAGATCGGAAGAGCGGTTCAGCAGGAATGCCGAGACCGATCTCGT	TGCAGSMKGTGAGCMACACAGCATGAGATCGGAAGAGCGGTTCAGCAGGAATGCCGAGACCGATCTCGT	3	3		5	0.562500	0.333333	0.666667	0.333333	0.666667	0.000000	0.444444	0.444444	0.444444	7.000.000	6.958.333	100.599	-0.333333	-0.26743	3	0.00014	1.000.000	1.000.000	1.000.000	1.000.000	1.000.000	2.000.000	2.000.000	1	0	1	0	-	0	1	0	0	-	0	-	-
100213953|F|0-5:C>G-5:C>G	100213953	40923	TGCAGGATGTGAGCCACACAGCATGAGATCGGAAGAGCGGTTCAGCAGGAATGCCGAGACCGATCTCGT	TGCAGSMKGTGAGCMACACAGCATGAGATCGGAAGAGCGGTTCAGCAGGAATGCCGAGACCGATCTCGT	3	3	5:C>G	5	0.562500	0.333333	0.666667	0.333333	0.666667	0.000000	0.444444	0.444444	0.444444	7.000.000	6.958.333	100.599	-0.333333	-0.26743	3	0.00014	1.000.000	1.000.000	1.000.000	1.000.000	1.000.000	2.000.000	2.000.000	0	1	0	1	-	1	0	1	1	-	1	-	-
100214043|F|0--5:G>A	100214043	40980	TGCAGGAATTTGCTGCCTGCATGAGATCGGAAGAGCGGTTCAGCAGGAATGCCGAGACCGATCTCGTAT	TGCAGRAATTYGYTGCMTGCATGAGATCGGAAGAGCGGTTCAGCAGGAATGCCGAGACCGATCTCGTAT	3	4		5	0.500000	0.250000	0.750000	0.250000	0.750000	0.000000	0.375000	0.375000	0.375000	8.625.000	1.541.667	559.459	-0.250000	-0.23526	3	-0.03301	1.000.000	1.000.000	1.000.000	1.000.000	1.000.000	2.000.000	2.000.000	-	0	-	0	-	0	-	0	0	-	0	-	-
100214043|F|0-5:G>A-5:G>A	100214043	40980	TGCAGAAATTCGTTGCATGCATGAGATCGGAAGAGCGGTTCAGCAGGAATGCCGAGACCGATCTCGTAT	TGCAGRAATTYGYTGCMTGCATGAGATCGGAAGAGCGGTTCAGCAGGAATGCCGAGACCGATCTCGTAT	3	4	5:G>A	5	0.500000	0.250000	0.750000	0.250000	0.750000	0.000000	0.375000	0.375000	0.375000	8.625.000	1.541.667	559.459	-0.250000	-0.23526	3	-0.03301	1.000.000	1.000.000	1.000.000	1.000.000	1.000.000	2.000.000	2.000.000	-	1	-	1	-	1	-	1	1	-	1	-	-
100214044|F|0--10:T>C	100214044	40980	TGCAGAAATTTGTTGCATGCATGAGATCGGAAGAGCGGTTCAGCAGGAATGCCGAGACCGATCTCGTAT	TGCAGRAATTYGYTGCMTGCATGAGATCGGAAGAGCGGTTCAGCAGGAATGCCGAGACCGATCTCGTAT	3	1		10	0.500000	0.500000	0.500000	0.500000	0.500000	0.000000	0.500000	0.500000	0.500000	4.637.500	1.987.500	233.333	-0.500000	-0.21867	3	-0.06005	1.000.000	1.000.000	1.000.000	1.000.000	1.000.000	4.000.000	4.000.000	-	0	-	0	-	1	-	1	0	-	0	-	-
100214044|F|0-10:T>C-10:T>C	100214044	40980	TGCAGAAATTCGTTGCATGCATGAGATCGGAAGAGCGGTTCAGCAGGAATGCCGAGACCGATCTCGTAT	TGCAGRAATTYGYTGCMTGCATGAGATCGGAAGAGCGGTTCAGCAGGAATGCCGAGACCGATCTCGTAT	3	1	10:T>C	10	0.500000	0.500000	0.500000	0.500000	0.500000	0.000000	0.500000	0.500000	0.500000	4.637.500	1.987.500	233.333	-0.500000	-0.21867	3	-0.06005	1.000.000	1.000.000	1.000.000	1.000.000	1.000.000	4.000.000	4.000.000	-	1	-	1	-	0	-	0	1	-	1	-	-
100214135|F|0--17:T>C	100214135	41040	TGCAGAAGCTGGCTGATTTGCGGCAGCTGGTGACAGAGCATGAGATCGGAAGAGCGGTTCAGCAGGAAT	TGCAGAAGCTGGCTGATYTGCGGCWGYTGGTGACAGAGCATGAGATCGGAAGAGCGGTTCAGCAGGAAT	3	2		17	0.500000	0.250000	0.750000	0.250000	0.750000	0.000000	0.375000	0.375000	0.375000	10.125.000	4.108.333	246.450	-0.250000	-0.26237	3	0.00008	1.000.000	1.000.000	1.000.000	1.000.000	1.000.000	2.000.000	2.000.000	-	0	-	0	-	0	-	0	0	-	0	-	-
100214135|F|0-17:T>C-17:T>C	100214135	41040	TGCAGAAGCTGGCTGATCTGCGGCAGTTGGTGACAGAGCATGAGATCGGAAGAGCGGTTCAGCAGGAAT	TGCAGAAGCTGGCTGATYTGCGGCWGYTGGTGACAGAGCATGAGATCGGAAGAGCGGTTCAGCAGGAAT	3	2	17:T>C	17	0.500000	0.250000	0.750000	0.250000	0.750000	0.000000	0.375000	0.375000	0.375000	10.125.000	4.108.333	246.450	-0.250000	-0.26237	3	0.00008	1.000.000	1.000.000	1.000.000	1.000.000	1.000.000	2.000.000	2.000.000	-	1	-	1	-	1	-	1	1	-	1	-	-
100214137|F|0--8:T>C	100214137	41041	TGCAGAAGTTGTGGATGATGCATGAGATCGGAAGAGCGGTTCAGCAGGAATGCCGAGACCGATCTCGTA	TGCAGAMGYTGTGGATGATGCATGAGATCGGAAGAGCGGTTCAGCAGGAATGCCGAGACCGATCTCGTA	3	1		8	0.500000	0.250000	0.750000	0.250000	0.750000	0.000000	0.375000	0.375000	0.375000	10.200.000	7.841.667	130.074	-0.250000	-0.23148	3	0.00011	1.000.000	1.000.000	1.000.000	1.000.000	1.000.000	2.000.000	2.000.000	-	0	-	0	-	0	-	0	0	-	0	-	-
100214137|F|0-8:T>C-8:T>C	100214137	41041	TGCAGAAGCTGTGGATGATGCATGAGATCGGAAGAGCGGTTCAGCAGGAATGCCGAGACCGATCTCGTA	TGCAGAMGYTGTGGATGATGCATGAGATCGGAAGAGCGGTTCAGCAGGAATGCCGAGACCGATCTCGTA	3	1	8:T>C	8	0.500000	0.250000	0.750000	0.250000	0.750000	0.000000	0.375000	0.375000	0.375000	10.200.000	7.841.667	130.074	-0.250000	-0.23148	3	0.00011	1.000.000	1.000.000	1.000.000	1.000.000	1.000.000	2.000.000	2.000.000	-	1	-	1	-	1	-	1	1	-	1	-	-
100214147|F|0--5:A>G	100214147	41049	TGCAGAAGGTCTTTGGTGACATAGGGTGCATTGATGAGCATGAGATCGGAAGAGCGGTTCAGCAGGAAT	TGCAGRAGGTCTTTGGTGACATAGGGKGCMTTGATGAGCATGAGATCGGAAGAGCGGTTCAGCAGGAAT	3	2		5	0.437500	0.857143	0.142857	0.857143	0.142857	0.000000	0.244898	0.244898	0.244898	8.816.667	4.350.000	202.682	-0.142857	-0.13554	3	0.00029	1.000.000	1.000.000	1.000.000	1.000.000	1.000.000	1.000.000	1.000.000	-	1	-	1	-	1	-	1	1	0	1	-	-
100214147|F|0-5:A>G-5:A>G	100214147	41049	TGCAGGAGGTCTTTGGTGACATAGGGGGCATTGATGAGCATGAGATCGGAAGAGCGGTTCAGCAGGAAT	TGCAGRAGGTCTTTGGTGACATAGGGKGCMTTGATGAGCATGAGATCGGAAGAGCGGTTCAGCAGGAAT	3	2	5:A>G	5	0.437500	0.857143	0.142857	0.857143	0.142857	0.000000	0.244898	0.244898	0.244898	8.816.667	4.350.000	202.682	-0.142857	-0.13554	3	0.00029	1.000.000	1.000.000	1.000.000	1.000.000	1.000.000	1.000.000	1.000.000	-	0	-	0	-	0	-	0	0	1	0	-	-
100214228|F|0--13:C>T	100214228	41100	TGCAGACACGCCTCTCGGCGTGCATGAGATCGGAAGAGCGGTTCAGCAGGAATGCCGAGACCGATCTCG	TGCAGACACGCCTYTCRGCRWGCATGAGATCGGAAGAGCGGTTCAGCAGGAATGCCGAGACCGATCTCG	3	4		13	0.437500	0.857143	0.142857	0.857143	0.142857	0.000000	0.244898	0.244898	0.244898	4.891.667	4.700.000	104.078	-0.142857	-0.13581	3	-0.02452	1.000.000	1.000.000	1.000.000	1.000.000	1.000.000	1.000.000	1.000.000	-	1	-	1	-	1	-	1	1	0	1	-	-
100214228|F|0-13:C>T-13:C>T	100214228	41100	TGCAGACACGCCTTTCAGCAAGCATGAGATCGGAAGAGCGGTTCAGCAGGAATGCCGAGACCGATCTCG	TGCAGACACGCCTYTCRGCRWGCATGAGATCGGAAGAGCGGTTCAGCAGGAATGCCGAGACCGATCTCG	3	4	13:C>T	13	0.437500	0.857143	0.142857	0.857143	0.142857	0.000000	0.244898	0.244898	0.244898	4.891.667	4.700.000	104.078	-0.142857	-0.13581	3	-0.02452	1.000.000	1.000.000	1.000.000	1.000.000	1.000.000	1.000.000	1.000.000	-	0	-	0	-	0	-	0	0	1	0	-	-
100214228|F|0--16:G>A	100214228	41100	TGCAGACACGCCTCTCGGCGTGCATGAGATCGGAAGAGCGGTTCAGCAGGAATGCCGAGACCGATCTCG	TGCAGACACGCCTYTCRGCRWGCATGAGATCGGAAGAGCGGTTCAGCAGGAATGCCGAGACCGATCTCG	3	1		16	0.437500	0.571429	0.428571	0.571429	0.428571	0.000000	0.489796	0.489796	0.489796	5.487.500	4.033.333	136.054	-0.428571	-0.20849	3	-0.03354	1.000.000	1.000.000	1.000.000	1.000.000	1.000.000	3.000.000	3.000.000	-	1	-	1	-	0	-	0	1	0	1	-	-
100214228|F|0-16:G>A-16:G>A	100214228	41100	TGCAGACACGCCTCTCAGCGTGCATGAGATCGGAAGAGCGGTTCAGCAGGAATGCCGAGACCGATCTCG	TGCAGACACGCCTYTCRGCRWGCATGAGATCGGAAGAGCGGTTCAGCAGGAATGCCGAGACCGATCTCG	3	1	16:G>A	16	0.437500	0.571429	0.428571	0.571429	0.428571	0.000000	0.489796	0.489796	0.489796	5.487.500	4.033.333	136.054	-0.428571	-0.20849	3	-0.03354	1.000.000	1.000.000	1.000.000	1.000.000	1.000.000	3.000.000	3.000.000	-	0	-	0	-	1	-	1	0	1	0	-	-
100214490|F|0--8:G>T	100214490	41261	TGCAGAGGGCTGTGATGTCAGCAGCGACAGGCTGTTTGCATGAGATCGGAAGAGCGGTTCAGCAGGAAT	TGCAGAGGKCTGTGATGTCAGCMGCGACARGCTGTTTGCATGAGATCGGAAGAGCGGTTCAGCAGGAAT	3	2		8	0.437500	0.714286	0.285714	0.714286	0.285714	0.000000	0.408163	0.408163	0.408163	7.755.556	5.300.000	146.331	-0.285714	-0.16845	3	-0.05701	1.000.000	1.000.000	1.000.000	1.000.000	1.000.000	2.000.000	2.000.000	-	1	-	1	-	0	-	0	1	-	1	-	-
100214490|F|0-8:G>T-8:G>T	100214490	41261	TGCAGAGGTCTGTGATGTCAGCCGCGACAGGCTGTTTGCATGAGATCGGAAGAGCGGTTCAGCAGGAAT	TGCAGAGGKCTGTGATGTCAGCMGCGACARGCTGTTTGCATGAGATCGGAAGAGCGGTTCAGCAGGAAT	3	2	8:G>T	8	0.437500	0.714286	0.285714	0.714286	0.285714	0.000000	0.408163	0.408163	0.408163	7.755.556	5.300.000	146.331	-0.285714	-0.16845	3	-0.05701	1.000.000	1.000.000	1.000.000	1.000.000	1.000.000	2.000.000	2.000.000	-	0	-	0	-	1	-	1	0	-	0	-	-
100214491|F|0--29:A>G	100214491	41261	TGCAGAGGGCTGTGATGTCAGCAGCGACAAGCTGTTTGCATGAGATCGGAAGAGCGGTTCAGCAGGAAT	TGCAGAGGKCTGTGATGTCAGCMGCGACARGCTGTTTGCATGAGATCGGAAGAGCGGTTCAGCAGGAAT	3	1		29	0.437500	0.285714	0.714286	0.285714	0.714286	0.000000	0.408163	0.408163	0.408163	7.950.000	6.577.778	120.861	-0.285714	-0.19219	3	-0.04734	1.000.000	1.000.000	1.000.000	1.000.000	1.000.000	2.000.000	2.000.000	-	0	-	0	-	0	-	0	1	-	1	-	-
100214491|F|0-29:A>G-29:A>G	100214491	41261	TGCAGAGGGCTGTGATGTCAGCAGCGACAGGCTGTTTGCATGAGATCGGAAGAGCGGTTCAGCAGGAAT	TGCAGAGGKCTGTGATGTCAGCMGCGACARGCTGTTTGCATGAGATCGGAAGAGCGGTTCAGCAGGAAT	3	1	29:A>G	29	0.437500	0.285714	0.714286	0.285714	0.714286	0.000000	0.408163	0.408163	0.408163	7.950.000	6.577.778	120.861	-0.285714	-0.19219	3	-0.04734	1.000.000	1.000.000	1.000.000	1.000.000	1.000.000	2.000.000	2.000.000	-	1	-	1	-	1	-	1	0	-	0	-	-
100214611|F|0--8:T>C	100214611	41337	TGCAGATTTAATGCTCTGTGCATGAGATCGGAAGAGCGGTTCAGCAGGAATGCCGAGACCGATCTCGTA	TGCAGMTTYAMWGCTCTGTGCATGAGATCGGAAGAGCGGTTCAGCAGGAATGCCGAGACCGATCTCGTA	3	3		8	0.500000	0.250000	0.750000	0.250000	0.750000	0.000000	0.375000	0.375000	0.375000	9.225.000	6.075.000	151.852	-0.250000	-0.23223	3	0.00006	1.000.000	1.000.000	1.000.000	1.000.000	1.000.000	2.000.000	2.000.000	-	0	-	0	-	0	-	0	0	-	0	-	-
100214611|F|0-8:T>C-8:T>C	100214611	41337	TGCAGATTCACAGCTCTGTGCATGAGATCGGAAGAGCGGTTCAGCAGGAATGCCGAGACCGATCTCGTA	TGCAGMTTYAMWGCTCTGTGCATGAGATCGGAAGAGCGGTTCAGCAGGAATGCCGAGACCGATCTCGTA	3	3	8:T>C	8	0.500000	0.250000	0.750000	0.250000	0.750000	0.000000	0.375000	0.375000	0.375000	9.225.000	6.075.000	151.852	-0.250000	-0.23223	3	0.00006	1.000.000	1.000.000	1.000.000	1.000.000	1.000.000	2.000.000	2.000.000	-	1	-	1	-	1	-	1	1	-	1	-	-
100214670|F|0--7:G>A	100214670	41377	TGCAGCAGGAGCTTCAGCTAAAGCTGGCCAGGAAATGCCTGCATGAGATCGGAAGAGCGGTTCAGCAGG	TGCAGCARGAGCTYCAGCTRAAGCTGGCCAGGAARTGCCTGCATGAGATCGGAAGAGCGGTTCAGCAGG	3	2		7	0.500000	0.500000	0.500000	0.500000	0.500000	0.000000	0.500000	0.500000	0.500000	4.250.000	3.812.500	111.475	-0.500000	-0.27185	3	-0.10990	1.000.000	1.000.000	1.000.000	1.000.000	1.000.000	4.000.000	4.000.000	-	0	-	0	-	1	-	1	0	-	0	-	-
100214670|F|0-7:G>A-7:G>A	100214670	41377	TGCAGCAAGAGCTTCAGCTAAAGCTGGCCAGGAAGTGCCTGCATGAGATCGGAAGAGCGGTTCAGCAGG	TGCAGCARGAGCTYCAGCTRAAGCTGGCCAGGAARTGCCTGCATGAGATCGGAAGAGCGGTTCAGCAGG	3	2	7:G>A	7	0.500000	0.500000	0.500000	0.500000	0.500000	0.000000	0.500000	0.500000	0.500000	4.250.000	3.812.500	111.475	-0.500000	-0.27185	3	-0.10990	1.000.000	1.000.000	1.000.000	1.000.000	1.000.000	4.000.000	4.000.000	-	1	-	1	-	0	-	0	1	-	1	-	-
100214674|F|0--17:A>G	100214674	41379	TGCAGCAAGCCAAAAACACATGCATGAGATCGGAAGAGCGGTTCAGCAGGAATGCCGAGACCGATCTCG	TGCAGCAASCCAADAMCRCATGCATGAGATCGGAAGAGCGGTTCAGCAGGAATGCCGAGACCGATCTCG	3	2		17	0.500000	0.750000	0.250000	0.750000	0.250000	0.000000	0.375000	0.375000	0.375000	5.280.000	1.575.000	335.238	-0.250000	-0.17006	3	-0.00169	1.000.000	1.000.000	1.000.000	1.000.000	1.000.000	2.000.000	2.000.000	-	1	-	1	-	0	-	0	1	-	1	1	1
100214674|F|0-17:A>G-17:A>G	100214674	41379	TGCAGCAAGCCAAGAACGCATGCATGAGATCGGAAGAGCGGTTCAGCAGGAATGCCGAGACCGATCTCG	TGCAGCAASCCAADAMCRCATGCATGAGATCGGAAGAGCGGTTCAGCAGGAATGCCGAGACCGATCTCG	3	2	17:A>G	17	0.500000	0.750000	0.250000	0.750000	0.250000	0.000000	0.375000	0.375000	0.375000	5.280.000	1.575.000	335.238	-0.250000	-0.17006	3	-0.00169	1.000.000	1.000.000	1.000.000	1.000.000	1.000.000	2.000.000	2.000.000	-	0	-	0	-	1	-	1	0	-	0	0	0
100214687|F|0--6:G>A	100214687	41388	TGCAGCGAGGGCTAACGCATGAGATCGGAAGAGCGGTTCAGCAGGAATGCCGAGACCGATCTCGTATGC	TGCAGCRAGGGCWAMCGCATGAGATCGGAAGAGCGGTTCAGCAGGAATGCCGAGACCGATCTCGTATGC	3	3		6	0.500000	0.250000	0.750000	0.250000	0.750000	0.000000	0.375000	0.375000	0.375000	9.100.000	3.766.667	241.593	-0.250000	-0.24902	3	-0.00063	1.000.000	1.000.000	1.000.000	1.000.000	1.000.000	2.000.000	2.000.000	-	0	-	0	-	0	-	0	0	-	0	-	-
100214687|F|0-6:G>A-6:G>A	100214687	41388	TGCAGCAAGGGCAACCGCATGAGATCGGAAGAGCGGTTCAGCAGGAATGCCGAGACCGATCTCGTATGC	TGCAGCRAGGGCWAMCGCATGAGATCGGAAGAGCGGTTCAGCAGGAATGCCGAGACCGATCTCGTATGC	3	3	6:G>A	6	0.500000	0.250000	0.750000	0.250000	0.750000	0.000000	0.375000	0.375000	0.375000	9.100.000	3.766.667	241.593	-0.250000	-0.24902	3	-0.00063	1.000.000	1.000.000	1.000.000	1.000.000	1.000.000	2.000.000	2.000.000	-	1	-	1	-	1	-	1	1	-	1	-	-
100214812|F|0--5:A>C	100214812	41465	TGCAGAAGCCCTGAGAAGCCAGCTGCATGAGATCGGAAGAGCGGTTCAGCAGGAATGCCGAGACCGATC	TGCAGMAGCCCTGAGMAGCCAGCKGCATGAGATCGGAAGAGCGGTTCAGCAGGAATGCCGAGACCGATC	3	2		5	0.500000	0.250000	0.750000	0.250000	0.750000	0.000000	0.375000	0.375000	0.375000	7.775.000	6.475.000	120.077	-0.250000	-0.25503	3	-0.00038	1.000.000	1.000.000	1.000.000	1.000.000	1.000.000	2.000.000	2.000.000	-	0	-	0	-	0	-	0	0	-	0	-	-
100214812|F|0-5:A>C-5:A>C	100214812	41465	TGCAGCAGCCCTGAGAAGCCAGCGGCATGAGATCGGAAGAGCGGTTCAGCAGGAATGCCGAGACCGATC	TGCAGMAGCCCTGAGMAGCCAGCKGCATGAGATCGGAAGAGCGGTTCAGCAGGAATGCCGAGACCGATC	3	2	5:A>C	5	0.500000	0.250000	0.750000	0.250000	0.750000	0.000000	0.375000	0.375000	0.375000	7.775.000	6.475.000	120.077	-0.250000	-0.25503	3	-0.00038	1.000.000	1.000.000	1.000.000	1.000.000	1.000.000	2.000.000	2.000.000	-	1	-	1	-	1	-	1	1	-	1	-	-
100214821|F|0--14:T>C	100214821	41471	TGCAGCAGCTGAAATCGTGAGTGCACCTGGATTAGCCAGTCAACCAGGAGAGCACGCATGAGATCGGAA	TGCAGCAGCTGAAAYCGTGAGTGCACCTGGATTAGCCAGTCAACCAGGAGAGCRCGCATGAGATCGGAA	3	2		14	0.437500	0.285714	0.714286	0.285714	0.714286	0.000000	0.408163	0.408163	0.408163	3.375.000	1.377.778	244.960	-0.285714	-0.19352	3	-0.04369	1.000.000	1.000.000	1.000.000	1.000.000	1.000.000	2.000.000	2.000.000	0	1	-	1	-	0	-	0	0	-	0	-	-
100214821|F|0-14:T>C-14:T>C	100214821	41471	TGCAGCAGCTGAAACCGTGAGTGCACCTGGATTAGCCAGTCAACCAGGAGAGCGCGCATGAGATCGGAA	TGCAGCAGCTGAAAYCGTGAGTGCACCTGGATTAGCCAGTCAACCAGGAGAGCRCGCATGAGATCGGAA	3	2	14:T>C	14	0.437500	0.285714	0.714286	0.285714	0.714286	0.000000	0.408163	0.408163	0.408163	3.375.000	1.377.778	244.960	-0.285714	-0.19352	3	-0.04369	1.000.000	1.000.000	1.000.000	1.000.000	1.000.000	2.000.000	2.000.000	1	0	-	0	-	1	-	1	1	-	1	-	-
100214822|F|0--53:A>G	100214822	41471	TGCAGCAGCTGAAACCGTGAGTGCACCTGGATTAGCCAGTCAACCAGGAGAGCACGCATGAGATCGGAA	TGCAGCAGCTGAAAYCGTGAGTGCACCTGGATTAGCCAGTCAACCAGGAGAGCRCGCATGAGATCGGAA	3	1		53	0.437500	0.714286	0.285714	0.714286	0.285714	0.000000	0.408163	0.408163	0.408163	2.155.556	1.650.000	130.640	-0.285714	-0.18760	3	-0.07060	1.000.000	1.000.000	1.000.000	1.000.000	1.000.000	2.000.000	2.000.000	1	1	-	1	-	1	-	1	0	-	0	-	-
100214822|F|0-53:A>G-53:A>G	100214822	41471	TGCAGCAGCTGAAACCGTGAGTGCACCTGGATTAGCCAGTCAACCAGGAGAGCGCGCATGAGATCGGAA	TGCAGCAGCTGAAAYCGTGAGTGCACCTGGATTAGCCAGTCAACCAGGAGAGCRCGCATGAGATCGGAA	3	1	53:A>G	53	0.437500	0.714286	0.285714	0.714286	0.285714	0.000000	0.408163	0.408163	0.408163	2.155.556	1.650.000	130.640	-0.285714	-0.18760	3	-0.07060	1.000.000	1.000.000	1.000.000	1.000.000	1.000.000	2.000.000	2.000.000	0	0	-	0	-	0	-	0	1	-	1	-	-
100214830|F|0--7:A>G	100214830	41476	TGCAGCAAGAACTTGGAGTATTCATGCATAGATCGGAAGAGCGGTTCAGCAGGAATGCCGAGACCGATC	TGCAGCARGAACTTGGARTAYTCRTGCATAGATCGGAAGAGCGGTTCAGCAGGAATGCCGAGACCGATC	3	3		7	0.562500	0.222222	0.777778	0.222222	0.777778	0.000000	0.345679	0.345679	0.345679	233.333	175.000	133.333	-0.222222	-0.21094	3	-0.02595	1.000.000	1.000.000	1.000.000	1.000.000	1.000.000	1.000.000	1.000.000	0	0	0	0	-	0	-	0	-	-	0	-	-
100214830|F|0-7:A>G-7:A>G	100214830	41476	TGCAGCAGGAACTTGGAGTACTCGTGCATAGATCGGAAGAGCGGTTCAGCAGGAATGCCGAGACCGATC	TGCAGCARGAACTTGGARTAYTCRTGCATAGATCGGAAGAGCGGTTCAGCAGGAATGCCGAGACCGATC	3	3	7:A>G	7	0.562500	0.222222	0.777778	0.222222	0.777778	0.000000	0.345679	0.345679	0.345679	233.333	175.000	133.333	-0.222222	-0.21094	3	-0.02595	1.000.000	1.000.000	1.000.000	1.000.000	1.000.000	1.000.000	1.000.000	1	1	1	1	-	1	-	1	-	-	1	-	-
100214831|F|0--17:A>G	100214831	41476	TGCAGCAGGAACTTGGAATACTCGTGCATAGATCGGAAGAGCGGTTCAGCAGGAATGCCGAGACCGATC	TGCAGCARGAACTTGGARTAYTCRTGCATAGATCGGAAGAGCGGTTCAGCAGGAATGCCGAGACCGATC	3	1		17	0.562500	0.222222	0.777778	0.222222	0.777778	0.000000	0.345679	0.345679	0.345679	200.000	183.333	109.091	-0.222222	-0.18824	3	-0.03651	1.000.000	1.000.000	1.000.000	1.000.000	1.000.000	1.000.000	1.000.000	0	0	0	0	-	1	-	1	-	-	0	-	-
100214831|F|0-17:A>G-17:A>G	100214831	41476	TGCAGCAGGAACTTGGAGTACTCGTGCATAGATCGGAAGAGCGGTTCAGCAGGAATGCCGAGACCGATC	TGCAGCARGAACTTGGARTAYTCRTGCATAGATCGGAAGAGCGGTTCAGCAGGAATGCCGAGACCGATC	3	1	17:A>G	17	0.562500	0.222222	0.777778	0.222222	0.777778	0.000000	0.345679	0.345679	0.345679	200.000	183.333	109.091	-0.222222	-0.18824	3	-0.03651	1.000.000	1.000.000	1.000.000	1.000.000	1.000.000	1.000.000	1.000.000	1	1	1	1	-	0	-	0	-	-	1	-	-
100215180|F|0--22:T>G	100215180	41689	TGCAGCTCATTGTGTTGTCAGTTTGTGAAAGCATGAGATCGGAAGAGCGGTTCAGCAGGAATGCCGAGA	TGCAGCTCATTGTGTTGTCAGTKTGTGAAMGCATGAGATCGGAAGAGCGGTTCAGCAGGAATGCCGAGA	3	1		22	0.437500	0.714286	0.285714	0.714286	0.285714	0.000000	0.408163	0.408163	0.408163	5.911.111	3.250.000	181.880	-0.285714	-0.16998	3	0.00020	1.000.000	1.000.000	1.000.000	1.000.000	1.000.000	2.000.000	2.000.000	-	1	-	1	-	0	-	0	1	-	1	-	-
100215180|F|0-22:T>G-22:T>G	100215180	41689	TGCAGCTCATTGTGTTGTCAGTGTGTGAAAGCATGAGATCGGAAGAGCGGTTCAGCAGGAATGCCGAGA	TGCAGCTCATTGTGTTGTCAGTKTGTGAAMGCATGAGATCGGAAGAGCGGTTCAGCAGGAATGCCGAGA	3	1	22:T>G	22	0.437500	0.714286	0.285714	0.714286	0.285714	0.000000	0.408163	0.408163	0.408163	5.911.111	3.250.000	181.880	-0.285714	-0.16998	3	0.00020	1.000.000	1.000.000	1.000.000	1.000.000	1.000.000	2.000.000	2.000.000	-	0	-	0	-	1	-	1	0	-	0	-	-
100215286|F|0--7:G>C	100215286	41751	TGCAGCTGTGCCTTCCATGCATGAGATCGGAAGAGCGGTTCAGCAGGAATGCCGAGACCGATCTCGTAT	TGCAGCTSTGCCYTCCAKGCATKAGATCGGAAGAGCGGTTCAGCAGGAATGCCGAGACCGATCTCGTAT	3	3		7	0.500000	0.750000	0.250000	0.750000	0.250000	0.000000	0.375000	0.375000	0.375000	8.950.000	8.850.000	101.130	-0.250000	-0.25497	3	-0.00028	1.000.000	1.000.000	1.000.000	1.000.000	1.000.000	2.000.000	2.000.000	-	1	-	1	-	1	-	1	1	-	1	-	-
100215286|F|0-7:G>C-7:G>C	100215286	41751	TGCAGCTCTGCCCTCCAGGCATGAGATCGGAAGAGCGGTTCAGCAGGAATGCCGAGACCGATCTCGTAT	TGCAGCTSTGCCYTCCAKGCATKAGATCGGAAGAGCGGTTCAGCAGGAATGCCGAGACCGATCTCGTAT	3	3	7:G>C	7	0.500000	0.750000	0.250000	0.750000	0.250000	0.000000	0.375000	0.375000	0.375000	8.950.000	8.850.000	101.130	-0.250000	-0.25497	3	-0.00028	1.000.000	1.000.000	1.000.000	1.000.000	1.000.000	2.000.000	2.000.000	-	0	-	0	-	0	-	0	0	-	0	-	-
100215309|F|0--8:T>C	100215309	41765	TGCAGCTTTTGCATCTGTTCCTGCATGAGATCGGAAGAGCGGTTCAGCAGGAATGCCGAGACCGATCTC	TGCAGCTTYTGCATCTGYTCCTGCATGAGATCGGAAGAGCGGTTCAGCAGGAATGCCGAGACCGATCTC	3	1		8	0.437500	0.285714	0.714286	0.285714	0.714286	0.000000	0.408163	0.408163	0.408163	8.575.000	5.410.000	158.503	-0.285714	-0.20607	3	-0.02203	1.000.000	1.000.000	1.000.000	1.000.000	1.000.000	2.000.000	2.000.000	-	1	-	1	-	0	-	0	0	0	0	-	-
100215309|F|0-8:T>C-8:T>C	100215309	41765	TGCAGCTTCTGCATCTGTTCCTGCATGAGATCGGAAGAGCGGTTCAGCAGGAATGCCGAGACCGATCTC	TGCAGCTTYTGCATCTGYTCCTGCATGAGATCGGAAGAGCGGTTCAGCAGGAATGCCGAGACCGATCTC	3	1	8:T>C	8	0.437500	0.285714	0.714286	0.285714	0.714286	0.000000	0.408163	0.408163	0.408163	8.575.000	5.410.000	158.503	-0.285714	-0.20607	3	-0.02203	1.000.000	1.000.000	1.000.000	1.000.000	1.000.000	2.000.000	2.000.000	-	0	-	0	-	1	-	1	1	1	1	-	-
100215310|F|0--17:T>C	100215310	41765	TGCAGCTTCTGCATCTGTTCCTGCATGAGATCGGAAGAGCGGTTCAGCAGGAATGCCGAGACCGATCTC	TGCAGCTTYTGCATCTGYTCCTGCATGAGATCGGAAGAGCGGTTCAGCAGGAATGCCGAGACCGATCTC	3	1		17	0.437500	0.857143	0.142857	0.857143	0.142857	0.000000	0.244898	0.244898	0.244898	6.775.000	3.550.000	190.845	-0.142857	-0.13919	3	-0.03966	1.000.000	1.000.000	1.000.000	1.000.000	1.000.000	1.000.000	1.000.000	-	1	-	1	-	1	-	1	1	0	1	-	-
100215310|F|0-17:T>C-17:T>C	100215310	41765	TGCAGCTTCTGCATCTGCTCCTGCATGAGATCGGAAGAGCGGTTCAGCAGGAATGCCGAGACCGATCTC	TGCAGCTTYTGCATCTGYTCCTGCATGAGATCGGAAGAGCGGTTCAGCAGGAATGCCGAGACCGATCTC	3	1	17:T>C	17	0.437500	0.857143	0.142857	0.857143	0.142857	0.000000	0.244898	0.244898	0.244898	6.775.000	3.550.000	190.845	-0.142857	-0.13919	3	-0.03966	1.000.000	1.000.000	1.000.000	1.000.000	1.000.000	1.000.000	1.000.000	-	0	-	0	-	0	-	0	0	1	0	-	-
100215681|F|0--21:C>G	100215681	41998	TGCAGGGAAGGTGTTCAGTGTCAGCATGAGATCGGAAGAGCGGTTCAGCAGGAATGCCGAGACCGATCT	TGCAGGGMAGGTGTTCAGTGTSAGCATGAGATCGGAAGAGCGGTTCAGCAGGAATGCCGAGACCGATCT	3	1		21	0.437500	0.857143	0.142857	0.857143	0.142857	0.000000	0.244898	0.244898	0.244898	10.358.333	6.350.000	163.123	-0.142857	-0.14464	3	-0.00004	1.000.000	1.000.000	1.000.000	1.000.000	1.000.000	1.000.000	1.000.000	-	1	-	1	-	1	-	1	1	0	1	-	-
100215681|F|0-21:C>G-21:C>G	100215681	41998	TGCAGGGAAGGTGTTCAGTGTGAGCATGAGATCGGAAGAGCGGTTCAGCAGGAATGCCGAGACCGATCT	TGCAGGGMAGGTGTTCAGTGTSAGCATGAGATCGGAAGAGCGGTTCAGCAGGAATGCCGAGACCGATCT	3	1	21:C>G	21	0.437500	0.857143	0.142857	0.857143	0.142857	0.000000	0.244898	0.244898	0.244898	10.358.333	6.350.000	163.123	-0.142857	-0.14464	3	-0.00004	1.000.000	1.000.000	1.000.000	1.000.000	1.000.000	1.000.000	1.000.000	-	0	-	0	-	0	-	0	0	1	0	-	-
100215735|F|0--14:T>C	100215735	42029	TGCAGGGCTCTTGGTCTCCTGGGCATGAGATCGGAAGAGCGGTTCAGCAGGAATGCCGAGACCGATCTC	TGCAGGGCTCTDGGYCTCCTGGGCATGAGATCGGAAGAGCGGTTCAGCAGGAATGCCGAGACCGATCTC	3	2		14	0.437500	0.857143	0.142857	0.857143	0.142857	0.000000	0.244898	0.244898	0.244898	4.791.667	2.700.000	177.469	-0.142857	-0.12952	3	-0.02233	1.000.000	1.000.000	1.000.000	1.000.000	1.000.000	1.000.000	1.000.000	-	1	-	1	-	1	-	1	1	0	1	-	-
100215735|F|0-14:T>C-14:T>C	100215735	42029	TGCAGGGCTCTGGGCCTCCTGGGCATGAGATCGGAAGAGCGGTTCAGCAGGAATGCCGAGACCGATCTC	TGCAGGGCTCTDGGYCTCCTGGGCATGAGATCGGAAGAGCGGTTCAGCAGGAATGCCGAGACCGATCTC	3	2	14:T>C	14	0.437500	0.857143	0.142857	0.857143	0.142857	0.000000	0.244898	0.244898	0.244898	4.791.667	2.700.000	177.469	-0.142857	-0.12952	3	-0.02233	1.000.000	1.000.000	1.000.000	1.000.000	1.000.000	1.000.000	1.000.000	-	0	-	0	-	0	-	0	0	1	0	-	-
100215782|F|0--7:T>A	100215782	42059	TGCAGGGTGAGCGGGGTTGCATGAGATCGGAAGAGCGGTTCAGCAGGAATGCCGAGACCGATCTCGTAT	TGCAGGGWGMGCKGGGYTGCATGAGATCGGAAGAGCGGTTCAGCAGGAATGCCGAGACCGATCTCGTAT	3	3		7	0.437500	0.857143	0.142857	0.857143	0.142857	0.000000	0.244898	0.244898	0.244898	2.850.000	2.650.000	107.547	-0.142857	-0.12557	3	-0.02194	1.000.000	1.000.000	1.000.000	1.000.000	1.000.000	1.000.000	1.000.000	-	1	-	1	-	1	-	1	1	0	1	-	-
100215782|F|0-7:T>A-7:T>A	100215782	42059	TGCAGGGAGAGCTGGGCTGCATGAGATCGGAAGAGCGGTTCAGCAGGAATGCCGAGACCGATCTCGTAT	TGCAGGGWGMGCKGGGYTGCATGAGATCGGAAGAGCGGTTCAGCAGGAATGCCGAGACCGATCTCGTAT	3	3	7:T>A	7	0.437500	0.857143	0.142857	0.857143	0.142857	0.000000	0.244898	0.244898	0.244898	2.850.000	2.650.000	107.547	-0.142857	-0.12557	3	-0.02194	1.000.000	1.000.000	1.000.000	1.000.000	1.000.000	1.000.000	1.000.000	-	0	-	0	-	0	-	0	0	1	0	-	-
100215782|F|0--9:A>C	100215782	42059	TGCAGGGTGAGCGGGGTTGCATGAGATCGGAAGAGCGGTTCAGCAGGAATGCCGAGACCGATCTCGTAT	TGCAGGGWGMGCKGGGYTGCATGAGATCGGAAGAGCGGTTCAGCAGGAATGCCGAGACCGATCTCGTAT	3	1		9	0.437500	0.714286	0.285714	0.714286	0.285714	0.000000	0.408163	0.408163	0.408163	3.100.000	2.125.000	145.882	-0.285714	-0.16195	3	-0.01565	1.000.000	1.000.000	1.000.000	1.000.000	1.000.000	2.000.000	2.000.000	-	1	-	1	-	0	-	0	1	1	1	-	-
100215782|F|0-9:A>C-9:A>C	100215782	42059	TGCAGGGTGCGCGGGGTTGCATGAGATCGGAAGAGCGGTTCAGCAGGAATGCCGAGACCGATCTCGTAT	TGCAGGGWGMGCKGGGYTGCATGAGATCGGAAGAGCGGTTCAGCAGGAATGCCGAGACCGATCTCGTAT	3	1	9:A>C	9	0.437500	0.714286	0.285714	0.714286	0.285714	0.000000	0.408163	0.408163	0.408163	3.100.000	2.125.000	145.882	-0.285714	-0.16195	3	-0.01565	1.000.000	1.000.000	1.000.000	1.000.000	1.000.000	2.000.000	2.000.000	-	0	-	0	-	1	-	1	0	0	0	-	-
100215812|F|0--7:T>A	100215812	42077	TGCAGGTTGTTTAAAGCCTGCATGAGATCGGAAGAGCGGTTCAGCAGGAATGCCGAGACCGATCTCGTA	TGCAGGTWGTTKAARKCCTGCATGAGATCGGAAGAGCGGTTCAGCAGGAATGCCGAGACCGATCTCGTA	3	4		7	0.500000	0.250000	0.750000	0.250000	0.750000	0.000000	0.375000	0.375000	0.375000	7.450.000	3.450.000	215.942	-0.250000	-0.23767	3	0.00096	1.000.000	1.000.000	1.000.000	1.000.000	1.000.000	2.000.000	2.000.000	1	0	1	0	-	0	-	0	0	-	0	-	-
100215812|F|0-7:T>A-7:T>A	100215812	42077	TGCAGGTAGTTGAAGTCCTGCATGAGATCGGAAGAGCGGTTCAGCAGGAATGCCGAGACCGATCTCGTA	TGCAGGTWGTTKAARKCCTGCATGAGATCGGAAGAGCGGTTCAGCAGGAATGCCGAGACCGATCTCGTA	3	4	7:T>A	7	0.500000	0.250000	0.750000	0.250000	0.750000	0.000000	0.375000	0.375000	0.375000	7.450.000	3.450.000	215.942	-0.250000	-0.23767	3	0.00096	1.000.000	1.000.000	1.000.000	1.000.000	1.000.000	2.000.000	2.000.000	0	1	0	1	-	1	-	1	1	-	1	-	-
100215818|F|0--8:T>C	100215818	42080	TGCAGGTATGCCAGAAGATCCTGCTTGCATGAGATCGGAAGAGCGGTTCAGCAGGAATGCCGAGACCGA	TGCAGGTAYGCYAGMAGRTCCTGCTTGCATGAGATCGGAAGAGCGGTTCAGCAGGAATGCCGAGACCGA	3	3		8	0.500000	0.750000	0.250000	0.750000	0.250000	0.000000	0.375000	0.375000	0.375000	7.566.667	7.075.000	106.949	-0.250000	-0.25693	3	-0.06509	1.000.000	1.000.000	1.000.000	1.000.000	1.000.000	2.000.000	2.000.000	0	1	0	1	-	1	-	1	1	-	1	-	-
100215818|F|0-8:T>C-8:T>C	100215818	42080	TGCAGGTACGCCAGCAGGTCCTGCTTGCATGAGATCGGAAGAGCGGTTCAGCAGGAATGCCGAGACCGA	TGCAGGTAYGCYAGMAGRTCCTGCTTGCATGAGATCGGAAGAGCGGTTCAGCAGGAATGCCGAGACCGA	3	3	8:T>C	8	0.500000	0.750000	0.250000	0.750000	0.250000	0.000000	0.375000	0.375000	0.375000	7.566.667	7.075.000	106.949	-0.250000	-0.25693	3	-0.06509	1.000.000	1.000.000	1.000.000	1.000.000	1.000.000	2.000.000	2.000.000	1	0	1	0	-	0	-	0	0	-	0	-	-
100215868|F|0--5:G>A	100215868	42111	TGCAGGTGGCGGCTGAGTGGCATGAGATCGGAAGAGCGGTTCAGCAGGAATGCCGAGACCGATCTCGTA	TGCAGRTGGCGRMTGAGYGGCATGAGATCGGAAGAGCGGTTCAGCAGGAATGCCGAGACCGATCTCGTA	3	1		5	0.500000	0.750000	0.250000	0.750000	0.250000	0.000000	0.375000	0.375000	0.375000	7.266.667	3.850.000	188.745	-0.250000	-0.22892	3	-0.05707	1.000.000	1.000.000	1.000.000	1.000.000	1.000.000	2.000.000	2.000.000	1	1	1	1	-	0	-	0	1	-	1	-	-
100215868|F|0-5:G>A-5:G>A	100215868	42111	TGCAGATGGCGGCTGAGTGGCATGAGATCGGAAGAGCGGTTCAGCAGGAATGCCGAGACCGATCTCGTA	TGCAGRTGGCGRMTGAGYGGCATGAGATCGGAAGAGCGGTTCAGCAGGAATGCCGAGACCGATCTCGTA	3	1	5:G>A	5	0.500000	0.750000	0.250000	0.750000	0.250000	0.000000	0.375000	0.375000	0.375000	7.266.667	3.850.000	188.745	-0.250000	-0.22892	3	-0.05707	1.000.000	1.000.000	1.000.000	1.000.000	1.000.000	2.000.000	2.000.000	0	0	0	0	-	1	-	1	0	-	0	-	-
100215869|F|0--11:A>G	100215869	42111	TGCAGGTGGCGAATGAGCGGCATGAGATCGGAAGAGCGGTTCAGCAGGAATGCCGAGACCGATCTCGTA	TGCAGRTGGCGRMTGAGYGGCATGAGATCGGAAGAGCGGTTCAGCAGGAATGCCGAGACCGATCTCGTA	3	3		11	0.500000	0.250000	0.750000	0.250000	0.750000	0.000000	0.375000	0.375000	0.375000	8.675.000	5.658.333	153.314	-0.250000	-0.26941	3	-0.04801	1.000.000	1.000.000	1.000.000	1.000.000	1.000.000	2.000.000	2.000.000	1	0	1	0	-	0	-	0	0	-	0	-	-
100215869|F|0-11:A>G-11:A>G	100215869	42111	TGCAGGTGGCGGCTGAGTGGCATGAGATCGGAAGAGCGGTTCAGCAGGAATGCCGAGACCGATCTCGTA	TGCAGRTGGCGRMTGAGYGGCATGAGATCGGAAGAGCGGTTCAGCAGGAATGCCGAGACCGATCTCGTA	3	3	11:A>G	11	0.500000	0.250000	0.750000	0.250000	0.750000	0.000000	0.375000	0.375000	0.375000	8.675.000	5.658.333	153.314	-0.250000	-0.26941	3	-0.04801	1.000.000	1.000.000	1.000.000	1.000.000	1.000.000	2.000.000	2.000.000	0	1	0	1	-	1	-	1	1	-	1	-	-
100215904|F|0--10:C>T	100215904	42132	TGCAGGTTGGCGGGCGGTGCAAGTGCAATGGGCATGAGATCGGAAGAGCGGTTCAGCAGGAATGCCGAG	TGCAGGTTGGYGGGCGSTGCAAGTGCAATGGGCATGAGATCGGAAGAGCGGTTCAGCAGGAATGCCGAG	3	1		10	0.437500	0.571429	0.428571	0.571429	0.428571	0.000000	0.489796	0.489796	0.489796	3.662.500	2.000.000	183.125	-0.428571	-0.21026	3	-0.03573	1.000.000	1.000.000	1.000.000	1.000.000	1.000.000	3.000.000	3.000.000	-	1	-	1	-	0	-	0	1	0	1	-	-
100215904|F|0-10:C>T-10:C>T	100215904	42132	TGCAGGTTGGTGGGCGGTGCAAGTGCAATGGGCATGAGATCGGAAGAGCGGTTCAGCAGGAATGCCGAG	TGCAGGTTGGYGGGCGSTGCAAGTGCAATGGGCATGAGATCGGAAGAGCGGTTCAGCAGGAATGCCGAG	3	1	10:C>T	10	0.437500	0.571429	0.428571	0.571429	0.428571	0.000000	0.489796	0.489796	0.489796	3.662.500	2.000.000	183.125	-0.428571	-0.21026	3	-0.03573	1.000.000	1.000.000	1.000.000	1.000.000	1.000.000	3.000.000	3.000.000	-	0	-	0	-	1	-	1	0	1	0	-	-
100215905|F|0--16:G>C	100215905	42132	TGCAGGTTGGTGGGCGGTGCAAGTGCAATGGGCATGAGATCGGAAGAGCGGTTCAGCAGGAATGCCGAG	TGCAGGTTGGYGGGCGSTGCAAGTGCAATGGGCATGAGATCGGAAGAGCGGTTCAGCAGGAATGCCGAG	3	1		16	0.437500	0.857143	0.142857	0.857143	0.142857	0.000000	0.244898	0.244898	0.244898	3.108.333	2.000.000	155.417	-0.142857	-0.13387	3	-0.07105	1.000.000	1.000.000	1.000.000	1.000.000	1.000.000	1.000.000	1.000.000	-	1	-	1	-	1	-	1	1	0	1	-	-
100215905|F|0-16:G>C-16:G>C	100215905	42132	TGCAGGTTGGTGGGCGCTGCAAGTGCAATGGGCATGAGATCGGAAGAGCGGTTCAGCAGGAATGCCGAG	TGCAGGTTGGYGGGCGSTGCAAGTGCAATGGGCATGAGATCGGAAGAGCGGTTCAGCAGGAATGCCGAG	3	1	16:G>C	16	0.437500	0.857143	0.142857	0.857143	0.142857	0.000000	0.244898	0.244898	0.244898	3.108.333	2.000.000	155.417	-0.142857	-0.13387	3	-0.07105	1.000.000	1.000.000	1.000.000	1.000.000	1.000.000	1.000.000	1.000.000	-	0	-	0	-	0	-	0	0	1	0	-	-
100216010|F|0--7:G>T	100216010	42198	TGCAGTAGAGCCAGAACCAACATGCATGAGATCGGAAGAGCGGTTCAGCAGGAATGCCGAGACCGATCT	TGCAGTMKAGCCAGAACCAACATGCATGAGATCGGAAGAGCGGTTCAGCAGGAATGCCGAGACCGATCT	3	1		7	0.437500	0.714286	0.285714	0.714286	0.285714	0.000000	0.408163	0.408163	0.408163	6.233.333	3.525.000	176.832	-0.285714	-0.16936	3	0.00022	1.000.000	1.000.000	1.000.000	1.000.000	1.000.000	2.000.000	2.000.000	-	1	-	1	-	0	-	0	1	-	1	-	-
100216010|F|0-7:G>T-7:G>T	100216010	42198	TGCAGTATAGCCAGAACCAACATGCATGAGATCGGAAGAGCGGTTCAGCAGGAATGCCGAGACCGATCT	TGCAGTMKAGCCAGAACCAACATGCATGAGATCGGAAGAGCGGTTCAGCAGGAATGCCGAGACCGATCT	3	1	7:G>T	7	0.437500	0.714286	0.285714	0.714286	0.285714	0.000000	0.408163	0.408163	0.408163	6.233.333	3.525.000	176.832	-0.285714	-0.16936	3	0.00022	1.000.000	1.000.000	1.000.000	1.000.000	1.000.000	2.000.000	2.000.000	-	0	-	0	-	1	-	1	0	-	0	-	-
100216050|F|0--25:A>G	100216050	42222	TGCAGTATCGACAACATGTACAGTAACTATTTTCCCAAGCAGTGCATGAGATCGGAAGAGCGGTTCAGC	TGCAGTMTCGACAACATGTACAGTARCTATTTTCCCAAGCAGTGCATGAGATCGGAAGAGCGGTTCAGC	3	1		25	0.437500	0.571429	0.428571	0.571429	0.428571	0.000000	0.489796	0.489796	0.489796	6.812.500	3.160.000	215.585	-0.428571	-0.17315	3	0.00019	1.000.000	1.000.000	1.000.000	1.000.000	1.000.000	2.000.000	2.000.000	-	1	-	1	-	0	-	0	1	0	1	-	-
100216050|F|0-25:A>G-25:A>G	100216050	42222	TGCAGTATCGACAACATGTACAGTAGCTATTTTCCCAAGCAGTGCATGAGATCGGAAGAGCGGTTCAGC	TGCAGTMTCGACAACATGTACAGTARCTATTTTCCCAAGCAGTGCATGAGATCGGAAGAGCGGTTCAGC	3	1	25:A>G	25	0.437500	0.571429	0.428571	0.571429	0.428571	0.000000	0.489796	0.489796	0.489796	6.812.500	3.160.000	215.585	-0.428571	-0.17315	3	0.00019	1.000.000	1.000.000	1.000.000	1.000.000	1.000.000	2.000.000	2.000.000	-	0	-	0	-	1	-	1	0	1	0	-	-
100216077|F|0--6:G>C	100216077	42238	TGCAGTGAAAGACTCTCTGGGCATGAGATCGGAAGAGCGGTTCAGCAGGAATGCCGAGACCGATCTCGT	TGCAGTSAAAVAMWCTCTGGGCATGAGATCGGAAGAGCGGTTCAGCAGGAATGCCGAGACCGATCTCGT	3	3		6	0.500000	0.500000	0.500000	0.500000	0.500000	0.000000	0.500000	0.500000	0.500000	4.475.000	2.300.000	194.565	-0.500000	-0.25524	3	-0.09740	1.000.000	1.000.000	1.000.000	1.000.000	1.000.000	4.000.000	4.000.000	-	0	-	0	-	1	-	1	0	-	0	-	-
100216077|F|0-6:G>C-6:G>C	100216077	42238	TGCAGTCAAAAACACTCTGGGCATGAGATCGGAAGAGCGGTTCAGCAGGAATGCCGAGACCGATCTCGT	TGCAGTSAAAVAMWCTCTGGGCATGAGATCGGAAGAGCGGTTCAGCAGGAATGCCGAGACCGATCTCGT	3	3	6:G>C	6	0.500000	0.500000	0.500000	0.500000	0.500000	0.000000	0.500000	0.500000	0.500000	4.475.000	2.300.000	194.565	-0.500000	-0.25524	3	-0.09740	1.000.000	1.000.000	1.000.000	1.000.000	1.000.000	4.000.000	4.000.000	-	1	-	1	-	0	-	0	1	-	1	-	-
100216329|F|0--5:T>C	100216329	42392	TGCAGTGTCTCCTGTGCTCCTGACCCATGAGCCAGCATGAGATCGGAAGAGCGGTTCAGCAGGAATGCC	TGCAGYGTCTCCTGTGCTCYTGACCCATGMGCCAGCATGAGATCGGAAGAGCGGTTCAGCAGGAATGCC	3	2		5	0.437500	0.857143	0.142857	0.857143	0.142857	0.000000	0.244898	0.244898	0.244898	9.191.667	5.050.000	182.013	-0.142857	-0.13972	3	-0.00004	1.000.000	1.000.000	1.000.000	1.000.000	1.000.000	1.000.000	1.000.000	-	1	-	1	-	1	-	1	1	0	1	-	-
100216329|F|0-5:T>C-5:T>C	100216329	42392	TGCAGCGTCTCCTGTGCTCTTGACCCATGAGCCAGCATGAGATCGGAAGAGCGGTTCAGCAGGAATGCC	TGCAGYGTCTCCTGTGCTCYTGACCCATGMGCCAGCATGAGATCGGAAGAGCGGTTCAGCAGGAATGCC	3	2	5:T>C	5	0.437500	0.857143	0.142857	0.857143	0.142857	0.000000	0.244898	0.244898	0.244898	9.191.667	5.050.000	182.013	-0.142857	-0.13972	3	-0.00004	1.000.000	1.000.000	1.000.000	1.000.000	1.000.000	1.000.000	1.000.000	-	0	-	0	-	0	-	0	0	1	0	-	-
100216457|F|0--5:T>A	100216457	42470	TGCAGTTTGAGGGGCGTTGCATGAGATCGGAAGAGCGGTTCAGCAGGAATGCCGAGACCGATCTCGTAT	TGCAGWTTGRKRGGCSTTGCATGAGATCGGAAGAGCGGTTCAGCAGGAATGCCGAGACCGATCTCGTAT	3	5		5	0.437500	0.857143	0.142857	0.857143	0.142857	0.000000	0.244898	0.244898	0.244898	8.683.333	3.450.000	251.691	-0.142857	-0.14414	3	-0.02676	1.000.000	1.000.000	1.000.000	1.000.000	1.000.000	1.000.000	1.000.000	-	1	-	1	-	1	-	1	1	0	1	-	-
100216457|F|0-5:T>A-5:T>A	100216457	42470	TGCAGATTGGTAGGCCTTGCATGAGATCGGAAGAGCGGTTCAGCAGGAATGCCGAGACCGATCTCGTAT	TGCAGWTTGRKRGGCSTTGCATGAGATCGGAAGAGCGGTTCAGCAGGAATGCCGAGACCGATCTCGTAT	3	5	5:T>A	5	0.437500	0.857143	0.142857	0.857143	0.142857	0.000000	0.244898	0.244898	0.244898	8.683.333	3.450.000	251.691	-0.142857	-0.14414	3	-0.02676	1.000.000	1.000.000	1.000.000	1.000.000	1.000.000	1.000.000	1.000.000	-	0	-	0	-	0	-	0	0	1	0	-	-
100216457|F|0--9:A>G	100216457	42470	TGCAGTTTGAGGGGCGTTGCATGAGATCGGAAGAGCGGTTCAGCAGGAATGCCGAGACCGATCTCGTAT	TGCAGWTTGRKRGGCSTTGCATGAGATCGGAAGAGCGGTTCAGCAGGAATGCCGAGACCGATCTCGTAT	3	2		9	0.437500	0.571429	0.428571	0.571429	0.428571	0.000000	0.489796	0.489796	0.489796	10.050.000	5.116.667	196.417	-0.428571	-0.20762	3	-0.03695	1.000.000	1.000.000	1.000.000	1.000.000	1.000.000	3.000.000	3.000.000	-	1	-	1	-	0	-	0	1	0	1	-	-
100216457|F|0-9:A>G-9:A>G	100216457	42470	TGCAGTTTGGGAGGCGTTGCATGAGATCGGAAGAGCGGTTCAGCAGGAATGCCGAGACCGATCTCGTAT	TGCAGWTTGRKRGGCSTTGCATGAGATCGGAAGAGCGGTTCAGCAGGAATGCCGAGACCGATCTCGTAT	3	2	9:A>G	9	0.437500	0.571429	0.428571	0.571429	0.428571	0.000000	0.489796	0.489796	0.489796	10.050.000	5.116.667	196.417	-0.428571	-0.20762	3	-0.03695	1.000.000	1.000.000	1.000.000	1.000.000	1.000.000	3.000.000	3.000.000	-	0	-	0	-	1	-	1	0	1	0	-	-
100216468|F|0--8:G>A	100216468	42476	TGCAGTTTGTCGATGAGGTCCTGCATGAGATCGGAAGAGCGGTTCAGCAGGAATGCCGAGACCGATCTC	TGCAGTTTRTCRATRAGGTCCTGCATGAGATCGGAAGAGCGGTTCAGCAGGAATGCCGAGACCGATCTC	3	3		8	0.437500	0.857143	0.142857	0.857143	0.142857	0.000000	0.244898	0.244898	0.244898	6.258.333	4.200.000	149.008	-0.142857	-0.13909	3	-0.03823	1.000.000	1.000.000	1.000.000	1.000.000	1.000.000	1.000.000	1.000.000	-	1	-	1	-	1	-	1	1	0	1	-	-
100216468|F|0-8:G>A-8:G>A	100216468	42476	TGCAGTTTATCAATAAGGTCCTGCATGAGATCGGAAGAGCGGTTCAGCAGGAATGCCGAGACCGATCTC	TGCAGTTTRTCRATRAGGTCCTGCATGAGATCGGAAGAGCGGTTCAGCAGGAATGCCGAGACCGATCTC	3	3	8:G>A	8	0.437500	0.857143	0.142857	0.857143	0.142857	0.000000	0.244898	0.244898	0.244898	6.258.333	4.200.000	149.008	-0.142857	-0.13909	3	-0.03823	1.000.000	1.000.000	1.000.000	1.000.000	1.000.000	1.000.000	1.000.000	-	0	-	0	-	0	-	0	0	1	0	-	-
100216468|F|0--14:G>A	100216468	42476	TGCAGTTTGTCGATGAGGTCCTGCATGAGATCGGAAGAGCGGTTCAGCAGGAATGCCGAGACCGATCTC	TGCAGTTTRTCRATRAGGTCCTGCATGAGATCGGAAGAGCGGTTCAGCAGGAATGCCGAGACCGATCTC	3	1		14	0.437500	0.571429	0.428571	0.571429	0.428571	0.000000	0.489796	0.489796	0.489796	6.037.500	5.866.667	102.912	-0.428571	-0.22285	3	-0.03280	1.000.000	1.000.000	1.000.000	1.000.000	1.000.000	3.000.000	3.000.000	-	1	-	1	-	1	-	1	0	0	0	-	-
100216468|F|0-14:G>A-14:G>A	100216468	42476	TGCAGTTTGTCGATAAGGTCCTGCATGAGATCGGAAGAGCGGTTCAGCAGGAATGCCGAGACCGATCTC	TGCAGTTTRTCRATRAGGTCCTGCATGAGATCGGAAGAGCGGTTCAGCAGGAATGCCGAGACCGATCTC	3	1	14:G>A	14	0.437500	0.571429	0.428571	0.571429	0.428571	0.000000	0.489796	0.489796	0.489796	6.037.500	5.866.667	102.912	-0.428571	-0.22285	3	-0.03280	1.000.000	1.000.000	1.000.000	1.000.000	1.000.000	3.000.000	3.000.000	-	0	-	0	-	0	-	0	1	1	1	-	-
100216502|F|0--16:T>C	100216502	42496	TGCAGCACCGCACCTGTCCCCTCTGCATAGATCGGAAGAGCGGTTCAGCAGGAATGCCGAGACCGATCT	TGCAGCACCGCACCTGYCCYYTSTGCATAGATCGGAAGAGCGGTTCAGCAGGAATGCCGAGACCGATCT	3	3		16	0.625000	0.200000	0.800000	0.200000	0.800000	0.000000	0.320000	0.320000	0.320000	200.000	169.231	118.182	-0.200000	-0.20224	3	-0.07065	1.000.000	1.000.000	1.000.000	1.000.000	1.000.000	2.000.000	2.000.000	0	0	0	0	0	-	0	-	0	-	0	-	-
100216502|F|0-16:T>C-16:T>C	100216502	42496	TGCAGCACCGCACCTGCCCTCTGTGCATAGATCGGAAGAGCGGTTCAGCAGGAATGCCGAGACCGATCT	TGCAGCACCGCACCTGYCCYYTSTGCATAGATCGGAAGAGCGGTTCAGCAGGAATGCCGAGACCGATCT	3	3	16:T>C	16	0.625000	0.200000	0.800000	0.200000	0.800000	0.000000	0.320000	0.320000	0.320000	200.000	169.231	118.182	-0.200000	-0.20224	3	-0.07065	1.000.000	1.000.000	1.000.000	1.000.000	1.000.000	2.000.000	2.000.000	1	1	1	1	1	-	1	-	1	-	1	-	-
100217590|F|0--11:G>C	100217590	43347	TGCAGAGCGCTGAATGTGCATGAGATCGGAAGAGCGGTTCAGCAGGAATGCCGAGACCGATCTCGTATG	TGCAGAGMGCTSAATGTGCATGAGATCGGAAGAGCGGTTCAGCAGGAATGCCGAGACCGATCTCGTATG	3	2		11	0.500000	0.750000	0.500000	0.500000	0.250000	0.250000	0.375000	0.500000	0.437500	6.041.667	475.000	1.271.930	0.000000	-0.09665	3	-0.04310	1.000.000	0.666667	0.833333	1.000.000	0.000000	0.000000	2.000.000	-	1	-	1	-	1	-	1	1	0	1	-	-
100217590|F|0-11:G>C-11:G>C	100217590	43347	TGCAGAGAGCTCAATGTGCATGAGATCGGAAGAGCGGTTCAGCAGGAATGCCGAGACCGATCTCGTATG	TGCAGAGMGCTSAATGTGCATGAGATCGGAAGAGCGGTTCAGCAGGAATGCCGAGACCGATCTCGTATG	3	2	11:G>C	11	0.500000	0.750000	0.500000	0.500000	0.250000	0.250000	0.375000	0.500000	0.437500	6.041.667	475.000	1.271.930	0.000000	-0.09665	3	-0.04310	1.000.000	0.666667	0.833333	1.000.000	0.000000	0.000000	2.000.000	-	0	-	0	-	1	-	1	0	1	0	-	-
100217603|F|0--5:A>G	100217603	43354	TGCAGAGCTAATGAATGCATGAGATCGGAAGAGCGGTTCAGCAGGAATGCCGAGACCGATCTCGTATGC	TGCAGRGCTRATRAATGCATGAGATCGGAAGAGCGGTTCAGCAGGAATGCCGAGACCGATCTCGTATGC	3	2		5	0.562500	0.888889	0.111111	0.888889	0.111111	0.000000	0.197531	0.197531	0.197531	1.014.286	1.000.000	101.429	-0.111111	-0.13038	3	-0.01459	1.000.000	1.000.000	1.000.000	1.000.000	1.000.000	0.000000	0.000000	-	1	-	1	-	1	-	1	1	0	1	1	1
100217603|F|0-5:A>G-5:A>G	100217603	43354	TGCAGGGCTAATAAATGCATGAGATCGGAAGAGCGGTTCAGCAGGAATGCCGAGACCGATCTCGTATGC	TGCAGRGCTRATRAATGCATGAGATCGGAAGAGCGGTTCAGCAGGAATGCCGAGACCGATCTCGTATGC	3	2	5:A>G	5	0.562500	0.888889	0.111111	0.888889	0.111111	0.000000	0.197531	0.197531	0.197531	1.014.286	1.000.000	101.429	-0.111111	-0.13038	3	-0.01459	1.000.000	1.000.000	1.000.000	1.000.000	1.000.000	0.000000	0.000000	-	0	-	0	-	0	-	0	0	1	0	0	0
100217604|F|0--9:G>A	100217604	43354	TGCAGAGCTGATAAATGCATGAGATCGGAAGAGCGGTTCAGCAGGAATGCCGAGACCGATCTCGTATGC	TGCAGRGCTRATRAATGCATGAGATCGGAAGAGCGGTTCAGCAGGAATGCCGAGACCGATCTCGTATGC	3	2		9	0.562500	0.222222	0.777778	0.222222	0.777778	0.000000	0.345679	0.345679	0.345679	1.200.000	984.615	121.875	-0.222222	-0.15902	3	-0.01107	1.000.000	1.000.000	1.000.000	1.000.000	1.000.000	0.000000	0.000000	-	0	-	0	-	0	-	0	0	0	0	1	1
100217604|F|0-9:G>A-9:G>A	100217604	43354	TGCAGAGCTAATGAATGCATGAGATCGGAAGAGCGGTTCAGCAGGAATGCCGAGACCGATCTCGTATGC	TGCAGRGCTRATRAATGCATGAGATCGGAAGAGCGGTTCAGCAGGAATGCCGAGACCGATCTCGTATGC	3	2	9:G>A	9	0.562500	0.222222	0.777778	0.222222	0.777778	0.000000	0.345679	0.345679	0.345679	1.200.000	984.615	121.875	-0.222222	-0.15902	3	-0.01107	1.000.000	1.000.000	1.000.000	1.000.000	1.000.000	0.000000	0.000000	-	1	-	1	-	1	-	1	1	1	1	0	0
100217609|F|0--6:A>G	100217609	43356	TGCAGAAGTGGGAGTGGCATGAGATCGGAAGAGCGGTTCAGCAGGAATGCCGAGACCGATCTCGTATGC	TGCAGARGKGGGRGWGGCATGAGATCGGAAGAGCGGTTCAGCAGGAATGCCGAGACCGATCTCGTATGC	3	2		6	0.437500	0.714286	0.285714	0.714286	0.285714	0.000000	0.408163	0.408163	0.408163	4.530.000	2.375.000	190.737	-0.285714	-0.15056	3	-0.00254	1.000.000	1.000.000	1.000.000	1.000.000	1.000.000	1.000.000	1.000.000	-	1	-	1	-	-	-	-	1	-	1	0	0
100217609|F|0-6:A>G-6:A>G	100217609	43356	TGCAGAGGTGGGAGAGGCATGAGATCGGAAGAGCGGTTCAGCAGGAATGCCGAGACCGATCTCGTATGC	TGCAGARGKGGGRGWGGCATGAGATCGGAAGAGCGGTTCAGCAGGAATGCCGAGACCGATCTCGTATGC	3	2	6:A>G	6	0.437500	0.714286	0.285714	0.714286	0.285714	0.000000	0.408163	0.408163	0.408163	4.530.000	2.375.000	190.737	-0.285714	-0.15056	3	-0.00254	1.000.000	1.000.000	1.000.000	1.000.000	1.000.000	1.000.000	1.000.000	-	0	-	0	-	-	-	-	0	-	0	1	1
100217613|F|0--11:G>T	100217613	43358	TGCAGATGCATGAAAGCATGAGATCGGAAGAGCGGTTCAGCAGGAATGCCGAGACCGATCTCGTATGCC	TGCAGATSSATKAMAGCATGAGATCGGAAGAGCGGTTCAGCAGGAATGCCGAGACCGATCTCGTATGCC	3	2		11	0.500000	0.750000	0.250000	0.750000	0.250000	0.000000	0.375000	0.375000	0.375000	608.333	200.000	304.167	-0.250000	-0.16277	2	0.00000	1.000.000	1.000.000	1.000.000	1.000.000	1.000.000	0.000000	0.000000	-	1	-	1	-	1	-	1	1	-	1	0	0
100217613|F|0-11:G>T-11:G>T	100217613	43358	TGCAGATGCATTACAGCATGAGATCGGAAGAGCGGTTCAGCAGGAATGCCGAGACCGATCTCGTATGCC	TGCAGATSSATKAMAGCATGAGATCGGAAGAGCGGTTCAGCAGGAATGCCGAGACCGATCTCGTATGCC	3	2	11:G>T	11	0.500000	0.750000	0.250000	0.750000	0.250000	0.000000	0.375000	0.375000	0.375000	608.333	200.000	304.167	-0.250000	-0.16277	2	0.00000	1.000.000	1.000.000	1.000.000	1.000.000	1.000.000	0.000000	0.000000	-	0	-	0	-	0	-	0	0	-	0	1	1
100217616|F|0--10:G>A	100217616	43359	TGCAGATTCAGCCAGGCATGAGATCGGAAGAGCGGTTCAGCAGGAATGCCGAGACCGATCTCGTATGCC	TGCAGRTTCARSCAGGCATGAGATCGGAAGAGCGGTTCAGCAGGAATGCCGAGACCGATCTCGTATGCC	3	1		10	0.562500	0.888889	0.111111	0.888889	0.111111	0.000000	0.197531	0.197531	0.197531	3.200.000	850.000	376.471	-0.111111	-0.14647	2	0.00000	1.000.000	1.000.000	1.000.000	1.000.000	1.000.000	1.000.000	1.000.000	-	1	-	1	-	1	-	1	1	0	1	1	1
100217616|F|0-10:G>A-10:G>A	100217616	43359	TGCAGATTCAACCAGGCATGAGATCGGAAGAGCGGTTCAGCAGGAATGCCGAGACCGATCTCGTATGCC	TGCAGRTTCARSCAGGCATGAGATCGGAAGAGCGGTTCAGCAGGAATGCCGAGACCGATCTCGTATGCC	3	1	10:G>A	10	0.562500	0.888889	0.111111	0.888889	0.111111	0.000000	0.197531	0.197531	0.197531	3.200.000	850.000	376.471	-0.111111	-0.14647	2	0.00000	1.000.000	1.000.000	1.000.000	1.000.000	1.000.000	1.000.000	1.000.000	-	0	-	0	-	0	-	0	0	1	0	0	0
100217649|F|0--11:C>T	100217649	43373	TGCAGGCACTGCGTGCGTGCATGAGATCGGAAGAGCGGTTCAGCAGGAATGCCGAGACCGATCTCGTAT	TGCAGGCACTGYGTGCRTGCATGAGATCGGAAGAGCGGTTCAGCAGGAATGCCGAGACCGATCTCGTAT	3	1		11	0.500000	0.500000	0.500000	0.500000	0.500000	0.000000	0.500000	0.500000	0.500000	3.437.500	2.242.857	153.264	-0.500000	-0.23115	3	-0.04313	1.000.000	1.000.000	1.000.000	1.000.000	1.000.000	2.000.000	2.000.000	-	1	-	1	-	1	-	1	0	-	0	0	0
100217649|F|0-11:C>T-11:C>T	100217649	43373	TGCAGGCACTGTGTGCGTGCATGAGATCGGAAGAGCGGTTCAGCAGGAATGCCGAGACCGATCTCGTAT	TGCAGGCACTGYGTGCRTGCATGAGATCGGAAGAGCGGTTCAGCAGGAATGCCGAGACCGATCTCGTAT	3	1	11:C>T	11	0.500000	0.500000	0.500000	0.500000	0.500000	0.000000	0.500000	0.500000	0.500000	3.437.500	2.242.857	153.264	-0.500000	-0.23115	3	-0.04313	1.000.000	1.000.000	1.000.000	1.000.000	1.000.000	2.000.000	2.000.000	-	0	-	0	-	0	-	0	1	-	1	1	1
100217650|F|0--16:G>A	100217650	43373	TGCAGGCACTGTGTGCGTGCATGAGATCGGAAGAGCGGTTCAGCAGGAATGCCGAGACCGATCTCGTAT	TGCAGGCACTGYGTGCRTGCATGAGATCGGAAGAGCGGTTCAGCAGGAATGCCGAGACCGATCTCGTAT	3	1		16	0.500000	0.750000	0.250000	0.750000	0.250000	0.000000	0.375000	0.375000	0.375000	3.250.000	1.400.000	232.143	-0.250000	-0.16014	3	-0.07003	1.000.000	1.000.000	1.000.000	1.000.000	1.000.000	0.000000	0.000000	-	1	-	1	-	1	-	1	1	-	1	0	0
100217650|F|0-16:G>A-16:G>A	100217650	43373	TGCAGGCACTGTGTGCATGCATGAGATCGGAAGAGCGGTTCAGCAGGAATGCCGAGACCGATCTCGTAT	TGCAGGCACTGYGTGCRTGCATGAGATCGGAAGAGCGGTTCAGCAGGAATGCCGAGACCGATCTCGTAT	3	1	16:G>A	16	0.500000	0.750000	0.250000	0.750000	0.250000	0.000000	0.375000	0.375000	0.375000	3.250.000	1.400.000	232.143	-0.250000	-0.16014	3	-0.07003	1.000.000	1.000.000	1.000.000	1.000.000	1.000.000	0.000000	0.000000	-	0	-	0	-	0	-	0	0	-	0	1	1
100217654|F|0--5:G>A	100217654	43375	TGCAGGTTAGTGGCTGCATGAGATCGGAAGAGCGGTTCAGCAGGAATGCCGAGACCGATCTCGTATGCC	TGCAGRKTAGTGGSTGCATGAGATCGGAAGAGCGGTTCAGCAGGAATGCCGAGACCGATCTCGTATGCC	3	1		5	0.500000	0.500000	0.500000	0.500000	0.500000	0.000000	0.500000	0.500000	0.500000	2.328.571	2.300.000	101.242	-0.500000	-0.17518	3	-0.04433	1.000.000	1.000.000	1.000.000	1.000.000	1.000.000	3.000.000	3.000.000	-	0	-	0	-	1	-	1	0	-	0	1	1
100217654|F|0-5:G>A-5:G>A	100217654	43375	TGCAGATTAGTGGCTGCATGAGATCGGAAGAGCGGTTCAGCAGGAATGCCGAGACCGATCTCGTATGCC	TGCAGRKTAGTGGSTGCATGAGATCGGAAGAGCGGTTCAGCAGGAATGCCGAGACCGATCTCGTATGCC	3	1	5:G>A	5	0.500000	0.500000	0.500000	0.500000	0.500000	0.000000	0.500000	0.500000	0.500000	2.328.571	2.300.000	101.242	-0.500000	-0.17518	3	-0.04433	1.000.000	1.000.000	1.000.000	1.000.000	1.000.000	3.000.000	3.000.000	-	1	-	1	-	0	-	0	1	-	1	0	0
100217658|F|0--10:A>G	100217658	43377	TGCAGGTGCAATACCGCATGAGATCGGAAGAGCGGTTCAGCAGGAATGCCGAGACCGATCTCGTATGCC	TGCAGGTGCARTAYCGCATGAGATCGGAAGAGCGGTTCAGCAGGAATGCCGAGACCGATCTCGTATGCC	3	1		10	0.625000	0.600000	0.400000	0.600000	0.400000	0.000000	0.480000	0.480000	0.480000	5.808.333	4.900.000	118.537	-0.400000	-0.27229	3	-0.05551	1.000.000	1.000.000	1.000.000	1.000.000	1.000.000	2.000.000	2.000.000	-	1	-	1	-	1	-	1	1	-	1	0	0
100217658|F|0-10:A>G-10:A>G	100217658	43377	TGCAGGTGCAGTACCGCATGAGATCGGAAGAGCGGTTCAGCAGGAATGCCGAGACCGATCTCGTATGCC	TGCAGGTGCARTAYCGCATGAGATCGGAAGAGCGGTTCAGCAGGAATGCCGAGACCGATCTCGTATGCC	3	1	10:A>G	10	0.625000	0.600000	0.400000	0.600000	0.400000	0.000000	0.480000	0.480000	0.480000	5.808.333	4.900.000	118.537	-0.400000	-0.27229	3	-0.05551	1.000.000	1.000.000	1.000.000	1.000.000	1.000.000	2.000.000	2.000.000	-	0	-	0	-	0	-	0	0	-	0	1	1
100217662|F|0--9:G>A	100217662	43379	TGCAGGTGTGAAAAGAGCATGAGATCGGAAGAGCGGTTCAGCAGGAATGCCGAGACCGATCTCGTATGC	TGCAGGWGTRMAAAGAGCATGAGATCGGAAGAGCGGTTCAGCAGGAATGCCGAGACCGATCTCGTATGC	3	2		9	0.562500	0.666667	0.333333	0.666667	0.333333	0.000000	0.444444	0.444444	0.444444	2.975.000	1.816.667	163.761	-0.333333	-0.23750	2	0.00000	1.000.000	1.000.000	1.000.000	1.000.000	1.000.000	2.000.000	2.000.000	-	1	-	1	-	1	-	1	1	0	1	0	0
100217662|F|0-9:G>A-9:G>A	100217662	43379	TGCAGGTGTACAAAGAGCATGAGATCGGAAGAGCGGTTCAGCAGGAATGCCGAGACCGATCTCGTATGC	TGCAGGWGTRMAAAGAGCATGAGATCGGAAGAGCGGTTCAGCAGGAATGCCGAGACCGATCTCGTATGC	3	2	9:G>A	9	0.562500	0.666667	0.333333	0.666667	0.333333	0.000000	0.444444	0.444444	0.444444	2.975.000	1.816.667	163.761	-0.333333	-0.23750	2	0.00000	1.000.000	1.000.000	1.000.000	1.000.000	1.000.000	2.000.000	2.000.000	-	0	-	0	-	0	-	0	0	1	0	1	1
100217670|F|0--6:C>T	100217670	43382	TGCAGTCTTCCACCCAGGCATGAGATCGGAAGAGCGGTTCAGCAGGAATGCCGAGACCGATCTCGTATG	TGCAGTYTTCCWSCCAGGCATGAGATCGGAAGAGCGGTTCAGCAGGAATGCCGAGACCGATCTCGTATG	3	1		6	0.562500	0.666667	0.333333	0.666667	0.333333	0.000000	0.444444	0.444444	0.444444	8.350.000	1.933.333	431.897	-0.333333	-0.21978	3	-0.07296	1.000.000	1.000.000	1.000.000	1.000.000	1.000.000	2.000.000	2.000.000	-	1	-	1	-	1	-	1	1	0	1	0	0
100217670|F|0-6:C>T-6:C>T	100217670	43382	TGCAGTTTTCCACCCAGGCATGAGATCGGAAGAGCGGTTCAGCAGGAATGCCGAGACCGATCTCGTATG	TGCAGTYTTCCWSCCAGGCATGAGATCGGAAGAGCGGTTCAGCAGGAATGCCGAGACCGATCTCGTATG	3	1	6:C>T	6	0.562500	0.666667	0.333333	0.666667	0.333333	0.000000	0.444444	0.444444	0.444444	8.350.000	1.933.333	431.897	-0.333333	-0.21978	3	-0.07296	1.000.000	1.000.000	1.000.000	1.000.000	1.000.000	2.000.000	2.000.000	-	0	-	0	-	0	-	0	0	1	0	1	1
100217698|F|0--5:T>G	100217698	43396	TGCAGTGACAGAAATGCATGAGATCGGAAGAGCGGTTCAGCAGGAATGCCGAGACCGATCTCGTATGCC	TGCAGKRACAGAARWGCATGAGATCGGAAGAGCGGTTCAGCAGGAATGCCGAGACCGATCTCGTATGCC	3	4		5	0.500000	0.250000	0.750000	0.250000	0.750000	0.000000	0.375000	0.375000	0.375000	2.100.000	1.275.000	164.706	-0.250000	-0.20299	3	-0.08240	1.000.000	1.000.000	1.000.000	1.000.000	1.000.000	2.000.000	2.000.000	-	0	-	0	0	-	0	-	0	-	0	-	-
100217698|F|0-5:T>G-5:T>G	100217698	43396	TGCAGGAACAGAAGAGCATGAGATCGGAAGAGCGGTTCAGCAGGAATGCCGAGACCGATCTCGTATGCC	TGCAGKRACAGAARWGCATGAGATCGGAAGAGCGGTTCAGCAGGAATGCCGAGACCGATCTCGTATGCC	3	4	5:T>G	5	0.500000	0.250000	0.750000	0.250000	0.750000	0.000000	0.375000	0.375000	0.375000	2.100.000	1.275.000	164.706	-0.250000	-0.20299	3	-0.08240	1.000.000	1.000.000	1.000.000	1.000.000	1.000.000	2.000.000	2.000.000	-	1	-	1	1	-	1	-	1	-	1	-	-
100217701|F|0--6:C>A	100217701	43397	TGCAGGCCCCCCTGAGAGCATGAGATCGGAAGAGCGGTTCAGCAGGAATGCCGAGACCGATCTCGTATG	TGCAGGMCCCCCTSAGMGCATGAGATCGGAAGAGCGGTTCAGCAGGAATGCCGAGACCGATCTCGTATG	3	3		6	0.500000	0.750000	0.250000	0.750000	0.250000	0.000000	0.375000	0.375000	0.375000	5.491.667	5.300.000	103.616	-0.250000	-0.25858	2	0.00000	1.000.000	1.000.000	1.000.000	1.000.000	1.000.000	2.000.000	2.000.000	-	1	-	1	0	1	0	1	1	-	1	-	-
100217701|F|0-6:C>A-6:C>A	100217701	43397	TGCAGGACCCCCTCAGCGCATGAGATCGGAAGAGCGGTTCAGCAGGAATGCCGAGACCGATCTCGTATG	TGCAGGMCCCCCTSAGMGCATGAGATCGGAAGAGCGGTTCAGCAGGAATGCCGAGACCGATCTCGTATG	3	3	6:C>A	6	0.500000	0.750000	0.250000	0.750000	0.250000	0.000000	0.375000	0.375000	0.375000	5.491.667	5.300.000	103.616	-0.250000	-0.25858	2	0.00000	1.000.000	1.000.000	1.000.000	1.000.000	1.000.000	2.000.000	2.000.000	-	0	-	0	1	0	1	0	0	-	0	-	-
100217718|F|0--11:T>A	100217718	43404	TGCAGTCATGGTGTACAGCATGAGATCGGAAGAGCGGTTCAGCAGGAATGCCGAGACCGATCTCGTATG	TGCAGTCATGGWGWACMGCATGAGATCGGAAGAGCGGTTCAGCAGGAATGCCGAGACCGATCTCGTATG	3	2		11	0.500000	0.250000	0.750000	0.250000	0.750000	0.000000	0.375000	0.375000	0.375000	9.425.000	5.816.667	162.034	-0.250000	-0.26034	3	-0.00007	1.000.000	1.000.000	1.000.000	1.000.000	1.000.000	2.000.000	2.000.000	-	0	-	0	1	0	1	0	0	-	0	-	-
100217718|F|0-11:T>A-11:T>A	100217718	43404	TGCAGTCATGGAGAACAGCATGAGATCGGAAGAGCGGTTCAGCAGGAATGCCGAGACCGATCTCGTATG	TGCAGTCATGGWGWACMGCATGAGATCGGAAGAGCGGTTCAGCAGGAATGCCGAGACCGATCTCGTATG	3	2	11:T>A	11	0.500000	0.250000	0.750000	0.250000	0.750000	0.000000	0.375000	0.375000	0.375000	9.425.000	5.816.667	162.034	-0.250000	-0.26034	3	-0.00007	1.000.000	1.000.000	1.000.000	1.000.000	1.000.000	2.000.000	2.000.000	-	1	-	1	0	1	0	1	1	-	1	-	-
100217722|F|0--7:T>G	100217722	43406	TGCAGTGTGAGAGTTGCATGAGATCGGAAGAGCGGTTCAGCAGGAATGCCGAGACCGATCTCGTATGCC	TGCAGTGDKAGARTTGCATGAGATCGGAAGAGCGGTTCAGCAGGAATGCCGAGACCGATCTCGTATGCC	3	2		7	0.500000	0.250000	0.750000	0.250000	0.750000	0.000000	0.375000	0.375000	0.375000	7.000.000	2.833.333	247.059	-0.250000	-0.23877	2	0.00000	1.000.000	1.000.000	1.000.000	1.000.000	1.000.000	2.000.000	2.000.000	1	0	1	0	-	0	-	0	0	-	0	-	-
100217722|F|0-7:T>G-7:T>G	100217722	43406	TGCAGTGGGAGAATTGCATGAGATCGGAAGAGCGGTTCAGCAGGAATGCCGAGACCGATCTCGTATGCC	TGCAGTGDKAGARTTGCATGAGATCGGAAGAGCGGTTCAGCAGGAATGCCGAGACCGATCTCGTATGCC	3	2	7:T>G	7	0.500000	0.250000	0.750000	0.250000	0.750000	0.000000	0.375000	0.375000	0.375000	7.000.000	2.833.333	247.059	-0.250000	-0.23877	2	0.00000	1.000.000	1.000.000	1.000.000	1.000.000	1.000.000	2.000.000	2.000.000	0	1	0	1	-	1	-	1	1	-	1	-	-
100217723|F|0--8:G>T	100217723	43406	TGCAGTGGGAGAATTGCATGAGATCGGAAGAGCGGTTCAGCAGGAATGCCGAGACCGATCTCGTATGCC	TGCAGTGDKAGARTTGCATGAGATCGGAAGAGCGGTTCAGCAGGAATGCCGAGACCGATCTCGTATGCC	3	3		8	0.625000	0.800000	0.200000	0.800000	0.200000	0.000000	0.320000	0.320000	0.320000	3.875.000	1.000.000	387.500	-0.200000	-0.22480	3	-0.03318	1.000.000	1.000.000	1.000.000	1.000.000	1.000.000	1.000.000	1.000.000	1	1	1	1	0	1	0	1	1	-	1	-	-
100217723|F|0-8:G>T-8:G>T	100217723	43406	TGCAGTGATAGAGTTGCATGAGATCGGAAGAGCGGTTCAGCAGGAATGCCGAGACCGATCTCGTATGCC	TGCAGTGDKAGARTTGCATGAGATCGGAAGAGCGGTTCAGCAGGAATGCCGAGACCGATCTCGTATGCC	3	3	8:G>T	8	0.625000	0.800000	0.200000	0.800000	0.200000	0.000000	0.320000	0.320000	0.320000	3.875.000	1.000.000	387.500	-0.200000	-0.22480	3	-0.03318	1.000.000	1.000.000	1.000.000	1.000.000	1.000.000	1.000.000	1.000.000	0	0	0	0	1	0	1	0	0	-	0	-	-
100217742|F|0--5:C>A	100217742	43415	TGCAGCCAAACTCCCTCAGCATGAGATCGGAAGAGCGGTTCAGCAGGAATGCCGAGACCGATCTCGTAT	TGCAGMCAMACWCCCTCAGCATGAGATCGGAAGAGCGGTTCAGCAGGAATGCCGAGACCGATCTCGTAT	3	3		5	0.500000	0.250000	0.750000	0.250000	0.750000	0.000000	0.375000	0.375000	0.375000	11.925.000	8.666.667	137.596	-0.250000	-0.24951	2	0.00000	1.000.000	1.000.000	1.000.000	1.000.000	1.000.000	2.000.000	2.000.000	-	0	-	0	-	0	-	0	0	-	0	-	-
100217742|F|0-5:C>A-5:C>A	100217742	43415	TGCAGACACACACCCTCAGCATGAGATCGGAAGAGCGGTTCAGCAGGAATGCCGAGACCGATCTCGTAT	TGCAGMCAMACWCCCTCAGCATGAGATCGGAAGAGCGGTTCAGCAGGAATGCCGAGACCGATCTCGTAT	3	3	5:C>A	5	0.500000	0.250000	0.750000	0.250000	0.750000	0.000000	0.375000	0.375000	0.375000	11.925.000	8.666.667	137.596	-0.250000	-0.24951	2	0.00000	1.000.000	1.000.000	1.000.000	1.000.000	1.000.000	2.000.000	2.000.000	-	1	-	1	-	1	-	1	1	-	1	-	-
100217744|F|0--8:C>G	100217744	43416	TGCAGACACACAGGTCTGCATGAGATCGGAAGAGCGGTTCAGCAGGAATGCCGAGACCGATCTCGTATG	TGCAGACASACAGSTCKGCATGAGATCGGAAGAGCGGTTCAGCAGGAATGCCGAGACCGATCTCGTATG	3	2		8	0.437500	0.428571	0.571429	0.428571	0.571429	0.000000	0.489796	0.489796	0.489796	5.016.667	4.137.500	121.249	-0.428571	-0.24184	3	-0.03931	1.000.000	1.000.000	1.000.000	1.000.000	1.000.000	3.000.000	3.000.000	-	0	-	0	-	-	-	-	0	1	0	-	-
100217744|F|0-8:C>G-8:C>G	100217744	43416	TGCAGACAGACAGCTCTGCATGAGATCGGAAGAGCGGTTCAGCAGGAATGCCGAGACCGATCTCGTATG	TGCAGACASACAGSTCKGCATGAGATCGGAAGAGCGGTTCAGCAGGAATGCCGAGACCGATCTCGTATG	3	2	8:C>G	8	0.437500	0.428571	0.571429	0.428571	0.571429	0.000000	0.489796	0.489796	0.489796	5.016.667	4.137.500	121.249	-0.428571	-0.24184	3	-0.03931	1.000.000	1.000.000	1.000.000	1.000.000	1.000.000	3.000.000	3.000.000	-	1	-	1	-	-	-	-	1	0	1	-	-
100217759|F|0--5:C>A	100217759	43424	TGCAGCCGGTGGAACCGCATGAGATCGGAAGAGCGGTTCAGCAGGAATGCCGAGACCGATCTCGTATGC	TGCAGMCGGTGRAASCGCATGAGATCGGAAGAGCGGTTCAGCAGGAATGCCGAGACCGATCTCGTATGC	3	3		5	0.500000	0.250000	0.750000	0.250000	0.750000	0.000000	0.375000	0.375000	0.375000	5.500.000	2.941.667	186.969	-0.250000	-0.24103	3	-0.10571	1.000.000	1.000.000	1.000.000	1.000.000	1.000.000	2.000.000	2.000.000	-	0	-	0	-	0	-	0	0	-	0	-	-
100217759|F|0-5:C>A-5:C>A	100217759	43424	TGCAGACGGTGAAAGCGCATGAGATCGGAAGAGCGGTTCAGCAGGAATGCCGAGACCGATCTCGTATGC	TGCAGMCGGTGRAASCGCATGAGATCGGAAGAGCGGTTCAGCAGGAATGCCGAGACCGATCTCGTATGC	3	3	5:C>A	5	0.500000	0.250000	0.750000	0.250000	0.750000	0.000000	0.375000	0.375000	0.375000	5.500.000	2.941.667	186.969	-0.250000	-0.24103	3	-0.10571	1.000.000	1.000.000	1.000.000	1.000.000	1.000.000	2.000.000	2.000.000	-	1	-	1	-	1	-	1	1	-	1	-	-
100217760|F|0--11:A>G	100217760	43424	TGCAGACGGTGAAAGCGCATGAGATCGGAAGAGCGGTTCAGCAGGAATGCCGAGACCGATCTCGTATGC	TGCAGMCGGTGRAASCGCATGAGATCGGAAGAGCGGTTCAGCAGGAATGCCGAGACCGATCTCGTATGC	3	1		11	0.500000	0.250000	0.750000	0.250000	0.750000	0.000000	0.375000	0.375000	0.375000	4.025.000	3.433.333	117.233	-0.250000	-0.23369	3	-0.04541	1.000.000	1.000.000	1.000.000	1.000.000	1.000.000	2.000.000	2.000.000	-	1	-	1	-	0	-	0	0	-	0	-	-
100217760|F|0-11:A>G-11:A>G	100217760	43424	TGCAGACGGTGGAAGCGCATGAGATCGGAAGAGCGGTTCAGCAGGAATGCCGAGACCGATCTCGTATGC	TGCAGMCGGTGRAASCGCATGAGATCGGAAGAGCGGTTCAGCAGGAATGCCGAGACCGATCTCGTATGC	3	1	11:A>G	11	0.500000	0.250000	0.750000	0.250000	0.750000	0.000000	0.375000	0.375000	0.375000	4.025.000	3.433.333	117.233	-0.250000	-0.23369	3	-0.04541	1.000.000	1.000.000	1.000.000	1.000.000	1.000.000	2.000.000	2.000.000	-	0	-	0	-	1	-	1	1	-	1	-	-
100217761|F|0--5:A>C	100217761	43425	TGCAGACTCTACCCCCAGCATGAGATCGGAAGAGCGGTTCAGCAGGAATGCCGAGACCGATCTCGTATG	TGCAGMCTCTACCCMCRGCATGAGATCGGAAGAGCGGTTCAGCAGGAATGCCGAGACCGATCTCGTATG	3	3		5	0.437500	0.857143	0.142857	0.857143	0.142857	0.000000	0.244898	0.244898	0.244898	5.508.333	4.450.000	123.783	-0.142857	-0.14144	3	0.00061	1.000.000	1.000.000	1.000.000	1.000.000	1.000.000	1.000.000	1.000.000	-	1	-	1	-	1	-	1	1	0	1	-	-
100217761|F|0-5:A>C-5:A>C	100217761	43425	TGCAGCCTCTACCCACGGCATGAGATCGGAAGAGCGGTTCAGCAGGAATGCCGAGACCGATCTCGTATG	TGCAGMCTCTACCCMCRGCATGAGATCGGAAGAGCGGTTCAGCAGGAATGCCGAGACCGATCTCGTATG	3	3	5:A>C	5	0.437500	0.857143	0.142857	0.857143	0.142857	0.000000	0.244898	0.244898	0.244898	5.508.333	4.450.000	123.783	-0.142857	-0.14144	3	0.00061	1.000.000	1.000.000	1.000.000	1.000.000	1.000.000	1.000.000	1.000.000	-	0	-	0	-	0	-	0	0	1	0	-	-
100217764|F|0--12:G>C	100217764	43427	TGCAGATGTGGAGTTTGCATGAGATCGGAAGAGCGGTTCAGCAGGAATGCCGAGACCGATCTCGTATGC	TGCAGATGTGGASYTKGCATGAGATCGGAAGAGCGGTTCAGCAGGAATGCCGAGACCGATCTCGTATGC	3	2		12	0.500000	0.750000	0.250000	0.750000	0.250000	0.000000	0.375000	0.375000	0.375000	6.875.000	3.050.000	225.410	-0.250000	-0.15669	3	-0.00219	1.000.000	1.000.000	1.000.000	1.000.000	1.000.000	0.000000	0.000000	-	1	-	1	-	1	-	1	1	-	1	0	0
100217764|F|0-12:G>C-12:G>C	100217764	43427	TGCAGATGTGGACCTTGCATGAGATCGGAAGAGCGGTTCAGCAGGAATGCCGAGACCGATCTCGTATGC	TGCAGATGTGGASYTKGCATGAGATCGGAAGAGCGGTTCAGCAGGAATGCCGAGACCGATCTCGTATGC	3	2	12:G>C	12	0.500000	0.750000	0.250000	0.750000	0.250000	0.000000	0.375000	0.375000	0.375000	6.875.000	3.050.000	225.410	-0.250000	-0.15669	3	-0.00219	1.000.000	1.000.000	1.000.000	1.000.000	1.000.000	0.000000	0.000000	-	0	-	0	-	0	-	0	0	-	0	1	1
100217790|F|0--8:A>T	100217790	43442	TGCAGGAAATGCCACGCATGAGATCGGAAGAGCGGTTCAGCAGGAATGCCGAGACCGATCTCGTATGCC	TGCAGGMAWTKCCACGCATGAGATCGGAAGAGCGGTTCAGCAGGAATGCCGAGACCGATCTCGTATGCC	3	2		8	0.500000	0.250000	0.750000	0.250000	0.750000	0.000000	0.375000	0.375000	0.375000	5.875.000	2.625.000	223.810	-0.250000	-0.23709	3	0.00140	1.000.000	1.000.000	1.000.000	1.000.000	1.000.000	2.000.000	2.000.000	-	0	-	0	-	0	-	0	0	-	0	-	-
100217790|F|0-8:A>T-8:A>T	100217790	43442	TGCAGGAATTTCCACGCATGAGATCGGAAGAGCGGTTCAGCAGGAATGCCGAGACCGATCTCGTATGCC	TGCAGGMAWTKCCACGCATGAGATCGGAAGAGCGGTTCAGCAGGAATGCCGAGACCGATCTCGTATGCC	3	2	8:A>T	8	0.500000	0.250000	0.750000	0.250000	0.750000	0.000000	0.375000	0.375000	0.375000	5.875.000	2.625.000	223.810	-0.250000	-0.23709	3	0.00140	1.000.000	1.000.000	1.000.000	1.000.000	1.000.000	2.000.000	2.000.000	-	1	-	1	-	1	-	1	1	-	1	-	-
100217795|F|0--6:C>A	100217795	43444	TGCAGGCCTGCCTTTGCATGAGATCGGAAGAGCGGTTCAGCAGGAATGCCGAGACCGATCTCGTATGCC	TGCAGGMCTKCCTKTGCATGAGATCGGAAGAGCGGTTCAGCAGGAATGCCGAGACCGATCTCGTATGCC	3	3		6	0.500000	0.250000	0.750000	0.250000	0.750000	0.000000	0.375000	0.375000	0.375000	6.675.000	5.541.667	120.451	-0.250000	-0.23447	2	0.00000	1.000.000	1.000.000	1.000.000	1.000.000	1.000.000	2.000.000	2.000.000	1	0	1	0	-	0	-	0	0	-	0	-	-
100217795|F|0-6:C>A-6:C>A	100217795	43444	TGCAGGACTTCCTGTGCATGAGATCGGAAGAGCGGTTCAGCAGGAATGCCGAGACCGATCTCGTATGCC	TGCAGGMCTKCCTKTGCATGAGATCGGAAGAGCGGTTCAGCAGGAATGCCGAGACCGATCTCGTATGCC	3	3	6:C>A	6	0.500000	0.250000	0.750000	0.250000	0.750000	0.000000	0.375000	0.375000	0.375000	6.675.000	5.541.667	120.451	-0.250000	-0.23447	2	0.00000	1.000.000	1.000.000	1.000.000	1.000.000	1.000.000	2.000.000	2.000.000	0	1	0	1	-	1	-	1	1	-	1	-	-
100217806|F|0--8:A>G	100217806	43449	TGCAGGCAACTAGTGAGCATGAGATCGGAAGAGCGGTTCAGCAGGAATGCCGAGACCGATCTCGTATGC	TGCAGGMARCTAKTGAGCATGAGATCGGAAGAGCGGTTCAGCAGGAATGCCGAGACCGATCTCGTATGC	3	2		8	0.500000	0.250000	0.750000	0.250000	0.750000	0.000000	0.375000	0.375000	0.375000	8.275.000	5.141.667	160.940	-0.250000	-0.24272	3	0.00084	1.000.000	1.000.000	1.000.000	1.000.000	1.000.000	2.000.000	2.000.000	1	0	1	0	-	0	-	0	0	-	0	-	-
100217806|F|0-8:A>G-8:A>G	100217806	43449	TGCAGGCAGCTATTGAGCATGAGATCGGAAGAGCGGTTCAGCAGGAATGCCGAGACCGATCTCGTATGC	TGCAGGMARCTAKTGAGCATGAGATCGGAAGAGCGGTTCAGCAGGAATGCCGAGACCGATCTCGTATGC	3	2	8:A>G	8	0.500000	0.250000	0.750000	0.250000	0.750000	0.000000	0.375000	0.375000	0.375000	8.275.000	5.141.667	160.940	-0.250000	-0.24272	3	0.00084	1.000.000	1.000.000	1.000.000	1.000.000	1.000.000	2.000.000	2.000.000	0	1	0	1	-	1	-	1	1	-	1	-	-
100217819|F|0--7:G>A	100217819	43455	TGCAGGGGAAAGATAAGCATGAGATCGGAAGAGCGGTTCAGCAGGAATGCCGAGACCGATCTCGTATGC	TGCAGGGRAAAGMWAAGCATGAGATCGGAAGAGCGGTTCAGCAGGAATGCCGAGACCGATCTCGTATGC	3	1		7	0.437500	0.714286	0.285714	0.714286	0.285714	0.000000	0.408163	0.408163	0.408163	1.880.000	566.667	331.765	-0.285714	-0.11183	3	0.00073	1.000.000	1.000.000	1.000.000	1.000.000	1.000.000	1.000.000	1.000.000	-	1	-	1	-	0	-	0	1	1	1	-	-
100217819|F|0-7:G>A-7:G>A	100217819	43455	TGCAGGGAAAAGATAAGCATGAGATCGGAAGAGCGGTTCAGCAGGAATGCCGAGACCGATCTCGTATGC	TGCAGGGRAAAGMWAAGCATGAGATCGGAAGAGCGGTTCAGCAGGAATGCCGAGACCGATCTCGTATGC	3	1	7:G>A	7	0.437500	0.714286	0.285714	0.714286	0.285714	0.000000	0.408163	0.408163	0.408163	1.880.000	566.667	331.765	-0.285714	-0.11183	3	0.00073	1.000.000	1.000.000	1.000.000	1.000.000	1.000.000	1.000.000	1.000.000	-	0	-	0	-	1	-	1	0	0	0	-	-
100217820|F|0--12:C>A	100217820	43455	TGCAGGGGAAAGCAAAGCATGAGATCGGAAGAGCGGTTCAGCAGGAATGCCGAGACCGATCTCGTATGC	TGCAGGGRAAAGMWAAGCATGAGATCGGAAGAGCGGTTCAGCAGGAATGCCGAGACCGATCTCGTATGC	3	2		12	0.437500	0.142857	0.857143	0.142857	0.857143	0.000000	0.244898	0.244898	0.244898	2.750.000	1.363.636	201.667	-0.142857	-0.10800	3	-0.01124	1.000.000	1.000.000	1.000.000	1.000.000	1.000.000	1.000.000	1.000.000	-	0	-	0	-	0	-	0	0	1	0	-	-
100217820|F|0-12:C>A-12:C>A	100217820	43455	TGCAGGGGAAAGATAAGCATGAGATCGGAAGAGCGGTTCAGCAGGAATGCCGAGACCGATCTCGTATGC	TGCAGGGRAAAGMWAAGCATGAGATCGGAAGAGCGGTTCAGCAGGAATGCCGAGACCGATCTCGTATGC	3	2	12:C>A	12	0.437500	0.142857	0.857143	0.142857	0.857143	0.000000	0.244898	0.244898	0.244898	2.750.000	1.363.636	201.667	-0.142857	-0.10800	3	-0.01124	1.000.000	1.000.000	1.000.000	1.000.000	1.000.000	1.000.000	1.000.000	-	1	-	1	-	1	-	1	1	0	1	-	-
100217829|F|0--7:A>C	100217829	43460	TGCAGTCACCTCTGAGGCATGAGATCGGAAGAGCGGTTCAGCAGGAATGCCGAGACCGATCTCGTATGC	TGCAGTCMCMTCTGARGCATGAGATCGGAAGAGCGGTTCAGCAGGAATGCCGAGACCGATCTCGTATGC	3	2		7	0.500000	0.250000	0.750000	0.250000	0.750000	0.000000	0.375000	0.375000	0.375000	10.325.000	6.775.000	152.399	-0.250000	-0.25413	2	0.00000	1.000.000	1.000.000	1.000.000	1.000.000	1.000.000	2.000.000	2.000.000	1	0	1	0	-	0	-	0	0	-	0	-	-
100217829|F|0-7:A>C-7:A>C	100217829	43460	TGCAGTCCCATCTGAGGCATGAGATCGGAAGAGCGGTTCAGCAGGAATGCCGAGACCGATCTCGTATGC	TGCAGTCMCMTCTGARGCATGAGATCGGAAGAGCGGTTCAGCAGGAATGCCGAGACCGATCTCGTATGC	3	2	7:A>C	7	0.500000	0.250000	0.750000	0.250000	0.750000	0.000000	0.375000	0.375000	0.375000	10.325.000	6.775.000	152.399	-0.250000	-0.25413	2	0.00000	1.000.000	1.000.000	1.000.000	1.000.000	1.000.000	2.000.000	2.000.000	0	1	0	1	-	1	-	1	1	-	1	-	-
100217829|F|0--15:G>A	100217829	43460	TGCAGTCACCTCTGAGGCATGAGATCGGAAGAGCGGTTCAGCAGGAATGCCGAGACCGATCTCGTATGC	TGCAGTCMCMTCTGARGCATGAGATCGGAAGAGCGGTTCAGCAGGAATGCCGAGACCGATCTCGTATGC	3	1		15	0.500000	0.250000	0.750000	0.250000	0.750000	0.000000	0.375000	0.375000	0.375000	10.325.000	5.333.333	193.594	-0.250000	-0.24628	2	0.00000	1.000.000	1.000.000	1.000.000	1.000.000	1.000.000	2.000.000	2.000.000	1	0	1	0	-	0	-	0	0	-	0	-	-
100217829|F|0-15:G>A-15:G>A	100217829	43460	TGCAGTCACCTCTGAAGCATGAGATCGGAAGAGCGGTTCAGCAGGAATGCCGAGACCGATCTCGTATGC	TGCAGTCMCMTCTGARGCATGAGATCGGAAGAGCGGTTCAGCAGGAATGCCGAGACCGATCTCGTATGC	3	1	15:G>A	15	0.500000	0.250000	0.750000	0.250000	0.750000	0.000000	0.375000	0.375000	0.375000	10.325.000	5.333.333	193.594	-0.250000	-0.24628	2	0.00000	1.000.000	1.000.000	1.000.000	1.000.000	1.000.000	2.000.000	2.000.000	0	1	0	1	-	1	-	1	1	-	1	-	-
100217834|F|0--9:G>T	100217834	43463	TGCAGTTAGGACCCCCGCATGAGATCGGAAGAGCGGTTCAGCAGGAATGCCGAGACCGATCTCGTATGC	TGCAGTTAGKACYCCYGCATGAGATCGGAAGAGCGGTTCAGCAGGAATGCCGAGACCGATCTCGTATGC	3	3		9	0.500000	0.250000	0.750000	0.250000	0.750000	0.000000	0.375000	0.375000	0.375000	6.150.000	1.891.667	325.110	-0.250000	-0.21545	3	-0.03703	1.000.000	1.000.000	1.000.000	1.000.000	1.000.000	2.000.000	2.000.000	-	0	-	0	-	0	-	0	0	-	0	-	-
100217834|F|0-9:G>T-9:G>T	100217834	43463	TGCAGTTAGTACTCCTGCATGAGATCGGAAGAGCGGTTCAGCAGGAATGCCGAGACCGATCTCGTATGC	TGCAGTTAGKACYCCYGCATGAGATCGGAAGAGCGGTTCAGCAGGAATGCCGAGACCGATCTCGTATGC	3	3	9:G>T	9	0.500000	0.250000	0.750000	0.250000	0.750000	0.000000	0.375000	0.375000	0.375000	6.150.000	1.891.667	325.110	-0.250000	-0.21545	3	-0.03703	1.000.000	1.000.000	1.000.000	1.000.000	1.000.000	2.000.000	2.000.000	-	1	-	1	-	1	-	1	1	-	1	-	-
100217835|F|0--12:C>T	100217835	43463	TGCAGTTAGTACCCCTGCATGAGATCGGAAGAGCGGTTCAGCAGGAATGCCGAGACCGATCTCGTATGC	TGCAGTTAGKACYCCYGCATGAGATCGGAAGAGCGGTTCAGCAGGAATGCCGAGACCGATCTCGTATGC	3	1		12	0.500000	0.500000	0.500000	0.500000	0.500000	0.000000	0.500000	0.500000	0.500000	4.137.500	1.775.000	233.099	-0.500000	-0.23146	3	-0.07610	1.000.000	1.000.000	1.000.000	1.000.000	1.000.000	4.000.000	4.000.000	-	0	-	0	-	1	-	1	0	-	0	-	-
100217835|F|0-12:C>T-12:C>T	100217835	43463	TGCAGTTAGTACTCCTGCATGAGATCGGAAGAGCGGTTCAGCAGGAATGCCGAGACCGATCTCGTATGC	TGCAGTTAGKACYCCYGCATGAGATCGGAAGAGCGGTTCAGCAGGAATGCCGAGACCGATCTCGTATGC	3	1	12:C>T	12	0.500000	0.500000	0.500000	0.500000	0.500000	0.000000	0.500000	0.500000	0.500000	4.137.500	1.775.000	233.099	-0.500000	-0.23146	3	-0.07610	1.000.000	1.000.000	1.000.000	1.000.000	1.000.000	4.000.000	4.000.000	-	1	-	1	-	0	-	0	1	-	1	-	-
100217840|F|0--11:C>A	100217840	43467	TGCAGTGCCTGCAACACGCATGAGATCGGAAGAGCGGTTCAGCAGGAATGCCGAGACCGATCTCGTATG	TGCAGTGCCTGMRRSACGCATGAGATCGGAAGAGCGGTTCAGCAGGAATGCCGAGACCGATCTCGTATG	3	4		11	0.437500	0.285714	0.714286	0.285714	0.714286	0.000000	0.408163	0.408163	0.408163	7.725.000	5.644.444	136.860	-0.285714	-0.19267	3	-0.04601	1.000.000	1.000.000	1.000.000	1.000.000	1.000.000	2.000.000	2.000.000	0	1	0	1	-	0	0	0	-	-	-	-	-
100217840|F|0-11:C>A-11:C>A	100217840	43467	TGCAGTGCCTGAGGGACGCATGAGATCGGAAGAGCGGTTCAGCAGGAATGCCGAGACCGATCTCGTATG	TGCAGTGCCTGMRRSACGCATGAGATCGGAAGAGCGGTTCAGCAGGAATGCCGAGACCGATCTCGTATG	3	4	11:C>A	11	0.437500	0.285714	0.714286	0.285714	0.714286	0.000000	0.408163	0.408163	0.408163	7.725.000	5.644.444	136.860	-0.285714	-0.19267	3	-0.04601	1.000.000	1.000.000	1.000.000	1.000.000	1.000.000	2.000.000	2.000.000	1	0	1	0	-	1	1	1	-	-	-	-	-
100217909|F|0--6:C>A	100217909	43509	TGCAGGCGAGCACATGCATGAGATCGGAAGAGCGGTTCAGCAGGAATGCCGAGACCGATCTCGTATGCC	TGCAGGMGARCACATGCATGAGATCGGAAGAGCGGTTCAGCAGGAATGCCGAGACCGATCTCGTATGCC	3	1		6	0.625000	0.800000	0.200000	0.800000	0.200000	0.000000	0.320000	0.320000	0.320000	9.212.500	6.125.000	150.408	-0.200000	-0.28636	3	-0.07130	1.000.000	1.000.000	1.000.000	1.000.000	1.000.000	2.000.000	2.000.000	-	1	-	1	0	1	0	1	1	-	1	1	1
100217909|F|0-6:C>A-6:C>A	100217909	43509	TGCAGGAGAGCACATGCATGAGATCGGAAGAGCGGTTCAGCAGGAATGCCGAGACCGATCTCGTATGCC	TGCAGGMGARCACATGCATGAGATCGGAAGAGCGGTTCAGCAGGAATGCCGAGACCGATCTCGTATGCC	3	1	6:C>A	6	0.625000	0.800000	0.200000	0.800000	0.200000	0.000000	0.320000	0.320000	0.320000	9.212.500	6.125.000	150.408	-0.200000	-0.28636	3	-0.07130	1.000.000	1.000.000	1.000.000	1.000.000	1.000.000	2.000.000	2.000.000	-	0	-	0	1	0	1	0	0	-	0	0	0
100217910|F|0--9:A>G	100217910	43509	TGCAGGCGAACACATGCATGAGATCGGAAGAGCGGTTCAGCAGGAATGCCGAGACCGATCTCGTATGCC	TGCAGGMGARCACATGCATGAGATCGGAAGAGCGGTTCAGCAGGAATGCCGAGACCGATCTCGTATGCC	3	1		9	0.625000	0.200000	0.800000	0.200000	0.800000	0.000000	0.320000	0.320000	0.320000	14.750.000	7.056.250	209.035	-0.200000	-0.27940	3	-0.06095	1.000.000	1.000.000	1.000.000	1.000.000	1.000.000	2.000.000	2.000.000	-	1	-	1	0	0	0	0	0	-	0	0	0
100217910|F|0-9:A>G-9:A>G	100217910	43509	TGCAGGCGAGCACATGCATGAGATCGGAAGAGCGGTTCAGCAGGAATGCCGAGACCGATCTCGTATGCC	TGCAGGMGARCACATGCATGAGATCGGAAGAGCGGTTCAGCAGGAATGCCGAGACCGATCTCGTATGCC	3	1	9:A>G	9	0.625000	0.200000	0.800000	0.200000	0.800000	0.000000	0.320000	0.320000	0.320000	14.750.000	7.056.250	209.035	-0.200000	-0.27940	3	-0.06095	1.000.000	1.000.000	1.000.000	1.000.000	1.000.000	2.000.000	2.000.000	-	0	-	0	1	1	1	1	1	-	1	1	1
100217920|F|0--10:G>C	100217920	43515	TGCAGATGCAGAGATGCATGAGATCGGAAGAGCGGTTCAGCAGGAATGCCGAGACCGATCTCGTATGCC	TGCAGATGCASAKATGCATGAGATCGGAAGAGCGGTTCAGCAGGAATGCCGAGACCGATCTCGTATGCC	3	1		10	0.562500	0.888889	0.111111	0.888889	0.111111	0.000000	0.197531	0.197531	0.197531	1.366.667	700.000	195.238	-0.111111	-0.13509	3	-0.00751	1.000.000	1.000.000	1.000.000	1.000.000	1.000.000	1.000.000	1.000.000	-	1	-	1	1	1	1	1	1	0	1	-	-
100217920|F|0-10:G>C-10:G>C	100217920	43515	TGCAGATGCACAGATGCATGAGATCGGAAGAGCGGTTCAGCAGGAATGCCGAGACCGATCTCGTATGCC	TGCAGATGCASAKATGCATGAGATCGGAAGAGCGGTTCAGCAGGAATGCCGAGACCGATCTCGTATGCC	3	1	10:G>C	10	0.562500	0.888889	0.111111	0.888889	0.111111	0.000000	0.197531	0.197531	0.197531	1.366.667	700.000	195.238	-0.111111	-0.13509	3	-0.00751	1.000.000	1.000.000	1.000.000	1.000.000	1.000.000	1.000.000	1.000.000	-	0	-	0	0	0	0	0	0	1	0	-	-
100217920|F|0--12:G>T	100217920	43515	TGCAGATGCAGAGATGCATGAGATCGGAAGAGCGGTTCAGCAGGAATGCCGAGACCGATCTCGTATGCC	TGCAGATGCASAKATGCATGAGATCGGAAGAGCGGTTCAGCAGGAATGCCGAGACCGATCTCGTATGCC	3	1		12	0.562500	0.777778	0.333333	0.666667	0.222222	0.111111	0.345679	0.444444	0.395062	1.500.000	225.000	666.667	-0.111111	-0.19909	3	-0.01629	1.000.000	0.875000	0.937500	1.000.000	0.500000	1.000.000	2.000.000	-	1	-	1	0	1	0	1	1	1	1	-	-
100217920|F|0-12:G>T-12:G>T	100217920	43515	TGCAGATGCAGATATGCATGAGATCGGAAGAGCGGTTCAGCAGGAATGCCGAGACCGATCTCGTATGCC	TGCAGATGCASAKATGCATGAGATCGGAAGAGCGGTTCAGCAGGAATGCCGAGACCGATCTCGTATGCC	3	1	12:G>T	12	0.562500	0.777778	0.333333	0.666667	0.222222	0.111111	0.345679	0.444444	0.395062	1.500.000	225.000	666.667	-0.111111	-0.19909	3	-0.01629	1.000.000	0.875000	0.937500	1.000.000	0.500000	1.000.000	2.000.000	-	0	-	0	1	0	1	1	0	0	0	-	-
100217946|F|0--8:G>C	100217946	43535	TGCAGCCTGTCCACATGCATGAGATCGGAAGAGCGGTTCAGCAGGAATGCCGAGACCGATCTCGTATGC	TGCAGCMTSTCCACATGCATGAGATCGGAAGAGCGGTTCAGCAGGAATGCCGAGACCGATCTCGTATGC	3	1		8	0.500000	0.500000	0.750000	0.250000	0.500000	0.250000	0.500000	0.375000	0.437500	3.800.000	3.790.000	100.264	0.000000	-0.19727	3	-0.00181	1.000.000	1.000.000	1.000.000	1.000.000	1.000.000	2.000.000	2.000.000	-	0	-	0	-	0	-	0	1	-	1	1	1
100217946|F|0-8:G>C-8:G>C	100217946	43535	TGCAGCCTCTCCACATGCATGAGATCGGAAGAGCGGTTCAGCAGGAATGCCGAGACCGATCTCGTATGC	TGCAGCMTSTCCACATGCATGAGATCGGAAGAGCGGTTCAGCAGGAATGCCGAGACCGATCTCGTATGC	3	1	8:G>C	8	0.500000	0.500000	0.750000	0.250000	0.500000	0.250000	0.500000	0.375000	0.437500	3.800.000	3.790.000	100.264	0.000000	-0.19727	3	-0.00181	1.000.000	1.000.000	1.000.000	1.000.000	1.000.000	2.000.000	2.000.000	-	1	-	1	-	1	-	1	0	-	0	1	1
100217949|F|0--8:G>C	100217949	43537	TGCAGGCTGGGTGGAGCATGAGATCGGAAGAGCGGTTCAGCAGGAATGCCGAGACCGATCTCGTATGCC	TGCAGGCTSGGYGGAGCATGAGATCGGAAGAGCGGTTCAGCAGGAATGCCGAGACCGATCTCGTATGCC	3	2		8	0.500000	0.250000	0.750000	0.250000	0.750000	0.000000	0.375000	0.375000	0.375000	10.675.000	6.525.000	163.602	-0.250000	-0.24239	3	-0.06463	1.000.000	1.000.000	1.000.000	1.000.000	1.000.000	2.000.000	2.000.000	-	0	-	0	-	0	-	0	0	-	0	-	-
100217949|F|0-8:G>C-8:G>C	100217949	43537	TGCAGGCTCGGCGGAGCATGAGATCGGAAGAGCGGTTCAGCAGGAATGCCGAGACCGATCTCGTATGCC	TGCAGGCTSGGYGGAGCATGAGATCGGAAGAGCGGTTCAGCAGGAATGCCGAGACCGATCTCGTATGCC	3	2	8:G>C	8	0.500000	0.250000	0.750000	0.250000	0.750000	0.000000	0.375000	0.375000	0.375000	10.675.000	6.525.000	163.602	-0.250000	-0.24239	3	-0.06463	1.000.000	1.000.000	1.000.000	1.000.000	1.000.000	2.000.000	2.000.000	-	1	-	1	-	1	-	1	1	-	1	-	-
100217950|F|0--11:T>C	100217950	43537	TGCAGGCTCGGTGGAGCATGAGATCGGAAGAGCGGTTCAGCAGGAATGCCGAGACCGATCTCGTATGCC	TGCAGGCTSGGYGGAGCATGAGATCGGAAGAGCGGTTCAGCAGGAATGCCGAGACCGATCTCGTATGCC	3	1		11	0.500000	0.500000	0.500000	0.500000	0.500000	0.000000	0.500000	0.500000	0.500000	8.587.500	6.537.500	131.358	-0.500000	-0.26192	3	-0.07821	1.000.000	1.000.000	1.000.000	1.000.000	1.000.000	4.000.000	4.000.000	-	0	-	0	-	0	-	0	1	-	1	-	-
100217950|F|0-11:T>C-11:T>C	100217950	43537	TGCAGGCTCGGCGGAGCATGAGATCGGAAGAGCGGTTCAGCAGGAATGCCGAGACCGATCTCGTATGCC	TGCAGGCTSGGYGGAGCATGAGATCGGAAGAGCGGTTCAGCAGGAATGCCGAGACCGATCTCGTATGCC	3	1	11:T>C	11	0.500000	0.500000	0.500000	0.500000	0.500000	0.000000	0.500000	0.500000	0.500000	8.587.500	6.537.500	131.358	-0.500000	-0.26192	3	-0.07821	1.000.000	1.000.000	1.000.000	1.000.000	1.000.000	4.000.000	4.000.000	-	1	-	1	-	1	-	1	0	-	0	-	-
100217996|F|0--14:G>T	100217996	43571	TGCAGCATGAGATCGGAAGAGCGGTTCAGCAGGAATGCCGAGACCGATCTCGTATGCCGTCTTCTGCTT	TGCAGCMTGAGATCKGMAGAGCGGTTCAGCAGGAATGCCGAGACCGATCTCGTATGCCGTCTTCTGCTT	4	1		14	1.000.000	1.000.000	0.062500	0.937500	0.000000	0.062500	0.000000	0.117188	0.058594	3.974.194	300.000	1.324.731	0.062500	0.48026	4	0.02585	1.000.000	0.928571	0.964286	1.000.000	0.000000	0.000000	1.000.000	1	1	1	1	1	1	1	1	1	1	1	1	1
100217996|F|0-14:G>T-14:G>T	100217996	43571	TGCAGCATGAGATCTGAAGAGCGGTTCAGCAGGAATGCCGAGACCGATCTCGTATGCCGTCTTCTGCTT	TGCAGCMTGAGATCKGMAGAGCGGTTCAGCAGGAATGCCGAGACCGATCTCGTATGCCGTCTTCTGCTT	4	1	14:G>T	14	1.000.000	1.000.000	0.062500	0.937500	0.000000	0.062500	0.000000	0.117188	0.058594	3.974.194	300.000	1.324.731	0.062500	0.48026	4	0.02585	1.000.000	0.928571	0.964286	1.000.000	0.000000	0.000000	1.000.000	0	0	0	0	0	0	0	0	0	0	1	0	0
100217996|F|0--16:A>C	100217996	43571	TGCAGCATGAGATCGGAAGAGCGGTTCAGCAGGAATGCCGAGACCGATCTCGTATGCCGTCTTCTGCTT	TGCAGCMTGAGATCKGMAGAGCGGTTCAGCAGGAATGCCGAGACCGATCTCGTATGCCGTCTTCTGCTT	4	1		16	1.000.000	1.000.000	0.062500	0.937500	0.000000	0.062500	0.000000	0.117188	0.058594	3.970.968	400.000	992.742	0.062500	0.47692	4	0.02251	1.000.000	0.928571	0.964286	1.000.000	0.000000	0.000000	1.000.000	1	1	1	1	1	1	1	1	1	1	1	1	1
100217996|F|0-16:A>C-16:A>C	100217996	43571	TGCAGCATGAGATCGGCAGAGCGGTTCAGCAGGAATGCCGAGACCGATCTCGTATGCCGTCTTCTGCTT	TGCAGCMTGAGATCKGMAGAGCGGTTCAGCAGGAATGCCGAGACCGATCTCGTATGCCGTCTTCTGCTT	4	1	16:A>C	16	1.000.000	1.000.000	0.062500	0.937500	0.000000	0.062500	0.000000	0.117188	0.058594	3.970.968	400.000	992.742	0.062500	0.47692	4	0.02251	1.000.000	0.928571	0.964286	1.000.000	0.000000	0.000000	1.000.000	0	0	0	0	0	0	0	0	0	0	1	0	0
100218026|F|0--34:G>A	100218026	43586	TGCAGGGGTAATAATCAGTCGTCAGGTCCCATCTGGACAGGGAAGAGCTCAGTCTGAGTTCATGACGCA	TGCAGGGGTAATAATCAGTCGTCAGGTCCCATCTRGACAGRSAAGAGCTYAGKCTGAGTTCATGACGCA	4	5		34	0.437500	0.857143	0.142857	0.857143	0.142857	0.000000	0.244898	0.244898	0.244898	2.383.333	1.800.000	132.407	-0.142857	-0.13193	3	-0.02142	1.000.000	1.000.000	1.000.000	1.000.000	1.000.000	1.000.000	1.000.000	-	1	-	1	-	1	-	1	1	0	1	-	-
100218026|F|0-34:G>A-34:G>A	100218026	43586	TGCAGGGGTAATAATCAGTCGTCAGGTCCCATCTAGACAGACAAGAGCTTAGGCTGAGTTCATGACGCA	TGCAGGGGTAATAATCAGTCGTCAGGTCCCATCTRGACAGRSAAGAGCTYAGKCTGAGTTCATGACGCA	4	5	34:G>A	34	0.437500	0.857143	0.142857	0.857143	0.142857	0.000000	0.244898	0.244898	0.244898	2.383.333	1.800.000	132.407	-0.142857	-0.13193	3	-0.02142	1.000.000	1.000.000	1.000.000	1.000.000	1.000.000	1.000.000	1.000.000	-	0	-	0	-	0	-	0	0	1	0	-	-
100218026|F|0--40:G>A	100218026	43586	TGCAGGGGTAATAATCAGTCGTCAGGTCCCATCTGGACAGGGAAGAGCTCAGTCTGAGTTCATGACGCA	TGCAGGGGTAATAATCAGTCGTCAGGTCCCATCTRGACAGRSAAGAGCTYAGKCTGAGTTCATGACGCA	4	4		40	0.437500	0.571429	0.428571	0.571429	0.428571	0.000000	0.489796	0.489796	0.489796	2.937.500	1.720.000	170.785	-0.428571	-0.18236	3	-0.04222	1.000.000	1.000.000	1.000.000	1.000.000	1.000.000	2.000.000	2.000.000	-	1	-	1	-	-	-	-	1	0	1	0	0
100218026|F|0-40:G>A-40:G>A	100218026	43586	TGCAGGGGTAATAATCAGTCGTCAGGTCCCATCTGGACAGACAAGAGCTTAGGCTGAGTTCATGACGCA	TGCAGGGGTAATAATCAGTCGTCAGGTCCCATCTRGACAGRSAAGAGCTYAGKCTGAGTTCATGACGCA	4	4	40:G>A	40	0.437500	0.571429	0.428571	0.571429	0.428571	0.000000	0.489796	0.489796	0.489796	2.937.500	1.720.000	170.785	-0.428571	-0.18236	3	-0.04222	1.000.000	1.000.000	1.000.000	1.000.000	1.000.000	2.000.000	2.000.000	-	0	-	0	-	-	-	-	0	1	0	1	1
100218030|F|0--43:G>A	100218030	43588	TGCAGATAACCATTAACCCAACTCACGGCAAGTAAAATGGGAGGGAGAGAAGAGCGATAACCTTGAAAT	TGCAGATAACCATTAACCYAACTCACGGCAAGTAAAATGGGAGRGAGAGRAGAGCGATAACCTTGAAAT	4	2		43	0.562500	0.444444	0.555556	0.444444	0.555556	0.000000	0.493827	0.493827	0.493827	1.487.500	1.337.500	111.215	-0.444444	-0.25039	4	-0.11993	1.000.000	1.000.000	1.000.000	1.000.000	1.000.000	4.000.000	2.000.000	-	1	-	1	-	0	-	0	1	0	1	0	0
100218030|F|0-43:G>A-43:G>A	100218030	43588	TGCAGATAACCATTAACCCAACTCACGGCAAGTAAAATGGGAGAGAGAGGAGAGCGATAACCTTGAAAT	TGCAGATAACCATTAACCYAACTCACGGCAAGTAAAATGGGAGRGAGAGRAGAGCGATAACCTTGAAAT	4	2	43:G>A	43	0.562500	0.444444	0.555556	0.444444	0.555556	0.000000	0.493827	0.493827	0.493827	1.487.500	1.337.500	111.215	-0.444444	-0.25039	4	-0.11993	1.000.000	1.000.000	1.000.000	1.000.000	1.000.000	4.000.000	2.000.000	-	0	-	0	-	1	-	1	0	1	0	1	1
100218036|F|0--10:G>A	100218036	43590	TGCAGTGCTCGTGGCTCTTTCTCATGTCCTTCAGCCTGGGCTGGAGGTCCTACCAGCAGTCAAACGGAA	TGCAGTGCTCDTGGCTCTTYMTCATGTCCTTCAGYCTGGGCTGGAGGTCSTACCAGCAGTCAAACGGAA	4	3		10	0.437500	0.857143	0.142857	0.857143	0.142857	0.000000	0.244898	0.244898	0.244898	3.100.000	2.150.000	144.186	-0.142857	-0.13065	3	-0.02177	1.000.000	1.000.000	1.000.000	1.000.000	1.000.000	1.000.000	1.000.000	-	1	-	1	-	1	-	1	1	0	1	-	-
100218036|F|0-10:G>A-10:G>A	100218036	43590	TGCAGTGCTCATGGCTCTTCCTCATGTCCTTCAGCCTGGGCTGGAGGTCGTACCAGCAGTCAAACGGAA	TGCAGTGCTCDTGGCTCTTYMTCATGTCCTTCAGYCTGGGCTGGAGGTCSTACCAGCAGTCAAACGGAA	4	3	10:G>A	10	0.437500	0.857143	0.142857	0.857143	0.142857	0.000000	0.244898	0.244898	0.244898	3.100.000	2.150.000	144.186	-0.142857	-0.13065	3	-0.02177	1.000.000	1.000.000	1.000.000	1.000.000	1.000.000	1.000.000	1.000.000	-	0	-	0	-	0	-	0	0	1	0	-	-
100218037|F|0--19:C>T	100218037	43590	TGCAGTGCTCTTGGCTCTTCCTCATGTCCTTCAGTCTGGGCTGGAGGTCCTACCAGCAGTCAAACGGAA	TGCAGTGCTCDTGGCTCTTYMTCATGTCCTTCAGYCTGGGCTGGAGGTCSTACCAGCAGTCAAACGGAA	4	3		19	0.562500	0.333333	0.666667	0.333333	0.666667	0.000000	0.444444	0.444444	0.444444	3.175.000	3.100.000	102.419	-0.333333	-0.21885	4	-0.07735	1.000.000	1.000.000	1.000.000	1.000.000	1.000.000	1.000.000	1.000.000	-	0	-	0	-	0	-	0	0	1	0	1	1
100218037|F|0-19:C>T-19:C>T	100218037	43590	TGCAGTGCTCGTGGCTCTTTCTCATGTCCTTCAGCCTGGGCTGGAGGTCCTACCAGCAGTCAAACGGAA	TGCAGTGCTCDTGGCTCTTYMTCATGTCCTTCAGYCTGGGCTGGAGGTCSTACCAGCAGTCAAACGGAA	4	3	19:C>T	19	0.562500	0.333333	0.666667	0.333333	0.666667	0.000000	0.444444	0.444444	0.444444	3.175.000	3.100.000	102.419	-0.333333	-0.21885	4	-0.07735	1.000.000	1.000.000	1.000.000	1.000.000	1.000.000	1.000.000	1.000.000	-	1	-	1	-	1	-	1	1	0	1	0	0
100218036|F|0--20:C>A	100218036	43590	TGCAGTGCTCGTGGCTCTTTCTCATGTCCTTCAGCCTGGGCTGGAGGTCCTACCAGCAGTCAAACGGAA	TGCAGTGCTCDTGGCTCTTYMTCATGTCCTTCAGYCTGGGCTGGAGGTCSTACCAGCAGTCAAACGGAA	4	1		20	0.562500	0.777778	0.222222	0.777778	0.222222	0.000000	0.345679	0.345679	0.345679	3.500.000	1.975.000	177.215	-0.222222	-0.19775	4	-0.04237	1.000.000	1.000.000	1.000.000	1.000.000	1.000.000	2.000.000	2.000.000	-	1	-	1	-	0	-	0	1	1	1	1	1
100218036|F|0-20:C>A-20:C>A	100218036	43590	TGCAGTGCTCGTGGCTCTTTATCATGTCCTTCAGCCTGGGCTGGAGGTCCTACCAGCAGTCAAACGGAA	TGCAGTGCTCDTGGCTCTTYMTCATGTCCTTCAGYCTGGGCTGGAGGTCSTACCAGCAGTCAAACGGAA	4	1	20:C>A	20	0.562500	0.777778	0.222222	0.777778	0.222222	0.000000	0.345679	0.345679	0.345679	3.500.000	1.975.000	177.215	-0.222222	-0.19775	4	-0.04237	1.000.000	1.000.000	1.000.000	1.000.000	1.000.000	2.000.000	2.000.000	-	0	-	0	-	1	-	1	0	0	0	0	0
100218041|F|0--27:C>A	100218041	43592	TGCAGAACAAATGGTGTTAATTTGCAGCGCGGCTCTGAAGCTGCACATTAGAGTGGAGCCTTCAGGGAG	TGCAGAACAAATGGTGTTAATTTGCAGMGYGKCTCTGAAGCTGCACATTAGAGWSGAGCCTTCRGGGAG	4	3		27	0.562500	0.888889	0.111111	0.888889	0.111111	0.000000	0.197531	0.197531	0.197531	1.107.143	800.000	138.393	-0.111111	-0.14648	3	-0.03448	1.000.000	1.000.000	1.000.000	1.000.000	1.000.000	0.000000	0.000000	-	1	-	1	-	1	-	1	1	0	1	-	-
100218041|F|0-27:C>A-27:C>A	100218041	43592	TGCAGAACAAATGGTGTTAATTTGCAGAGCGGCTCTGAAGCTGCACATTAGAGAGGAGCCTTCGGGGAG	TGCAGAACAAATGGTGTTAATTTGCAGMGYGKCTCTGAAGCTGCACATTAGAGWSGAGCCTTCRGGGAG	4	3	27:C>A	27	0.562500	0.888889	0.111111	0.888889	0.111111	0.000000	0.197531	0.197531	0.197531	1.107.143	800.000	138.393	-0.111111	-0.14648	3	-0.03448	1.000.000	1.000.000	1.000.000	1.000.000	1.000.000	0.000000	0.000000	-	0	-	0	-	0	-	0	0	1	0	-	-
100218042|F|0--29:T>C	100218042	43592	TGCAGAACAAATGGTGTTAATTTGCAGCGTGTCTCTGAAGCTGCACATTAGAGACGAGCCTTCAGGGAG	TGCAGAACAAATGGTGTTAATTTGCAGMGYGKCTCTGAAGCTGCACATTAGAGWSGAGCCTTCRGGGAG	4	4		29	0.687500	0.363636	0.636364	0.363636	0.636364	0.000000	0.462810	0.462810	0.462810	1.266.667	1.018.182	124.405	-0.363636	-0.30444	4	-0.07860	1.000.000	1.000.000	1.000.000	1.000.000	1.000.000	2.000.000	2.000.000	-	0	-	0	-	0	-	0	0	0	0	1	1
100218042|F|0-29:T>C-29:T>C	100218042	43592	TGCAGAACAAATGGTGTTAATTTGCAGCGCGGCTCTGAAGCTGCACATTAGAGTGGAGCCTTCAGGGAG	TGCAGAACAAATGGTGTTAATTTGCAGMGYGKCTCTGAAGCTGCACATTAGAGWSGAGCCTTCRGGGAG	4	4	29:T>C	29	0.687500	0.363636	0.636364	0.363636	0.636364	0.000000	0.462810	0.462810	0.462810	1.266.667	1.018.182	124.405	-0.363636	-0.30444	4	-0.07860	1.000.000	1.000.000	1.000.000	1.000.000	1.000.000	2.000.000	2.000.000	-	1	-	1	-	1	-	1	1	1	1	0	0
100218071|F|0--10:A>G	100218071	43601	TGCAGATTGCAGCGTATCAGCATTCTTCAGCGCGAGCCAGCACCTGATTGGAAAGCCATGGACTGGTGG	TGCAGATTGCRGCGTATCAGCATTCTTCRGCGCGAGCCAGCACCTGATTGSWAMGCCATGGACTGGTGG	4	2		10	0.562500	0.222222	0.777778	0.222222	0.777778	0.000000	0.345679	0.345679	0.345679	950.000	718.182	132.278	-0.222222	-0.23830	4	-0.05295	1.000.000	1.000.000	1.000.000	1.000.000	1.000.000	2.000.000	2.000.000	-	0	-	0	-	0	-	0	1	0	1	0	0
100218071|F|0-10:A>G-10:A>G	100218071	43601	TGCAGATTGCGGCGTATCAGCATTCTTCAGCGCGAGCCAGCACCTGATTGGAACGCCATGGACTGGTGG	TGCAGATTGCRGCGTATCAGCATTCTTCRGCGCGAGCCAGCACCTGATTGSWAMGCCATGGACTGGTGG	4	2	10:A>G	10	0.562500	0.222222	0.777778	0.222222	0.777778	0.000000	0.345679	0.345679	0.345679	950.000	718.182	132.278	-0.222222	-0.23830	4	-0.05295	1.000.000	1.000.000	1.000.000	1.000.000	1.000.000	2.000.000	2.000.000	-	1	-	1	-	1	-	1	0	1	0	1	1
100218072|F|0--28:G>A	100218072	43601	TGCAGATTGCGGCGTATCAGCATTCTTCGGCGCGAGCCAGCACCTGATTGCTACGCCATGGACTGGTGG	TGCAGATTGCRGCGTATCAGCATTCTTCRGCGCGAGCCAGCACCTGATTGSWAMGCCATGGACTGGTGG	4	3		28	0.500000	0.250000	0.750000	0.250000	0.750000	0.000000	0.375000	0.375000	0.375000	800.000	791.667	101.053	-0.250000	-0.18026	3	-0.04848	1.000.000	1.000.000	1.000.000	1.000.000	1.000.000	0.000000	0.000000	-	0	-	0	-	0	-	0	0	-	0	1	1
100218072|F|0-28:G>A-28:G>A	100218072	43601	TGCAGATTGCGGCGTATCAGCATTCTTCAGCGCGAGCCAGCACCTGATTGGAACGCCATGGACTGGTGG	TGCAGATTGCRGCGTATCAGCATTCTTCRGCGCGAGCCAGCACCTGATTGSWAMGCCATGGACTGGTGG	4	3	28:G>A	28	0.500000	0.250000	0.750000	0.250000	0.750000	0.000000	0.375000	0.375000	0.375000	800.000	791.667	101.053	-0.250000	-0.18026	3	-0.04848	1.000.000	1.000.000	1.000.000	1.000.000	1.000.000	0.000000	0.000000	-	1	-	1	-	1	-	1	1	-	1	0	0
100218074|F|0--26:G>A	100218074	43602	TGCAGCAAATGTGCCGAGTTGGAGGAGGAGCTGAAAAATGTCACCAATAACTTAAAATCCTTGGAGGCC	TGCAGCAAATGTGCCGAGTTGGAGGARGARCTGAAAAATGTCACCAATAACTTAAAATCCYTGGAGGCC	4	2		26	0.750000	0.666667	0.333333	0.666667	0.333333	0.000000	0.444444	0.444444	0.444444	730.769	483.333	151.194	-0.333333	-0.24639	4	-0.08330	1.000.000	1.000.000	1.000.000	1.000.000	1.000.000	2.000.000	2.000.000	0	1	0	1	1	1	1	1	1	-	1	0	0
100218074|F|0-26:G>A-26:G>A	100218074	43602	TGCAGCAAATGTGCCGAGTTGGAGGAAGAGCTGAAAAATGTCACCAATAACTTAAAATCCCTGGAGGCC	TGCAGCAAATGTGCCGAGTTGGAGGARGARCTGAAAAATGTCACCAATAACTTAAAATCCYTGGAGGCC	4	2	26:G>A	26	0.750000	0.666667	0.333333	0.666667	0.333333	0.000000	0.444444	0.444444	0.444444	730.769	483.333	151.194	-0.333333	-0.24639	4	-0.08330	1.000.000	1.000.000	1.000.000	1.000.000	1.000.000	2.000.000	2.000.000	1	0	1	0	0	0	0	0	0	-	0	1	1
100218081|F|0--14:T>G	100218081	43604	TGCAGCAGCTTGCGTGGGTCTTCACCGTCCAGCTGCAAGTCCTTTATGGAGCTGATAATTTGGGCATGA	TGCAGCAGCTTGCGKGGGTCYTCRCCRTCCAGCTGYAAGTCCTTTATGGAGCTGATAATTTGGGCATGA	4	4		14	0.562500	0.666667	0.333333	0.666667	0.333333	0.000000	0.444444	0.444444	0.444444	3.016.667	2.425.000	124.399	-0.333333	-0.22819	4	-0.08417	1.000.000	1.000.000	1.000.000	1.000.000	1.000.000	1.000.000	1.000.000	-	1	-	1	-	1	-	1	1	0	1	0	0
100218081|F|0-14:T>G-14:T>G	100218081	43604	TGCAGCAGCTTGCGGGGGTCTTCGCCATCCAGCTGTAAGTCCTTTATGGAGCTGATAATTTGGGCATGA	TGCAGCAGCTTGCGKGGGTCYTCRCCRTCCAGCTGYAAGTCCTTTATGGAGCTGATAATTTGGGCATGA	4	4	14:T>G	14	0.562500	0.666667	0.333333	0.666667	0.333333	0.000000	0.444444	0.444444	0.444444	3.016.667	2.425.000	124.399	-0.333333	-0.22819	4	-0.08417	1.000.000	1.000.000	1.000.000	1.000.000	1.000.000	1.000.000	1.000.000	-	0	-	0	-	0	-	0	0	1	0	1	1
100218084|F|0--5:C>A	100218084	43605	TGCAGCAGGTTGTTGCGGCTGCGCTCCTGCATGACATCGCCTTCCAGGCGCTCCACAGCACCGCGCATG	TGCAGMAGGTTGTTGCGGCTGCGCTCCTGCATSACRTCGCCYTCCAGGCGCTCCACRGCRCCGCGCATG	4	5		5	0.437500	0.857143	0.142857	0.857143	0.142857	0.000000	0.244898	0.244898	0.244898	2.066.667	1.200.000	172.222	-0.142857	-0.12870	3	-0.02237	1.000.000	1.000.000	1.000.000	1.000.000	1.000.000	1.000.000	1.000.000	-	1	-	1	-	1	-	1	1	0	1	-	-
100218084|F|0-5:C>A-5:C>A	100218084	43605	TGCAGAAGGTTGTTGCGGCTGCGCTCCTGCATCACGTCGCCCTCCAGGCGCTCCACGGCACCGCGCATG	TGCAGMAGGTTGTTGCGGCTGCGCTCCTGCATSACRTCGCCYTCCAGGCGCTCCACRGCRCCGCGCATG	4	5	5:C>A	5	0.437500	0.857143	0.142857	0.857143	0.142857	0.000000	0.244898	0.244898	0.244898	2.066.667	1.200.000	172.222	-0.142857	-0.12870	3	-0.02237	1.000.000	1.000.000	1.000.000	1.000.000	1.000.000	1.000.000	1.000.000	-	0	-	0	-	0	-	0	0	1	0	-	-
100218084|F|0--59:A>G	100218084	43605	TGCAGCAGGTTGTTGCGGCTGCGCTCCTGCATGACATCGCCTTCCAGGCGCTCCACAGCACCGCGCATG	TGCAGMAGGTTGTTGCGGCTGCGCTCCTGCATSACRTCGCCYTCCAGGCGCTCCACRGCRCCGCGCATG	4	1		59	0.562500	0.555556	0.444444	0.555556	0.444444	0.000000	0.493827	0.493827	0.493827	2.080.000	1.271.429	163.596	-0.444444	-0.22241	4	-0.06220	1.000.000	1.000.000	1.000.000	1.000.000	1.000.000	3.000.000	3.000.000	-	1	-	1	-	0	-	0	1	1	1	0	0
100218084|F|0-59:A>G-59:A>G	100218084	43605	TGCAGCAGGTTGTTGCGGCTGCGCTCCTGCATGACATCGCCTTCCAGGCGCTCCACAGCGCCGCGCATG	TGCAGMAGGTTGTTGCGGCTGCGCTCCTGCATSACRTCGCCYTCCAGGCGCTCCACRGCRCCGCGCATG	4	1	59:A>G	59	0.562500	0.555556	0.444444	0.555556	0.444444	0.000000	0.493827	0.493827	0.493827	2.080.000	1.271.429	163.596	-0.444444	-0.22241	4	-0.06220	1.000.000	1.000.000	1.000.000	1.000.000	1.000.000	3.000.000	3.000.000	-	0	-	0	-	1	-	1	0	0	0	1	1
100218087|F|0--45:G>A	100218087	43606	TGCAGCCAGAGGACATTAACTATGCATCCCAGCAACAAGTGTACAGAGACATTGGAGAGGAGATGCTGC	TGCAGCCMGAGGACATTAACTATGCATCCCAGCAACAAGTGTACARAGACATTGGRGAGGAGATGCTGC	4	1		45	0.500000	0.500000	0.500000	0.500000	0.500000	0.000000	0.500000	0.500000	0.500000	4.125.000	2.228.571	185.096	-0.500000	-0.22090	4	-0.05542	1.000.000	1.000.000	1.000.000	1.000.000	1.000.000	2.000.000	2.000.000	-	1	-	1	-	0	-	0	1	-	1	0	0
100218087|F|0-45:G>A-45:G>A	100218087	43606	TGCAGCCAGAGGACATTAACTATGCATCCCAGCAACAAGTGTACAAAGACATTGGAGAGGAGATGCTGC	TGCAGCCMGAGGACATTAACTATGCATCCCAGCAACAAGTGTACARAGACATTGGRGAGGAGATGCTGC	4	1	45:G>A	45	0.500000	0.500000	0.500000	0.500000	0.500000	0.000000	0.500000	0.500000	0.500000	4.125.000	2.228.571	185.096	-0.500000	-0.22090	4	-0.05542	1.000.000	1.000.000	1.000.000	1.000.000	1.000.000	2.000.000	2.000.000	-	0	-	0	-	1	-	1	0	-	0	1	1
100218092|F|0--10:A>G	100218092	43608	TGCAGCCCACATCGGAGTGCGGCGAGTGCATAATGAGGAACTCGTGCAGGTCGCCCTGGCTGAGGAACT	TGCAGCCCACRTCGGAGTGYGGYGAGTGCATRATGAGGAACTCGTGCAGGTCGCCCTGGYTGAGGAACT	4	4		10	0.500000	0.750000	0.250000	0.750000	0.250000	0.000000	0.375000	0.375000	0.375000	2.741.667	1.600.000	171.354	-0.250000	-0.17155	4	-0.09779	1.000.000	1.000.000	1.000.000	1.000.000	1.000.000	0.000000	0.000000	-	1	-	1	-	1	-	1	1	-	1	0	0
100218092|F|0-10:A>G-10:A>G	100218092	43608	TGCAGCCCACGTCGGAGTGTGGCGAGTGCATGATGAGGAACTCGTGCAGGTCGCCCTGGTTGAGGAACT	TGCAGCCCACRTCGGAGTGYGGYGAGTGCATRATGAGGAACTCGTGCAGGTCGCCCTGGYTGAGGAACT	4	4	10:A>G	10	0.500000	0.750000	0.250000	0.750000	0.250000	0.000000	0.375000	0.375000	0.375000	2.741.667	1.600.000	171.354	-0.250000	-0.17155	4	-0.09779	1.000.000	1.000.000	1.000.000	1.000.000	1.000.000	0.000000	0.000000	-	0	-	0	-	0	-	0	0	-	0	1	1
100218093|F|0--22:T>C	100218093	43608	TGCAGCCCACATCGGAGTGTGGTGAGTGCATAATGAGGAACTCGTGCAGGTCGCCCTGGCTGAGGAACT	TGCAGCCCACRTCGGAGTGYGGYGAGTGCATRATGAGGAACTCGTGCAGGTCGCCCTGGYTGAGGAACT	4	1		22	0.500000	0.250000	0.750000	0.250000	0.750000	0.000000	0.375000	0.375000	0.375000	3.475.000	2.163.636	160.609	-0.250000	-0.22391	4	-0.08199	1.000.000	1.000.000	1.000.000	1.000.000	1.000.000	2.000.000	2.000.000	-	1	-	1	-	0	-	0	0	-	0	0	0
100218093|F|0-22:T>C-22:T>C	100218093	43608	TGCAGCCCACATCGGAGTGTGGCGAGTGCATAATGAGGAACTCGTGCAGGTCGCCCTGGCTGAGGAACT	TGCAGCCCACRTCGGAGTGYGGYGAGTGCATRATGAGGAACTCGTGCAGGTCGCCCTGGYTGAGGAACT	4	1	22:T>C	22	0.500000	0.250000	0.750000	0.250000	0.750000	0.000000	0.375000	0.375000	0.375000	3.475.000	2.163.636	160.609	-0.250000	-0.22391	4	-0.08199	1.000.000	1.000.000	1.000.000	1.000.000	1.000.000	2.000.000	2.000.000	-	0	-	0	-	1	-	1	1	-	1	1	1
100218095|F|0--8:C>G	100218095	43609	TGCAGCGGCGGCGCTTTGGGAAGCAGCTGGTTCACCACTTCACGGCTTATATTAGGTGCCTGTTTGAGG	TGCAGCGGSGGCGCTTTRGGAAGCAGCTGGTTCACCACYTCACGGCTTATATTAGGYGCCTGTTTGAGK	4	2		8	0.500000	0.750000	0.250000	0.750000	0.250000	0.000000	0.375000	0.375000	0.375000	570.000	533.333	106.875	-0.250000	-0.18933	4	-0.07999	1.000.000	1.000.000	1.000.000	1.000.000	1.000.000	1.000.000	1.000.000	-	1	-	1	-	0	-	0	1	-	1	1	1
100218095|F|0-8:C>G-8:C>G	100218095	43609	TGCAGCGGGGGCGCTTTAGGAAGCAGCTGGTTCACCACTTCACGGCTTATATTAGGTGCCTGTTTGAGG	TGCAGCGGSGGCGCTTTRGGAAGCAGCTGGTTCACCACYTCACGGCTTATATTAGGYGCCTGTTTGAGK	4	2	8:C>G	8	0.500000	0.750000	0.250000	0.750000	0.250000	0.000000	0.375000	0.375000	0.375000	570.000	533.333	106.875	-0.250000	-0.18933	4	-0.07999	1.000.000	1.000.000	1.000.000	1.000.000	1.000.000	1.000.000	1.000.000	-	0	-	0	-	1	-	1	0	-	0	0	0
100218095|F|0--38:T>C	100218095	43609	TGCAGCGGCGGCGCTTTGGGAAGCAGCTGGTTCACCACTTCACGGCTTATATTAGGTGCCTGTTTGAGG	TGCAGCGGSGGCGCTTTRGGAAGCAGCTGGTTCACCACYTCACGGCTTATATTAGGYGCCTGTTTGAGK	4	4		38	0.500000	0.750000	0.250000	0.750000	0.250000	0.000000	0.375000	0.375000	0.375000	581.818	450.000	129.293	-0.250000	-0.17675	4	-0.07962	1.000.000	1.000.000	1.000.000	1.000.000	1.000.000	0.000000	0.000000	-	1	-	1	-	1	-	1	1	-	1	0	0
100218095|F|0-38:T>C-38:T>C	100218095	43609	TGCAGCGGCGGCGCTTTAGGAAGCAGCTGGTTCACCACCTCACGGCTTATATTAGGCGCCTGTTTGAGT	TGCAGCGGSGGCGCTTTRGGAAGCAGCTGGTTCACCACYTCACGGCTTATATTAGGYGCCTGTTTGAGK	4	4	38:T>C	38	0.500000	0.750000	0.250000	0.750000	0.250000	0.000000	0.375000	0.375000	0.375000	581.818	450.000	129.293	-0.250000	-0.17675	4	-0.07962	1.000.000	1.000.000	1.000.000	1.000.000	1.000.000	0.000000	0.000000	-	0	-	0	-	0	-	0	0	-	0	1	1
100218099|F|0--6:C>G	100218099	43610	TGCAGCCGTGCAAAGGGGACGGATGCCACCTACACAGCCTCACCATGGTCAGTTCGCCTTGACAAATGG	TGCAGCSGTRCAAAGGGGACGGATGCCACCYACACAGCCDCACCAYGGTCAGTTCGCCTTGACAAATGG	4	2		6	0.625000	0.200000	0.800000	0.200000	0.800000	0.000000	0.320000	0.320000	0.320000	900.000	514.286	175.000	-0.200000	-0.24345	4	-0.07301	1.000.000	1.000.000	1.000.000	1.000.000	1.000.000	2.000.000	2.000.000	-	0	-	0	-	0	-	0	1	-	1	0	0
100218099|F|0-6:C>G-6:C>G	100218099	43610	TGCAGCGGTGCAAAGGGGACGGATGCCACCTACACAGCCTCACCACGGTCAGTTCGCCTTGACAAATGG	TGCAGCSGTRCAAAGGGGACGGATGCCACCYACACAGCCDCACCAYGGTCAGTTCGCCTTGACAAATGG	4	2	6:C>G	6	0.625000	0.200000	0.800000	0.200000	0.800000	0.000000	0.320000	0.320000	0.320000	900.000	514.286	175.000	-0.200000	-0.24345	4	-0.07301	1.000.000	1.000.000	1.000.000	1.000.000	1.000.000	2.000.000	2.000.000	-	1	-	1	-	1	-	1	0	-	0	1	1
100218100|F|0--9:G>A	100218100	43610	TGCAGCGGTGCAAAGGGGACGGATGCCACCCACACAGCCACACCATGGTCAGTTCGCCTTGACAAATGG	TGCAGCSGTRCAAAGGGGACGGATGCCACCYACACAGCCDCACCAYGGTCAGTTCGCCTTGACAAATGG	4	2		9	0.625000	0.800000	0.200000	0.800000	0.200000	0.000000	0.320000	0.320000	0.320000	625.000	400.000	156.250	-0.200000	-0.16292	4	-0.08519	1.000.000	1.000.000	1.000.000	1.000.000	1.000.000	0.000000	0.000000	-	1	-	1	-	1	-	1	1	-	1	0	0
100218100|F|0-9:G>A-9:G>A	100218100	43610	TGCAGCGGTACAAAGGGGACGGATGCCACCCACACAGCCGCACCATGGTCAGTTCGCCTTGACAAATGG	TGCAGCSGTRCAAAGGGGACGGATGCCACCYACACAGCCDCACCAYGGTCAGTTCGCCTTGACAAATGG	4	2	9:G>A	9	0.625000	0.800000	0.200000	0.800000	0.200000	0.000000	0.320000	0.320000	0.320000	625.000	400.000	156.250	-0.200000	-0.16292	4	-0.08519	1.000.000	1.000.000	1.000.000	1.000.000	1.000.000	0.000000	0.000000	-	0	-	0	-	0	-	0	0	-	0	1	1
100218101|F|0--30:T>C	100218101	43610	TGCAGCGGTGCAAAGGGGACGGATGCCACCTACACAGCCTCACCACGGTCAGTTCGCCTTGACAAATGG	TGCAGCSGTRCAAAGGGGACGGATGCCACCYACACAGCCDCACCAYGGTCAGTTCGCCTTGACAAATGG	4	3		30	0.625000	0.600000	0.400000	0.600000	0.400000	0.000000	0.480000	0.480000	0.480000	708.333	383.333	184.783	-0.400000	-0.27946	4	-0.09789	1.000.000	1.000.000	1.000.000	1.000.000	1.000.000	2.000.000	2.000.000	-	1	-	1	-	1	-	1	1	-	1	0	0
100218101|F|0-30:T>C-30:T>C	100218101	43610	TGCAGCGGTGCAAAGGGGACGGATGCCACCCACACAGCCACACCATGGTCAGTTCGCCTTGACAAATGG	TGCAGCSGTRCAAAGGGGACGGATGCCACCYACACAGCCDCACCAYGGTCAGTTCGCCTTGACAAATGG	4	3	30:T>C	30	0.625000	0.600000	0.400000	0.600000	0.400000	0.000000	0.480000	0.480000	0.480000	708.333	383.333	184.783	-0.400000	-0.27946	4	-0.09789	1.000.000	1.000.000	1.000.000	1.000.000	1.000.000	2.000.000	2.000.000	-	0	-	0	-	0	-	0	0	-	0	1	1
100218103|F|0--5:C>A	100218103	43611	TGCAGCGTGGCCAGGCTCAGGTAGCTGCTCTTGGTCTTGAAGGTGACAGGGTCGGCGATGATGGAGCGC	TGCAGMGTRGCCAGGCTCAGGTARCTGCTCTTGGWCTTGAAGGTGACMGGGTCGGCGATRATGGAGCGC	4	3		5	0.562500	0.333333	0.666667	0.333333	0.666667	0.000000	0.444444	0.444444	0.444444	2.650.000	783.333	338.298	-0.333333	-0.23619	4	-0.11761	1.000.000	1.000.000	1.000.000	1.000.000	1.000.000	1.000.000	1.000.000	-	0	-	0	-	0	-	0	0	1	0	1	1
100218103|F|0-5:C>A-5:C>A	100218103	43611	TGCAGAGTGGCCAGGCTCAGGTAGCTGCTCTTGGACTTGAAGGTGACCGGGTCGGCGATGATGGAGCGC	TGCAGMGTRGCCAGGCTCAGGTARCTGCTCTTGGWCTTGAAGGTGACMGGGTCGGCGATRATGGAGCGC	4	3	5:C>A	5	0.562500	0.333333	0.666667	0.333333	0.666667	0.000000	0.444444	0.444444	0.444444	2.650.000	783.333	338.298	-0.333333	-0.23619	4	-0.11761	1.000.000	1.000.000	1.000.000	1.000.000	1.000.000	1.000.000	1.000.000	-	1	-	1	-	1	-	1	1	0	1	0	0
100218104|F|0--8:G>A	100218104	43611	TGCAGAGTGGCCAGGCTCAGGTAGCTGCTCTTGGACTTGAAGGTGACCGGGTCGGCGATGATGGAGCGC	TGCAGMGTRGCCAGGCTCAGGTARCTGCTCTTGGWCTTGAAGGTGACMGGGTCGGCGATRATGGAGCGC	4	1		8	0.562500	0.777778	0.222222	0.777778	0.222222	0.000000	0.345679	0.345679	0.345679	1.450.000	650.000	223.077	-0.222222	-0.17417	4	0.00497	1.000.000	1.000.000	1.000.000	1.000.000	1.000.000	2.000.000	2.000.000	-	1	-	1	-	0	-	0	1	1	1	1	1
100218104|F|0-8:G>A-8:G>A	100218104	43611	TGCAGAGTAGCCAGGCTCAGGTAGCTGCTCTTGGACTTGAAGGTGACCGGGTCGGCGATGATGGAGCGC	TGCAGMGTRGCCAGGCTCAGGTARCTGCTCTTGGWCTTGAAGGTGACMGGGTCGGCGATRATGGAGCGC	4	1	8:G>A	8	0.562500	0.777778	0.222222	0.777778	0.222222	0.000000	0.345679	0.345679	0.345679	1.450.000	650.000	223.077	-0.222222	-0.17417	4	0.00497	1.000.000	1.000.000	1.000.000	1.000.000	1.000.000	2.000.000	2.000.000	-	0	-	0	-	1	-	1	0	0	0	0	0
100218109|F|0--18:C>T	100218109	43613	TGCAGCTTCATTTTTCTCCCTAACAGCTTCTTGCCTGCTTTCTCTATCCTGTGACGCGTTACGCTAATT	TGCAGCTTCATTTTTCTCYCTAACAGCTTCTTGCCKGCTTTCTCTAYCCTGYGACGCGTTACGCTAATT	4	1		18	0.750000	0.500000	0.500000	0.500000	0.500000	0.000000	0.500000	0.500000	0.500000	1.763.636	1.550.000	113.783	-0.500000	-0.47345	4	-0.21249	1.000.000	1.000.000	1.000.000	1.000.000	1.000.000	4.000.000	4.000.000	-	0	-	0	1	0	1	0	0	-	0	1	1
100218109|F|0-18:C>T-18:C>T	100218109	43613	TGCAGCTTCATTTTTCTCTCTAACAGCTTCTTGCCTGCTTTCTCTATCCTGTGACGCGTTACGCTAATT	TGCAGCTTCATTTTTCTCYCTAACAGCTTCTTGCCKGCTTTCTCTAYCCTGYGACGCGTTACGCTAATT	4	1	18:C>T	18	0.750000	0.500000	0.500000	0.500000	0.500000	0.000000	0.500000	0.500000	0.500000	1.763.636	1.550.000	113.783	-0.500000	-0.47345	4	-0.21249	1.000.000	1.000.000	1.000.000	1.000.000	1.000.000	4.000.000	4.000.000	-	1	-	1	0	1	0	1	1	-	1	0	0
100218113|F|0--11:G>C	100218113	43614	TGCAGCTTGGAGAGCATGTTGCGCATGATGCGCGGCACGGGCCGCAGGTGGGCCAGCGTGACCACAGTG	TGCAGCTTGGASAGCATGTTGCGCATGATKCGBGGCACGGGCCGCAGGTGRGCCAGCGTGACCACRGTG	4	2		11	0.687500	0.090909	0.909091	0.090909	0.909091	0.000000	0.165289	0.165289	0.165289	1.100.000	916.667	120.000	-0.090909	-0.17137	4	-0.05120	1.000.000	1.000.000	1.000.000	1.000.000	1.000.000	0.000000	0.000000	-	0	-	0	-	0	-	0	0	1	0	0	0
100218113|F|0-11:G>C-11:G>C	100218113	43614	TGCAGCTTGGACAGCATGTTGCGCATGATGCGTGGCACGGGCCGCAGGTGGGCCAGCGTGACCACAGTG	TGCAGCTTGGASAGCATGTTGCGCATGATKCGBGGCACGGGCCGCAGGTGRGCCAGCGTGACCACRGTG	4	2	11:G>C	11	0.687500	0.090909	0.909091	0.090909	0.909091	0.000000	0.165289	0.165289	0.165289	1.100.000	916.667	120.000	-0.090909	-0.17137	4	-0.05120	1.000.000	1.000.000	1.000.000	1.000.000	1.000.000	0.000000	0.000000	-	1	-	1	-	1	-	1	1	0	1	1	1
100218114|F|0--29:T>G	100218114	43614	TGCAGCTTGGACAGCATGTTGCGCATGATTCGGGGCACGGGCCGCAGGTGAGCCAGCGTGACCACAGTG	TGCAGCTTGGASAGCATGTTGCGCATGATKCGBGGCACGGGCCGCAGGTGRGCCAGCGTGACCACRGTG	4	3		29	0.687500	0.181818	0.818182	0.181818	0.818182	0.000000	0.297521	0.297521	0.297521	1.000.000	906.667	110.294	-0.181818	-0.28793	4	-0.04737	1.000.000	1.000.000	1.000.000	1.000.000	1.000.000	2.000.000	2.000.000	-	0	-	0	-	0	-	0	0	0	0	0	0
100218114|F|0-29:T>G-29:T>G	100218114	43614	TGCAGCTTGGACAGCATGTTGCGCATGATGCGTGGCACGGGCCGCAGGTGGGCCAGCGTGACCACAGTG	TGCAGCTTGGASAGCATGTTGCGCATGATKCGBGGCACGGGCCGCAGGTGRGCCAGCGTGACCACRGTG	4	3	29:T>G	29	0.687500	0.181818	0.818182	0.181818	0.818182	0.000000	0.297521	0.297521	0.297521	1.000.000	906.667	110.294	-0.181818	-0.28793	4	-0.04737	1.000.000	1.000.000	1.000.000	1.000.000	1.000.000	2.000.000	2.000.000	-	1	-	1	-	1	-	1	1	1	1	1	1
100218115|F|0--65:G>A	100218115	43614	TGCAGCTTGGACAGCATGTTGCGCATGATGCGCGGCACGGGCCGCAGGTGGGCCAGCGTGACCACGGTG	TGCAGCTTGGASAGCATGTTGCGCATGATKCGBGGCACGGGCCGCAGGTGRGCCAGCGTGACCACRGTG	4	2		65	0.687500	0.181818	0.818182	0.181818	0.818182	0.000000	0.297521	0.297521	0.297521	1.600.000	847.059	188.889	-0.181818	-0.23770	4	-0.06520	1.000.000	1.000.000	1.000.000	1.000.000	1.000.000	0.000000	0.000000	-	0	-	0	-	0	-	0	0	0	0	1	1
100218115|F|0-65:G>A-65:G>A	100218115	43614	TGCAGCTTGGACAGCATGTTGCGCATGATGCGTGGCACGGGCCGCAGGTGGGCCAGCGTGACCACAGTG	TGCAGCTTGGASAGCATGTTGCGCATGATKCGBGGCACGGGCCGCAGGTGRGCCAGCGTGACCACRGTG	4	2	65:G>A	65	0.687500	0.181818	0.818182	0.181818	0.818182	0.000000	0.297521	0.297521	0.297521	1.600.000	847.059	188.889	-0.181818	-0.23770	4	-0.06520	1.000.000	1.000.000	1.000.000	1.000.000	1.000.000	0.000000	0.000000	-	1	-	1	-	1	-	1	1	1	1	0	0
100218130|F|0--17:T>C	100218130	43620	TGCAGGATGGTGGTGTCTGTCAGCAGCTGGATCTCCAGCAGCTCTGAGATGTTGCTGACGATGTCGCAC	TGCAGGATGGTGGTGTCYGTCAGCAGCTGGATCTCCAGCARCTCHGAGATGTTGCTGACGAYGTCGCAC	4	1		17	0.562500	0.444444	0.555556	0.444444	0.555556	0.000000	0.493827	0.493827	0.493827	737.500	580.000	127.155	-0.444444	-0.22747	4	-0.08496	1.000.000	1.000.000	1.000.000	1.000.000	1.000.000	0.000000	0.000000	-	1	-	1	-	0	-	0	1	0	1	0	0
100218130|F|0-17:T>C-17:T>C	100218130	43620	TGCAGGATGGTGGTGTCCGTCAGCAGCTGGATCTCCAGCAGCTCTGAGATGTTGCTGACGATGTCGCAC	TGCAGGATGGTGGTGTCYGTCAGCAGCTGGATCTCCAGCARCTCHGAGATGTTGCTGACGAYGTCGCAC	4	1	17:T>C	17	0.562500	0.444444	0.555556	0.444444	0.555556	0.000000	0.493827	0.493827	0.493827	737.500	580.000	127.155	-0.444444	-0.22747	4	-0.08496	1.000.000	1.000.000	1.000.000	1.000.000	1.000.000	0.000000	0.000000	-	0	-	0	-	1	-	1	0	1	0	1	1
100218133|F|0--7:T>C	100218133	43621	TGCAGGCTGGTGCCTCCCAGTTTGAGACCAGTGCTGCCAAACTCAAGAACAAGTACTGGTGGAAGAATG	TGCAGGCYGGWGCCTCCCARTTTGAGACCAGTGCYGCCAAACTCAAGAACAARTACTGGTGGAAGAATG	4	3		7	0.500000	0.750000	0.250000	0.750000	0.250000	0.000000	0.375000	0.375000	0.375000	675.000	400.000	168.750	-0.250000	-0.19387	4	-0.09112	1.000.000	1.000.000	1.000.000	1.000.000	1.000.000	1.000.000	1.000.000	-	1	-	1	-	1	-	1	1	-	1	0	0
100218133|F|0-7:T>C-7:T>C	100218133	43621	TGCAGGCCGGAGCCTCCCAGTTTGAGACCAGTGCCGCCAAACTCAAGAACAAGTACTGGTGGAAGAATG	TGCAGGCYGGWGCCTCCCARTTTGAGACCAGTGCYGCCAAACTCAAGAACAARTACTGGTGGAAGAATG	4	3	7:T>C	7	0.500000	0.750000	0.250000	0.750000	0.250000	0.000000	0.375000	0.375000	0.375000	675.000	400.000	168.750	-0.250000	-0.19387	4	-0.09112	1.000.000	1.000.000	1.000.000	1.000.000	1.000.000	1.000.000	1.000.000	-	0	-	0	-	0	-	0	0	-	0	1	1
100218134|F|0--52:A>G	100218134	43621	TGCAGGCTGGTGCCTCCCAATTTGAGACCAGTGCTGCCAAACTCAAGAACAAATACTGGTGGAAGAATG	TGCAGGCYGGWGCCTCCCARTTTGAGACCAGTGCYGCCAAACTCAAGAACAARTACTGGTGGAAGAATG	4	1		52	0.500000	0.250000	0.750000	0.250000	0.750000	0.000000	0.375000	0.375000	0.375000	900.000	518.182	173.684	-0.250000	-0.21014	4	-0.07360	1.000.000	1.000.000	1.000.000	1.000.000	1.000.000	2.000.000	2.000.000	-	1	-	1	-	0	-	0	0	-	0	0	0
100218134|F|0-52:A>G-52:A>G	100218134	43621	TGCAGGCTGGTGCCTCCCAATTTGAGACCAGTGCTGCCAAACTCAAGAACAAGTACTGGTGGAAGAATG	TGCAGGCYGGWGCCTCCCARTTTGAGACCAGTGCYGCCAAACTCAAGAACAARTACTGGTGGAAGAATG	4	1	52:A>G	52	0.500000	0.250000	0.750000	0.250000	0.750000	0.000000	0.375000	0.375000	0.375000	900.000	518.182	173.684	-0.250000	-0.21014	4	-0.07360	1.000.000	1.000.000	1.000.000	1.000.000	1.000.000	2.000.000	2.000.000	-	0	-	0	-	1	-	1	1	-	1	1	1
100218136|F|0--8:G>A	100218136	43622	TGCAGGCCGTGGCTCCAGATGCGCTCGAGCAGGTCGCACAGGCTGGCGATGAGCGTGTTCTCCTCCAGG	TGCAGGCCRTGGCTCCAGATGCGCTCGAGCAGGTCGCACAGGCTGGCGATGAGCGTGTTCTCCTCVASR	4	1		8	0.562500	0.888889	0.222222	0.777778	0.111111	0.111111	0.197531	0.345679	0.271605	800.000	550.000	145.455	0.000000	-0.20182	4	-0.01954	0.833333	1.000.000	0.916667	0.500000	1.000.000	2.000.000	2.000.000	-	0	-	1	-	1	-	1	1	1	1	1	1
100218136|F|0-8:G>A-8:G>A	100218136	43622	TGCAGGCCATGGCTCCAGATGCGCTCGAGCAGGTCGCACAGGCTGGCGATGAGCGTGTTCTCCTCCAGG	TGCAGGCCRTGGCTCCAGATGCGCTCGAGCAGGTCGCACAGGCTGGCGATGAGCGTGTTCTCCTCVASR	4	1	8:G>A	8	0.562500	0.888889	0.222222	0.777778	0.111111	0.111111	0.197531	0.345679	0.271605	800.000	550.000	145.455	0.000000	-0.20182	4	-0.01954	0.833333	1.000.000	0.916667	0.500000	1.000.000	2.000.000	2.000.000	-	1	-	1	-	0	-	0	0	0	0	0	0
100218142|F|0--18:T>C	100218142	43624	TGCAGGGATGCATTTCAATAGGTAATTAAAAGTGGGTCATAAATCAAAGAGTCTCCCATAAATATGGGA	TGCAGGGATGCATTTCAAYAGGTAATTAAAAGTGGGTCATAAATCAAASAGKCTCCCATAAATAYGGGA	4	1		18	0.562500	0.777778	0.222222	0.777778	0.222222	0.000000	0.345679	0.345679	0.345679	1.245.455	1.150.000	108.300	-0.222222	-0.24352	4	-0.05750	1.000.000	1.000.000	1.000.000	1.000.000	1.000.000	2.000.000	2.000.000	-	0	-	0	-	1	-	1	1	1	1	1	1
100218142|F|0-18:T>C-18:T>C	100218142	43624	TGCAGGGATGCATTTCAACAGGTAATTAAAAGTGGGTCATAAATCAAAGAGTCTCCCATAAATATGGGA	TGCAGGGATGCATTTCAAYAGGTAATTAAAAGTGGGTCATAAATCAAASAGKCTCCCATAAATAYGGGA	4	1	18:T>C	18	0.562500	0.777778	0.222222	0.777778	0.222222	0.000000	0.345679	0.345679	0.345679	1.245.455	1.150.000	108.300	-0.222222	-0.24352	4	-0.05750	1.000.000	1.000.000	1.000.000	1.000.000	1.000.000	2.000.000	2.000.000	-	1	-	1	-	0	-	0	0	0	0	0	0
100218143|F|0--48:C>G	100218143	43624	TGCAGGGATGCATTTCAATAGGTAATTAAAAGTGGGTCATAAATCAAACAGGCTCCCATAAATACGGGA	TGCAGGGATGCATTTCAAYAGGTAATTAAAAGTGGGTCATAAATCAAASAGKCTCCCATAAATAYGGGA	4	3		48	0.562500	0.222222	0.777778	0.222222	0.777778	0.000000	0.345679	0.345679	0.345679	1.250.000	1.215.385	102.848	-0.222222	-0.19066	4	-0.06348	1.000.000	1.000.000	1.000.000	1.000.000	1.000.000	0.000000	0.000000	-	0	-	0	-	0	-	0	0	0	0	1	1
100218143|F|0-48:C>G-48:C>G	100218143	43624	TGCAGGGATGCATTTCAATAGGTAATTAAAAGTGGGTCATAAATCAAAGAGTCTCCCATAAATATGGGA	TGCAGGGATGCATTTCAAYAGGTAATTAAAAGTGGGTCATAAATCAAASAGKCTCCCATAAATAYGGGA	4	3	48:C>G	48	0.562500	0.222222	0.777778	0.222222	0.777778	0.000000	0.345679	0.345679	0.345679	1.250.000	1.215.385	102.848	-0.222222	-0.19066	4	-0.06348	1.000.000	1.000.000	1.000.000	1.000.000	1.000.000	0.000000	0.000000	-	1	-	1	-	1	-	1	1	1	1	0	0
100218144|F|0--6:C>G	100218144	43625	TGCAGGCATGGCCTACGTGGAGAGGATGAACTATGTGCACAGGGACCTCCGGGCGGCCAACATCCTTGT	TGCAGKSATGGCCTACGTGGAGAGGATGAACTATGTRCACAGGGACCTCCGSGCRGCCAACATCCTTGT	4	3		6	0.500000	0.750000	0.250000	0.750000	0.250000	0.000000	0.375000	0.375000	0.375000	3.166.667	1.650.000	191.919	-0.250000	-0.15335	4	-0.02571	1.000.000	1.000.000	1.000.000	1.000.000	1.000.000	0.000000	0.000000	-	1	-	1	-	1	-	1	1	-	1	0	0
100218144|F|0-6:C>G-6:C>G	100218144	43625	TGCAGGGATGGCCTACGTGGAGAGGATGAACTATGTGCACAGGGACCTCCGCGCAGCCAACATCCTTGT	TGCAGKSATGGCCTACGTGGAGAGGATGAACTATGTRCACAGGGACCTCCGSGCRGCCAACATCCTTGT	4	3	6:C>G	6	0.500000	0.750000	0.250000	0.750000	0.250000	0.000000	0.375000	0.375000	0.375000	3.166.667	1.650.000	191.919	-0.250000	-0.15335	4	-0.02571	1.000.000	1.000.000	1.000.000	1.000.000	1.000.000	0.000000	0.000000	-	0	-	0	-	0	-	0	0	-	0	1	1
100218144|F|0--36:G>A	100218144	43625	TGCAGGCATGGCCTACGTGGAGAGGATGAACTATGTGCACAGGGACCTCCGGGCGGCCAACATCCTTGT	TGCAGKSATGGCCTACGTGGAGAGGATGAACTATGTRCACAGGGACCTCCGSGCRGCCAACATCCTTGT	4	1		36	0.500000	0.750000	0.250000	0.750000	0.250000	0.000000	0.375000	0.375000	0.375000	3.220.000	2.275.000	141.538	-0.250000	-0.18483	4	-0.01721	1.000.000	1.000.000	1.000.000	1.000.000	1.000.000	2.000.000	2.000.000	-	1	-	1	-	0	-	0	1	-	1	1	1
100218144|F|0-36:G>A-36:G>A	100218144	43625	TGCAGGCATGGCCTACGTGGAGAGGATGAACTATGTACACAGGGACCTCCGGGCGGCCAACATCCTTGT	TGCAGKSATGGCCTACGTGGAGAGGATGAACTATGTRCACAGGGACCTCCGSGCRGCCAACATCCTTGT	4	1	36:G>A	36	0.500000	0.750000	0.250000	0.750000	0.250000	0.000000	0.375000	0.375000	0.375000	3.220.000	2.275.000	141.538	-0.250000	-0.18483	4	-0.01721	1.000.000	1.000.000	1.000.000	1.000.000	1.000.000	2.000.000	2.000.000	-	0	-	0	-	1	-	1	0	-	0	0	0
100218149|F|0--7:G>C	100218149	43627	TGCAGGGGCTCTCTTTCAACGGCGTGCCCTACCTGGACCAGTGCAAGAACGGGGACATCTCATACTGCG	TGCAGGGSCTCTCYTTCAACGGYGTGCCCTACCTGGACCAGTGCAAGAAYGGGGACATCTCRTACTGCG	4	5		7	0.562500	0.888889	0.111111	0.888889	0.111111	0.000000	0.197531	0.197531	0.197531	1.878.571	950.000	197.744	-0.111111	-0.14537	4	-0.08619	1.000.000	1.000.000	1.000.000	1.000.000	1.000.000	1.000.000	1.000.000	-	1	-	1	-	1	-	1	1	0	1	1	1
100218149|F|0-7:G>C-7:G>C	100218149	43627	TGCAGGGCCTCTCCTTCAACGGTGTGCCCTACCTGGACCAGTGCAAGAATGGGGACATCTCGTACTGCG	TGCAGGGSCTCTCYTTCAACGGYGTGCCCTACCTGGACCAGTGCAAGAAYGGGGACATCTCRTACTGCG	4	5	7:G>C	7	0.562500	0.888889	0.111111	0.888889	0.111111	0.000000	0.197531	0.197531	0.197531	1.878.571	950.000	197.744	-0.111111	-0.14537	4	-0.08619	1.000.000	1.000.000	1.000.000	1.000.000	1.000.000	1.000.000	1.000.000	-	0	-	0	-	0	-	0	0	1	0	0	0
100218150|F|0--13:T>C	100218150	43627	TGCAGGGGCTCTCTTTCAACGGCGTGCCCTACCTGGACCAGTGCAAGAACGGGGACATCTCGTACTGCG	TGCAGGGSCTCTCYTTCAACGGYGTGCCCTACCTGGACCAGTGCAAGAAYGGGGACATCTCRTACTGCG	4	1		13	0.562500	0.666667	0.333333	0.666667	0.333333	0.000000	0.444444	0.444444	0.444444	2.033.333	950.000	214.035	-0.333333	-0.20767	4	-0.08153	1.000.000	1.000.000	1.000.000	1.000.000	1.000.000	1.000.000	1.000.000	-	1	-	1	-	1	-	1	1	0	1	0	0
100218150|F|0-13:T>C-13:T>C	100218150	43627	TGCAGGGGCTCTCCTTCAACGGCGTGCCCTACCTGGACCAGTGCAAGAACGGGGACATCTCGTACTGCG	TGCAGGGSCTCTCYTTCAACGGYGTGCCCTACCTGGACCAGTGCAAGAAYGGGGACATCTCRTACTGCG	4	1	13:T>C	13	0.562500	0.666667	0.333333	0.666667	0.333333	0.000000	0.444444	0.444444	0.444444	2.033.333	950.000	214.035	-0.333333	-0.20767	4	-0.08153	1.000.000	1.000.000	1.000.000	1.000.000	1.000.000	1.000.000	1.000.000	-	0	-	0	-	0	-	0	0	1	0	1	1
100218150|F|0--61:G>A	100218150	43627	TGCAGGGGCTCTCTTTCAACGGCGTGCCCTACCTGGACCAGTGCAAGAACGGGGACATCTCGTACTGCG	TGCAGGGSCTCTCYTTCAACGGYGTGCCCTACCTGGACCAGTGCAAGAAYGGGGACATCTCRTACTGCG	4	1		61	0.562500	0.777778	0.222222	0.777778	0.222222	0.000000	0.345679	0.345679	0.345679	1.816.667	1.600.000	113.542	-0.222222	-0.20576	4	-0.03389	1.000.000	1.000.000	1.000.000	1.000.000	1.000.000	2.000.000	2.000.000	-	1	-	1	-	0	-	0	1	1	1	1	1
100218150|F|0-61:G>A-61:G>A	100218150	43627	TGCAGGGGCTCTCTTTCAACGGCGTGCCCTACCTGGACCAGTGCAAGAACGGGGACATCTCATACTGCG	TGCAGGGSCTCTCYTTCAACGGYGTGCCCTACCTGGACCAGTGCAAGAAYGGGGACATCTCRTACTGCG	4	1	61:G>A	61	0.562500	0.777778	0.222222	0.777778	0.222222	0.000000	0.345679	0.345679	0.345679	1.816.667	1.600.000	113.542	-0.222222	-0.20576	4	-0.03389	1.000.000	1.000.000	1.000.000	1.000.000	1.000.000	2.000.000	2.000.000	-	0	-	0	-	1	-	1	0	0	0	0	0
100218152|F|0--21:C>T	100218152	43628	TGCAGGTATCATTAGCATGGGCCTGTAGAGTCATTATTGATCCTCCAGCTGCTAATGGCATGAGATCGG	TGCAGGTATCATTAGCATGGGYCTGTWKAGYCATTATTGATCCWYCAGCTGCTAATGGCATGAGATCGG	4	3		21	0.687500	0.454545	0.545455	0.454545	0.545455	0.000000	0.495868	0.495868	0.495868	537.500	445.455	120.663	-0.454545	-0.27051	4	-0.12278	1.000.000	1.000.000	1.000.000	1.000.000	1.000.000	3.000.000	3.000.000	-	0	-	0	-	0	-	0	0	1	0	1	1
100218152|F|0-21:C>T-21:C>T	100218152	43628	TGCAGGTATCATTAGCATGGGTCTGTATAGCCATTATTGATCCTCCAGCTGCTAATGGCATGAGATCGG	TGCAGGTATCATTAGCATGGGYCTGTWKAGYCATTATTGATCCWYCAGCTGCTAATGGCATGAGATCGG	4	3	21:C>T	21	0.687500	0.454545	0.545455	0.454545	0.545455	0.000000	0.495868	0.495868	0.495868	537.500	445.455	120.663	-0.454545	-0.27051	4	-0.12278	1.000.000	1.000.000	1.000.000	1.000.000	1.000.000	3.000.000	3.000.000	-	1	-	1	-	1	-	1	1	0	1	0	0
100218155|F|0--10:T>C	100218155	43629	TGCAGGTGGGTTCTCTCGAGCAGTCCATGCTTGATGCCTTGGTGCTGGACAGAGTGGACTTTGTGAAGC	TGCAGGTGGGYTCTYTSGAGCAGTCSATGCTTGAYGCCTTGGTGCTGGACAGRGTGGACTTTGTGAAGC	4	1		10	0.562500	0.222222	0.777778	0.222222	0.777778	0.000000	0.345679	0.345679	0.345679	2.300.000	2.050.000	112.195	-0.222222	-0.23854	4	-0.04663	1.000.000	1.000.000	1.000.000	1.000.000	1.000.000	2.000.000	2.000.000	-	1	-	1	-	0	-	0	0	0	0	0	0
100218155|F|0-10:T>C-10:T>C	100218155	43629	TGCAGGTGGGCTCTCTCGAGCAGTCCATGCTTGATGCCTTGGTGCTGGACAGAGTGGACTTTGTGAAGC	TGCAGGTGGGYTCTYTSGAGCAGTCSATGCTTGAYGCCTTGGTGCTGGACAGRGTGGACTTTGTGAAGC	4	1	10:T>C	10	0.562500	0.222222	0.777778	0.222222	0.777778	0.000000	0.345679	0.345679	0.345679	2.300.000	2.050.000	112.195	-0.222222	-0.23854	4	-0.04663	1.000.000	1.000.000	1.000.000	1.000.000	1.000.000	2.000.000	2.000.000	-	0	-	0	-	1	-	1	1	1	1	1	1
100218156|F|0--14:C>T	100218156	43629	TGCAGGTGGGCTCTCTGGAGCAGTCCATGCTTGACGCCTTGGTGCTGGACAGAGTGGACTTTGTGAAGC	TGCAGGTGGGYTCTYTSGAGCAGTCSATGCTTGAYGCCTTGGTGCTGGACAGRGTGGACTTTGTGAAGC	4	3		14	0.562500	0.888889	0.111111	0.888889	0.111111	0.000000	0.197531	0.197531	0.197531	2.160.000	1.400.000	154.286	-0.111111	-0.14295	4	-0.09803	1.000.000	1.000.000	1.000.000	1.000.000	1.000.000	0.000000	0.000000	-	1	-	1	-	1	-	1	1	0	1	1	1
100218156|F|0-14:C>T-14:C>T	100218156	43629	TGCAGGTGGGCTCTTTGGAGCAGTCGATGCTTGACGCCTTGGTGCTGGACAGGGTGGACTTTGTGAAGC	TGCAGGTGGGYTCTYTSGAGCAGTCSATGCTTGAYGCCTTGGTGCTGGACAGRGTGGACTTTGTGAAGC	4	3	14:C>T	14	0.562500	0.888889	0.111111	0.888889	0.111111	0.000000	0.197531	0.197531	0.197531	2.160.000	1.400.000	154.286	-0.111111	-0.14295	4	-0.09803	1.000.000	1.000.000	1.000.000	1.000.000	1.000.000	0.000000	0.000000	-	0	-	0	-	0	-	0	0	1	0	0	0
100218165|F|0--7:C>T	100218165	43633	TGCAGTGCGCTCTGGGATAGGAGGCTGGGTCCTGTGTTGAAAGCAATTTGGAGCAGGCAGTGATGCAGA	TGCAGTGYGCTSTGGGATAGGAGGCTGGGTCCTGYGTTGRAAGCAATTTGGAGCAGGCRGTGATGCAGA	4	4		7	0.562500	0.333333	0.666667	0.333333	0.666667	0.000000	0.444444	0.444444	0.444444	1.116.667	950.000	117.544	-0.333333	-0.22935	4	-0.12866	1.000.000	1.000.000	1.000.000	1.000.000	1.000.000	2.000.000	2.000.000	-	0	-	0	-	0	-	0	0	1	0	1	1
100218165|F|0-7:C>T-7:C>T	100218165	43633	TGCAGTGTGCTGTGGGATAGGAGGCTGGGTCCTGCGTTGGAAGCAATTTGGAGCAGGCAGTGATGCAGA	TGCAGTGYGCTSTGGGATAGGAGGCTGGGTCCTGYGTTGRAAGCAATTTGGAGCAGGCRGTGATGCAGA	4	4	7:C>T	7	0.562500	0.333333	0.666667	0.333333	0.666667	0.000000	0.444444	0.444444	0.444444	1.116.667	950.000	117.544	-0.333333	-0.22935	4	-0.12866	1.000.000	1.000.000	1.000.000	1.000.000	1.000.000	2.000.000	2.000.000	-	1	-	1	-	1	-	1	1	0	1	0	0
100218166|F|0--11:G>C	100218166	43633	TGCAGTGTGCTGTGGGATAGGAGGCTGGGTCCTGCGTTGGAAGCAATTTGGAGCAGGCAGTGATGCAGA	TGCAGTGYGCTSTGGGATAGGAGGCTGGGTCCTGYGTTGRAAGCAATTTGGAGCAGGCRGTGATGCAGA	4	1		11	0.562500	0.222222	0.777778	0.222222	0.777778	0.000000	0.345679	0.345679	0.345679	1.100.000	978.571	112.409	-0.222222	-0.22659	4	-0.05204	1.000.000	1.000.000	1.000.000	1.000.000	1.000.000	2.000.000	2.000.000	-	0	-	0	-	0	-	0	1	0	1	0	0
100218166|F|0-11:G>C-11:G>C	100218166	43633	TGCAGTGTGCTCTGGGATAGGAGGCTGGGTCCTGCGTTGGAAGCAATTTGGAGCAGGCAGTGATGCAGA	TGCAGTGYGCTSTGGGATAGGAGGCTGGGTCCTGYGTTGRAAGCAATTTGGAGCAGGCRGTGATGCAGA	4	1	11:G>C	11	0.562500	0.222222	0.777778	0.222222	0.777778	0.000000	0.345679	0.345679	0.345679	1.100.000	978.571	112.409	-0.222222	-0.22659	4	-0.05204	1.000.000	1.000.000	1.000.000	1.000.000	1.000.000	2.000.000	2.000.000	-	1	-	1	-	1	-	1	0	1	0	1	1
100218168|F|0--13:G>A	100218168	43634	TGCAGTGCTCTGTGCCTCGCTCTCTCTGGCTGGGCTGCTCCTCGGTGGCAGAGAGCTTGTGTGCACTGA	TGCAGTGCTCTGTRCCKCGCTCTCTMTGGCTSGGCTGCTCYTCGGTGGCAGAGAGCTTGTGTGCACTGA	4	3		13	0.937500	0.600000	0.400000	0.600000	0.400000	0.000000	0.480000	0.480000	0.480000	1.393.750	1.027.273	135.675	-0.400000	-0.60132	4	-0.18213	1.000.000	1.000.000	1.000.000	1.000.000	1.000.000	5.000.000	5.000.000	1	0	1	0	1	0	1	0	0	1	0	1	1
100218168|F|0-13:G>A-13:G>A	100218168	43634	TGCAGTGCTCTGTACCTCGCTCTCTATGGCTCGGCTGCTCCTCGGTGGCAGAGAGCTTGTGTGCACTGA	TGCAGTGCTCTGTRCCKCGCTCTCTMTGGCTSGGCTGCTCYTCGGTGGCAGAGAGCTTGTGTGCACTGA	4	3	13:G>A	13	0.937500	0.600000	0.400000	0.600000	0.400000	0.000000	0.480000	0.480000	0.480000	1.393.750	1.027.273	135.675	-0.400000	-0.60132	4	-0.18213	1.000.000	1.000.000	1.000.000	1.000.000	1.000.000	5.000.000	5.000.000	0	1	0	1	0	1	0	1	1	0	1	0	0
100218169|F|0--16:G>T	100218169	43634	TGCAGTGCTCTGTGCCGCGCTCTCTCTGGCTCGGCTGCTCTTCGGTGGCAGAGAGCTTGTGTGCACTGA	TGCAGTGCTCTGTRCCKCGCTCTCTMTGGCTSGGCTGCTCYTCGGTGGCAGAGAGCTTGTGTGCACTGA	4	3		16	0.937500	0.133333	0.866667	0.133333	0.866667	0.000000	0.231111	0.231111	0.231111	1.450.000	1.208.696	119.964	-0.133333	-0.47892	4	-0.24125	1.000.000	1.000.000	1.000.000	1.000.000	1.000.000	2.000.000	2.000.000	0	0	0	0	0	0	0	0	0	0	0	0	0
100218169|F|0-16:G>T-16:G>T	100218169	43634	TGCAGTGCTCTGTGCCTCGCTCTCTCTGGCTGGGCTGCTCCTCGGTGGCAGAGAGCTTGTGTGCACTGA	TGCAGTGCTCTGTRCCKCGCTCTCTMTGGCTSGGCTGCTCYTCGGTGGCAGAGAGCTTGTGTGCACTGA	4	3	16:G>T	16	0.937500	0.133333	0.866667	0.133333	0.866667	0.000000	0.231111	0.231111	0.231111	1.450.000	1.208.696	119.964	-0.133333	-0.47892	4	-0.24125	1.000.000	1.000.000	1.000.000	1.000.000	1.000.000	2.000.000	2.000.000	1	1	1	1	1	1	1	1	1	1	1	1	1
100218171|F|0--7:T>C	100218171	43635	TGCAGTGTTTCTACGAGTGGGAGAGCAGCATCCTAGCGCAGTTCAACTGCATTGGGCGTGCACGCAGCT	TGCAGTGYTTCTACGAGTGGGAGAGCAGCATCCTRGCGCAGTTCAACTGCATYGGSCGTGCRCGCAGCT	4	4		7	0.625000	0.800000	0.200000	0.800000	0.200000	0.000000	0.320000	0.320000	0.320000	366.667	250.000	146.667	-0.200000	-0.21671	4	-0.06985	1.000.000	1.000.000	1.000.000	1.000.000	1.000.000	0.000000	0.000000	-	1	-	1	-	1	-	1	1	-	1	0	0
100218171|F|0-7:T>C-7:T>C	100218171	43635	TGCAGTGCTTCTACGAGTGGGAGAGCAGCATCCTGGCGCAGTTCAACTGCATCGGGCGTGCGCGCAGCT	TGCAGTGYTTCTACGAGTGGGAGAGCAGCATCCTRGCGCAGTTCAACTGCATYGGSCGTGCRCGCAGCT	4	4	7:T>C	7	0.625000	0.800000	0.200000	0.800000	0.200000	0.000000	0.320000	0.320000	0.320000	366.667	250.000	146.667	-0.200000	-0.21671	4	-0.06985	1.000.000	1.000.000	1.000.000	1.000.000	1.000.000	0.000000	0.000000	-	0	-	0	-	0	-	0	0	-	0	1	1
100218171|F|0--34:A>G	100218171	43635	TGCAGTGTTTCTACGAGTGGGAGAGCAGCATCCTAGCGCAGTTCAACTGCATTGGGCGTGCACGCAGCT	TGCAGTGYTTCTACGAGTGGGAGAGCAGCATCCTRGCGCAGTTCAACTGCATYGGSCGTGCRCGCAGCT	4	3		34	0.625000	0.600000	0.400000	0.600000	0.400000	0.000000	0.480000	0.480000	0.480000	400.000	266.667	150.000	-0.400000	-0.29713	4	-0.10668	1.000.000	1.000.000	1.000.000	1.000.000	1.000.000	2.000.000	2.000.000	-	1	-	1	-	1	-	1	1	-	1	0	0
100218171|F|0-34:A>G-34:A>G	100218171	43635	TGCAGTGTTTCTACGAGTGGGAGAGCAGCATCCTGGCGCAGTTCAACTGCATCGGCCGTGCACGCAGCT	TGCAGTGYTTCTACGAGTGGGAGAGCAGCATCCTRGCGCAGTTCAACTGCATYGGSCGTGCRCGCAGCT	4	3	34:A>G	34	0.625000	0.600000	0.400000	0.600000	0.400000	0.000000	0.480000	0.480000	0.480000	400.000	266.667	150.000	-0.400000	-0.29713	4	-0.10668	1.000.000	1.000.000	1.000.000	1.000.000	1.000.000	2.000.000	2.000.000	-	0	-	0	-	0	-	0	0	-	0	1	1
100218174|F|0--14:T>G	100218174	43636	TGCAGTTATTGATCTTGTTGATTTTATGTCTCAGCATTTGCATAATCTATTAAAGATGAATGATTCATG	TGCAGTTATTGATCKTGTTGATTTTATGTCTCRRCATTWGCATAATCTATTAAAGATGAATGATTCATG	4	2		14	0.750000	0.833333	0.166667	0.833333	0.166667	0.000000	0.277778	0.277778	0.277778	481.250	266.667	180.469	-0.166667	-0.24383	4	-0.07511	1.000.000	1.000.000	1.000.000	1.000.000	1.000.000	1.000.000	1.000.000	1	1	1	1	0	1	0	1	1	-	1	1	1
100218174|F|0-14:T>G-14:T>G	100218174	43636	TGCAGTTATTGATCGTGTTGATTTTATGTCTCGGCATTTGCATAATCTATTAAAGATGAATGATTCATG	TGCAGTTATTGATCKTGTTGATTTTATGTCTCRRCATTWGCATAATCTATTAAAGATGAATGATTCATG	4	2	14:T>G	14	0.750000	0.833333	0.166667	0.833333	0.166667	0.000000	0.277778	0.277778	0.277778	481.250	266.667	180.469	-0.166667	-0.24383	4	-0.07511	1.000.000	1.000.000	1.000.000	1.000.000	1.000.000	1.000.000	1.000.000	0	0	0	0	1	0	1	0	0	-	0	0	0
100218174|F|0--32:A>G	100218174	43636	TGCAGTTATTGATCTTGTTGATTTTATGTCTCAGCATTTGCATAATCTATTAAAGATGAATGATTCATG	TGCAGTTATTGATCKTGTTGATTTTATGTCTCRRCATTWGCATAATCTATTAAAGATGAATGATTCATG	4	1		32	0.750000	0.666667	0.333333	0.666667	0.333333	0.000000	0.444444	0.444444	0.444444	466.667	414.286	112.644	-0.333333	-0.32837	4	-0.09968	1.000.000	1.000.000	1.000.000	1.000.000	1.000.000	3.000.000	3.000.000	0	1	0	1	0	1	0	1	1	-	1	1	1
100218174|F|0-32:A>G-32:A>G	100218174	43636	TGCAGTTATTGATCTTGTTGATTTTATGTCTCGGCATTTGCATAATCTATTAAAGATGAATGATTCATG	TGCAGTTATTGATCKTGTTGATTTTATGTCTCRRCATTWGCATAATCTATTAAAGATGAATGATTCATG	4	1	32:A>G	32	0.750000	0.666667	0.333333	0.666667	0.333333	0.000000	0.444444	0.444444	0.444444	466.667	414.286	112.644	-0.333333	-0.32837	4	-0.09968	1.000.000	1.000.000	1.000.000	1.000.000	1.000.000	3.000.000	3.000.000	1	0	1	0	1	0	1	0	0	-	0	0	0
100218174|F|0--33:G>A	100218174	43636	TGCAGTTATTGATCTTGTTGATTTTATGTCTCAGCATTTGCATAATCTATTAAAGATGAATGATTCATG	TGCAGTTATTGATCKTGTTGATTTTATGTCTCRRCATTWGCATAATCTATTAAAGATGAATGATTCATG	4	2		33	0.750000	0.833333	0.166667	0.833333	0.166667	0.000000	0.277778	0.277778	0.277778	464.706	300.000	154.902	-0.166667	-0.22851	4	-0.07441	1.000.000	1.000.000	1.000.000	1.000.000	1.000.000	0.000000	0.000000	1	1	1	1	1	1	1	1	1	-	1	0	0
100218174|F|0-33:G>A-33:G>A	100218174	43636	TGCAGTTATTGATCTTGTTGATTTTATGTCTCAACATTAGCATAATCTATTAAAGATGAATGATTCATG	TGCAGTTATTGATCKTGTTGATTTTATGTCTCRRCATTWGCATAATCTATTAAAGATGAATGATTCATG	4	2	33:G>A	33	0.750000	0.833333	0.166667	0.833333	0.166667	0.000000	0.277778	0.277778	0.277778	464.706	300.000	154.902	-0.166667	-0.22851	4	-0.07441	1.000.000	1.000.000	1.000.000	1.000.000	1.000.000	0.000000	0.000000	0	0	0	0	0	0	0	0	0	-	0	1	1
100218177|F|0--38:C>T	100218177	43637	TGCAGTTCTCTGCTTCATAGGTCAGAAGCTTGTTTACTCTGTTTCCGTGGCTACGCTCAGTCCCAGCCA	TGCAGTTCTCTGCTTCATAGGTCAGAAGCTTGTTTACTYTGTTTCYGTGGCTAYGCTCAGTCCCARCCA	4	2		38	0.500000	0.500000	0.500000	0.500000	0.500000	0.000000	0.500000	0.500000	0.500000	2.200.000	987.500	222.785	-0.500000	-0.27081	3	-0.06261	1.000.000	1.000.000	1.000.000	1.000.000	1.000.000	4.000.000	3.000.000	1	-	1	-	1	-	1	-	-	-	-	0	0
100218177|F|0-38:C>T-38:C>T	100218177	43637	TGCAGTTCTCTGCTTCATAGGTCAGAAGCTTGTTTACTTTGTTTCCGTGGCTACGCTCAGTCCCAACCA	TGCAGTTCTCTGCTTCATAGGTCAGAAGCTTGTTTACTYTGTTTCYGTGGCTAYGCTCAGTCCCARCCA	4	2	38:C>T	38	0.500000	0.500000	0.500000	0.500000	0.500000	0.000000	0.500000	0.500000	0.500000	2.200.000	987.500	222.785	-0.500000	-0.27081	3	-0.06261	1.000.000	1.000.000	1.000.000	1.000.000	1.000.000	4.000.000	3.000.000	0	-	0	-	0	-	0	-	-	-	-	1	1
100218178|F|0--45:C>T	100218178	43637	TGCAGTTCTCTGCTTCATAGGTCAGAAGCTTGTTTACTTTGTTTCCGTGGCTATGCTCAGTCCCAACCA	TGCAGTTCTCTGCTTCATAGGTCAGAAGCTTGTTTACTYTGTTTCYGTGGCTAYGCTCAGTCCCARCCA	4	1		45	0.562500	0.777778	0.222222	0.777778	0.222222	0.000000	0.345679	0.345679	0.345679	2.553.846	575.000	444.147	-0.222222	-0.20814	4	-0.03321	1.000.000	1.000.000	1.000.000	1.000.000	1.000.000	1.000.000	1.000.000	1	-	1	-	1	-	1	-	-	1	-	0	0
100218178|F|0-45:C>T-45:C>T	100218178	43637	TGCAGTTCTCTGCTTCATAGGTCAGAAGCTTGTTTACTTTGTTTCTGTGGCTATGCTCAGTCCCAACCA	TGCAGTTCTCTGCTTCATAGGTCAGAAGCTTGTTTACTYTGTTTCYGTGGCTAYGCTCAGTCCCARCCA	4	1	45:C>T	45	0.562500	0.777778	0.222222	0.777778	0.222222	0.000000	0.345679	0.345679	0.345679	2.553.846	575.000	444.147	-0.222222	-0.20814	4	-0.03321	1.000.000	1.000.000	1.000.000	1.000.000	1.000.000	1.000.000	1.000.000	0	-	0	-	0	-	0	-	-	0	-	1	1
100218179|F|0--53:C>T	100218179	43637	TGCAGTTCTCTGCTTCATAGGTCAGAAGCTTGTTTACTTTGTTTCCGTGGCTACGCTCAGTCCCAACCA	TGCAGTTCTCTGCTTCATAGGTCAGAAGCTTGTTTACTYTGTTTCYGTGGCTAYGCTCAGTCCCARCCA	4	1		53	0.562500	0.222222	0.777778	0.222222	0.777778	0.000000	0.345679	0.345679	0.345679	1.400.000	946.154	147.967	-0.222222	-0.26856	3	-0.04121	1.000.000	1.000.000	1.000.000	1.000.000	1.000.000	2.000.000	2.000.000	0	-	0	-	0	-	0	-	-	0	-	0	0
100218179|F|0-53:C>T-53:C>T	100218179	43637	TGCAGTTCTCTGCTTCATAGGTCAGAAGCTTGTTTACTTTGTTTCCGTGGCTATGCTCAGTCCCAACCA	TGCAGTTCTCTGCTTCATAGGTCAGAAGCTTGTTTACTYTGTTTCYGTGGCTAYGCTCAGTCCCARCCA	4	1	53:C>T	53	0.562500	0.222222	0.777778	0.222222	0.777778	0.000000	0.345679	0.345679	0.345679	1.400.000	946.154	147.967	-0.222222	-0.26856	3	-0.04121	1.000.000	1.000.000	1.000.000	1.000.000	1.000.000	2.000.000	2.000.000	1	-	1	-	1	-	1	-	-	1	-	1	1
100218915|F|0--11:C>T	100218915	43941	TGCAGCTCCTACTCCCAGCAGCAGTTTGCCCAGCAGGGGAACATGTCACCCTACGGTGGCATGATGATG	TGCAGCTCCTAYYCCCAGCAGCAGTTTRCCCAGCAGGGGAACATGTCACCCTAYGGTGGCATGATRATG	4	3		11	0.500000	0.750000	0.250000	0.750000	0.250000	0.000000	0.375000	0.375000	0.375000	381.818	366.667	104.132	-0.250000	-0.17004	4	-0.07916	1.000.000	1.000.000	1.000.000	1.000.000	1.000.000	1.000.000	1.000.000	-	1	-	1	-	1	-	1	1	0	1	0	-
100218915|F|0-11:C>T-11:C>T	100218915	43941	TGCAGCTCCTATCCCCAGCAGCAGTTTGCCCAGCAGGGGAACATGTCACCCTATGGTGGCATGATGATG	TGCAGCTCCTAYYCCCAGCAGCAGTTTRCCCAGCAGGGGAACATGTCACCCTAYGGTGGCATGATRATG	4	3	11:C>T	11	0.500000	0.750000	0.250000	0.750000	0.250000	0.000000	0.375000	0.375000	0.375000	381.818	366.667	104.132	-0.250000	-0.17004	4	-0.07916	1.000.000	1.000.000	1.000.000	1.000.000	1.000.000	1.000.000	1.000.000	-	0	-	0	-	0	-	0	0	1	0	1	-
100218915|F|0--27:G>A	100218915	43941	TGCAGCTCCTACTCCCAGCAGCAGTTTGCCCAGCAGGGGAACATGTCACCCTACGGTGGCATGATGATG	TGCAGCTCCTAYYCCCAGCAGCAGTTTRCCCAGCAGGGGAACATGTCACCCTAYGGTGGCATGATRATG	4	2		27	0.500000	0.750000	0.250000	0.750000	0.250000	0.000000	0.375000	0.375000	0.375000	418.182	233.333	179.221	-0.250000	-0.17484	4	-0.03283	1.000.000	1.000.000	1.000.000	1.000.000	1.000.000	1.000.000	1.000.000	-	1	-	1	-	0	-	0	1	1	1	1	-
100218915|F|0-27:G>A-27:G>A	100218915	43941	TGCAGCTCCTACCCCCAGCAGCAGTTTACCCAGCAGGGGAACATGTCACCCTACGGTGGCATGATGATG	TGCAGCTCCTAYYCCCAGCAGCAGTTTRCCCAGCAGGGGAACATGTCACCCTAYGGTGGCATGATRATG	4	2	27:G>A	27	0.500000	0.750000	0.250000	0.750000	0.250000	0.000000	0.375000	0.375000	0.375000	418.182	233.333	179.221	-0.250000	-0.17484	4	-0.03283	1.000.000	1.000.000	1.000.000	1.000.000	1.000.000	1.000.000	1.000.000	-	0	-	0	-	1	-	1	0	0	0	0	-
100219018|F|0--10:C>A	100219018	43981	TGCAGGAGCGCCACAACAACCAGATCTGGAACATCATCCAGGAGCACCTCTACATTGACATCTTCGACG	TGCAGGAGCGMCASAACAACCAGATCTGGAACATCATCCARGAGCACCTSTACATYGACATCTTCGAYG	4	5		10	0.437500	0.857143	0.142857	0.857143	0.142857	0.000000	0.244898	0.244898	0.244898	1.118.182	800.000	139.773	-0.142857	-0.14348	3	-0.02337	1.000.000	1.000.000	1.000.000	1.000.000	1.000.000	1.000.000	1.000.000	-	1	-	1	-	1	-	1	1	0	1	-	-
100219018|F|0-10:C>A-10:C>A	100219018	43981	TGCAGGAGCGACAGAACAACCAGATCTGGAACATCATCCAGGAGCACCTGTACATCGACATCTTCGATG	TGCAGGAGCGMCASAACAACCAGATCTGGAACATCATCCARGAGCACCTSTACATYGACATCTTCGAYG	4	5	10:C>A	10	0.437500	0.857143	0.142857	0.857143	0.142857	0.000000	0.244898	0.244898	0.244898	1.118.182	800.000	139.773	-0.142857	-0.14348	3	-0.02337	1.000.000	1.000.000	1.000.000	1.000.000	1.000.000	1.000.000	1.000.000	-	0	-	0	-	0	-	0	0	1	0	-	-
100219019|F|0--13:G>C	100219019	43981	TGCAGGAGCGCCAGAACAACCAGATCTGGAACATCATCCAAGAGCACCTCTACATCGACATCTTCGATG	TGCAGGAGCGMCASAACAACCAGATCTGGAACATCATCCARGAGCACCTSTACATYGACATCTTCGAYG	4	4		13	0.562500	0.333333	0.666667	0.333333	0.666667	0.000000	0.444444	0.444444	0.444444	1.816.667	1.118.182	162.466	-0.333333	-0.29708	4	-0.07983	1.000.000	1.000.000	1.000.000	1.000.000	1.000.000	3.000.000	3.000.000	-	0	-	0	-	0	-	0	0	1	0	-	-
100219019|F|0-13:G>C-13:G>C	100219019	43981	TGCAGGAGCGCCACAACAACCAGATCTGGAACATCATCCAGGAGCACCTCTACATTGACATCTTCGACG	TGCAGGAGCGMCASAACAACCAGATCTGGAACATCATCCARGAGCACCTSTACATYGACATCTTCGAYG	4	4	13:G>C	13	0.562500	0.333333	0.666667	0.333333	0.666667	0.000000	0.444444	0.444444	0.444444	1.816.667	1.118.182	162.466	-0.333333	-0.29708	4	-0.07983	1.000.000	1.000.000	1.000.000	1.000.000	1.000.000	3.000.000	3.000.000	-	1	-	1	-	1	-	1	1	0	1	-	-
100219591|F|0--14:A>C	100219591	44207	TGCAGGAAGTCCTCAGTCTTGCATATGGTGGGAAAGTTGCTGAGGCACATGTTCCAGGAGAGCTTGGAC	TGCAGGAAGTCCTCMGTCTTGCATATKGTGGGRAAGTTGCTSAGGCACATGYTCCAGGAGAGCTTGGAS	4	4		14	0.562500	0.666667	0.333333	0.666667	0.333333	0.000000	0.444444	0.444444	0.444444	1.390.909	1.033.333	134.604	-0.333333	-0.18590	4	-0.11933	1.000.000	1.000.000	1.000.000	1.000.000	1.000.000	0.000000	0.000000	-	1	-	1	-	1	-	1	1	0	1	0	0
100219591|F|0-14:A>C-14:A>C	100219591	44207	TGCAGGAAGTCCTCCGTCTTGCATATGGTGGGGAAGTTGCTGAGGCACATGCTCCAGGAGAGCTTGGAG	TGCAGGAAGTCCTCMGTCTTGCATATKGTGGGRAAGTTGCTSAGGCACATGYTCCAGGAGAGCTTGGAS	4	4	14:A>C	14	0.562500	0.666667	0.333333	0.666667	0.333333	0.000000	0.444444	0.444444	0.444444	1.390.909	1.033.333	134.604	-0.333333	-0.18590	4	-0.11933	1.000.000	1.000.000	1.000.000	1.000.000	1.000.000	0.000000	0.000000	-	0	-	0	-	0	-	0	0	1	0	1	1
100219591|F|0--51:T>C	100219591	44207	TGCAGGAAGTCCTCAGTCTTGCATATGGTGGGAAAGTTGCTGAGGCACATGTTCCAGGAGAGCTTGGAC	TGCAGGAAGTCCTCMGTCTTGCATATKGTGGGRAAGTTGCTSAGGCACATGYTCCAGGAGAGCTTGGAS	4	1		51	0.562500	0.222222	0.777778	0.222222	0.777778	0.000000	0.345679	0.345679	0.345679	1.475.000	1.250.000	118.000	-0.222222	-0.21430	4	-0.04082	1.000.000	1.000.000	1.000.000	1.000.000	1.000.000	2.000.000	2.000.000	-	0	-	0	-	0	-	0	1	0	1	0	0
100219591|F|0-51:T>C-51:T>C	100219591	44207	TGCAGGAAGTCCTCAGTCTTGCATATGGTGGGAAAGTTGCTGAGGCACATGCTCCAGGAGAGCTTGGAC	TGCAGGAAGTCCTCMGTCTTGCATATKGTGGGRAAGTTGCTSAGGCACATGYTCCAGGAGAGCTTGGAS	4	1	51:T>C	51	0.562500	0.222222	0.777778	0.222222	0.777778	0.000000	0.345679	0.345679	0.345679	1.475.000	1.250.000	118.000	-0.222222	-0.21430	4	-0.04082	1.000.000	1.000.000	1.000.000	1.000.000	1.000.000	2.000.000	2.000.000	-	1	-	1	-	1	-	1	0	1	0	1	1
100219901|F|0--9:G>C	100219901	44364	TGCAGCTACGAGCCTGCTGGAGCACCCATGCATGAGATCGGAAGAGCGGTTCAGCAGGAATGCCGAGAC	TGCAGCTMCSAGCCTGCTGGAGCASCCATGCATGAGATCGGAAGAGCGGTTCAGCAGGAATGCCGAGAC	4	1		9	0.437500	0.285714	0.714286	0.285714	0.714286	0.000000	0.408163	0.408163	0.408163	8.200.000	5.533.333	148.193	-0.285714	-0.19474	4	-0.04880	1.000.000	1.000.000	1.000.000	1.000.000	1.000.000	2.000.000	2.000.000	-	1	-	1	-	0	-	0	0	-	0	-	-
100219901|F|0-9:G>C-9:G>C	100219901	44364	TGCAGCTACCAGCCTGCTGGAGCACCCATGCATGAGATCGGAAGAGCGGTTCAGCAGGAATGCCGAGAC	TGCAGCTMCSAGCCTGCTGGAGCASCCATGCATGAGATCGGAAGAGCGGTTCAGCAGGAATGCCGAGAC	4	1	9:G>C	9	0.437500	0.285714	0.714286	0.285714	0.714286	0.000000	0.408163	0.408163	0.408163	8.200.000	5.533.333	148.193	-0.285714	-0.19474	4	-0.04880	1.000.000	1.000.000	1.000.000	1.000.000	1.000.000	2.000.000	2.000.000	-	0	-	0	-	1	-	1	1	-	1	-	-
100219902|F|0--24:C>G	100219902	44364	TGCAGCTACCAGCCTGCTGGAGCACCCATGCATGAGATCGGAAGAGCGGTTCAGCAGGAATGCCGAGAC	TGCAGCTMCSAGCCTGCTGGAGCASCCATGCATGAGATCGGAAGAGCGGTTCAGCAGGAATGCCGAGAC	4	1		24	0.437500	0.571429	0.428571	0.571429	0.428571	0.000000	0.489796	0.489796	0.489796	8.162.500	3.480.000	234.555	-0.428571	-0.17125	4	-0.05941	1.000.000	1.000.000	1.000.000	1.000.000	1.000.000	2.000.000	2.000.000	-	1	-	1	-	0	-	0	1	-	1	-	-
100219902|F|0-24:C>G-24:C>G	100219902	44364	TGCAGCTACCAGCCTGCTGGAGCAGCCATGCATGAGATCGGAAGAGCGGTTCAGCAGGAATGCCGAGAC	TGCAGCTMCSAGCCTGCTGGAGCASCCATGCATGAGATCGGAAGAGCGGTTCAGCAGGAATGCCGAGAC	4	1	24:C>G	24	0.437500	0.571429	0.428571	0.571429	0.428571	0.000000	0.489796	0.489796	0.489796	8.162.500	3.480.000	234.555	-0.428571	-0.17125	4	-0.05941	1.000.000	1.000.000	1.000.000	1.000.000	1.000.000	2.000.000	2.000.000	-	0	-	0	-	1	-	1	0	-	0	-	-
100219919|F|0--14:T>C	100219919	44374	TGCAGAATGGAATGTAAGTGAAGTCAGGGCTTGCGGGAAGGAGCATGAGATCGGAAGAGCGGTTCAGCA	TGCAGMMTGGAATGYAAGTGAAGTCAGRRCTTGCGGGAAGGAGCATGAGATCGGAAGAGCGGTTCAGCA	4	3		14	0.562500	0.666667	0.333333	0.666667	0.333333	0.000000	0.444444	0.444444	0.444444	4.641.667	2.933.333	158.239	-0.333333	-0.23262	4	0.00052	1.000.000	1.000.000	1.000.000	1.000.000	1.000.000	2.000.000	2.000.000	-	1	-	1	-	1	-	1	1	0	1	0	0
100219919|F|0-14:T>C-14:T>C	100219919	44374	TGCAGAATGGAATGCAAGTGAAGTCAGAACTTGCGGGAAGGAGCATGAGATCGGAAGAGCGGTTCAGCA	TGCAGMMTGGAATGYAAGTGAAGTCAGRRCTTGCGGGAAGGAGCATGAGATCGGAAGAGCGGTTCAGCA	4	3	14:T>C	14	0.562500	0.666667	0.333333	0.666667	0.333333	0.000000	0.444444	0.444444	0.444444	4.641.667	2.933.333	158.239	-0.333333	-0.23262	4	0.00052	1.000.000	1.000.000	1.000.000	1.000.000	1.000.000	2.000.000	2.000.000	-	0	-	0	-	0	-	0	0	1	0	1	1
100219921|F|0--6:C>A	100219921	44375	TGCAGACCTTTAACAGCCTGCATGAGATCGGAAGAGCGGTTCAGCAGGAATGCCGAGACCGATCTCGTA	TGCAGAMYKTWWACAGSCTGCATGAGATCGGAAGAGCGGTTCAGCAGGAATGCCGAGACCGATCTCGTA	4	4		6	0.500000	0.250000	0.750000	0.250000	0.750000	0.000000	0.375000	0.375000	0.375000	7.475.000	6.300.000	118.651	-0.250000	-0.22586	3	-0.02614	1.000.000	1.000.000	1.000.000	1.000.000	1.000.000	2.000.000	2.000.000	0	-	0	-	0	-	0	-	-	-	-	0	0
100219921|F|0-6:C>A-6:C>A	100219921	44375	TGCAGAATTTAAACAGGCTGCATGAGATCGGAAGAGCGGTTCAGCAGGAATGCCGAGACCGATCTCGTA	TGCAGAMYKTWWACAGSCTGCATGAGATCGGAAGAGCGGTTCAGCAGGAATGCCGAGACCGATCTCGTA	4	4	6:C>A	6	0.500000	0.250000	0.750000	0.250000	0.750000	0.000000	0.375000	0.375000	0.375000	7.475.000	6.300.000	118.651	-0.250000	-0.22586	3	-0.02614	1.000.000	1.000.000	1.000.000	1.000.000	1.000.000	2.000.000	2.000.000	1	-	1	-	1	-	1	-	-	-	-	1	1
100219922|F|0--8:T>G	100219922	44375	TGCAGAATTTAAACAGGCTGCATGAGATCGGAAGAGCGGTTCAGCAGGAATGCCGAGACCGATCTCGTA	TGCAGAMYKTWWACAGSCTGCATGAGATCGGAAGAGCGGTTCAGCAGGAATGCCGAGACCGATCTCGTA	4	2		8	0.500000	0.750000	0.250000	0.750000	0.250000	0.000000	0.375000	0.375000	0.375000	7.125.000	4.000.000	178.125	-0.250000	-0.17524	4	-0.04161	1.000.000	1.000.000	1.000.000	1.000.000	1.000.000	0.000000	0.000000	1	-	1	-	1	-	1	-	-	-	-	0	0
100219922|F|0-8:T>G-8:T>G	100219922	44375	TGCAGAATGTATACAGGCTGCATGAGATCGGAAGAGCGGTTCAGCAGGAATGCCGAGACCGATCTCGTA	TGCAGAMYKTWWACAGSCTGCATGAGATCGGAAGAGCGGTTCAGCAGGAATGCCGAGACCGATCTCGTA	4	2	8:T>G	8	0.500000	0.750000	0.250000	0.750000	0.250000	0.000000	0.375000	0.375000	0.375000	7.125.000	4.000.000	178.125	-0.250000	-0.17524	4	-0.04161	1.000.000	1.000.000	1.000.000	1.000.000	1.000.000	0.000000	0.000000	0	-	0	-	0	-	0	-	-	-	-	1	1
100219929|F|0--10:A>G	100219929	44379	TGCAGACCAGAGCTTCGGCTAAGATCATCTGCCCGCATCGAAGCATGAGATCGGAAGAGCGGTTCAGCA	TGCAGAMCAGRGCYTCGGCTAARATCATCTGCCCRCATCGAAGCATGAGATCGGAAGAGCGGTTCAGCA	4	3		10	0.562500	0.222222	0.777778	0.222222	0.777778	0.000000	0.345679	0.345679	0.345679	8.450.000	5.721.429	147.690	-0.222222	-0.18389	4	-0.01335	1.000.000	1.000.000	1.000.000	1.000.000	1.000.000	0.000000	0.000000	-	0	-	0	-	0	-	0	0	0	0	1	1
100219929|F|0-10:A>G-10:A>G	100219929	44379	TGCAGACCAGGGCCTCGGCTAAGATCATCTGCCCACATCGAAGCATGAGATCGGAAGAGCGGTTCAGCA	TGCAGAMCAGRGCYTCGGCTAARATCATCTGCCCRCATCGAAGCATGAGATCGGAAGAGCGGTTCAGCA	4	3	10:A>G	10	0.562500	0.222222	0.777778	0.222222	0.777778	0.000000	0.345679	0.345679	0.345679	8.450.000	5.721.429	147.690	-0.222222	-0.18389	4	-0.01335	1.000.000	1.000.000	1.000.000	1.000.000	1.000.000	0.000000	0.000000	-	1	-	1	-	1	-	1	1	1	1	0	0
100219930|F|0--22:G>A	100219930	44379	TGCAGACCAGGGCCTCGGCTAAGATCATCTGCCCACATCGAAGCATGAGATCGGAAGAGCGGTTCAGCA	TGCAGAMCAGRGCYTCGGCTAARATCATCTGCCCRCATCGAAGCATGAGATCGGAAGAGCGGTTCAGCA	4	2		22	0.562500	0.888889	0.111111	0.888889	0.111111	0.000000	0.197531	0.197531	0.197531	6.457.143	3.300.000	195.671	-0.111111	-0.14717	4	-0.01870	1.000.000	1.000.000	1.000.000	1.000.000	1.000.000	1.000.000	1.000.000	-	1	-	1	-	1	-	1	1	0	1	1	1
100219930|F|0-22:G>A-22:G>A	100219930	44379	TGCAGACCAGGGCCTCGGCTAAAATCATCTGCCCGCATCGAAGCATGAGATCGGAAGAGCGGTTCAGCA	TGCAGAMCAGRGCYTCGGCTAARATCATCTGCCCRCATCGAAGCATGAGATCGGAAGAGCGGTTCAGCA	4	2	22:G>A	22	0.562500	0.888889	0.111111	0.888889	0.111111	0.000000	0.197531	0.197531	0.197531	6.457.143	3.300.000	195.671	-0.111111	-0.14717	4	-0.01870	1.000.000	1.000.000	1.000.000	1.000.000	1.000.000	1.000.000	1.000.000	-	0	-	0	-	0	-	0	0	1	0	0	0
100219932|F|0--7:C>G	100219932	44380	TGCAGACCTTGCAGAACAGCATGAGATCGGAAGAGCGGTTCAGCAGGAATGCCGAGACCGATCTCGTAT	TGCAGACSYTRCAGAACMGCATGAGATCGGAAGAGCGGTTCAGCAGGAATGCCGAGACCGATCTCGTAT	4	3		7	0.500000	0.875000	0.125000	0.875000	0.125000	0.000000	0.218750	0.218750	0.218750	7.784.615	5.450.000	142.837	-0.125000	-0.12755	4	0.00760	1.000.000	1.000.000	1.000.000	1.000.000	1.000.000	1.000.000	1.000.000	-	1	-	1	-	1	-	1	1	0	1	-	1
100219932|F|0-7:C>G-7:C>G	100219932	44380	TGCAGACGCTACAGAACAGCATGAGATCGGAAGAGCGGTTCAGCAGGAATGCCGAGACCGATCTCGTAT	TGCAGACSYTRCAGAACMGCATGAGATCGGAAGAGCGGTTCAGCAGGAATGCCGAGACCGATCTCGTAT	4	3	7:C>G	7	0.500000	0.875000	0.125000	0.875000	0.125000	0.000000	0.218750	0.218750	0.218750	7.784.615	5.450.000	142.837	-0.125000	-0.12755	4	0.00760	1.000.000	1.000.000	1.000.000	1.000.000	1.000.000	1.000.000	1.000.000	-	0	-	0	-	0	-	0	0	1	0	-	0
100219934|F|0--8:A>G	100219934	44381	TGCAGACGATGTGGAGCCATCCTTTGTAAAGGAAAGGAAGTGAGTGGCATGAGATCGGAAGAGCGGTTC	TGCAGMCGRYGTGGAGCCATCCTTTGTAAAGGAAAGGAAGTGARYGGCATGAGATCGGAAGAGCGGTTC	4	4		8	0.687500	0.181818	0.818182	0.181818	0.818182	0.000000	0.297521	0.297521	0.297521	9.075.000	7.043.750	128.838	-0.181818	-0.32843	4	-0.05874	1.000.000	1.000.000	1.000.000	1.000.000	1.000.000	2.000.000	2.000.000	-	0	-	0	-	0	-	0	0	0	0	0	0
100219934|F|0-8:A>G-8:A>G	100219934	44381	TGCAGACGGCGTGGAGCCATCCTTTGTAAAGGAAAGGAAGTGAACGGCATGAGATCGGAAGAGCGGTTC	TGCAGMCGRYGTGGAGCCATCCTTTGTAAAGGAAAGGAAGTGARYGGCATGAGATCGGAAGAGCGGTTC	4	4	8:A>G	8	0.687500	0.181818	0.818182	0.181818	0.818182	0.000000	0.297521	0.297521	0.297521	9.075.000	7.043.750	128.838	-0.181818	-0.32843	4	-0.05874	1.000.000	1.000.000	1.000.000	1.000.000	1.000.000	2.000.000	2.000.000	-	1	-	1	-	1	-	1	1	1	1	1	1
100219956|F|0--5:A>T	100219956	44390	TGCAGAGCTTCTTGGCAAGAATCATGCATGAGATCGGAAGAGCGGTTCAGCAGGAATGCCGAGACCGAT	TGCAGWGYTTCTTGGCAAGRATCRTGCMTGAGATCGGAAGAGCGGTTCAGCAGGAATGCCGAGACCGAT	4	1		5	0.562500	0.777778	0.222222	0.777778	0.222222	0.000000	0.345679	0.345679	0.345679	8.114.286	5.850.000	138.706	-0.222222	-0.20457	4	-0.04501	1.000.000	1.000.000	1.000.000	1.000.000	1.000.000	2.000.000	2.000.000	-	1	-	1	-	0	-	0	1	1	1	1	1
100219956|F|0-5:A>T-5:A>T	100219956	44390	TGCAGTGCTTCTTGGCAAGAATCATGCATGAGATCGGAAGAGCGGTTCAGCAGGAATGCCGAGACCGAT	TGCAGWGYTTCTTGGCAAGRATCRTGCMTGAGATCGGAAGAGCGGTTCAGCAGGAATGCCGAGACCGAT	4	1	5:A>T	5	0.562500	0.777778	0.222222	0.777778	0.222222	0.000000	0.345679	0.345679	0.345679	8.114.286	5.850.000	138.706	-0.222222	-0.20457	4	-0.04501	1.000.000	1.000.000	1.000.000	1.000.000	1.000.000	2.000.000	2.000.000	-	0	-	0	-	1	-	1	0	0	0	0	0
100219956|F|0--7:C>T	100219956	44390	TGCAGAGCTTCTTGGCAAGAATCATGCATGAGATCGGAAGAGCGGTTCAGCAGGAATGCCGAGACCGAT	TGCAGWGYTTCTTGGCAAGRATCRTGCMTGAGATCGGAAGAGCGGTTCAGCAGGAATGCCGAGACCGAT	4	3		7	0.562500	0.666667	0.333333	0.666667	0.333333	0.000000	0.444444	0.444444	0.444444	8.616.667	5.616.667	153.412	-0.333333	-0.23371	4	-0.03743	1.000.000	1.000.000	1.000.000	1.000.000	1.000.000	2.000.000	2.000.000	-	1	-	1	-	1	-	1	1	0	1	0	0
100219956|F|0-7:C>T-7:C>T	100219956	44390	TGCAGAGTTTCTTGGCAAGGATCGTGCATGAGATCGGAAGAGCGGTTCAGCAGGAATGCCGAGACCGAT	TGCAGWGYTTCTTGGCAAGRATCRTGCMTGAGATCGGAAGAGCGGTTCAGCAGGAATGCCGAGACCGAT	4	3	7:C>T	7	0.562500	0.666667	0.333333	0.666667	0.333333	0.000000	0.444444	0.444444	0.444444	8.616.667	5.616.667	153.412	-0.333333	-0.23371	4	-0.03743	1.000.000	1.000.000	1.000.000	1.000.000	1.000.000	2.000.000	2.000.000	-	0	-	0	-	0	-	0	0	1	0	1	1
100219960|F|0--6:G>T	100219960	44392	TGCAGAGACGAAAGGAGGAGCATGAGATCGGAAGAGCGGTTCAGCAGGAATGCCGAGACCGATCTCGTA	TGCAGAKACGRAMGGARRAGCATGAGATCGGAAGAGCGGTTCAGCAGGAATGCCGAGACCGATCTCGTA	4	5		6	0.625000	0.200000	0.800000	0.200000	0.800000	0.000000	0.320000	0.320000	0.320000	10.525.000	9.350.000	112.567	-0.200000	-0.28878	4	-0.08422	1.000.000	1.000.000	1.000.000	1.000.000	1.000.000	2.000.000	2.000.000	-	0	-	0	-	0	-	0	0	-	0	0	0
100219960|F|0-6:G>T-6:G>T	100219960	44392	TGCAGATACGGACGGAAAAGCATGAGATCGGAAGAGCGGTTCAGCAGGAATGCCGAGACCGATCTCGTA	TGCAGAKACGRAMGGARRAGCATGAGATCGGAAGAGCGGTTCAGCAGGAATGCCGAGACCGATCTCGTA	4	5	6:G>T	6	0.625000	0.200000	0.800000	0.200000	0.800000	0.000000	0.320000	0.320000	0.320000	10.525.000	9.350.000	112.567	-0.200000	-0.28878	4	-0.08422	1.000.000	1.000.000	1.000.000	1.000.000	1.000.000	2.000.000	2.000.000	-	1	-	1	-	1	-	1	1	-	1	1	1
100219963|F|0--6:C>T	100219963	44393	TGCAGACCGCCTGGGCGCTTGCTGCTTTCTCCTCGGCATGAGATCGGAAGAGCGGTTCAGCAGGAATGC	TGCAGMYCGCCKBGGCGCTTGCTGCTTTCTCCTCGGCATGAGATCGGAAGAGCGGTTCAGCAGGAATGC	4	3		6	0.500000	0.625000	0.375000	0.625000	0.375000	0.000000	0.468750	0.468750	0.468750	6.888.889	3.220.000	213.941	-0.375000	-0.18532	4	-0.04473	1.000.000	1.000.000	1.000.000	1.000.000	1.000.000	2.000.000	2.000.000	1	-	1	-	1	-	1	1	-	0	-	0	0
100219963|F|0-6:C>T-6:C>T	100219963	44393	TGCAGATCGCCGCGGCGCTTGCTGCTTTCTCCTCGGCATGAGATCGGAAGAGCGGTTCAGCAGGAATGC	TGCAGMYCGCCKBGGCGCTTGCTGCTTTCTCCTCGGCATGAGATCGGAAGAGCGGTTCAGCAGGAATGC	4	3	6:C>T	6	0.500000	0.625000	0.375000	0.625000	0.375000	0.000000	0.468750	0.468750	0.468750	6.888.889	3.220.000	213.941	-0.375000	-0.18532	4	-0.04473	1.000.000	1.000.000	1.000.000	1.000.000	1.000.000	2.000.000	2.000.000	0	-	0	-	0	-	0	0	-	1	-	1	1
100219965|F|0--9:A>C	100219965	44394	TGCAGATGCAGGGTCTGCTTCATTAGGACAAACTGAGTGCATGAGATCGGAAGAGCGGTTCAGCAGGAA	TGCAGATGCMGGGYCTGCTTCATTAGGMCAAACTGASTGCATGAGATCGGAAGAGCGGTTCAGCAGGAA	4	3		9	0.562500	0.666667	0.333333	0.666667	0.333333	0.000000	0.444444	0.444444	0.444444	8.033.333	3.233.333	248.454	-0.333333	-0.24189	4	-0.05020	1.000.000	1.000.000	1.000.000	1.000.000	1.000.000	2.000.000	2.000.000	-	1	-	1	-	1	-	1	1	0	1	0	0
100219965|F|0-9:A>C-9:A>C	100219965	44394	TGCAGATGCCGGGCCTGCTTCATTAGGACAAACTGACTGCATGAGATCGGAAGAGCGGTTCAGCAGGAA	TGCAGATGCMGGGYCTGCTTCATTAGGMCAAACTGASTGCATGAGATCGGAAGAGCGGTTCAGCAGGAA	4	3	9:A>C	9	0.562500	0.666667	0.333333	0.666667	0.333333	0.000000	0.444444	0.444444	0.444444	8.033.333	3.233.333	248.454	-0.333333	-0.24189	4	-0.05020	1.000.000	1.000.000	1.000.000	1.000.000	1.000.000	2.000.000	2.000.000	-	0	-	0	-	0	-	0	0	1	0	1	1
100219967|F|0--19:T>C	100219967	44395	TGCAGATTGATGAGCTGTATGAGGCATACTGCATGAGATCGGAAGAGCGGTTCAGCAGGAATGCCGAGA	TGCAGATTGAYGAGCTGTAYGMGGCMTACTGCATGAGATCGGAAGAGCGGTTCAGCAGGAATGCCGAGA	4	2		19	0.500000	0.500000	0.500000	0.500000	0.500000	0.000000	0.500000	0.500000	0.500000	6.675.000	3.314.286	201.401	-0.500000	-0.22719	4	-0.05292	1.000.000	1.000.000	1.000.000	1.000.000	1.000.000	2.000.000	2.000.000	-	1	-	1	-	0	-	0	1	-	1	0	0
100219967|F|0-19:T>C-19:T>C	100219967	44395	TGCAGATTGATGAGCTGTACGAGGCCTACTGCATGAGATCGGAAGAGCGGTTCAGCAGGAATGCCGAGA	TGCAGATTGAYGAGCTGTAYGMGGCMTACTGCATGAGATCGGAAGAGCGGTTCAGCAGGAATGCCGAGA	4	2	19:T>C	19	0.500000	0.500000	0.500000	0.500000	0.500000	0.000000	0.500000	0.500000	0.500000	6.675.000	3.314.286	201.401	-0.500000	-0.22719	4	-0.05292	1.000.000	1.000.000	1.000.000	1.000.000	1.000.000	2.000.000	2.000.000	-	0	-	0	-	1	-	1	0	-	0	1	1
100219977|F|0--10:T>G	100219977	44400	TGCAGCAGGTTTCCCACAGAGCTCTGTGCTCCCAGCATGAGATCGGAAGAGCGGTTCAGCAGGAATGCC	TGCAGCAGGTKTCYCACAGAGCTCTGTGCTYSCAGCATGAGATCGGAAGAGCGGTTCAGCAGGAATGCC	4	3		10	0.500000	0.750000	0.250000	0.750000	0.250000	0.000000	0.375000	0.375000	0.375000	2.081.818	1.900.000	109.569	-0.250000	-0.12244	3	-0.00910	1.000.000	1.000.000	1.000.000	1.000.000	1.000.000	1.000.000	1.000.000	-	1	-	1	-	1	-	1	1	-	1	0	0
100219977|F|0-10:T>G-10:T>G	100219977	44400	TGCAGCAGGTGTCCCACAGAGCTCTGTGCTTGCAGCATGAGATCGGAAGAGCGGTTCAGCAGGAATGCC	TGCAGCAGGTKTCYCACAGAGCTCTGTGCTYSCAGCATGAGATCGGAAGAGCGGTTCAGCAGGAATGCC	4	3	10:T>G	10	0.500000	0.750000	0.250000	0.750000	0.250000	0.000000	0.375000	0.375000	0.375000	2.081.818	1.900.000	109.569	-0.250000	-0.12244	3	-0.00910	1.000.000	1.000.000	1.000.000	1.000.000	1.000.000	1.000.000	1.000.000	-	0	-	0	-	0	-	0	0	-	0	1	1
[truncated: 2,144 more rows]
